# Supplementary material for: Combinatorial Pooling Enables Selective Sequencing of the Barley Gene Space
Source: PLoS Comput Biol. 2013 Apr 4;9(4):e1003010. doi: 10.1371/journal.pcbi.1003010 (PMC3617026; doi:10.1371/journal.pcbi.1003010)
Supplement: Dataset S1 — Excel file Dataset_S1 contains the pool-by-pool statistics of the number of rice reads deconvoluted to one BAC (column C), two BACs (column D), and three BACs (column E), as well as the percentage of reads deconvoluted as a fraction of the total number of reads in each pool (column F). Columns G-K report the paired-end read analysis: for each paired-end read (total is column G), we looked at the set of BACs assigned to the left read (set ) and the right read (set ) via deconvolution. The number of paired-end reads for which at least one of and were non-empty is reported in column I. Of these, we compared and : if the number of shared BACs in was equal to the we declared that paired-end read concordant. Column J reports the number of concordant deconvoluted paired-end reads. (XLSX) [file pcbi.1003010.s001.xlsx]

## Sheet: rice pools
Rice Pool	Total reads (counting paired-end as two singles)	Total reads from (B) decovoluted to 1 BAC	Total reads from (B) decovoluted to 2 BAC	Total reads from (B) decovoluted to 3 BAC	Percentage of reads in (B) deconvoluted to 1,2 or 3 BACs	Total paired-end reads in (B)	Paired-end reads for which both ends did not deconvolute	Paired-end reads for which at least one end deconvoluted	Concordant paired-end reads	Percentage of (I) that were concordant
1	2000000	390925	1021202	218965	0.815546	1000000	118817	881183	758729	0.861035
2	2000000	401930	1010577	226119	0.819313	1000000	112426	887574	761002	0.857396
3	2000000	446845	1019560	199438	0.832921	1000000	105815	894185	778440	0.870558
4	2000000	460513	1012335	187729	0.830288	1000000	106791	893209	771799	0.864074
5	2000000	455705	947515	222519	0.81287	1000000	124334	875666	756665	0.864102
6	2000000	391456	1044628	198262	0.817173	1000000	119574	880426	763032	0.866662
7	2000000	391010	1045500	230553	0.833531	1000000	103332	896668	779914	0.869791
8	2000000	388850	991831	243614	0.812148	1000000	122398	877602	756059	0.861506
9	2000000	381752	975607	256767	0.807063	1000000	123686	876314	746838	0.852249
10	2000000	346968	1045075	243428	0.817735	1000000	117329	882671	759841	0.860843
11	2000000	394704	964910	227215	0.793415	1000000	137708	862292	733833	0.851026
12	2000000	420363	936500	222287	0.789575	1000000	139191	860809	733282	0.851852
13	2000000	411143	969745	239441	0.810164	1000000	124251	875749	757037	0.864445
14	2000000	386831	1028001	226478	0.820655	1000000	115203	884797	760044	0.859004
15	2000000	360496	1053183	245686	0.829682	1000000	106295	893705	774556	0.86668
16	2000000	413108	1031143	193165	0.818708	1000000	117690	882310	765576	0.867695
17	2000000	426155	984613	202242	0.806505	1000000	126585	873415	745978	0.854093
18	2000000	425161	972202	229742	0.813553	1000000	119379	880621	755754	0.858206
19	2000000	377124	993507	256679	0.813655	1000000	121825	878175	757470	0.86255
20	2000000	392747	1012836	216100	0.810841	1000000	125133	874867	755202	0.863219
21	2000000	358849	1016130	237873	0.806426	1000000	125433	874567	744622	0.851418
22	2000000	438686	998197	214066	0.825474	1000000	112443	887557	769533	0.867024
23	2000000	440145	959963	230235	0.815172	1000000	117222	882778	763561	0.864952
24	2000000	470767	970915	207429	0.824555	1000000	109236	890764	771907	0.866567
25	2000000	413950	968673	229748	0.806185	1000000	124540	875460	748689	0.855195
26	2000000	380879	993435	225879	0.800096	1000000	135580	864420	742308	0.858735
27	2000000	409336	1011286	204935	0.812778	1000000	120628	879372	754879	0.85843
28	2000000	413659	970618	230663	0.80747	1000000	124173	875827	748098	0.854162
29	2000000	478045	956413	219851	0.827155	1000000	110409	889591	770634	0.866279
30	2000000	437710	958018	239748	0.817738	1000000	118710	881290	761144	0.86367
31	2000000	312489	1051366	263548	0.813701	1000000	122244	877756	755487	0.860703
32	2000000	399797	1001191	223652	0.81232	1000000	123119	876881	757219	0.863537
33	2000000	368754	1049749	209490	0.813997	1000000	117756	882244	752613	0.853067
34	2000000	394542	1029862	193241	0.808822	1000000	122578	877422	751466	0.856448
35	2000000	384702	1067284	185431	0.818708	1000000	118692	881308	769257	0.872858
36	2000000	381991	988185	228927	0.799551	1000000	133459	866541	741644	0.855867
37	2000000	447843	909650	263912	0.810702	1000000	123354	876646	751901	0.857702
38	2000000	453436	996709	210853	0.830499	1000000	108077	891923	776872	0.871008
39	2000000	403907	995495	241792	0.820597	1000000	110325	889675	765974	0.860959
40	2000000	383803	1010100	230899	0.812401	1000000	120372	879628	756693	0.860242
41	2000000	406096	998748	211387	0.808115	1000000	128830	871170	747836	0.858427
42	2000000	457064	1002075	188545	0.823842	1000000	112725	887275	767321	0.864806
43	2000000	430717	1028726	196809	0.828126	1000000	112215	887785	771844	0.869404
44	2000000	380624	1031742	210096	0.811231	1000000	127616	872384	753925	0.864212
45	2000000	357076	992491	257128	0.803347	1000000	133320	866680	746209	0.860997
46	2000000	426502	1023330	224662	0.837247	1000000	102559	897441	783008	0.87249
47	2000000	415306	958780	238508	0.806297	1000000	126776	873224	747252	0.855739
48	2000000	395628	988326	244361	0.814157	1000000	117038	882962	759043	0.859655
49	2000000	341453	1062420	232221	0.818047	1000000	111449	888551	761890	0.857452
50	2000000	440861	943720	244218	0.8144	1000000	115427	884573	759220	0.85829
51	2000000	441704	983305	192133	0.808571	1000000	125046	874954	746622	0.853327
52	2000000	410569	962425	242805	0.807899	1000000	121148	878852	756038	0.860256
53	2000000	400208	1018204	211243	0.814828	1000000	116204	883796	757125	0.856674
54	2000000	380140	969012	253479	0.801315	1000000	127149	872851	741262	0.849242
55	2000000	420342	1007343	211307	0.819496	1000000	111686	888314	760531	0.856151
56	2000000	449944	979593	215811	0.822674	1000000	110285	889715	766548	0.861566
57	2000000	393856	1060639	209274	0.831885	1000000	105584	894416	773051	0.864308
58	2000000	368063	1062521	224716	0.82765	1000000	109914	890086	771642	0.86693
59	2000000	382411	1064979	191622	0.819506	1000000	116827	883173	763903	0.864953
60	2000000	394017	992574	235947	0.811269	1000000	125525	874475	755956	0.864468
61	2000000	428393	968451	234017	0.81543	1000000	118337	881663	764065	0.866618
62	2000000	511416	934536	204130	0.825041	1000000	114345	885655	769456	0.868799
63	2000000	323162	1019112	248197	0.795235	1000000	135579	864421	740768	0.856953
64	2000000	447481	936733	230762	0.807488	1000000	128389	871611	750502	0.861052
65	2000000	392007	968324	242245	0.801288	1000000	134449	865551	741701	0.856912
66	2000000	346148	1021575	231422	0.799573	1000000	131985	868015	741648	0.854418
67	2000000	410069	922582	230421	0.781536	1000000	145356	854644	726743	0.850346
68	2000000	432649	952708	224847	0.805102	1000000	127643	872357	746155	0.855332
69	2000000	373656	983368	260897	0.80896	1000000	123233	876767	752501	0.858268
70	2000000	399624	1040903	203423	0.821975	1000000	111537	888463	764341	0.860296
71	2000000	417006	1032484	204127	0.826808	1000000	109917	890083	771243	0.866484
72	2000000	430118	1002137	212012	0.822133	1000000	112350	887650	762566	0.859084
73	2000000	430159	1020881	199634	0.825337	1000000	112182	887818	769105	0.866287
74	2000000	389350	983376	246105	0.809415	1000000	123303	876697	747758	0.852926
75	2000000	485180	968794	207182	0.830578	1000000	109900	890100	775775	0.871559
76	2000000	427825	999602	229448	0.828438	1000000	111263	888737	774365	0.87131
77	2000000	348986	1047405	238092	0.817241	1000000	116034	883966	765873	0.866405
78	2000000	394006	1008216	227993	0.815107	1000000	121700	878300	759260	0.864465
79	2000000	349668	1028294	220179	0.799071	1000000	131302	868698	740049	0.851906
80	2000000	422887	975647	231153	0.814844	1000000	120705	879295	756992	0.860908
81	2000000	404990	998443	222417	0.812925	1000000	118370	881630	756827	0.858441
82	2000000	429214	985137	219765	0.817058	1000000	117530	882470	762085	0.863582
83	2000000	391829	1046567	175777	0.807087	1000000	126408	873592	750864	0.859513
84	2000000	418626	999325	229379	0.823665	1000000	113090	886910	767494	0.865357
85	2000000	412015	977566	239830	0.814705	1000000	120722	879278	759140	0.863367
86	2000000	415146	973912	220785	0.804921	1000000	129121	870879	746698	0.857407
87	2000000	399776	980706	242806	0.811644	1000000	123877	876123	756201	0.863122
88	2000000	372785	1026350	238468	0.818801	1000000	116445	883555	761238	0.861563
89	2000000	436803	988090	225036	0.824964	1000000	111913	888087	770650	0.867764
90	2000000	385299	1018026	238231	0.820778	1000000	111857	888143	763385	0.859529
91	2000000	445759	986738	205512	0.819005	1000000	115580	884420	760721	0.860135
AVERAGE		406612	998798	224167	0.814788	1000000	119647	880353	758153	0.861157
