# Supplementary material for: Combinatorial Pooling Enables Selective Sequencing of the Barley Gene Space
Source: PLoS Comput Biol. 2013 Apr 4;9(4):e1003010. doi: 10.1371/journal.pcbi.1003010 (PMC3617026; doi:10.1371/journal.pcbi.1003010)
Supplement: Dataset S2 — Excel file Dataset_S2 contains the statistics of number of reads and bases at each step of the cleaning process for sets HV3, HV4, HV5 and HV6. (XLS) [file pcbi.1003010.s002.xls]

## Sheet: HV3-multiplex_counts_detail_v19
Lane	Pool	# Seq after Demux	# Seq after QV Trim	# Seq after Adapter	Column E (left+right mate)	# Seq after E. coli	Column H (left+right mate)	% E coli	Total Seq After All Cleaning	Bases after Demux	Bases after QV Trim	Bases after Adapter	Bases after E coli	Total Bases
bac_redo_05	hv3_01	12106029	9989629	9986556		8699970		12.9		1113754668	874272322	873833981	762763229
bac_redo_05	hv3_01	12106029	9654541	9644225	19630781	8402211	17102181	12.9	16345476	1113754668	836447859	835355399	729399297	1434849894
bac_redo_05	hv3_02	14151153	11985266	11957932		11031889		7.7		1301906076	1058239068	1056195093	974880582
bac_redo_05	hv3_02	14151153	11573498	11536858	23494790	10649926	21681815	7.7	20822344	1301906076	1012913095	1009938999	932905193	1841937202
bac_redo_07	hv3_03	11549172	11104731	11099817		10304198		7.2		1062523824	982293864	980400928	910509820
hv3	hv3_03	8981250	7408077	7388511		3825857		48.2		826275000	643721483	641797347	339748575
bac_redo_07	hv3_03	11549172	10564441	10534842		9783826		7.1		1062523824	914091795	910392699	846190194
hv3	hv3_03	8981250	8347453	8327708	37350878	4596669	28510550	44.8	27755942	826275000	741547203	739323600	409482112	2441423730
bac_redo_07	hv3_04	10470513	10119532	10108147		9163928		9.3		963287196	897552434	896051906	812908563
hv3	hv3_04	8557579	4232980	4215124		1066326		74.7		787297268	346384749	344706447	91284513
bac_redo_07	hv3_04	10470513	9652416	9618294		8725089		9.3		963287196	841048614	837729310	760908168
hv3	hv3_04	8557579	7223964	7185207	31126772	3089221	22044564	57	20295723	787297268	622637934	618814179	263806935	1784178875
bac_redo_07	hv3_05	6519940	6323141	6320429		5857432		7.3		599834480	562450695	561769241	520907610
hv3	hv3_05	8316594	6081147	6059593		2477319		59.1		765126648	523716727	521666729	218848164
bac_redo_07	hv3_05	6519940	6077841	6060261		5618404		7.3		599834480	532576753	530688168	492458955
hv3	hv3_05	8316594	7508217	7487189	25927472	3472018	17425173	53.6	16456971	765126648	659520368	657303435	304597174	1456195447
bac_redo_07	hv3_06	10942394	10646616	10627078		9850030		7.3		1006700248	950135246	948292152	879235140
hv3	hv3_06	10047550	5264079	5235033		945961		81.9		924374600	418403309	416070203	78020946
bac_redo_07	hv3_06	10942394	10222891	10178184		9436971		7.3		1006700248	896491310	892545949	828080320
hv3	hv3_06	10047550	9274941	9228726	35269021	3975923	24208885	56.9	21807191	924374600	816668230	812075623	347412993	1925248713
bac_redo_05	hv3_07	6393918	5500838	5497698		5103212		7.2		588240456	484776295	484394667	449916242
bac_redo_05	hv3_07	6393918	5381156	5372894	10870592	4990794	10094006	7.1	9831004	588240456	471952019	471116740	437952251	869250450
bac_redo_07	hv3_08	7991943	7792715	7788568		7213613		7.4		735258756	695975971	695456877	644308828
hv3	hv3_08	6067734	3614870	3603186		723164		79.9		558231528	295201943	294152146	61935712
bac_redo_07	hv3_08	7991943	7490668	7468985		6919626		7.4		735258756	656149665	654163116	606409345
hv3	hv3_08	6067734	5604046	5589719	24450458	2161210	17017613	61.3	15829965	558231528	494785605	493329773	190235021	1399850235
bac_redo_07	hv3_09	11603940	11249911	11243742		8146664		27.5		1067562480	1000656700	998209805	726435764
hv3	hv3_09	5230886	2797846	2781218		601799		78.4		481241512	226094808	224759415	51228167
bac_redo_07	hv3_09	11603940	10734763	10703756		7758432		27.5		1067562480	936662132	932411515	679630183
hv3	hv3_09	5230886	4790376	4772284	29501000	2124882	18631777	55.5	17363668	481241512	419142381	417460842	184643426	1533640736
bac_redo_07	hv3_10	11704678	11185346	11179069		4673226		58.2		1076830376	984267353	981171205	413477179
hv3	hv3_10	5532116	2775167	2769624		608590		78		508954672	220689421	220220278	51182327
bac_redo_07	hv3_10	11704678	10626049	10598088		4423055		58.3		1076830376	916819706	912400413	385453085
hv3	hv3_10	5532116	5053429	5043228	29590009	2366067	12070938	53.1	10683355	508954672	443554597	442462492	206379851	937495375
bac_redo_05	hv3_11	7834257	6680949	6677444		5731395		14.2		720751644	588177949	587554126	505664342
hv3	hv3_11	3980433	2625584	2616579		679460		74		366199836	215849394	215107542	58722438
bac_redo_05	hv3_11	7834257	6530273	6522081		5588954		14.3		720751644	570735938	569676719	489283338
hv3	hv3_11	3980433	3699415	3689085	19505189	1514642	13514451	58.9	12373648	366199836	327283167	326292618	133936133	1093461491
bac_redo_07	hv3_12	7219362	6976235	6973124		5414457		22.4		664181304	620548804	619703449	483413581
hv3	hv3_12	5235766	2212527	2201878		427038		80.6		481690472	175436648	174478091	35514900
bac_redo_07	hv3_12	7219362	6721381	6702220		5199472		22.4		664181304	588922973	586805290	457524537
hv3	hv3_12	5235766	4525370	4509051	20386273	1951858	12992825	56.7	11636540	481690472	389938148	388222567	166352439	1029227800
bac_redo_07	hv3_13	16805627	16156351	16135549		10244527		36.5		1546117684	1432021739	1427682350	914174013
hv3	hv3_13	5485233	2995003	2982186		1518327		49.1		504641436	254111662	252820296	133706718
bac_redo_07	hv3_13	16805627	15502214	15447525		9807369		36.5		1546117684	1349932751	1343247854	860059664
hv3	hv3_13	5485233	5074916	5048647	39613907	2908876	24479099	42.4	23186338	504641436	446791961	444101189	256222154	2052995154
bac_redo_05	hv3_14	8263085	5920431	5916290		4591282		22.4		760203820	514706141	514062719	402193144
hv3	hv3_14	8013152	4607952	4570782		1091608		76.1		737209984	378531814	375438460	94027594
bac_redo_05	hv3_14	8263085	6449855	6440543		4940860		23.3		760203820	558229811	556870093	428769863
hv3	hv3_14	8013152	7303386	7262538	24190153	3168367	13792117	56.4	11340026	737209984	638041763	634003688	275255524	996435208
bac_redo_07	hv3_15	7741305	7442130	7430658		4623594		37.8		712200060	659457255	657503614	412887840
hv3	hv3_15	5689008	2980079	2954859		915081		69		523388736	244785294	242864336	79310938
bac_redo_07	hv3_15	7741305	7232908	7204759		4476770		37.9		712200060	633095847	629904879	394434622
hv3	hv3_15	5689008	5264891	5233349	22823625	2652092	12667537	49.3	11148264	523388736	461589454	458782330	231961579	988147612
bac_redo_05	hv3_16	5697485	4936347	4933703		4138418		16.1		524168620	435321807	434911695	365857532
bac_redo_05	hv3_16	5697485	4807116	4800798	9734501	4024943	8163361	16.2	7840074	524168620	420702422	419943014	352926034	693853026
bac_redo_07	hv3_17	7424170	7053380	7047769		4554705		35.4		683023640	621464453	620037802	405226382
hv3	hv3_17	8916387	5926233	5904976		1849047		68.7		820307604	503962458	501804970	162372660
bac_redo_07	hv3_17	7424170	6806684	6786388		4369213		35.6		683023640	591958382	589447099	382534686
hv3	hv3_17	8916387	8237245	8207802	27946935	3511842	14284807	57.2	12779507	820307604	727524147	724242895	309478288	1130193139
bac_redo_07	hv3_18	7393924	6882752	6878048		4074724		40.8		680241008	602506041	601471595	361243333
hv3	hv3_18	9106249	5610564	5595086		2480470		55.7		837774908	479025054	477253561	218703935
bac_redo_07	hv3_18	7393924	6660856	6640843		3917808		41		680241008	578592161	576391094	342977861
hv3	hv3_18	9106249	8346076	8315006	27428983	4463791	14936793	46.3	13107560	837774908	736497295	733039840	393740717	1159565856
bac_redo_07	hv3_19	10732894	10323482	10319263		6365672		38.3		987426248	914631726	911721561	566790244
hv3	hv3_19	5903962	3885897	3879194		1248049		67.8		543164504	327596458	326164450	109270989
bac_redo_07	hv3_19	10732894	9950294	9923183		6119837		38.3		987426248	868553316	864076425	536884575
hv3	hv3_19	5903962	5511793	5502719	29624359	2527054	16260612	54.1	15199926	543164504	489184492	486895984	223394785	1344550680
bac_redo_05	hv3_20	6942747	5800055	5797950		4870241		16		638732724	509450097	509133171	428898037
hv3	hv3_20	5756581	3479527	3458751		545624		84.2		529605452	288770409	286859132	46598908
bac_redo_05	hv3_20	6942747	5643317	5636989		4734780		16		638732724	492525978	491827257	414245544
hv3	hv3_20	5756581	5329944	5307066	20200756	1915159	12065804	63.9	10631719	529605452	470134605	467608190	167925952	937470218
bac_redo_05	hv3_21	6457300	5269027	5266018		4456012		15.4		594071600	462906417	462324776	392578051
hv3	hv3_21	7369389	4994446	4245706		1180700		72.2		677983788	415995612	357975734	103234574
bac_redo_05	hv3_21	6457300	5250301	5241703		4387358		16.3		594071600	457024329	455886925	382835608
hv3	hv3_21	7369389	6819230	6100634	20854061	2535033	12559103	58.4	11150885	677983788	598527711	532546108	221339903	983702494
bac_redo_05	hv3_22	8717434	7301652	7296135		6271753		14		802003928	641371866	640502851	551927161
hv3	hv3_22	7152429	2837440	2451788		399157		83.7		658023468	221998740	193416186	32742549
bac_redo_05	hv3_22	8717434	7031828	7020916		6028790		14.1		802003928	611470056	610083111	525221249
hv3	hv3_22	7152429	5949687	5466661	22235500	2362211	15061911	56.8	13064836	658023468	504984559	460226882	196702126	1147123103
bac_redo_05	hv3_23	7869916	6763948	6756766		5955735		11.9		724032272	595937187	594777597	525258667
hv3	hv3_23	3194894	1794342	1527121		390814		74.4		293930248	147805029	127227390	33648338
bac_redo_05	hv3_23	7869916	6603002	6589497		5806411		11.9		724032272	577979954	576221511	508852947
hv3	hv3_23	3194894	2794827	2555599		1049229		58.9		293930248	239266530	217292993	88340780
vu1_s6_1	hv3_23	9220637	7570911	7546194		2272157		69.9		848298604	662522593	658750369	200707434
vu1_s6_2	hv3_23	9220637	7472298	7453175	32428352	2317095	17791441	68.9	16614628	848298604	651276324	647959134	203504556	1468154997
bac_redo_07	hv3_24	7288733	6939733	6936586		4283838		38.2		670563436	609634988	608001277	378402593
hv3	hv3_24	7091277	4038113	3451884		918010		73.4		652397484	329311049	284473030	78931106
bac_redo_07	hv3_24	7288733	6616019	6599366		4069187		38.3		670563436	569807629	567332424	353212857
hv3	hv3_24	7091277	6516755	5856194	22844030	2756391	12027426	52.9	10537019	652397484	567939727	506814020	237735712	922662214
bac_redo_07	hv3_25	9639605	9258087	9251996		4368987		52.8		886843660	817086485	814134732	387272297
hv3	hv3_25	6405307	3984946	3388850		963438		71.6		589288244	329961666	284047012	84135652
bac_redo_07	hv3_25	9639605	8790241	8765213		4133558		52.8		886843660	759308388	755202693	360300010
hv3	hv3_25	6405307	5873841	5285068	26691127	2316473	11782456	56.2	10645642	589288244	512769318	458801563	200901039	936371706
bac_redo_07	hv3_26	9944472	9561869	9557229		6629175		30.6		914891424	846686404	845519854	590296325
hv3	hv3_26	5750527	3614073	3055605		1073990		64.9		529048484	302883689	259387222	94355737
bac_redo_07	hv3_26	9944472	9160327	9135637		6343503		30.6		914891424	796397634	793704932	555586045
hv3	hv3_26	5750527	5270609	4744646	26493117	2343541	16390209	50.6	15320208	529048484	457426830	409270281	201621655	1353034508
bac_redo_05	hv3_27	11471850	9331750	9328302		7548128		19.1		1055410200	818871840	818061788	664556536
bac_redo_05	hv3_27	11471850	9087922	9077182	18405484	7310887	14859015	19.5	14434661	1055410200	789546988	788096823	637013870	1270955197
bac_redo_08	hv3_28	12755203	12330670	12323364		7449415		39.6		1173478676	1099159755	1095699999	668335164
hv3	hv3_28	10926223	5284369	4545006		982687		78.4		1005212516	420030075	365024673	82857999
bac_redo_08	hv3_28	12755203	12043969	12013163		7257811		39.6		1173478676	1061205777	1056209899	643091907
hv3	hv3_28	10926223	9834383	8899534	37781067	4284151	19974064	51.9	17330728	1005212516	852128738	766369843	366563943	1539175826
bac_redo_08	hv3_29	5106431	4957379	4951113		2519504		49.1		469791652	441897121	440415528	226500485
hv3	hv3_29	5191605	2770824	2371240		496153		79.1		477627660	221627493	191698217	42110705
bac_redo_08	hv3_29	5106431	4784118	4768625		2437642		48.9		469791652	423099878	420985748	216798329
hv3	hv3_29	5191605	4799340	4307399	16398377	1971720	7425019	54.2	6215028	477627660	419579269	374371027	170807068	552833355
bac_redo_08	hv3_30	7289175	6966528	6958192		1567979		77.5		670604100	616776605	612455655	137871855
hv3	hv3_30	5177904	2463037	2115281		448095		78.8		476367168	194731578	169167713	37805071
bac_redo_08	hv3_30	7289175	6902322	6880387		1603368		76.7		670604100	609305469	604225217	140593846
hv3	hv3_30	5177904	4443543	4110415	20064275	1653151	5272593	59.8	4239561	476367168	376601944	346377805	138104745	370359680
bac_redo_05	hv3_31	6850781	4980918	4978245		4041428		18.8		630271852	435448098	435097017	355729178
bac_redo_05	hv3_31	6850781	5419390	5411237	10389482	4275686	8317114	21	7646645	630271852	469513787	468620412	372029694	675020876
bac_redo_08	hv3_32	6726905	6560581	6553544		3237878		50.6		618875260	587380261	585760590	291557353
bac_redo_08	hv3_32	6726905	6359729	6339761		3141581		50.4		618875260	563173096	560614774	279871293
hv4_s5_1	hv3_32	8883940	7742686	7739957		6514793		15.8		817322480	687174290	686229398	580882247
hv4_s5_2	hv3_32	8883940	8117698	8107439	28740701	6770814	19665066	16.5	19416848	817322480	716515013	714634523	599013037	1731461143
bac_redo_08	hv3_33	6855880	6649997	6646418		4775719		28.1		630740960	594686418	593924008	430165397
hv3	hv3_33	8903924	5173199	4379602		891360		79.6		819161008	437320088	375578628	77844945
bac_redo_08	hv3_33	6855880	6491379	6474314		4643362		28.3		630740960	576185142	574344712	413391749
hv3	hv3_33	8903924	8153003	7340759	24841093	2821609	13132050	61.6	11370121	819161008	708444329	634470408	242079825	1015419303
bac_redo_08	hv3_34	5787840	5553672	5546443		2881433		48		532481280	491902116	490022156	258320354
bac_redo_08	hv3_34	5787840	5440023	5421995	10968438	2827385	5708818	47.9	5708818	532481280	481654959	479005932	251193971	509514325
bac_redo_08	hv3_35	6325147	6145343	6140616		4187756		31.8		581913524	549105489	548079822	376473413
bac_redo_08	hv3_35	6325147	5922174	5905358	12045974	4026515	8214271	31.8	8214271	581913524	524402333	522441930	358191089	734664502
bac_redo_08	hv3_36	5587835	5413388	5407312		4060589		24.9		514080820	484890337	483981068	366477379
bac_redo_08	hv3_36	5587835	5322276	5304487	10711799	3963685	8024274	25.3	8024274	514080820	474732460	472862406	354764571	721241950
bac_redo_08	hv3_37	8623252	8347972	8330654		5691376		31.7		793339184	745346433	741068169	511288909
hv3	hv3_37	7315643	4448236	3766602		810359		78.5		673039156	368333358	316033620	70366719
bac_redo_08	hv3_37	8623252	8163967	8130304		5548186		31.8		793339184	724391987	719086135	493344909
hv3	hv3_37	7315643	6713154	6058272	26285832	2479793	14529714	59.1	13127308	673039156	582176896	522471533	212613856	1170384765
bac_redo_08	hv3_38	6862185	6731571	6721143		5443650		19		631321020	605690384	604430905	491433265
hv3	hv3_38	7662944	5610521	4730367		2455262		48.1		704990848	480654914	410792576	218496926
bac_redo_08	hv3_38	6862185	6552274	6527442		5281687		19.1		631321020	584696189	582246147	472386388
hv3	hv3_38	7662944	7166573	6387251	24366203	3625506	16806105	43.2	15781785	704990848	630075565	558626070	318119346	1414332949
bac_redo_08	hv3_39	7078118	6837263	6829669		4104392		39.9		651186856	609032324	606714341	368634174
hv3	hv3_39	4773679	3229259	2740124		909461		66.8		439178468	270556135	232666551	80061551
bac_redo_08	hv3_39	7078118	6677265	6656024		3984849		40.1		651186856	591046804	587793574	353979435
hv3	hv3_39	4773679	4393961	3952620	20178437	1705230	10703932	56.9	10028266	439178468	383724701	343371276	148297385	894050620
bac_redo_08	hv3_40	5523842	5310507	5303312		2674155		49.6		508193464	472665849	470698439	239938088
hv3	hv3_40	6230915	3123690	2665633		589904		77.9		573244180	256210182	221229126	50586967
bac_redo_08	hv3_40	5523842	5183925	5165975		2602654		49.6		508193464	457992399	455332874	231242087
hv3	hv3_40	6230915	5637505	5094323	18229243	2277786	8144499	55.3	6663494	573244180	487945122	438368258	194991047	592273593
bac_redo_08	hv3_41	10595200	10171292	10165596		3690318		63.7		974758400	903054469	898819951	329377042
bac_redo_08	hv3_41	10595200	10023126	9996768	20162364	3664589	7354907	63.3	7354907	974758400	887381732	881830333	324745846	654122888
bac_redo_08	hv3_42	6893185	6602932	6596227		3918204		40.6		634173020	585829368	584537368	352546802
hv3	hv3_42	12988077	8769844	7465225		1614899		78.4		1194903084	730964998	630161284	140677209
bac_redo_08	hv3_42	6893185	6519319	6499901		3861907		40.6		634173020	577311327	575047130	343851889
hv3	hv3_42	12988077	11971112	10722101	31283454	3995946	13390956	62.7	11454737	1194903084	1050438527	935280937	347983541	1020435815
bac_redo_08	hv3_43	9910886	9702366	9693099		6276948		35.2		911801512	871662903	869711280	566932324
hv3	hv3_43	9459825	6117688	5203402		1426693		72.6		870303900	507766781	437619792	124868968
bac_redo_08	hv3_43	9910886	9406561	9377227		6074077		35.2		911801512	836705699	833205787	542714276
hv3	hv3_43	9459825	8650113	7794337	32068065	3208951	16986669	58.8	15463247	870303900	753810326	675538345	278168807	1383862735
bac_redo_08	hv3_44	12016861	11673470	11659785		6887211		40.9		1105551212	1044615833	1041115999	620588545
hv3	hv3_44	4391256	2962132	2948690		975337		66.9		403995552	250569892	249438013	85797909
bac_redo_08	hv3_44	12016861	11406495	11369549		6714218		40.9		1105551212	1011418130	1006326933	598475542
hv3	hv3_44	4391256	4096066	4081398	30059422	1813938	16390704	55.6	15643169	403995552	363286151	361882836	160896144	1400970024
bac_redo_09	hv3_45	13285542	12625420	12618053		8140111		35.5		1222269864	1119729483	1117260625	726769034
hv3	hv3_45	10253106	4200889	4186606		807850		80.7		943285752	338773888	337497685	68022953
bac_redo_09	hv3_45	13285542	12117264	12095589		7801618		35.5		1222269864	1058318785	1055323152	686206645
hv3	hv3_45	10253106	8526307	8493481	37393729	3742433	20492012	55.9	17904411	943285752	733775044	730579321	318169848	1584032769
bac_redo_09	hv3_46	13344296	12981901	12969088		9824674		24.2		1227675232	1163849997	1160691132	882243212
hv3	hv3_46	7468839	4161197	4134081		935271		77.4		687133188	347972084	345834056	80248596
bac_redo_09	hv3_46	13344296	12369954	12344125		9359855		24.2		1227675232	1092464447	1088883460	828881947
hv3	hv3_46	7468839	6548280	6520188	35967482	2525561	22645361	61.3	21154965	687133188	567548951	565076032	215906622	1883235239
bac_redo_09	hv3_47	5910909	5577626	5572456		3707619		33.5		543803628	494970987	493933156	331993624
bac_redo_09	hv3_47	5910909	5467539	5455918	11028374	3628261	7335880	33.5	7335880	543803628	483149567	481754155	322018253	654011877
bac_redo_09	hv3_48	7927779	7601126	7592841		4917519		35.2		729355668	677447382	675808926	441541424
hv3	hv3_48	5374997	2920346	2911096		785459		73		494499724	239575518	238744178	67541557
bac_redo_09	hv3_48	7927779	7316267	7300113		4732205		35.2		729355668	645781281	643838157	419799481
hv3	hv3_48	5374997	4981140	4965520	22769570	2375450	12810633	52.2	11489323	494499724	439331514	437575341	208453042	1023416351
bac_redo_09	hv3_49	5595090	5160805	5156439		2623215		49.1		514748280	453622779	452835713	233803783
hv3	hv3_49	7961486	4584056	4562508		858814		81.2		732456712	380467610	378558575	73886108
bac_redo_09	hv3_49	5595090	5086350	5076722		2611605		48.6		514748280	445705547	444624899	230271366
hv3	hv3_49	7961486	7297016	7270176	22065845	2850909	8944543	60.8	7206008	732456712	642948537	640160651	249965931	637683740
bac_redo_06	hv3_50	11189735	9127838	9123565		6070130		33.5		1029455620	797584125	795434370	532640202
hv3	hv3_50	5687862	2957856	2928624		618227		78.9		523283304	244412463	242076429	52826479
bac_redo_06	hv3_50	11189735	9066288	9052777		6030164		33.4		1029455620	785312457	782403536	524459217
hv3	hv3_50	5687862	5160321	5129015	26233981	2349995	15068516	54.2	12997843	523283304	449620933	446668156	203162233	1142290400
bac_redo_09	hv3_51	11311177	10986940	10980256		8383714		23.6		1040628284	984355726	982664424	752932301
hv3	hv3_51	5919059	2770365	2762364		568987		79.4		544553428	222579373	221793411	47759219
bac_redo_09	hv3_51	11311177	10387963	10367608		7923591		23.6		1040628284	916683057	914212175	701244263
hv3	hv3_51	5919059	5362994	5349152	29459380	2566699	19442991	52	17774853	544553428	469550396	467791253	222895024	1582163950
bac_redo_09	hv3_52	7620354	7313191	7308943		5676967		22.3		701072568	650951786	650009930	507113406
hv3	hv3_52	5894213	3597600	3581096		713836		80.1		542267596	300050019	298432519	61270914
bac_redo_09	hv3_52	7620354	6970612	6957589		5402793		22.3		701072568	613060588	611611678	476809173
hv3	hv3_52	5894213	5442829	5424492	23272120	2204925	13998521	59.4	12750269	542267596	481170049	479037572	194059293	1130893444
bac_redo_09	hv3_53	7895582	7632151	7626921		6342698		16.8		726393544	683593309	682668625	569594361
bac_redo_09	hv3_53	7895582	7368326	7353413	14980334	6106520	12449218	17	12449218	726393544	653459014	651923477	542942623	1112536984
bac_redo_06	hv3_54	13396588	11499934	11485042		9582207		16.6		1232486096	1017629111	1014816134	848403604
bac_redo_06	hv3_54	13396588	11206446	11181859	22666901	9346020	18928227	16.4	18289327	1232486096	984033851	980514039	821173274	1621001718
bac_redo_09	hv3_55	15002201	14513394	14499768		11615577		19.9		1380202492	1297571677	1294670886	1040538091
hv3	hv3_55	6898454	4210541	4195973		1761632		58		634657768	354317670	352970591	154170233
bac_redo_09	hv3_55	15002201	13975409	13945540		11176630		19.9		1380202492	1235282289	1231638133	990881174
hv3	hv3_55	6898454	6007782	5989181	38630462	2918228	27472067	51.3	26346121	634657768	521335255	519445422	253118099	2345573938
bac_redo_06	hv3_56	7549663	6089196	6086010		4686518		23		694568996	535233933	534402358	413989122
hv3	hv3_56	8494093	3917969	3898639		1197858		69.3		781456556	326063919	324388917	104125838
bac_redo_06	hv3_56	7549663	6391448	6381184		4893554		23.3		694568996	560703576	559130176	430337229
hv3	hv3_56	8494093	7792504	7756663	24122496	3674927	14452857	52.6	11717538	781456556	685114338	681802793	322382377	1038914676
bac_redo_09	hv3_57	8489852	8136140	8119728		6064375		25.3		781066384	725373021	723552900	544295640
bac_redo_09	hv3_57	8489852	7925094	7903689	16023417	5887831	11952206	25.5	11952206	781066384	701818921	699756809	523522904	1067818544
bac_redo_06	hv3_58	5402917	4568547	4562319		3735438		18.1		497068364	401830837	400919255	329534066
hv3	hv3_58	6157345	3853835	3826747		1421137		62.9		566475740	326555047	324117982	125142799
bac_redo_06	hv3_58	5402917	4559066	4548715		3716212		18.3		497068364	399044220	397756553	325936843
hv3	hv3_58	6157345	5696103	5667956	18605737	2839895	11712682	49.9	10194616	566475740	501496201	498482676	249545164	903192125
bac_redo_09	hv3_59	13286718	12832000	12824461		10384745		19		1222378056	1146174622	1144195000	929667985
bac_redo_09	hv3_59	13286718	12312928	12288235	25112696	9944159	20328904	19.1	20328904	1222378056	1086473092	1083530938	879660913	1809328898
bac_redo_09	hv3_60	9830359	9437579	9431412		7524670		20.2		904393028	844185907	842950766	675772117
hv3	hv3_60	6616433	3453811	3428039		1020155		70.2		608711836	285213192	283047168	88583942
bac_redo_09	hv3_60	9830359	9110939	9092088		7240952		20.4		904393028	807471971	805466247	643786199
hv3	hv3_60	6616433	6151114	6121325	28072864	2981259	18767036	51.3	17004408	608711836	541465221	538527316	261731465	1517617138
bac_redo_06	hv3_61	5340133	4364254	4361763		3295197		24.5		491292236	383246884	382598093	290562458
bac_redo_06	hv3_61	5340133	4464583	4457988	8819751	3357645	6652842	24.7	6372913	491292236	389931558	388864375	293878280	563284982
bac_redo_09	hv3_62	6296926	6034249	6025171		5179434		14		579317192	538988595	537712299	464404096
hv3	hv3_62	9642288	6844936	6821859		3225165		52.7		887090496	591688154	589265065	286094439
bac_redo_09	hv3_62	6296926	5861028	5847421		5011957		14.3		579317192	519831120	518305098	444920546
hv3	hv3_62	9642288	8903042	8876544	27570995	4714447	18131003	46.9	16660706	887090496	788887809	785887395	418094796	1487390350
bac_redo_09	hv3_63	9250945	8999155	8993346		7420079		17.5		851086940	807739578	806599714	667442084
hv3	hv3_63	5258942	2286234	2276091		453919		80.1		483822664	188233573	187255576	38570410
bac_redo_09	hv3_63	9250945	8626608	8610360		7101027		17.5		851086940	762694155	760924990	629346059
hv3	hv3_63	5258942	4778071	4751629	24631426	2205182	17180207	53.6	15584438	483822664	418559618	415833780	191859243	1389937411
bac_redo_09	hv3_64	7792966	7598244	7590451		6338179		16.5		716952872	683150660	681934272	571016641
hv3	hv3_64	7615057	4305198	4295013		609206		85.8		700585244	356116250	354904493	51600849
bac_redo_09	hv3_64	7792966	7240687	7224427		6032495		16.5		716952872	641551311	639864488	535771269
hv3	hv3_64	7615057	7040168	7025512	26135403	2758103	15737983	60.7	13941128	700585244	622272616	619999812	242012740	1244647146
bac_redo_09	hv3_65	12997529	12665768	12655016		10370816		18		1195772668	1138477998	1136534120	933942216
bac_redo_09	hv3_65	12997529	12163483	12138167	24793183	9950818	20321634	18	20321634	1195772668	1077444230	1074685201	883963938	1817906154
bac_redo_10	hv3_66	10094879	9723301	9718499		8474141		12.8		928728868	866696182	864951310	755728992
hv3	hv3_66	8353374	4716119	4681347		819198		82.5		768510408	391640619	388939619	70663187
bac_redo_10	hv3_66	10094879	9369670	9351517		8154155		12.8		928728868	821659392	819207190	716107436
hv3	hv3_66	8353374	7634906	7591428	31342791	2939278	20386772	61.3	18485815	768510408	671012506	666916398	256974848	1635451095
bac_redo_04	hv3_67	4687767	3269655	3262330		909057		72.1		431274564	270965348	269391558	78599307
bac_redo_10	hv3_67	10036800	9699329	9691475		7280180		24.9		923385600	865189027	863768183	650744341
bac_redo_04	hv3_67	5353404	4986341	4967784		2278442		54.1		492513168	438113106	435089004	199035061
bac_redo_10	hv3_67	10036800	9339227	9318759	27240348	7004847	17472526	24.8	16328386	923385600	821546685	819354696	618511082	1448701898
bac_redo_04	hv3_68	5038349	2340320	2334814		393087		83.2		463528108	187350049	186567064	32643752
bac_redo_10	hv3_68	6027968	5833835	5829420		4873840		16.4		554573056	522110781	521424620	437355788
bac_redo_04	hv3_68	6031957	4930529	4910876		2217272		54.8		554940044	420289429	418027314	186271574
bac_redo_10	hv3_68	6027968	5695127	5682337	18757447	4748173	12232372	16.4	10703236	554573056	505375562	504075167	422279486	952890634
bac_redo_04	hv3_69	2660924	1598814	1594118		291127		81.7		244805008	130353604	129697600	24301249
bac_redo_06	hv3_69	5784829	5018604	5012777		4208027		16.1		532204268	442389315	441518653	371620956
bac_redo_04	hv3_69	2883710	2464207	2453830		1003608		59.1		265301320	209755519	208602341	83797188
bac_redo_06	hv3_69	5784829	4896400	4886685	13947410	4101122	9603884	16.1	8684816	532204268	428786169	427551997	359602537	765922577
bac_redo_04	hv3_70	3910549	2388633	2385223		688097		71.2		359770508	194626362	194197415	59301191
bac_redo_10	hv3_70	11673977	11402734	11392963		9616148		15.6		1074005884	1025609225	1023832012	865718642
bac_redo_04	hv3_70	3574993	3331387	3323201		1645927		50.5		328899356	292272649	291317595	143734445
bac_redo_10	hv3_70	11673977	11032720	11006442	28107829	9294013	21244185	15.6	20398639	1074005884	979805739	976941874	826886264	1823353766
bac_redo_06	hv3_71	4662869	3973177	3971398		3069758		22.7		428983948	349806599	349465010	271046560
bac_redo_06	hv3_71	4662869	3864025	3858816	7830214	2984437	6054195	22.7	5865792	428983948	338188405	337556582	261945199	519003168
bac_redo_04	hv3_72	4965786	3468329	3461568		781577		77.4		456852312	292200106	291285501	67856995
bac_redo_06	hv3_72	4608167	3851426	3849281		3214843		16.5		423951364	340430832	340146931	285075371
bac_redo_04	hv3_72	5570746	5142123	5126226		2093274		59.2		512508632	450166099	448379457	182280573
bac_redo_06	hv3_72	4608167	3886016	3879264	16316339	3207762	9297456	17.3	7932764	423951364	340734859	340054386	282106227	703327676
bac_redo_10	hv3_73	4123148	4021606	4018665		3353747		16.5		379329616	361032297	360609604	301574770
bac_redo_10	hv3_73	4123148	3888552	3879998		3238265		16.5		379329616	343997072	343167050	287075045
hv4_s6_1	hv3_73	6575888	6018838	6013469		5047195		16.1		604981696	536177908	535452363	451379490
hv4_s6_2	hv3_73	6713704	6213230	6206746	20118878	5191883	16831090	16.4	16693209	617660768	549078409	548113323	460121224	1489218323
bac_redo_04	hv3_74	3913005	2482771	2475989		445824		82		359996460	206510845	205457776	37917440
bac_redo_06	hv3_74	6710013	5704032	5698777		3746867		34.3		617321196	502169156	501279036	331458001
bac_redo_04	hv3_74	3794021	3458588	3437059		1465802		57.4		349049932	299684325	297317352	125614235
bac_redo_06	hv3_74	6710013	5605963	5595702	17207527	3692281	9350774	34	8223578	617321196	489255483	487940793	323708487	726431165
bac_redo_04	hv3_75	5188665	2990859	2986369		694683		76.7		477357180	241901610	241374285	59281118
bac_redo_10	hv3_75	6989659	6843588	6839480		5847008		14.5		643048628	616009698	615036209	526494076
bac_redo_04	hv3_75	6010364	5429916	5418677		2617551		51.7		552953488	472756915	471278940	226167440
bac_redo_10	hv3_75	6989659	6584574	6569924	21814450	5618589	14777831	14.5	13257823	643048628	583973547	582297832	498925360	1182215164
bac_redo_04	hv3_76	5513637	3793655	3786533		586071		84.5		507254604	310292167	309332159	49232934
bac_redo_10	hv3_76	6261781	6078435	6075040		4893066		19.5		576083852	543448081	542752210	438291318
bac_redo_04	hv3_76	6206252	5773766	5753391		2157918		62.5		570975184	506487775	504032389	188020037
bac_redo_10	hv3_76	6261781	5856184	5844011	21458975	4707277	12344332	19.5	11093063	576083852	516922589	515633160	416651573	984606302
bac_redo_04	hv3_77	9733086	6601224	6587225		1495790		77.3		895443912	541534924	540163654	127966958
bac_redo_06	hv3_77	5400961	4638195	4633755		3352518		27.7		496888412	408845606	407953690	296654516
bac_redo_04	hv3_77	11780069	9872842	9827240		3805386		61.3		1083766348	840730146	836653667	320533521
bac_redo_06	hv3_77	5400961	4633094	4623975	25672195	3348339	12002033	27.6	9776287	496888412	406300982	405004723	294700727	860774440
bac_redo_04	hv3_78	7303120	4948080	4936801		1573420		68.1		671887040	418974194	417484471	137763414
bac_redo_06	hv3_78	7477903	6270750	6267629		4910109		21.7		687967076	552536913	551265537	433545994
bac_redo_04	hv3_78	8745203	8061487	8018380		3546487		55.8		804558676	705898408	701643797	309763400
bac_redo_06	hv3_78	7477903	6199401	6190108	25412918	4842079	14872095	21.8	12809871	687967076	542117268	540353028	424260303	1132765095
bac_redo_04	hv3_79	6602115	4840673	4826070		1679143		65.2		607394580	407854234	405924951	147384338
bac_redo_10	hv3_79	7034313	6849656	6844817		5836277		14.7		647156796	615327104	614464956	525298144
bac_redo_04	hv3_79	7789068	7176732	7135381		3493110		51		716594256	625318986	620799025	303329703
bac_redo_10	hv3_79	7034313	6665132	6649595	25455863	5664272	16672802	14.8	15090524	647156796	592382196	590777231	504523218	1347143564
bac_redo_04	hv3_80	5885836	4347782	4321196		1141976		73.6		541496912	368483433	365958523	99953175
bac_redo_06	hv3_80	5845715	4991375	4989179		4328898		13.2		537805780	440587521	440067948	382806539
bac_redo_04	hv3_80	6916015	6433828	6385796		2716773		57.5		636273380	563368171	558750763	236953973
bac_redo_06	hv3_80	5845715	4955055	4946955	20643126	4268742	12456389	13.7	10712779	537805780	434456014	433390930	374905152	948949987
bac_redo_06	hv3_81	10347457	8215261	8211562		5634078		31.4		951966044	718569289	716249757	494598097
bac_redo_06	hv3_81	10347457	8307886	8296696		5699714		31.3		951966044	724144923	721127259	497517492
hv4_s8_1	hv3_81	3649090	1380898	1379745		510098		63		335716280	119316241	119177015	45314895
hv4_s8_2	hv3_81	4648997	4021035	4007988	21895991	2226819	14070709	44.4	12338501	427707724	342218073	340844712	188451078	1086613667
bac_redo_10	hv3_82	12920139	12528922	12503955		9131163		27		1188652788	1121654229	1112796646	816646307
bac_redo_10	hv3_82	12920139	12186056	12148328	24652283	8869311	18000474	27	18000474	1188652788	1076927624	1068845119	784597802	1601244109
bac_redo_10	hv3_83	7305322	7102321	7072890		5522461		21.9		672089624	636741560	633592169	496821363
bac_redo_10	hv3_83	7305322	6944210	6913948	13986838	5397014	10919475	21.9	10919475	672089624	616874688	613820123	480967340	977788703
bac_redo_06	hv3_84	8972347	7546344	7541694		5801268		23.1		825455924	664173659	662849970	511988576
bac_redo_06	hv3_84	8972347	7413635	7403287	14944981	5685404	11486672	23.2	11046283	825455924	646369525	644554823	496779386	975421682
bac_redo_10	hv3_85	11624490	11303059	11293950		8974079		20.5		1069453080	1013090887	1009888921	804882140
bac_redo_10	hv3_85	11624490	10939170	10912897	22206847	8670481	17644560	20.5	17644560	1069453080	967277069	963324710	767916285	1572798425
bac_redo_10	hv3_86	7954557	7621219	7615037		6468068		15.1		731819244	680157308	678508717	578784134
bac_redo_10	hv3_86	7954557	7395848	7378262	14993299	6250329	12718397	15.3	12718397	731819244	654619010	652337536	553879623	1132663757
bac_redo_10	hv3_87	13068882	12727846	12720972		10593147		16.7		1202337144	1142916113	1140221363	951982256
bac_redo_10	hv3_87	13068882	12308967	12281848	25002820	10223452	20816599	16.8	20816599	1202337144	1091457603	1087589786	907411289	1859393545
bac_redo_06	hv3_88	7188493	6335522	6332016		4641872		26.7		661341356	561438658	560694639	412630955
bac_redo_06	hv3_88	7188493	6145033	6136158	12468174	4508439	9150311	26.5	8863418	661341356	539476120	538298278	397132920	787783251
bac_redo_10	hv3_89	10656703	10241913	10233887		7181340		29.8		980416676	911554793	908414891	641063945
bac_redo_10	hv3_89	10656703	9883425	9862363	20096250	6918691	14100031	29.8	14100031	980416676	866546670	863095894	609567598	1250631543
bac_redo_06	hv3_90	9283084	7857993	7853038		5352535		31.8		854043728	692746928	690831146	473746909
bac_redo_06	hv3_90	9283084	7733201	7721792	15574830	5280051	10632586	31.6	10216775	854043728	675084098	672761504	462853649	905069274
bac_redo_10	hv3_91	10007684	9710260	9702490		7814152		19.5		920706928	868979808	867057157	700015620
bac_redo_10	hv3_91	10007684	9297484	9276388	18978878	7474422	15288574	19.4	15288574	920706928	819603384	816990993	660679108	1360694728
	TOTAL	2459551112	2112389883		2087675998		1327709671		1229672705	226278702304	184989603387	182689589104	117303953489	109099834781
	AVERAGE	7.93404e+06	6.81416e+06		2.29415e+07		1.45902e+07	41.1332	1.35129e+07	7.29931e+08	5.96741e+08	5.89321e+08	3.784e+08	1.1989e+09
	MIN	2660924	1380898		7830214		5272593	7.1	4239561	244805008	119316241	119177015	24301249	370359680
	MAX	16805627	16156351		39613907		28510550	85.8	27755942	1546117684	1432021739	1427682350	1040538091	2441423730
	read length									92	87.5736	87.5086	88.3506	88.7227
														381.468

## Sheet: HV4-multiplex_counts_detail_v14
Lane	Pool	# Seq after Demultiplex	Bases after Demultiplex	# Seq after Quality Trim	Bases after Quality Trim	# Seq after Adapter removal	Column G (left+right mate)	Bases after Adapter Removal	Column I (left+right mate)	# Seq after E coli removal	Column K (left+right mate)	Bases after E coli removal	Column M (left+right mate)	% E coli
hv4_s1_1	hv4_01	4116500	374601500	3628102	302004270	3276632		282131796		2267984		197241610		30.8
hv4_s1_2	hv4_01	4242811	386095801	3859610	325080660	3439716	6716348	296183771	578315567	2398849	4666833	208020591	405262201	30.3
hv4_s1_1	hv4_02	4921647	447869877	4001425	333411841	3966542		331084792		2878722		243389882		27.4
hv4_s1_2	hv4_02	5068727	461254157	4198674	349578590	4000158	7966700	335358336	666443128	2903176	5781898	245865288	489255170	27.4
hv4_s1_1	hv4_03	5720162	520534742	5116328	424856170	4650461		397984058		3092313		267173927		33.5
hv4_s1_2	hv4_03	5788485	526752135	5164076	431315352	4592330	9242791	391891897	789875955	3065186	6157499	263606787	530780714	33.3
hv4_s1_1	hv4_04	5238611	476713601	4543945	383152572	4339928		372871043		2817862		244814543		35.1
hv4_s1_2	hv4_04	5346397	486522127	4832332	409341815	4459594	8799522	383849678	756720721	2919575	5737437	253530958	498345501	34.5
hv4_s1_1	hv4_05	5927075	539363825	5270306	448847680	5065265		436041636		3350480		291465399		33.9
hv4_s1_2	hv4_05	6022624	548058784	5434719	464159069	5206797	10272062	447292046	883333682	3477281	6827761	301139361	592604760	33.2
hv4_s1_1	hv4_06	6244172	568219652	5422190	430823483	4354315		370852931		2166582		187281441		50.2
hv4_s1_2	hv4_06	6332192	576229472	5567991	452569856	4387380	8741695	373372481	744225412	2233683	4400265	192062217	379343658	49.1
hv4_s1_1	hv4_07	6389671	581460061	5560605	463258979	5079320		434662260		3520887		304438649		30.7
hv4_s1_2	hv4_07	6508154	592242014	5765616	484867972	5260831	10340151	450503106	885165366	3663552	7184439	316151782	620590431	30.4
hv4_s1_1	hv4_08	4930286	448656026	4452611	378258715	4283695		367792112		2332223		202959441		45.6
hv4_s1_2	hv4_08	4995381	454579671	4573847	390811283	4390366	8674061	377751175	745543287	2428725	4760948	211091477	414050918	44.7
hv4_s1_1	hv4_09	4921369	447844579	4315846	363161885	4127101		352932122		2827590		244299826		31.5
hv4_s1_2	hv4_09	5051645	459699695	4458492	377180809	4171835	8298936	356941026	709873148	2866642	5694232	247332690	491632516	31.3
hv4_s1_1	hv4_10	3077729	280073339	2519360	214173223	2498901		212661760		1568923		134916183		37.2
hv4_s1_2	hv4_10	3297402	300063582	2888098	242506581	2682062	5180963	227677498	440339258	1700025	3268948	145466601	280382784	36.6
hv4_s1_1	hv4_11	4572518	416099138	3827350	313337315	3437585		292528197		2190192		188665516		36.3
hv4_s1_2	hv4_11	4787232	435638112	4118065	339826765	3590736	7028321	303392854	595921051	2327285	4517477	198284028	386949544	35.2
hv4_s1_1	hv4_12	5538319	503987029	4483653	378744080	4338857		370733844		2669285		231447860		38.5
hv4_s1_2	hv4_12	6011446	547041586	5212702	439307442	4968675	9307532	421152456	791886300	3153743	5823028	269453969	500901829	36.5
hv4_s2_1	hv4_13	2856149	262765708	2576553	212429168	2167857		188396552		1402756		123304569		35.3
hv4_s2_2	hv4_13	2906655	267412260	2760034	233684075	2264839	4432696	199662706	388059258	1476614	2879370	131109165	254413734	34.8
hv4_s2_1	hv4_14	4934023	453930116	4048891	337883939	4010616		335373076		2296160		196187953		42.7
hv4_s2_2	hv4_14	5005891	460541972	4440909	374588290	4106940	8117556	351207673	686580749	2363279	4659439	205359724	401547677	42.5
hv4_s2_1	hv4_15	8638753	794765276	7943835	674442573	7377427		637907895		4402118		385275213		40.3
hv4_s2_2	hv4_15	8766488	806516896	8201821	709208261	7507435	14884862	658281852	1296189747	4492775	8894893	397314553	782589766	40.2
hv4_s2_1	hv4_16	4735669	435681548	4139373	351325459	3994059		343819777		2103722		184075912		47.3
hv4_s2_2	hv4_16	4803635	441934420	4533792	394120563	4259002	8253061	374774815	718594592	2279935	4383657	202527340	386603252	46.5
hv4_s2_1	hv4_17	4582462	421586504	4209267	364698626	4091202		357208179		2578926		227794808		37
hv4_s2_2	hv4_17	4612112	424314304	4362476	383440623	4228884	8320086	373998639	731206818	2681507	5260433	239129542	466924350	36.6
hv4_s2_1	hv4_18	6252446	575225032	5780298	484731183	5082614		441555408		2828308		248977592		44.4
hv4_s2_2	hv4_18	6266745	576540540	5904253	505979095	5144965	10227579	454043002	895598410	2875525	5703833	256212710	505190302	44.1
hv4_s2_1	hv4_19	5370710	494105320	4771699	395231778	4131745		355091466		2390991		208806423		42.1
hv4_s2_2	hv4_19	5429619	499524948	5043741	428760280	4354691	8486436	381834493	736925959	2544856	4935847	225364366	434170789	41.6
hv4_s2_1	hv4_20	5232655	481404260	4855669	417559420	4647055		404066913		2681540		236197292		42.3
hv4_s2_2	hv4_20	5271815	485006980	5006666	438271469	4777081	9424136	422086006	826152919	2777929	5459469	247610810	483808102	41.8
hv4_s2_1	hv4_21	3681691	338715572	3377394	291725099	3350984		290219005		2363420		206800168		29.5
hv4_s2_2	hv4_21	3740828	344156176	3520950	309890630	3480289	6831273	306893585	597112590	2451118	4814538	217735584	424535752	29.6
hv4_s2_1	hv4_22	3394768	312318656	2966686	257066272	2962557		256648397		1835074		161286354		38.1
hv4_s2_2	hv4_22	3513799	323269508	3286088	287832300	3245065	6207622	284714739	541363136	2030408	3865482	179779987	341066341	37.4
hv4_s2_1	hv4_23	6236293	573738956	5614216	481066738	5397018		468547333		3488418		306618590		35.4
hv4_s2_2	hv4_23	6405556	589311152	6013259	524663772	5728545	11125563	504579002	973126335	3731533	7219951	331395105	638013695	34.9
hv4_s2_1	hv4_24	3129294	287895048	2744802	236973369	2678304		233238935		1889535		166314514		29.5
hv4_s2_2	hv4_24	3257137	299656604	3081394	270356040	2982750	5661054	263068422	496307357	2113768	4003303	187656090	353970604	29.1
hv4_s3_1	hv4_25	7846444	721872848	7119333	622947937	6976481		613824827		4573423		406088746		34.4
hv4_s3_2	hv4_25	7862192	723321664	7096548	620253933	6921836	13898317	607836619	1221661446	4559631	9133054	404207576	810296322	34.1
hv4_s3_1	hv4_26	8642470	795107240	7281608	620959290	7267725		619730302		4098225		356263751		43.6
hv4_s3_2	hv4_26	8876357	816624844	7350793	625798825	7259548	14527273	619205463	1238935765	4132206	8230431	359000293	715264044	43.1
hv4_s3_1	hv4_27	8261627	760069684	7514225	657368364	7407886		650365969		4565407		405042738		38.4
hv4_s3_2	hv4_27	8389400	771824800	7492619	653308185	7355512	14763398	643332031	1293698000	4561822	9127229	403418815	808461553	38
hv4_s3_1	hv4_28	4864735	447555620	4404023	386430818	4366556		384260172		3019031		268087932		30.9
hv4_s3_2	hv4_28	4894833	450324636	4441539	389294417	4370479	8737035	384242624	768502796	3037070	6056101	269425466	537513398	30.5
hv4_s3_1	hv4_29	5139134	472800328	4690361	409947517	4606688		404583488		2533891		225285710		45
hv4_s3_2	hv4_29	5143232	473177344	4625960	403375128	4530844	9137532	396639806	801223294	2513689	5047580	222914357	448200067	44.5
hv4_s3_1	hv4_30	5865526	539628392	5289547	455247500	5014253		438831121		2524164		224128558		49.7
hv4_s3_2	hv4_30	5880598	541015016	5246243	451586024	4936344	9950597	430994781	869825902	2508085	5032249	222238454	446367012	49.2
hv4_s3_1	hv4_31	5776848	531470016	5152655	440454179	4825525		420680483		2546522		225175408		47.2
hv4_s3_2	hv4_31	5804686	534031112	5132824	439439885	4791889	9617414	417001826	837682309	2551289	5097811	225308225	450483633	46.8
hv4_s3_1	hv4_32	5521118	507942856	5088314	446446221	5032077		442415333		2811276		249976797		44.1
hv4_s3_2	hv4_32	5578386	513211512	5087971	445381293	5025909	10057986	440564383	882979716	2831104	5642380	251064799	501041596	43.7
hv4_s3_1	hv4_33	4116596	378726832	3724702	324902341	3668661		321234639		2226312		196988974		39.3
hv4_s3_2	hv4_33	4183797	384909324	3791154	331111390	3708568	7377229	324900756	646135395	2257612	4483924	199795305	396784279	39.1
hv4_s3_1	hv4_34	6987579	642857268	6214363	545309302	6204939		544206750		3636595		322352478		41.4
hv4_s3_2	hv4_34	7119744	655016448	6373888	558280745	6302464	12507403	552715707	1096922457	3716323	7352918	329422811	651775289	41
hv4_s3_1	hv4_35	10580790	973432680	9280972	801320336	8827249		773657747		5840824		516248014		33.8
hv4_s3_2	hv4_35	10838322	997125624	9524370	821459304	8914981	17742230	777802441	1551460188	5945655	11786479	523134134	1039382148	33.3
hv4_s3_1	hv4_36	8282121	761955132	7435645	652522659	7347175		646903914		4655754		413901467		36.6
hv4_s3_2	hv4_36	8460878	778400776	7637786	669485257	7492591	14839766	658389461	1305293375	4786226	9441980	424451939	838353406	36.1
hv4_s4_1	hv4_37	5245255	482563460	4884104	431406320	4852593		429421008		3249439		290013369		33
hv4_s4_2	hv4_37	5218455	480097860	4851093	428310842	4813035	9665628	425640526	855061534	3236362	6485801	288692633	578706002	32.8
hv4_s4_1	hv4_38	8774434	807247928	7522474	640763316	7509098		639699549		3905181		339774705		48
hv4_s4_2	hv4_38	8695631	799998052	7352944	625930925	7289950	14799048	621315204	1261014753	3831555	7736736	333053080	672827785	47.4
hv4_s4_1	hv4_39	7654864	704247488	7000796	608836301	6826762		597754364		3922563		347667857		42.5
hv4_s4_2	hv4_39	7594844	698725648	6841174	592552640	6626319	13453081	577403983	1175158347	3839845	7762408	338805678	686473535	42.1
hv4_s4_1	hv4_40	4773672	439177824	4295991	373842645	4195161		368118586		2537155		224929543		39.5
hv4_s4_2	hv4_40	4767762	438634104	4411901	385388099	4242333	8437494	373478437	741597023	2576418	5113573	229097943	454027486	39.3
hv4_s4_1	hv4_41	8814224	810908608	8049423	707018785	7979471		702380924		3916599		349323141		50.9
hv4_s4_2	hv4_41	8767121	806575132	7969346	699234606	7890427	15869898	693522611	1395903535	3902619	7819218	347707454	697030595	50.5
hv4_s4_1	hv4_42	7542829	693940268	6863115	592521162	6505184		570808704		3060256		272319121		53
hv4_s4_2	hv4_42	7514012	691289104	6796409	586626178	6399080	12904264	560021403	1130830107	3042848	6103104	270118146	542437267	52.4
hv4_s4_1	hv4_43	6478366	596009672	5788627	494113325	5362558		467794585		2517950		222921052		53
hv4_s4_2	hv4_43	6459394	594264248	5798062	496835315	5356566	10719124	467472911	935267496	2541909	5059859	225125012	448046064	52.5
hv4_s4_1	hv4_44	6805628	626117776	6283421	550449684	6179669		543110808		2880437		256428460		53.4
hv4_s4_2	hv4_44	6790677	624742284	6236050	545468825	6123637	12303306	536866657	1079977465	2888583	5769020	256558542	512987002	52.8
hv4_s4_1	hv4_45	7451304	685519968	6864415	603060260	6826301		600797453		4200519		373532669		38.5
hv4_s4_2	hv4_45	7422959	682912228	6794814	596621265	6739542	13565843	592693087	1193490540	4165415	8365934	370145739	743678408	38.2
hv4_s4_1	hv4_46	4274992	393299264	3949449	348505373	3947575		348243590		2531283		225619816		35.9
hv4_s4_2	hv4_46	4257175	391660100	3924278	345509740	3909110	7856685	344284421	692528011	2519590	5050873	224156386	449776202	35.5
hv4_s4_1	hv4_47	6145818	565415256	5618053	491307206	5486997		483317834		3658258		325061992		33.3
hv4_s4_2	hv4_47	6172855	567902660	5604352	488183296	5432801	10919798	475960243	959278077	3648631	7306889	322545214	647607206	32.8
hv4_s4_1	hv4_48	5752463	529226596	5295600	466087908	5251837		463546169		3141106		280130122		40.2
hv4_s4_2	hv4_48	5767593	530618556	5334600	469121421	5266702	10518539	464216918	927763087	3177797	6318903	282939590	563069712	39.7
hv4_s5_1	hv4_49	4442452	408705584	4102985	361029260	3997360		354649445		2629445		235059666		34.2
hv4_s5_2	hv4_49	4442452	408705584	4078710	356300424	3949338	7946698	347258220	701907665	2614331	5243776	231741039	466800705	33.8
hv4_s5_1	hv4_50	5645798	519413416	4768106	409566853	4757671		408567217		2546248		222746240		46.5
hv4_s5_2	hv4_50	5645798	519413416	4878144	417456794	4805500	9563171	412082397	820649614	2581418	5127666	225116764	447863004	46.3
hv4_s5_1	hv4_51	4864668	447549456	4482686	394474718	4404511		389514884		2474797		221005533		43.8
hv4_s5_2	hv4_51	4864668	447549456	4448573	388831541	4353440	8757951	381977627	771492511	2456504	4931301	217756835	438762368	43.6
hv4_s5_1	hv4_52	4463395	410632340	4069156	360778211	4045422		359204343		2771913		247967154		31.5
hv4_s5_2	hv4_52	4463395	410632340	4118408	362558952	4066505	8111927	358586256	717790599	2801140	5573053	248813428	496780582	31.1
hv4_s5_1	hv4_53	112175	10320100	101106	8668381	93364		8155778		55054		4852655		41
hv4_s5_2	hv4_53	112175	10320100	97896	8318755	89535		7704967		53575		4656116		40.2
hv7_s1_1	hv4_53	6411068	589818256	2918130	248729776	2917582		248615232		1662482		144385300		43
hv7_s1_2	hv4_53	6411068	589818256	395246	33157912	395048		33132749		222839		19173111		43.6
hv7_s1_redo_1	hv4_53	11116775	1022743300	9729884	853438970	9726921		852964037		5086693		449463016		47.7
hv7_s1_redo_2	hv4_53	11116775	1022743300	9532888	836030387	9525283	22747733	835187984	1985760747	5038382	12119025	445308838	1067839036	47.1
hv4_s5_1	hv4_54	4836320	444941440	4383567	381588218	4209519		370920216		1879230		167646576		55.4
hv4_s5_2	hv4_54	4836320	444941440	4397610	380782616	4201920	8411439	367395441	738315657	1901508	3780738	168294662	335941238	54.7
hv4_s5_1	hv4_55	9754652	897427984	8654642	751171030	8261181		726484864		4325163		384883005		47.6
hv4_s5_2	hv4_55	9754652	897427984	8707810	752227489	8302229	16563410	724757044	1451241908	4394655	8719818	387980567	772863572	47.1
hv4_s5_1	hv4_56	5818560	535307520	5434544	480151609	5353507		474748939		2891172		258889143		46
hv4_s5_2	hv4_56	5818560	535307520	5358288	469365308	5270197	10623704	462937817	937686756	2866883	5758055	254530823	513419966	45.6
hv4_s5_1	hv4_57	6392040	588067680	5786818	506196832	5646748		498075384		2856084		254756317		49.4
hv4_s5_2	hv4_57	6392040	588067680	5803336	504588787	5589005	11235753	489399712	987475096	2842609	5698693	251834794	506591111	49.1
hv4_s5_1	hv4_58	7839802	721261784	6987178	619691686	6979322		618514648		4465365		399085320		36
hv4_s5_2	hv4_58	7839802	721261784	7085860	623485582	7028850	14008172	618684363	1237199011	4518650	8984015	401049594	800134914	35.7
hv4_s5_1	hv4_59	13400580	1232853360	11905238	1051406232	11679505		1035538239		8461592		754568959		27.6
hv4_s5_2	hv4_59	13400580	1232853360	11986897	1050388098	11694714	23374219	1026878276	2062416515	8508778	16970370	751724789	1506293748	27.2
hv4_s5_1	hv4_60	5321560	489583520	4794688	424239656	4739553		420430810		3012376		269414655		36.4
hv4_s5_2	hv4_60	5321560	489583520	4893370	429724224	4797058	9536611	422159443	842590253	3071982	6084358	272513994	541928649	36
hv4_s6_1	hv4_61	4001672	368153824	3723215	327635555	3657342		323553336		1942257		173734499		46.9
hv4_s6_2	hv4_61	3989282	367013944	3712846	324523524	3631243	7288585	318786707	642340043	1944770	3887027	172655225	346389724	46.4
hv4_s6_1	hv4_62	9307365	856277580	8009338	691847635	7997948		688550513		5625273		489889939		29.7
hv4_s6_2	hv4_62	9323422	857754824	8104892	697098021	8025562	16023510	688849504	1377400017	5664059	11289332	491305387	981195326	29.4
hv4_s6_1	hv4_63	5351616	492348672	4949651	433683048	4814506		424030038		2696844		239675377		44
hv4_s6_2	hv4_63	5385528	495468576	4965016	431808910	4795232	9609738	418547856	842577894	2703064	5399908	238136913	477812290	43.6
hv4_s6_1	hv4_64	6576155	605006260	5792356	503851037	5607070		493459938		3112128		276592648		44.5
hv4_s6_2	hv4_64	6631358	610084936	6103401	527967482	5722085	11329155	501281911	994741849	3210805	6322933	283925652	560518300	43.9
hv4_s6_1	hv4_65	3311885	304693420	3069666	270779571	3009390		266551011		1989740		177528582		33.9
hv4_s6_2	hv4_65	3304234	303989528	3078052	269977687	3010591	6019981	264784490	531335501	2000454	3990194	177244019	354772601	33.6
hv4_s6_1	hv4_66	8500555	782051060	7791725	682573413	7511840		664740199		4617327		411981808		38.5
hv4_s6_2	hv4_66	8495359	781573028	7816858	681186187	7505610	15017450	659297354	1324037553	4642377	9259704	411155148	823136956	38.1
hv4_s6_1	hv4_67	7823574	719768808	6959288	595184107	6327728		555827309		3564857		316475584		43.7
hv4_s6_2	hv4_67	7870489	724084988	7083721	605491237	6437279	12765007	562129119	1117956428	3664588	7229445	323202876	639678460	43.1
hv4_s6_1	hv4_68	3819936	351434112	3541167	304671532	3224641		284629162		1695191		150875387		47.4
hv4_s6_2	hv4_68	3830159	352374628	3561397	305205719	3223077	6447718	282091082	566720244	1714542	3409733	151331065	302206452	46.8
hv4_s6_1	hv4_69	3703387	340711604	3390075	297114493	3324905		293290188		1705032		152040962		48.7
hv4_s6_2	hv4_69	3715562	341831704	3414822	297277257	3313035	6637940	289990783	583280971	1712669	3417701	151511968	303552930	48.3
hv4_s6_1	hv4_70	8083561	743687612	7359255	652803397	7352573		651950798		4714255		421535180		35.9
hv4_s6_2	hv4_70	8110590	746174280	7439931	653662818	7381598	14734171	649089561	1301040359	4765132	9479387	422438678	843973858	35.4
hv4_s6_1	hv4_71	10911345	1003843740	9804310	852375553	9349272		825990218		5543201		493964669		40.7
hv4_s6_2	hv4_71	10971504	1009378368	9941896	859003769	9317231	18666503	816085241	1642075459	5557920	11101121	491452265	985416934	40.3
hv4_s6_1	hv4_72	3856376	354786592	3494972	306356942	3399029		300695066		2220551		197787394		34.7
hv4_s6_2	hv4_72	3879979	356958068	3631089	316582226	3463871	6862900	304459691	605154757	2278333	4498884	201617967	399405361	34.2
hv4_s7_1	hv4_73	9261190	852029480	8597930	765137579	8581501		762271620		5639829		504440139		34.3
hv4_s7_2	hv4_73	9257029	851646668	8581366	759733198	8560396	17141897	756108847	1518380467	5651925	11291754	502758143	1007198282	34
hv4_s7_1	hv4_74	9626112	885602304	8129166	698856803	8112329		695543296		4395832		383277682		45.8
hv4_s7_2	hv4_74	9877074	908690808	8516859	728875131	8327362	16439691	712922816	1408466112	4551768	8947600	395278586	778556268	45.3
hv4_s7_1	hv4_75	8236226	757732792	7641703	677499336	7616311		673585149		4281262		381814730		43.8
hv4_s7_2	hv4_75	8247068	758730256	7592671	668954985	7562322	15178633	664278400	1337863549	4272937	8554199	378704168	760518898	43.5
hv4_s7_1	hv4_76	5789107	532597844	5279466	468283242	5277345		467624426		3214994		287627625		39.1
hv4_s7_2	hv4_76	5879896	540950432	5449436	480704514	5443427	10720772	479365231	946989657	3358717	6573711	298259114	585886739	38.3
hv4_s7_1	hv4_77	10389673	955849916	9582969	852359264	9572924		850583176		5969728		534582877		37.6
hv4_s7_2	hv4_77	10393019	956157748	9553844	844900710	9539878	19112802	842533851	1693117027	5979927	11949655	532407217	1066990094	37.3
hv4_s7_1	hv4_78	7033733	647103436	6437196	567015497	6372312		562656244		3278005		292704573		48.6
hv4_s7_2	hv4_78	6438944	592382848	5875676	512529144	5811233	12183545	507686520	1070342764	3029968	6307973	267697968	560402541	47.9
hv4_s7_1	hv4_79	7790321	716709532	7047725	621323266	7044918		620830466		3752429		334762203		46.7
hv4_s7_2	hv4_79	7870342	724071464	7183341	630034678	7177152	14222070	629045044	1249875510	3874520	7626949	343305730	678067933	46
hv4_s7_1	hv4_80	7460632	686378144	7020104	625296837	7018059		624950966		4288842		384834569		38.9
hv4_s7_2	hv4_80	7448674	685278008	6918384	611366713	6915221	13933280	610892992	1235843958	4248039	8536881	378514548	763349117	38.6
hv4_s7_1	hv4_81	6112003	562304276	5603216	496065913	5598909		494939712		3492345		311213941		37.6
hv4_s7_2	hv4_81	6201462	570534504	5679126	500512155	5671405	11270314	498921145	993860857	3547289	7039634	314487597	625701538	37.5
hv4_s7_1	hv4_82	6606900	607834800	6041287	536560833	6039560		536118789		4036381		361082129		33.2
hv4_s7_2	hv4_82	6280497	577805724	5813523	513487206	5805706	11845266	512380390	1048499179	3892815	7929196	346013073	707095202	32.9
hv4_s8_1	hv4_83	6607525	607892300	6225881	554597120	6203231		552657285		3872651		347557555		37.6
hv4_s8_2	hv4_83	6613272	608421024	6242019	553649460	6214323	12417554	551109959	1103767244	3897490	7770141	348121652	695679207	37.3
hv4_s8_1	hv4_84	8224644	756667248	7246406	629237588	7240226		627628142		4645532		407707561		35.8
hv4_s8_2	hv4_84	8382170	771159640	7483877	649227448	7442255	14682481	644536029	1272164171	4791870	9437402	419398494	827106055	35.6
hv4_s8_1	hv4_85	9010734	828987528	8432587	751324188	8345938		742990172		5772056		516662720		30.8
hv4_s8_2	hv4_85	9059271	833452932	8464676	750363184	8368228	16714166	740456863	1483447035	5801824	11573880	516177211	1032839931	30.7
hv4_s8_1	hv4_86	7014075	645294900	6295722	559173778	6289973		557805192		3669890		328603684		41.7
hv4_s8_2	hv4_86	7269909	668831628	6773621	598480260	6760256	13050229	595413360	1153218552	4047423	7717313	358649086	687252770	40.1
hv4_s8_1	hv4_87	7071491	650577172	6625073	591427571	6620734		590746219		4147027		372741488		37.4
hv4_s8_2	hv4_87	7087438	652044296	6673280	593056245	6666675	13287409	592087302	1182833521	4197440	8344467	375466701	748208189	37
hv4_s8_1	hv4_88	7217381	663999052	6744155	601690389	6720600		599755208		4493168		403562173		33.1
hv4_s8_2	hv4_88	7288061	670501612	6694473	586619215	6669159	13389759	584363829	1184119037	4494003	8987171	396805303	800367476	32.6
hv4_s8_1	hv4_89	6873759	632385828	6291259	556300163	6286642		555352664		3248497		290068744		48.3
hv4_s8_2	hv4_89	7010979	645010068	6495099	571638495	6487401	12774043	570067382	1125420046	3410675	6659172	302326706	592395450	47.4
hv4_s8_1	hv4_90	6586997	606003724	6244588	558526472	6239763		557596099		4028479		362277914		35.4
hv4_s8_2	hv4_90	6600393	607236156	6254282	556298960	6248446	12488209	555154746	1112750845	4054455	8082934	362537581	724815495	35.1
hv4_s8_1	hv4_91	5607409	515881628	5270279	468135824	5269414		467736212		3552567		317450897		32.6
hv4_s8_2	hv4_91	5660530	520768760	5315254	471035162	5312861	10582275	470377764	938113976	3592829	7145396	320015081	637465978	32.4
	TOTAL	1185116011	108905622457	1062686165	92360119663		1030427735		90179312277		620977099		54896699649
	AVERAGE	6.37159e+06	5.85514e+08	5.71337e+06	4.9656e+08		1.13234e+07		9.90981e+08		6.82392e+06		6.0326e+08	39.6984
	MIN	112175	10320100	97896	8318755		4432696		388059258		2879370		254413734	27.2
	MAX	13400580	1232853360	11986897	1051406232		23374219		2062416515		16970370		1506293748	55.4
	read length		91.8945		86.9119				87.5164				88.4037
													191.947

## Sheet: HV5-multiplex_counts_detail_v9
Lane	Pool	# Seq after Demultiplex	Bases after Demultiplex	# Seq after Quality Trim	Bases after Quality Trim	# Seq after Adapter removal	Column G (left+right mate)	Bases after Adapter Removal	Column I (left+right mate)	# Seq after E coli removal	Column K (left+right mate)	Bases after E coli removal	Column M (left+right mate)	% E coli
hv5_s1_1	hv5_01	10133041	932239772	9337511	830843751	9334008		829889183		4240554		381110472		54.6
hv5_s1_2	hv5_01	10159412	934665904	9432822	834853257	9424909	18758917	833417351	1663306534	4347744	8588298	388407216	769517688	53.9
hv5_s1_1	hv5_02	6482224	596364608	5637438	486900149	5635819		486310114		2864084		251815115		49.2
hv5_s1_2	hv5_02	6585343	605851556	5827255	503558028	5819474	11455293	502420288	988730402	2974231	5838315	261027512	512842627	48.9
hv5_s1_1	hv5_03	6314056	580893152	5884718	522302622	5881039		521369004		2571215		230534491		56.3
hv5_s1_2	hv5_03	6338404	583133168	5885917	519342522	5879800	11760839	518184834	1039553838	2590873	5162088	230899298	461433789	55.9
hv5_s1_1	hv5_04	5046795	464305140	4564474	405497661	4562990		405061696		2291991		205945659		49.8
hv5_s1_2	hv5_04	5146235	473453620	4807384	424649040	4802283	9365273	423778841	828840537	2483441	4775432	221221511	427167170	48.3
hv5_s1_1	hv5_05	4451929	409577468	4164971	370415683	4163769		370206876		1845595		165979076		55.7
hv5_s1_2	hv5_05	4456477	409995884	4179206	369606365	4176525	8340294	369266407	739473283	1874828	3720423	167658162	333637238	55.1
hv5_s1_1	hv5_06	5641538	519021496	5229198	464401325	5226715		463872370		2323727		208627020		55.5
hv5_s1_2	hv5_06	5692184	523680928	5320003	469334251	5312897	10539612	468403459	932275829	2409308	4733035	214662770	423289790	54.7
hv5_s1_1	hv5_07	5641120	518983040	5162423	455622992	5160734		455182622		2082382		186349999		59.6
hv5_s1_2	hv5_07	5704461	524810412	5284103	463991188	5280430	10441164	463320680	918503302	2185828	4268210	194139587	380489586	58.6
hv5_s1_1	hv5_08	5059995	465519540	4759905	422872200	4757569		421852601		1923668		172556274		59.6
hv5_s1_2	hv5_08	5072860	466703120	4776442	421644123	4771892	9529461	420362487	842215088	1962293	3885961	174845471	347401745	58.9
hv5_s1_1	hv5_09	5545965	510228780	5137138	454668070	5135343		453976303		2165975		193801936		57.8
hv5_s1_2	hv5_09	5619962	517036504	5214142	458977722	5208662	10344005	457879316	911855619	2228625	4394600	198066489	391868425	57.2
hv5_s1_1	hv5_10	4761755	438081460	4330990	385024466	4329308		384634060		2179680		195902546		49.7
hv5_s1_2	hv5_10	4906819	451427348	4590061	405227310	4581185	8910493	404127457	788761517	2362024	4541704	210223309	406125855	48.4
hv5_s1_1	hv5_11	7638249	702718908	7025655	624680240	7021014		623116700		3853655		345401547		45.1
hv5_s1_2	hv5_11	7739966	712076872	7192955	634600311	7181672	14202686	632316168	1255432868	3991393	7845048	354669674	700071221	44.4
hv5_s1_1	hv5_12	3864267	355512564	3549208	317108316	3543063		316119414		2370532		213118408		33.1
hv5_s1_2	hv5_12	3962189	364521388	3754343	333196106	3743845	7286908	331641214	647760628	2528692	4899224	225393489	438511897	32.5
hv5_s1_1	hv5_13	1622407	149261444	1524915	135425599	1524290		135222422		713449		64026424		53.2
hv5_s1_2	hv5_13	1636651	150571892	1543312	136134645	1539816		135707543		730059		65052192		52.6
bac_redo_04_HV5_13_1	hv5_13	9253670	851337640	6880063	575646312	6868967		574598804		669280		57580189		90.3
bac_redo_04_HV5_13_2	hv5_13	10785776	992291392	9861126	863844563	9825146	19758219	860750720	1706279489	2193704	4306492	190982644	377641449	77.7
hv5_s2_1	hv5_14	5037025	463406300	4630085	410092041	4624818		408538227		2039469		182468365		55.9
hv5_s2_2	hv5_14	5072228	466644976	4711453	414812215	4702695	9327513	412686786	821225013	2125614	4165083	188620721	371089086	54.8
hv5_s2_1	hv5_15	6427506	591330552	5544221	475354262	5542684		474418456		2440371		213553916		56
hv5_s2_2	hv5_15	6486960	596800320	5649611	484639175	5644270	11186954	483305598	957724054	2506033	4946404	218867028	432420944	55.6
hv5_s2_1	hv5_16	5242869	482343948	4880988	431022976	4878790		430604069		1767417		158200661		63.8
hv5_s2_2	hv5_16	5237173	481819916	4832107	424044732	4827588	9706378	423410236	854014305	1762244	3529661	156811464	315012125	63.5
hv5_s2_1	hv5_17	5064428	465927376	4527019	400014207	4524675		399310874		2035370		182174634		55
hv5_s2_2	hv5_17	5193150	477769800	4795680	421509504	4787383	9312058	420042241	819353115	2236567	4271937	198201054	380375688	53.3
hv5_s2_1	hv5_18	8550101	786609292	7813188	691490815	7806615		689372675		3402665		304358861		56.4
hv5_s2_2	hv5_18	8575021	788901932	7866404	692075019	7855206	15661821	689305535	1378678210	3483039	6885704	309366320	613725181	55.7
hv5_s2_1	hv5_19	8878446	816817032	8119561	717699959	8116383		716669194		3513897		314132705		56.7
hv5_s2_2	hv5_19	8938782	822367944	8194964	719619877	8185177	16301560	717934900	1434604094	3605006	7118903	319928131	634060836	56
hv5_s2_1	hv5_20	5285201	486238492	4778291	420189694	4775911		419520644		2166943		193113198		54.6
hv5_s2_2	hv5_20	5349549	492158508	4892893	427831666	4887969	9663880	426810434	846331078	2269116	4436059	200602251	393715449	53.6
hv5_s2_1	hv5_21	6916531	636320852	6407755	568598947	6405151		567848282		2997338		268788261		53.2
hv5_s2_2	hv5_21	6941795	638645140	6457227	569379457	6451324	12856475	568211872	1136060154	3068435	6065773	273233451	542021712	52.4
hv5_s2_1	hv5_22	6039939	555674388	5555974	490800918	5554198		490132306		2412924		215626312		56.6
hv5_s2_2	hv5_22	6091136	560384512	5593706	491627671	5588873	11143071	490606753	980739059	2454663	4867587	218066038	433692350	56.1
hv5_s2_1	hv5_23	7017372	645598224	6316231	560751890	6314355		560413562		3477608		312021948		44.9
hv5_s2_2	hv5_23	7212677	663566284	6659702	587490502	6649068	12963423	586311587	1146725149	3716988	7194596	330713589	642735537	44.1
hv5_s2_1	hv5_24	7019640	645806880	6428764	568619372	6424241		567453595		2844192		254438582		55.7
hv5_s2_2	hv5_24	7076434	651031928	6508122	571542999	6496437	12920678	569670757	1137124352	2923301	5767493	259514022	513952604	55
hv5_s2_1	hv5_25	4480454	412201768	4096340	363718496	4085624		362119348		2227728		199549499		45.5
hv5_s2_2	hv5_25	4597916	423008272	4314554	381064943	4297284	8382908	378423408	740542756	2393095	4620823	212456473	412005972	44.3
hv5_s2_1	hv5_26	5407806	497518152	4997927	442059115	4994153		439819208		2205563		196828702		55.8
hv5_s2_2	hv5_26	5475423	503738916	5057402	444007133	5039675	10033828	440393316	880212524	2269167	4474730	200670799	397499501	55
hv5_s3_1	hv5_27	2701143	248505156	2566294	226983699	2565861		226758569		1214997		108930791		52.6
hv5_s3_2	hv5_27	2707306	249072152	2606918	230870430	2605624	5171485	230522608	457281177	1256319	2471316	112479817	221410608	51.8
hv5_s3_1	hv5_28	5760019	529921748	5289915	454656006	5289328		454436720		2512681		220901437		52.5
hv5_s3_2	hv5_28	5798003	533416276	5332191	458096789	5329317	10618645	457660138	912096858	2558798	5071479	224527586	445429023	52
hv5_s3_1	hv5_29	2910359	267753028	2763404	244249102	2761295		243928561		1359810		121692248		50.8
hv5_s3_2	hv5_29	2921519	268779748	2794467	247002195	2791098	5552393	246538978	490467539	1389026	2748836	124091273	245783521	50.2
hv5_s3_1	hv5_30	4421644	406791248	4153232	366880864	4152577		366596775		1931921		173276211		53.5
hv5_s3_2	hv5_30	4470522	411288024	4282706	379037679	4280247	8432824	378474436	745071211	2037305	3969226	182402850	355679061	52.4
hv5_s3_1	hv5_31	3693900	339838800	3503461	310064017	3501473		309039847		1821314		162929022		48
hv5_s3_2	hv5_31	3710067	341326164	3556973	315075958	3553631	7055104	313753816	622793663	1872216	3693530	167216895	330145917	47.3
hv5_s3_1	hv5_32	5154679	474230468	4850381	427597007	4848331		426680139		2196382		196195938		54.7
hv5_s3_2	hv5_32	5195781	478011852	4965244	438301404	4959097	9807428	436882844	863562983	2291010	4487392	204240096	400436034	53.8
hv5_s3_1	hv5_33	3712576	341556992	3500979	307682299	3500111		307384124		1653039		147475436		52.8
hv5_s3_2	hv5_33	3739407	344025444	3572642	314489318	3570618	7070729	314011460	621395584	1711178	3364217	152488673	299964109	52.1
hv5_s3_1	hv5_34	6032686	555007112	5726601	508749768	5725219		508017140		3479487		312095538		39.2
hv5_s3_2	hv5_34	6060653	557580076	5822328	517758011	5818773	11543992	516676952	1024694092	3566288	7045775	319489726	631585264	38.7
hv5_s3_1	hv5_35	3973337	365547004	3703607	325988724	3702729		325504744		1745825		155878287		52.9
hv5_s3_2	hv5_35	4043504	372002368	3846303	338695094	3843358	7546087	337869965	663374709	1856251	3602076	164975877	320854164	51.7
hv5_s3_1	hv5_36	2601260	239315920	2323289	204955399	2322320		204687374		1148616		103004204		50.5
hv5_s3_2	hv5_36	2724939	250694388	2597659	228775671	2592138	4914458	227971571	432658945	1348021	2496637	119702668	222706872	48
hv5_s3_1	hv5_37	6460983	594410436	6006810	530408740	6004488		530012444		3077962		275593713		48.7
hv5_s3_2	hv5_37	6531105	600861660	6212250	548229513	6203127	12207615	547178328	1077190772	3249563	6327525	289823947	565417660	47.6
hv5_s3_1	hv5_38	5604188	515585296	5118848	455322798	5112710		454736892		3759275		337591549		26.5
hv5_s3_2	hv5_38	5741300	528199600	5515127	490978853	5503288	10615998	489732515	944469407	4071027	7830302	364537086	702128635	26
hv5_s3_1	hv5_39	7345716	675805872	6917084	611036576	6915401		610477906		3118875		279423608		54.9
hv5_s3_2	hv5_39	7397324	680553808	7048484	622933651	7042362	13957763	621918630	1232396536	3226202	6345077	288558203	567981811	54.2
hv5_s4_1	hv5_40	5612710	516369320	5200533	458962391	5198528		458197847		2714231		242650772		47.8
hv5_s4_2	hv5_40	5681922	522736824	5441688	481832979	5434947	10633475	480517836	938715683	2901334	5615565	259033826	501684598	46.6
hv5_s4_1	hv5_41	6061662	557672904	5545093	477702524	5544478		477521540		2779460		244761555		49.9
hv5_s4_2	hv5_41	6112955	562391860	5617785	483945388	5614461	11158939	483519260	961040800	2841989	5621449	249873857	494635412	49.4
hv5_s4_1	hv5_42	4424591	407062372	4179504	369487358	4178512		369291892		2002458		179387828		52.1
hv5_s4_2	hv5_42	4446492	409077264	4240679	375100991	4238266	8416778	374768314	744060206	2050718	4053176	183507233	362895061	51.6
hv5_s4_1	hv5_43	3481363	320285396	3194717	282678354	3194125		282572717		1879578		168611423		41.2
hv5_s4_2	hv5_43	3548182	326432744	3403376	301836681	3400081	6594206	301428244	584000961	2042924	3922502	182768782	351380205	39.9
hv5_s4_1	hv5_44	3282285	301970220	3089564	273452826	3088825		273239961		1513512		135786809		51
hv5_s4_2	hv5_44	3293837	303033004	3157937	279773296	3156097	6244922	279415130	552655091	1573580	3087092	140964512	276751321	50.1
hv5_s4_1	hv5_45	3337949	307091308	3103626	273923489	3102575		273741236		1514088		135630682		51.2
hv5_s4_2	hv5_45	3376089	310600188	3235917	285878118	3232179	6334754	285429431	559170667	1620301	3134389	144649626	280280308	49.9
hv5_s4_1	hv5_46	2431422	223690824	2230042	195754307	2229457		195631321		1038002		92621786		53.4
hv5_s4_2	hv5_46	2472012	227425104	2348336	206166456	2346528		205893419		1131181		100393346		51.8
bac_redo_04_HV5_46_1	hv5_46	9093224	836576608	8473323	754800357	8464045		753506337		4062577		364568935		52
bac_redo_04_HV5_46_2	hv5_46	9264200	852306400	8728121	776590857	8714743	21754773	774958056	1929989133	4305501	10537261	384689707	942273774	50.6
hv5_s4_1	hv5_47	5643832	519232544	5334784	471812334	5332993		470924847		2359921		211374346		55.7
hv5_s4_2	hv5_47	5666599	521327108	5426964	480328964	5423020	10756013	479091161	950016008	2445374	4805295	218662245	430036591	54.9
hv5_s4_1	hv5_48	2726154	250806168	2512585	220928664	2511901		220590033		1187293		105852052		52.7
hv5_s4_2	hv5_48	2798504	257462368	2659135	233664723	2656460	5168361	233041049	453631082	1298422	2485715	114967232	220819284	51.1
hv5_s4_1	hv5_49	6497357	597756844	5862723	518416992	5857824		517494966		3063442		274630906		47.7
hv5_s4_2	hv5_49	6741849	620250108	6390705	563704293	6366739	12224563	560924244	1078419210	3443994	6507436	306512542	581143448	45.9
hv5_s4_1	hv5_50	8215105	755789660	7635256	674415404	7630855		673403534		3579713		320502510		53.1
hv5_s4_2	hv5_50	8293407	762993444	7855251	692994275	7843374	15474229	691170079	1364573613	3766188	7345901	335889605	656392115	52
hv5_s4_1	hv5_51	4699825	432383900	4351487	385142509	4345234		384422665		2218639		198983076		48.9
hv5_s4_2	hv5_51	4788000	440496000	4592013	406708730	4581678	8926912	405465446	789888111	2410767	4629406	215420785	414403861	47.4
hv5_s4_1	hv5_52	4483324	412465808	4197857	370993676	4193695		369951441		2039271		182476320		51.4
hv5_s4_2	hv5_52	4552662	418844904	4350362	384035832	4337846	8531541	382098179	752049620	2159691	4198962	192395514	374871834	50.2
hv5_s5_1	hv5_53	6402639	589042788	6006032	529490229	5998220		528511180		2873474		256975638		52.1
hv5_s5_2	hv5_53	6382706	587208952	6004782	529366397	5994777	11992997	528118425	1056629605	2892648	5766122	258620262	515595900	51.7
hv5_s5_1	hv5_54	9217795	848037140	8261755	707351489	8259978		706643710		3943388		345430858		52.3
hv5_s5_2	hv5_54	9283364	854069488	8280466	708080910	8271928	16531906	706786128	1413429838	3980669	7924057	348210229	693641087	51.9
hv5_s5_1	hv5_55	7471632	687390144	6973468	612798246	6970690		612270804		2992304		266990490		57.1
hv5_s5_2	hv5_55	7473153	687530076	6954075	610564895	6949933	13920623	609895164	1222165968	3002336	5994640	267682524	534673014	56.8
hv5_s5_1	hv5_56	5009446	460869032	4650076	409395837	4649418		409208072		2169485		194135423		53.3
hv5_s5_2	hv5_56	5064168	465903456	4758942	419163318	4756466	9405884	418758643	827966715	2254046	4423531	201411438	395546861	52.6
hv5_s5_1	hv5_57	8217774	756035208	7661178	676169845	7658259		675794584		3896905		348721946		49.1
hv5_s5_2	hv5_57	8204506	754814552	7662792	676057979	7658014	15316273	675480020	1351274604	3925228	7822133	351016395	699738341	48.7
hv5_s5_1	hv5_58	6831685	628515020	6372998	560992590	6351582		559445897		3282685		293124476		48.3
hv5_s5_2	hv5_58	6849168	630123456	6412369	564005437	6386938	12738520	562070066	1121515963	3329471	6612156	296888734	590013210	47.9
hv5_s5_1	hv5_59	4901299	450919508	4553481	399091588	4552267		398838409		2263241		201407953		50.3
hv5_s5_2	hv5_59	4929035	453471220	4603143	403169085	4600677	9152944	402744871	801583280	2313983	4577224	205529517	406937470	49.7
hv5_s5_1	hv5_60	5270096	484848832	5005747	444383045	5003330		444019788		3370206		301534393		32.6
hv5_s5_2	hv5_60	5261379	484046868	5000248	443425764	4996818	10000148	442942341	886962129	3376565	6746771	301789476	603323869	32.4
hv5_s5_1	hv5_61	7421406	682769352	6918463	606566600	6917865		606383507		3045345		271205634		56
hv5_s5_2	hv5_61	7440322	684509624	6951900	609950113	6949693	13867558	609605522	1215989029	3078830	6124175	274217020	545422654	55.7
hv5_s5_1	hv5_62	3538566	325548072	3324176	293611982	3323541		293340149		1803529		161376759		45.7
hv5_s5_2	hv5_62	3567299	328191508	3378579	298368489	3375922	6699463	297858764	591198913	1845636	3649165	164922422	326299181	45.3
hv5_s5_1	hv5_63	5964270	548712840	5570046	489583078	5566954		488697649		2452050		218844643		56
hv5_s5_2	hv5_63	5980394	550196248	5584328	489671624	5578163	11145117	488435359	977133008	2486718	4938768	221334513	440179156	55.4
hv5_s5_1	hv5_64	5665681	521242652	5327641	469897691	5321415		469184148		2457181		219967346		53.8
hv5_s5_2	hv5_64	5691694	523635848	5390477	475720481	5382021	10703436	474720570	943904718	2512808	4969989	224805680	444773026	53.3
hv5_s5_1	hv5_65	9248604	850871568	8611066	757634293	8609473		757206638		3751124		335115423		56.4
hv5_s5_2	hv5_65	9244895	850530340	8593469	755048450	8584703	17194176	754059980	1511266618	3764046	7515170	335946156	671061579	56.2
hv5_s6_1	hv5_66	4678167	430391364	4331811	379397310	4327611		378299450		2199548		195245663		49.2
hv5_s6_2	hv5_66	4658661	428596812	4297847	375450723	4292108	8619719	374131800	752431250	2203277	4402825	195072002	390317665	48.7
hv5_s6_1	hv5_67	7401276	680917392	6505353	551882342	6504133		551263796		2806808		244691314		56.8
hv5_s6_2	hv5_67	7487903	688887076	6503493	550083214	6497237	13001370	549035863	1100299659	2839875	5646683	246824619	491515933	56.3
hv5_s6_1	hv5_68	10663582	981049544	9720874	848868110	9716599		848119410		4490904		398689360		53.8
hv5_s6_2	hv5_68	10707155	985058260	9691534	844313709	9685212	19401811	843357435	1691476845	4507744	8998648	399490854	798180214	53.5
hv5_s6_1	hv5_69	5324450	489849400	4897705	429075744	4897355		428835908		2601102		231401801		46.9
hv5_s6_2	hv5_69	5360643	493179156	4947385	433199499	4945597	9842952	432778060	861613968	2651582	5252684	235626463	467028264	46.4
hv5_s6_1	hv5_70	7981645	734311340	7361798	647710571	7361020		647367435		4439694		395402467		39.7
hv5_s6_2	hv5_70	7953549	731726508	7298388	640667950	7296590	14657610	640206464	1287573899	4427154	8866848	393563321	788965788	39.3
hv5_s6_1	hv5_71	9211598	847467016	8447534	740254621	8441627		739682435		4499284		400010748		46.7
hv5_s6_2	hv5_71	9219934	848233928	8414049	735508511	8405387	16847014	734678545	1474360980	4512900	9012184	400419542	800430290	46.3
hv5_s6_1	hv5_72	7157213	658463596	6540843	570136101	6540202		569969503		3226265		286081289		50.7
hv5_s6_2	hv5_72	7183798	660909416	6555513	570024122	6553763	13093965	569723686	1139693189	3267542	6493807	289012924	575094213	50.1
hv5_s6_1	hv5_73	8245188	758557296	7650489	671300963	7650065		671064782		3486196		310956567		54.4
hv5_s6_2	hv5_73	8225918	756784456	7582312	663211995	7581230	15231295	662895642	1333960424	3485002	6971198	310128827	621085394	54
hv5_s6_1	hv5_74	6096273	560857116	5628061	490479322	5627360		489906677		2360624		209465854		58.1
hv5_s6_2	hv5_74	6105022	561662024	5607375	488259475	5605864	11233224	487559579	977466256	2369800	4730424	210116538	419582392	57.7
hv5_s6_1	hv5_75	3557008	327244736	3292862	288670787	3292485		288514490		1598244		142566052		51.5
hv5_s6_2	hv5_75	3588368	330129856	3323829	290826616	3321546	6614031	290487753	579002243	1630557	3228801	145050248	287616300	50.9
hv5_s6_1	hv5_76	14159646	1302687432	12722360	1110278720	12720516		1108654693		5659397		502382823		55.5
hv5_s6_2	hv5_76	14148412	1301653904	12681587	1103567656	12674960	25395476	1101486514	2210141207	5688984	11348381	503940437	1006323260	55.1
hv5_s6_1	hv5_77	9913345	912027740	9032886	790735901	8985232		782872536		4446889		393633998		50.5
hv5_s6_2	hv5_77	10055527	925108484	9259920	810725194	9205239	18190471	801025036	1583897572	4635489	9082378	409048428	802682426	49.6
hv5_s6_1	hv5_78	7634258	702351736	6996804	610194851	6990230		606279899		3153543		278418423		54.9
hv5_s6_2	hv5_78	7670329	705670268	6973614	605675076	6948736	13938966	600104502	1206384401	3173576	6327119	279024664	557443087	54.3
hv5_s7_1	hv5_79	4516599	415527108	4275014	377753646	4273825		377386252		2346845		209877850		45.1
hv5_s7_2	hv5_79	4493795	413429140	4258079	376378093	4255917	8529742	375896497	753282749	2352970	4699815	210419961	420297811	44.7
hv5_s7_1	hv5_80	6049000	556508000	5494476	469066662	5493267		468701635		2335218		204560521		57.5
hv5_s7_2	hv5_80	6062384	557739328	5464438	466513208	5458825	10952092	465794949	934496584	2341960	4677178	205086215	409646736	57.1
hv5_s7_1	hv5_81	7217598	664019016	6768953	595364125	6764558		594083379		3303931		294283717		51.2
hv5_s7_2	hv5_81	7213123	663607316	6741819	593065294	6735497	13500055	591542877	1185626256	3309107	6613038	294666230	588949947	50.9
hv5_s7_1	hv5_82	7907250	727467000	7313386	643839792	7311175		642960777		3640387		325130052		50.2
hv5_s7_2	hv5_82	7987881	734885052	7483428	659772816	7478116	14789291	658470008	1301430785	3775890	7416277	336964667	662094719	49.5
hv5_s7_1	hv5_83	4585885	421901420	4317221	380354276	4316336		380013941		2049387		183223626		52.5
hv5_s7_2	hv5_83	4568489	420300988	4306251	379586769	4304565	8620901	379141038	759154979	2061402	4110789	184278351	367501977	52.1
hv5_s7_1	hv5_84	9382617	863200764	8758527	771623476	8750763		770707785		4743310		423147672		45.8
hv5_s7_2	hv5_84	9384940	863414480	8764971	772162695	8752545	17503308	770813702	1541521487	4774667	9517977	425747953	848895625	45.4
hv5_s7_1	hv5_85	6263017	576197564	5824685	509393461	5822591		508605126		2518511		223936862		56.7
hv5_s7_2	hv5_85	6288849	578574108	5859317	512252084	5855619	11678210	511212147	1019817273	2572919	5091430	228357387	452294249	56.1
hv5_s7_1	hv5_86	6531909	600935628	6175727	544132893	6173762		543470124		2790807		249282966		54.8
hv5_s7_2	hv5_86	6509964	598916688	6137052	540315106	6134079	12307841	539502090	1082972214	2797547	5588354	249664075	498947041	54.4
hv5_s7_1	hv5_87	4775438	439340296	4508862	395684201	4507792		395003792		2072001		184450896		54
hv5_s7_2	hv5_87	4772079	439031268	4495240	394954043	4493272	9001064	394129983	789133775	2079901	4151902	185237640	369688536	53.7
hv5_s7_1	hv5_88	3978628	366033776	3765547	333641261	3765264		333483569		2428366		217343326		35.5
hv5_s7_2	hv5_88	3996351	367664292	3794855	336228019	3792952	7558216	335910846	669394415	2457507	4885873	219742033	437085359	35.2
hv5_s7_1	hv5_89	10085943	927906756	9367959	823407541	9357805		820600497		4302267		383149185		54
hv5_s7_2	hv5_89	10097181	928940652	9382623	824075481	9367259	18725064	820541158	1641141655	4353125	8655392	387082471	770231656	53.5
hv5_s7_1	hv5_90	5059336	465458912	4776741	421659257	4773056		421231064		2296529		205703289		51.9
hv5_s7_2	hv5_90	5072737	466691804	4812296	425084339	4807063	9580119	424467156	845698220	2337830	4634359	209329576	415032865	51.4
hv5_s7_1	hv5_91	6086009	559912828	5730025	503402100	5728152		502345027		2407594		214675299		58
hv5_s7_2	hv5_91	6073207	558735044	5696032	500056685	5690535	11418687	498631092	1000976119	2411867	4819461	214869643	429544942	57.6
	TOTAL	1131202798	104070657416	1046775854	91976104596		1045769237		91785955250		502988846		44793077993
	AVERAGE	6.08174e+06	5.5952e+08	5.62783e+06	494495186		1.1492e+07		1.00864e+09		5.52735e+06		4.92232e+08	51.4478
	MIN	1622407	149261444	1524915	135425599		4914458		432658945		2471316		220819284	26
	MAX	14159646	1302687432	12722360	1110278720		25395476		2210141207		11348381		1006323260	90.3
	read length		92		87.8661				87.7688				89.0538
													156.619

## Sheet: HV6-multiplex_counts_detail_v14
Lane	Pool	# Seq after Demultiplex	Bases after Demultiplex	# Seq after Quality Trim	Bases after Quality Trim	# Seq after Adapter removal	Column G (left+right mate)	Bases after Adapter Removal	Column I (left+right mate)	# Seq after E coli removal	Column K (left+right mate)	Bases after E coli removal	Column M (left+right mate)	% E coli
hv6_s1_1	hv6_01	4393988	404246896	4054539	356763403	4051324		356001590		1507993		134980040		62.8
hv6_s1_2	hv6_01	4468326	411085992	4235033	372881092	4219925	8271249	370828824	726830414	1678840	3186833	149127993	284108033	60.2
hv6_s1_1	hv6_02	6277801	577557692	5715212	493196296	5713445		492567695		2983815		262441145		47.8
hv6_s1_2	hv6_02	6348988	584106896	5749060	495084009	5738635	11452080	493654648	986222343	3036058	6019873	266158157	528599302	47.1
hv6_s1_1	hv6_03	5209320	479257440	4889316	431367373	4883788		430407438		2292235		204788175		53.1
hv6_s1_2	hv6_03	5230196	481178032	4905545	431891605	4894128	9777916	430396167	860803605	2329736	4621971	207399133	412187308	52.4
hv6_s1_1	hv6_04	4879340	448899280	4312264	376614466	4310131		376337880		1257086		112315719		70.8
hv6_s1_2	hv6_04	5030382	462795144	4701124	411659717	4685318	8995449	409909328	786247208	1577810	2834896	139090148	251405867	66.3
hv6_s1_1	hv6_05	5809248	534450816	5277538	463224360	5272509		462480953		1655552		148108908		68.6
hv6_s1_2	hv6_05	5871513	540179196	5497534	482444123	5479054	10751563	480369117	942850070	1856873	3512425	164804486	312913394	66.1
hv6_s1_1	hv6_06	5466884	502953328	5011697	439813034	5006146		438960138		1527055		136480471		69.5
hv6_s1_2	hv6_06	5575497	512945724	5220408	456648917	5187165	10193311	453360485	892320623	1707834	3234889	150929857	287410328	67.1
hv6_s1_1	hv6_07	5160273	474745116	4605367	403507579	4603487		403120215		2133595		190437763		53.7
hv6_s1_2	hv6_07	5314552	488938784	4940670	432657976	4929942	9533429	431256287	834376502	2409823	4543418	212958277	403396040	51.1
hv6_s1_1	hv6_08	5076415	467030180	4739445	418942750	4737570		418552023		2266651		203202083		52.2
hv6_s1_2	hv6_08	5113991	470487172	4868136	430516879	4858657	9596227	429364791	847916814	2396881	4663532	214048108	417250191	50.7
hv6_s1_1	hv6_09	8888971	817785332	7662808	667162720	7658376		666587216		2487177		221601511		67.5
hv6_s1_2	hv6_09	9364883	861569236	8324369	721530906	8296710	15955086	718928068	1385515284	3014906	5502083	262770875	484372386	63.7
hv6_s1_1	hv6_10	5914380	544122960	5096991	447590078	5091300		446845128		2062229		184697181		59.5
hv6_s1_2	hv6_10	6325779	581971668	5842516	509787346	5803198	10894498	505963647	952808775	2593675	4655904	228102241	412799422	55.3
hv6_s1_1	hv6_11	7403379	681110868	6561190	572946315	6546183		570602354		2390390		212899329		63.5
hv6_s1_2	hv6_11	7670211	705659412	7044299	610802316	6992347	13538530	605059515	1175661869	2803399	5193789	245357205	458256534	59.9
hv6_s1_1	hv6_12	4051851	372770292	3637008	319198429	3627118		318179084		1742510		155880462		52
hv6_s1_2	hv6_12	4191218	385592056	3936989	344930887	3914061	7541179	342633509	660812593	2000899	3743409	177120258	333000720	48.9
hv6_s1_1	hv6_13	3623914	333400088	3349229	292910056	3346489		292578434		710083		63475164		78.8
hv6_s1_2	hv6_13	3690578	339533176	3471424	303292611	3457254		302004913		813760		71994102		76.5
bac_redo_04_HV6_13_1	hv6_13	5633169	518251548	4153929	350998720	4149411		350379738		839933		73718450		79.8
bac_redo_04_HV6_13_2	hv6_13	6115248	562602816	5706608	503631285	5696523	16649677	502378393	1447341478	2091897	4455673	184036931	393224647	63.3
hv6_s2_1	hv6_14	4582139	421556788	4162248	363926366	4157960		363209952		1311669		117003794		68.5
hv6_s2_2	hv6_14	4654865	428247580	4311666	375834027	4296722	8454682	374049141	737259093	1474840	2786509	130132843	247136637	65.7
hv6_s2_1	hv6_15	4995439	459580388	4263950	361374533	4261519		360722588		1349242		117922681		68.3
hv6_s2_2	hv6_15	5181753	476721276	4416858	372762720	4403374	8664893	371131069	731853657	1506788	2856030	129890643	247813324	65.8
hv6_s2_1	hv6_16	8412248	773926816	7753770	680815742	7750330		680323157		3107158		277299148		59.9
hv6_s2_2	hv6_16	8422435	774864020	7703345	673580371	7689626	15439956	672273252	1352596409	3156295	6263453	280017821	557316969	59
hv6_s2_1	hv6_17	5857098	538853016	5066479	440788291	5063986		440454612		1610928		143548761		68.2
hv6_s2_2	hv6_17	6074990	558899080	5516816	478940690	5498678	10562664	476978002	917432614	1988688	3599616	174314691	317863452	63.8
hv6_s2_1	hv6_18	5657611	520500212	5220835	458581989	5216636		457896423		1999248		178683043		61.7
hv6_s2_2	hv6_18	5661728	520878976	5243623	459142460	5232311	10448947	457701011	915597434	2077180	4076428	184642831	363325874	60.3
hv6_s2_1	hv6_19	7995500	735586000	7129743	622737891	7125628		621936056		2309632		205869902		67.6
hv6_s2_2	hv6_19	8174647	752067524	7465782	649294049	7439760	14565388	646546635	1268482691	2633529	4943161	231613179	437483081	64.6
hv6_s2_1	hv6_20	5412051	497908692	4514871	388850674	4511443		388303261		1039479		91863351		77
hv6_s2_2	hv6_20	5725402	526736984	5047969	432827833	5031123	9542566	430777428	819080689	1481644	2521123	127249164	219112515	70.6
hv6_s2_1	hv6_21	5271239	484953988	4571254	396279705	4567248		395203614		1177663		104327876		74.2
hv6_s2_2	hv6_21	5471413	503369996	5055301	439328229	5039199	9606447	436931162	832134776	1614072	2791735	140860106	245187982	68
hv6_s2_1	hv6_22	5848430	538055560	5129773	445523184	5126623		444519462		1416365		125728715		72.4
hv6_s2_2	hv6_22	6154355	566200660	5422755	468635360	5406096	10532719	466362592	910882054	1665262	3081627	144868435	270597150	69.2
hv6_s2_1	hv6_23	3980402	366196984	3355302	292917624	3352215		292501752		1228441		109648748		63.4
hv6_s2_2	hv6_23	4301544	395742048	3913766	339007871	3887479	7239694	336539212	629040964	1625282	2853723	141814373	251463121	58.2
hv6_s2_1	hv6_24	9112028	838306576	7863961	683056215	7856835		682279572		2267101		202104578		71.1
hv6_s2_2	hv6_24	9554291	878994772	8687380	751784336	8643194	16500029	747901665	1430181237	2945795	5212896	256797639	458902217	65.9
hv6_s2_1	hv6_25	4485799	412693508	3849293	334933156	3831164		333520226		1163438		103823445		69.6
hv6_s2_2	hv6_25	4735537	435669404	4379035	380545582	4336510	8167674	376808057	710328283	1584250	2747688	138542576	242366021	63.5
hv6_s2_1	hv6_26	10341556	951423152	9297085	813325874	9292020		812493645		2787977		248838001		70
hv6_s2_2	hv6_26	10666337	981303004	9713063	845923189	9683433	18975453	842878629	1655372274	3165487	5953464	278758323	527596324	67.3
hv6_s3_1	hv6_27	4753659	437336628	4306566	372986412	4299773		372257301		1475520		130909709		65.7
hv6_s3_2	hv6_27	4795470	441183240	4477983	388990083	4459495	8759268	387096120	759353421	1665760	3141280	146661225	277570934	62.6
hv6_s3_1	hv6_28	6579958	605356136	5410421	453260474	5408100		452846811		2445885		211787719		54.8
hv6_s3_2	hv6_28	6836933	628997836	5642356	470553418	5630217	11038317	469297585	922144396	2667079	5112964	227637056	439424775	52.6
hv6_s3_1	hv6_29	5390719	495946148	4929774	428911253	4926281		428298967		2423774		214803748		50.8
hv6_s3_2	hv6_29	5417532	498412944	4997843	435017443	4986513	9912794	433726076	862025043	2510927	4934701	221412225	436215973	49.6
hv6_s3_1	hv6_30	5713794	525669048	4106470	341229622	4103409		340561051		1149108		100157311		72
hv6_s3_2	hv6_30	6175789	568172588	5536378	472603207	5519792	9623201	470314657	810875708	2307125	3456233	196222171	296379482	58.2
hv6_s3_1	hv6_31	5896311	542460612	4938715	423395785	4933954		422503818		1647791		145893124		66.6
hv6_s3_2	hv6_31	6049948	556595216	5576839	482930966	5559962	10493916	480779227	903283045	2208343	3856134	192830217	338723341	60.3
hv6_s3_1	hv6_32	6396682	588494744	5311485	453659325	5305283		452770727		1419826		125119933		73.2
hv6_s3_2	hv6_32	6688965	615384780	6025401	514640381	5987593	11292876	510986499	963757226	2044673	3464499	174812533	299932466	65.9
hv6_s3_1	hv6_33	5505673	506521916	4363940	369307777	4359691		368801842		1392843		122193146		68.1
hv6_s3_2	hv6_33	5845111	537750212	5166118	439810901	5148978	9508669	437806970	806608812	2080182	3473025	177459029	299652175	59.6
hv6_s3_1	hv6_34	6170561	567691612	5478491	471797348	5472036		470165366		1551107		136670348		71.7
hv6_s3_2	hv6_34	6295583	579193636	5842039	505861994	5819811	11291847	502369855	972535221	1948362	3499469	169802604	306472952	66.5
hv6_s3_1	hv6_35	3652032	335986944	2979745	254344012	2976878		253919292		918984		80932019		69.1
hv6_s3_2	hv6_35	3961650	364471800	3361717	285623083	3346611	6323489	284027423	537946715	1226100	2145084	104514669	185446688	63.4
hv6_s3_1	hv6_36	4099353	377140476	3262677	280584751	3257091		279936290		1196601		105990175		63.3
hv6_s3_2	hv6_36	4498027	413818484	4086256	349843875	4043329	7300420	345821701	625757991	1806191	3002792	155475916	261466091	55.3
hv6_s3_1	hv6_37	3918651	360515892	2811922	233876770	2806769		233389999		605839		52727543		78.4
hv6_s3_2	hv6_37	4359014	401029288	3822219	319206762	3796119	6602888	316927696	550317695	1410478	2016317	116297490	169025033	62.8
hv6_s3_1	hv6_38	5703789	524748588	4833653	418490523	4824778		417378315		2252647		200228036		53.3
hv6_s3_2	hv6_38	6033792	555108864	5589246	484904912	5566788	10391566	482370409	899748724	2851319	5103966	249497914	449725950	48.8
hv6_s3_1	hv6_39	6527295	600511140	5872245	511895880	5869668		511388169		2772417		246690891		52.8
hv6_s3_2	hv6_39	6773095	623124740	6282329	546780716	6264523	12134191	544862052	1056250221	3121767	5894184	274739369	521430260	50.2
hv6_s4_1	hv6_40	4295312	395168704	3804688	329017761	3798496		328294725		1818662		161516880		52.1
hv6_s4_2	hv6_40	4387871	403684132	4146487	361998973	4130113	7928609	360250001	688544726	2125317	3943979	187413972	348930852	48.5
hv6_s4_1	hv6_41	6144216	565267872	4183224	338884642	4179348		338398278		1120776		95796687		73.2
hv6_s4_2	hv6_41	6758969	621825148	5127512	418848460	5107972	9287320	417041929	755440207	1813896	2934672	149595651	245392338	64.5
hv6_s4_1	hv6_42	5960650	548379800	4981721	424413129	4973856		423471950		1445173		126802214		70.9
hv6_s4_2	hv6_42	6260258	575943736	5616456	481505096	5597443	10571299	479539039	903010989	1952024	3397197	167769135	294571349	65.1
hv6_s4_1	hv6_43	3135486	288464712	2289271	191099773	2286549		190651873		686397		59884897		70
hv6_s4_2	hv6_43	3368022	309858024	3040135	259012913	3026501	5313050	257235246	447887119	1277501	1963898	108674341	168559238	57.8
hv6_s4_1	hv6_44	4355985	400750620	3097652	256985988	3094423		256576800		1046759		91698250		66.2
hv6_s4_2	hv6_44	4581938	421538296	4205356	360356603	4195354	7289777	359179014	615755814	1918734	2965493	165066502	256764752	54.3
hv6_s4_1	hv6_45	4302730	395851160	3065404	254700284	3060981		254210558		808289		70404342		73.6
hv6_s4_2	hv6_45	4642134	427076328	4139802	349291369	4122638	7183619	347600600	601811158	1673359	2481648	140422673	210827015	59.4
hv6_s4_1	hv6_46	3756609	345608028	2469766	202019727	2466807		201709070		551935		47450355		77.6
hv6_s4_2	hv6_46	4197054	386128968	3588911	300218902	3577947	6044754	298989304	500698374	1426668	1978603	118105262	165555617	60.1
hv6_s4_1	hv6_47	6345862	583819304	5750539	497789435	5740014		496293966		2022585		178834393		64.8
hv6_s4_2	hv6_47	6464207	594707044	6062615	526893934	6030678	11770692	523094888	1019388854	2332902	4355487	204532431	383366824	61.3
hv6_s4_1	hv6_48	3769845	346825740	2659595	220577582	2655807		220077086		845519		73605117		68.2
hv6_s4_2	hv6_48	4518085	415663820	3813953	318565489	3795355	6451162	316357361	536434447	1678857	2524376	139099365	212704482	55.8
hv6_s4_1	hv6_49	3787141	348416972	2592878	218546902	2587286		217924214		717529		62892462		72.3
hv6_s4_2	hv6_49	4425437	407140204	4024249	341677433	3984079	6571365	337852778	555776992	1751112	2468641	148169832	211062294	56
hv6_s4_1	hv6_50	4179585	384521820	3289800	277546387	3283479		276738739		458222		39807913		86
hv6_s4_2	hv6_50	4512776	415175392	4062575	342583607	4029239	7312718	339330043	616068782	1101994	1560216	90912466	130720379	72.7
hv6_s4_1	hv6_51	3649511	335755012	3135858	268782990	3122382		267479125		428478		37591529		86.3
hv6_s4_2	hv6_51	3859330	355058360	3591805	308787610	3556257		305269799		821114		69776917		76.9
bac_redo_04_HV6_51_1	hv6_51	15542808	1429938336	14663874	1307758195	14643585		1304955530		6899030		618562684		52.9
bac_redo_04_HV6_51_2	hv6_51	15568668	1432317456	14451172	1285129847	14433904	35756128	1282648090	3160352544	6916718	15065340	617978701	1343909831	52.1
hv6_s4_1	hv6_52	4443400	408792800	3796354	325511532	3792586		324817462		833816		73421817		78
hv6_s4_2	hv6_52	4779273	439693116	4419452	379560388	4394131	8186717	376804681	701622143	1353897	2187713	115731802	189153619	69.2
hv6_s5_1	hv6_53	3053470	280919240	2467372	207681216	2463649		207090205		651149		57030367		73.6
hv6_s5_2	hv6_53	3218294	296083048	2979882	256436274	2965153	5428802	254701461	461791666	1108291	1759440	95410161	152440528	62.6
hv6_s5_1	hv6_54	6221182	572348744	4738027	386621026	4732311		385690668		619461		52902439		86.9
hv6_s5_2	hv6_54	6765412	622417904	5144501	418606155	5114113	9846424	415530597	801221265	1050487	1669948	85772932	138675371	79.5
hv6_s5_1	hv6_55	6190608	569535936	5459421	468894974	5448267		467675045		1859777		163815204		65.9
hv6_s5_2	hv6_55	6332805	582618060	5662802	486931915	5634203	11082470	484221910	951896955	2088855	3948632	181572916	345388120	62.9
hv6_s5_1	hv6_56	4425892	407182064	3485396	293815408	3482387		293290673		864779		75762847		75.2
hv6_s5_2	hv6_56	4735218	435640056	4240171	361718236	4222787	7705174	359574540	652865213	1511295	2376074	128645771	204408618	64.2
hv6_s5_1	hv6_57	4853913	446559996	3953264	335609951	3947780		334915716		1095037		96460657		72.3
hv6_s5_2	hv6_57	5025283	462326036	4568907	392828709	4550544	8498324	390811166	725726882	1652873	2747910	142911955	239372612	63.7
hv6_s5_1	hv6_58	6072385	558659420	5006935	425529718	5000768		424665642		1510977		132944660		69.8
hv6_s5_2	hv6_58	6388734	587763528	5775143	493088754	5738644	10739412	489631612	914297254	2194002	3704979	187668977	320613637	61.8
hv6_s5_1	hv6_59	4237358	389836936	3088681	257658193	3084617		257138598		909632		79208078		70.5
hv6_s5_2	hv6_59	4648693	427679756	4016172	339059596	4001327	7085944	337178164	594316762	1667724	2577356	140254188	219462266	58.3
hv6_s5_1	hv6_60	9089394	836224248	7320199	613805781	7311975		612875733		961669		82838656		86.8
hv6_s5_2	hv6_60	9602852	883462384	8770266	753203365	8728820	16040795	748870184	1361745917	2885507	3847176	242028968	324867624	66.9
hv6_s5_1	hv6_61	4452767	409654564	3646623	310879249	3643198		310424658		1908755		163747390		47.6
hv6_s5_2	hv6_61	4872788	448296496	4138401	351893356	4117989	7761187	349889520	660314178	2235718	4144473	190239515	353986905	45.7
hv6_s5_1	hv6_62	3711302	341439784	2576484	220026279	2572547		219556040		1293315		114366061		49.7
hv6_s5_2	hv6_62	4362423	401342916	3892739	331632869	3863668	6436215	328903946	548459986	2213445	3506760	189976125	304342186	42.7
hv6_s5_1	hv6_63	7929632	729526144	6132709	514306734	6125063		513219278		1725587		151261877		71.8
hv6_s5_2	hv6_63	8673427	797955284	7727998	652617949	7689964	13815027	648897269	1162116547	3624731	5350318	300343364	451605241	52.9
hv6_s5_1	hv6_64	4810553	442570876	3833680	326941488	3819092		325529815		1860962		160402847		51.3
hv6_s5_2	hv6_64	5296624	487289408	4878489	420237527	4844844	8663936	416855535	742385350	2557614	4418576	221395891	381798738	47.2
hv6_s5_1	hv6_65	4146210	381451320	3502163	299777209	3498927		299382170		902188		79681167		74.2
hv6_s5_2	hv6_65	4518825	415731900	4082784	349197435	4062603	7561530	347339082	646721252	1572944	2475132	132610940	212292107	61.3
hv6_s6_1	hv6_66	5142396	473100432	4435328	382220404	4430483		381311760		1912486		169466910		56.8
hv6_s6_2	hv6_66	5311630	488669960	4929015	427083994	4912684	9343167	424842209	806153969	2352075	4264561	205842103	375309013	52.1
hv6_s6_1	hv6_67	6362533	585353036	4862916	401878374	4858377		401092411		1525528		131420485		68.6
hv6_s6_2	hv6_67	6863796	631469232	5344827	439819179	5321940	10180317	437367929	838460340	1941792	3467320	162949785	294370270	63.5
hv6_s6_1	hv6_68	5843527	537604484	5176566	445223329	5169164		444187560		1326841		116800218		74.3
hv6_s6_2	hv6_68	5992367	551297764	5410601	465471901	5387444	10556608	463054415	907241975	1568574	2895415	135858999	252659217	70.9
hv6_s6_1	hv6_69	5404926	497253192	4165635	353403060	4161667		352787107		1500887		132225156		63.9
hv6_s6_2	hv6_69	5822405	535661260	5224596	446695436	5199634	9361301	443681094	796468201	2339405	3840292	200738218	332963374	55
hv6_s6_1	hv6_70	5440663	500540996	4557469	389290660	4550622		388183066		925525		81501247		79.7
hv6_s6_2	hv6_70	5622033	517227036	5139750	441710764	5118248	9668870	438909156	827092222	1445486	2371011	124428378	205929625	71.8
hv6_s6_1	hv6_71	7079440	651308480	5892316	505480771	5883912		504247311		2027178		178986768		65.5
hv6_s6_2	hv6_71	7442047	684668324	6708417	573907388	6666083	12549995	569565906	1073813217	2706245	4733423	232845957	411832725	59.4
hv6_s6_1	hv6_72	5458827	502212084	3890475	325412168	3886160		324785154		1221392		106687750		68.6
hv6_s6_2	hv6_72	6023528	554164576	5119057	430269018	5101312	8987472	427958112	752743266	2182831	3404223	183487872	290175622	57.2
hv6_s6_1	hv6_73	4388373	403730316	3736250	318866833	3732932		318312542		823370		72399145		77.9
hv6_s6_2	hv6_73	4530880	416840960	4195089	361199476	4181523	7914455	359512606	677825148	1259397	2082767	108786699	181185844	69.9
hv6_s6_1	hv6_74	4807689	442307388	4041503	346384884	4037838		345677073		1275097		112421228		68.4
hv6_s6_2	hv6_74	5172361	475857212	4490347	383063356	4472453	8510291	380959970	726637043	1630301	2905398	139858843	252280071	63.5
hv6_s6_1	hv6_75	4278778	393647576	3033494	254905852	3024743		254145823		744823		65147910		75.4
hv6_s6_2	hv6_75	4999367	459941764	4574438	389643186	4506423	7531166	383820893	637966716	1753077	2497900	148672150	213820060	61.1
hv6_s6_1	hv6_76	5599142	515121064	4781836	408937923	4773652		407865399		1148434		101305251		75.9
hv6_s6_2	hv6_76	5914484	544132528	5400256	460473812	5357464	10131116	456355830	864221229	1693621	2842055	144311363	245616614	68.4
hv6_s6_1	hv6_77	4309698	396492216	3691673	319721574	3683057		319021642		1818792		161833770		50.6
hv6_s6_2	hv6_77	4555269	419084748	4268989	371239385	4244392	7927449	369022022	688043664	2275490	4094282	199720118	361553888	46.4
hv6_s6_1	hv6_78	4285928	394305376	3595660	308019880	3589663		307367900		907835		80273700		74.7
hv6_s6_2	hv6_78	4725469	434743148	4282444	365318461	4248110	7837773	362088579	669456479	1449265	2357100	123527993	203801693	65.9
hv6_s7_1	hv6_79	5661383	520847236	4912064	419577525	4905630		418768064		1357059		119744534		72.3
hv6_s7_2	hv6_79	5792714	532929688	5307453	456764526	5284624	10190254	454302510	873070574	1776827	3133886	154354562	274099096	66.4
hv6_s7_1	hv6_80	6293539	579005588	4790151	393909548	4786896		393378887		1605811		138179133		66.5
hv6_s7_2	hv6_80	6716590	617926280	5154076	422795301	5137357	9924253	421100334	814479221	1967341	3573152	165085520	303264653	61.7
hv6_s7_1	hv6_81	5248305	482844060	4505350	382523812	4496169		381207195		937205		81727087		79.2
hv6_s7_2	hv6_81	5362595	493358740	4722031	401592993	4698330	9194499	399030356	780237551	1181385	2118590	100750804	182477891	74.9
hv6_s7_1	hv6_82	7323045	673720140	5021412	412176229	5014852		410329971		1317404		113458094		73.7
hv6_s7_2	hv6_82	8119897	747030524	7045563	594642758	7021906	12036758	589244341	999574312	2981728	4299132	249113286	362571380	57.5
hv6_s7_1	hv6_83	6914846	636165832	5758063	486418261	5721093		483184071		1444735		126803707		74.7
hv6_s7_2	hv6_83	7156383	658387236	6491818	557286339	6422645	12143738	550375888	1033559959	2107016	3551751	181872129	308675836	67.2
hv6_s7_1	hv6_84	5755383	529495236	4559824	385638745	4534111		383809282		1086353		95166126		76
hv6_s7_2	hv6_84	6020564	553891888	5240516	441319622	5174149	9708260	436014791	819824073	1708467	2794820	143642392	238808518	67
hv6_s7_1	hv6_85	5917438	544404296	4410236	365010413	4403364		364145712		806688		69489769		81.7
hv6_s7_2	hv6_85	6467717	595029964	5552272	466858453	5528714	9932078	463799587	827945299	1772455	2579143	147113430	216603199	67.9
hv6_s7_1	hv6_86	5168542	475505864	4294658	363247334	4284130		361380040		1496240		131051110		65.1
hv6_s7_2	hv6_86	5357326	492873992	4907298	422339122	4888890	9173020	419205026	780585066	2083427	3579667	180268992	311320102	57.4
hv6_s7_1	hv6_87	4091302	376399784	2985030	250122272	2978471		249462158		816111		71154265		72.6
hv6_s7_2	hv6_87	4684012	430929104	3700558	308059376	3681613	6660084	306213767	555675925	1358164	2174275	112448214	183602479	63.1
hv6_s7_1	hv6_88	4789548	440638416	3112404	259510869	3106040		258788376		738409		64055994		76.2
hv6_s7_2	hv6_88	5629412	517905904	4939069	415758579	4896767	8002807	411487012	670275388	2064764	2803173	172491192	236547186	57.8
hv6_s7_1	hv6_89	8048655	740476260	6263590	523975331	6251172		522495047		1447798		126311329		76.8
hv6_s7_2	hv6_89	8792808	808938336	7715822	646853833	7676100	13927272	642847242	1165342289	2680095	4127893	223178297	349489626	65.1
hv6_s7_1	hv6_90	5334296	490755232	3628452	300055260	3610678		298608923		593970		51123176		83.5
hv6_s7_2	hv6_90	6075722	558966424	5365643	451563211	5327490	8938168	447860256	746469179	1942926	2536896	161472340	212595516	63.5
hv6_s7_1	hv6_91	5861249	539234908	5174900	442881423	5165889		441757516		943366		83134918		81.7
hv6_s7_2	hv6_91	6213636	571654512	5647889	482807932	5597005	10762894	478200982	919958498	1380136	2323502	118038499	201173417	75.3
	TOTAL	1064674187	97950025204	920894401	78989615334		917951263		78660326150		326662460		28460054417
	AVERAGE	5.72405e+06	5.26613e+08	4.95105e+06	4.24675e+08		1.00874e+07		8.64399e+08		3.5897e+06		3.12748e+08	64.9403
	MIN	3053470	280919240	2289271	191099773		5313050		447887119		1560216		130720379	42.7
	MAX	15568668	1432317456	14663874	1307758195		35756128		3160352544		15065340		1343909831	86.9
	read length		92		85.7749				85.6912				87.1237
													99.5107
