# Supplementary material for: Combinatorial Pooling Enables Selective Sequencing of the Barley Gene Space
Source: PLoS Comput Biol. 2013 Apr 4;9(4):e1003010. doi: 10.1371/journal.pcbi.1003010 (PMC3617026; doi:10.1371/journal.pcbi.1003010)
Supplement: Dataset S3 — Excel file Dataset_S3 contains the pool-by-pool statistics of the number of barley HV3, HV4, HV5 and HV6 reads deconvoluted to one BAC (column C), two BACs (column D), and three BACs (column E), as well as the percentage of reads deconvoluted as a fraction of the total number of reads in each pool (column F). For the HV5 tab, columns G-L reports on the paired-end read analysis: for each paired-end read (total is column H – obtained by subtracting the single reads from each pool), we looked at the set of BACs assigned to the left read (set ) and the right read (set ) via deconvolution. The number of paired-end reads for which at least one of and were non-empty is reported in column J. Of these, we compared and : if the number of shared BACs in was equal to the we declared that paired-end read concordant. Column K reports the number of concordant deconvoluted paired-end reads. (XLSX) [file pcbi.1003010.s003.xlsx]

## Sheet: HV3 (k=26)
HV3 Pool	Total reads (counting singles and paired-end as two singles)	Total reads from (B) decovoluted to 1 BAC	Total reads from (B) decovoluted to 2 BAC	Total reads from (B) decovoluted to 3 BAC	Percentage of reads in (B) deconvoluted to 1,2 or 3 BACs
1	16345476	5707665	5397453	203396	0.691844
2	20822344	7412182	7224679	208716	0.712964
3	20088024	7122035	7032456	210342	0.715094
4	17889017	6097505	6210009	308579	0.705242
5	11475836	4155937	3753010	153058	0.70252
6	19287001	7111109	6378901	193988	0.709493
7	9831004	3716854	3162972	105988	0.71059
8	14133239	5241445	4603032	218994	0.712043
9	15905096	5039067	5595192	198750	0.681103
10	9096281	2959104	2617033	97239	0.623703
11	10837824	3770578	3857924	118078	0.714773
12	10613929	3515447	3738271	82089	0.691149
13	20051896	6888454	6009571	187779	0.652597
14	8841810	2869142	3224217	124179	0.703197
15	9100364	2966197	2881219	135284	0.657413
16	7840074	2867964	2590355	101086	0.709101
17	8923918	2964886	2791077	115930	0.657995
18	7992532	2648327	2476321	73874	0.650422
19	12485509	4267383	3810933	107386	0.655616
20	9359316	3569784	2928244	73463	0.702134
21	8533588	3045115	2865862	58031	0.699472
22	11982744	4225245	4197622	122568	0.713145
23	11448577	4148662	3954947	194786	0.724841
24	8353025	2859240	2635102	75003	0.666746
25	8502545	2677318	2503604	65904	0.617089
26	12972678	4152115	4188072	199465	0.65828
27	14434661	4870382	5131352	122033	0.701351
28	14707226	4601120	4690423	129649	0.640583
29	4957146	1496992	1575520	55813	0.631074
30	3171347	689050	638725	25079	0.426587
31	7646645	2773501	2462944	74316	0.694522
32	6379459	2177643	1821027	81966	0.639652
33	9419081	3069249	3074086	135475	0.666605
34	5708818	1862398	1842243	59437	0.659345
35	8214271	2952894	2592244	67450	0.683273
36	8024274	3005815	2579780	77383	0.705731
37	11239562	3752411	3806305	106054	0.681946
38	10725337	3540393	3709472	171186	0.691918
39	8089241	2720022	2511969	91898	0.658144
40	5276809	1648459	1704868	48074	0.644594
41	7354907	2137004	2082788	96377	0.586842
42	7780111	2818344	2440948	69630	0.684942
43	12351025	3875895	4089128	125436	0.655044
44	13601429	4114272	4373857	170411	0.63659
45	15941729	5493829	4722889	256573	0.656973
46	19184529	6639573	6396366	173031	0.688522
47	7335880	2654465	2289888	84165	0.685469
48	9649724	3451050	3034229	88907	0.681282
49	5234820	1679069	1597943	62919	0.638022
50	11529029	4024617	3598649	170083	0.675976
51	16307305	5253431	6011680	130077	0.698778
52	11079760	3919110	3641468	86037	0.690143
53	12449218	4133773	4407511	168756	0.699646
54	18289327	6220472	6084451	280569	0.688133
55	22792207	8028682	7523656	220713	0.692037
56	9125269	3172903	2982963	80297	0.683395
57	11952206	4080858	3944534	130627	0.682386
58	7213933	2654715	2373371	51726	0.704167
59	20328904	7410276	6620099	195760	0.699798
60	14765622	5273265	4776469	153016	0.69098
61	6372913	2206444	2264909	39501	0.707817
62	10191391	3546518	3535025	83438	0.703042
63	14521106	4995703	5125251	273626	0.715826
64	12370674	4454925	3934635	214741	0.69554
65	20321634	7211674	6598179	284570	0.693567
66	16628296	5477224	5734381	145932	0.683025
67	14285027	5368020	4420260	103563	0.692462
68	9622013	3496852	3066728	107433	0.693307
69	8076382	2974337	2678500	112662	0.713872
70	18910161	6680195	6514717	258672	0.711447
71	5865792	1899443	2076722	70476	0.689871
72	6177202	2131326	2091950	106565	0.700939
73	6592012	2209899	2327000	86573	0.701375
74	7227110	2339443	2476306	110601	0.681649
75	11465597	4486611	3584594	75017	0.710493
76	9600343	3339194	3199938	113511	0.692959
77	6493035	2345758	2070358	81622	0.692702
78	9475724	3131958	3295655	69911	0.685702
79	11500549	4250828	3754936	142775	0.708535
80	8242200	2788524	2870574	73870	0.695563
81	10887524	3971309	3470064	67215	0.689651
82	18000474	5794972	5722724	183505	0.65005
83	10919475	3867556	3557021	115237	0.690492
84	11046283	3635943	3649551	145271	0.672694
85	17644560	6249613	5734101	226693	0.692021
86	12718397	4729766	4120351	179666	0.709978
87	20816599	7677653	6591320	210415	0.695569
88	8863418	3095337	3005906	103344	0.700022
89	14100031	4785482	4895828	112572	0.6946
90	10216775	3137981	3525446	141496	0.666054
91	15288574	5279639	5057788	240976	0.691916
AVERAGE	1.16419e+07	4.01928e+06	3.83201e+06	132487	0.681382

## Sheet: HV4 (k=26)
HV4 Pool	Total reads (counting singles and paired-end as two singles)	Total reads from (B) decovoluted to 1 BAC	Total reads from (B) decovoluted to 2 BAC	Total reads from (B) decovoluted to 3 BAC	Percentage of reads in (B) deconvoluted to 1,2 or 3 BACs
1	4664070	2444998	186846	4846	0.56532
2	5779494	3191634	179316	4920	0.584112
3	6153681	3400458	219185	3640	0.588799
4	5733930	3163560	246824	4115	0.59549
5	6823508	3791889	263748	4919	0.595083
6	4397700	2494259	156940	2827	0.603503
7	7180546	4213107	241538	3481	0.620862
8	4758040	2727738	194901	3241	0.614934
9	5690965	3139692	219764	3406	0.590912
10	3267245	1664334	121685	2547	0.547423
11	4514924	2397626	204570	3407	0.577109
12	5819757	3122190	182096	3310	0.568339
13	2879019	1433395	101727	2913	0.534222
14	4658966	2577358	175926	3212	0.591654
15	8893870	5062673	321267	5839	0.606011
16	4383163	2449057	156550	2413	0.595009
17	5259682	2848307	227831	3808	0.585576
18	5703139	3267632	234540	3478	0.614688
19	4935208	2774069	180131	3875	0.599382
20	5458731	2976448	250513	3862	0.591863
21	4814098	2745834	175739	2840	0.607469
22	3865093	2117718	134527	2094	0.583256
23	7219068	3946114	273298	5689	0.58527
24	4002862	2156654	123769	3549	0.570585
25	9132354	4894252	358875	10690	0.576392
26	8229906	4583395	321028	5748	0.596625
27	9126538	5416702	385838	4973	0.636333
28	6055652	3371029	242269	4336	0.597398
29	5047167	2830436	203936	3812	0.601958
30	5031905	2963694	194605	3332	0.628317
31	5097468	2997871	176607	2692	0.623284
32	5641945	3159149	239780	4069	0.60316
33	4483592	2501427	173286	2958	0.597216
34	7352372	4144441	253017	4625	0.59873
35	11785581	6557247	446096	9428	0.59503
36	9441262	5123594	341055	7412	0.57959
37	6485275	3069860	192975	7212	0.504226
38	7736215	4420677	275457	5055	0.607686
39	7761722	4401318	319103	5251	0.608843
40	5113153	2901643	181728	2340	0.603485
41	7818537	4430747	361196	6102	0.613676
42	6102588	3650796	236604	3480	0.637579
43	5059478	2908849	216611	4934	0.618719
44	5768495	3301821	247484	4119	0.616005
45	8365302	4728567	334227	4968	0.605807
46	5050430	2853964	158524	3169	0.597109
47	7306306	3985884	247631	4817	0.580092
48	6318383	3221468	205179	5607	0.543217
49	5243776	2787022	168102	4868	0.564477
50	5127666	2823380	202424	3353	0.590748
51	4931301	2835675	201401	2967	0.616479
52	5573053	3202268	219463	3800	0.61466
53	1993950	929864	77267	2291	0.506242
54	3780738	2264874	124650	2077	0.632575
55	8719818	5112864	375480	6125	0.630113
56	5758055	3457029	229632	2872	0.64076
57	5698693	3220227	254637	3498	0.610379
58	8984015	5167202	301109	6687	0.609416
59	16970370	9882661	696919	13262	0.624196
60	6084358	3385523	219574	4691	0.59329
61	11287992	6307320	393875	8795	0.594436
62	3886452	2024036	138078	2486	0.55696
63	5399034	3125175	210489	3082	0.618397
64	6322016	3563068	273996	4647	0.607672
65	3989565	2293455	150765	2565	0.613296
66	9258319	5192715	363305	5550	0.600711
67	7228401	4020101	271898	4645	0.594411
68	3409174	1970211	140740	2171	0.619834
69	3417223	1907448	148700	2391	0.602401
70	9478014	5410990	306584	5988	0.603878
71	11099474	6057189	391079	7722	0.581648
72	4498171	2414375	159354	3573	0.572967
73	11285810	6294220	382276	8193	0.592309
74	8944191	5011232	385339	9471	0.604419
75	8549541	4757550	384145	7872	0.602321
76	6570423	3748138	260044	4434	0.610709
77	11943253	6722989	509013	9600	0.606334
78	6305317	3692585	227229	2785	0.62211
79	7622980	4221229	323784	5924	0.597002
80	8532092	4796680	358319	7376	0.605054
81	7036287	4126889	281664	4604	0.6272
82	7925520	4427851	276944	4953	0.594251
83	7766001	4295483	285709	5708	0.590639
84	9433604	5199837	361929	7028	0.590315
85	11567466	6199370	419074	7818	0.572836
86	7713061	4269213	277515	3990	0.590002
87	8339787	4587985	337798	6988	0.591474
88	8983633	5188447	348467	7113	0.617125
89	6655545	3879399	272732	5155	0.624635
90	8078222	4659411	334941	5294	0.618904
91	7141860	3987717	323273	5669	0.604417
AVERAGE	6.71102e+06	3.75765e+06	257759	4829.02	0.597246

## Sheet: HV5 (k=18)
HV5 Pool	Total reads (counting singles and paired-end as two singles)	Total reads from (B) decovoluted to 1 BAC	Total reads from (B) decovoluted to 2 BAC	Total reads from (B) decovoluted to 3 BAC	Percentage of reads in (B) deconvoluted to 1,2 or 3 BACs
1	8588298	3297857	2025971	46181	0.62527
2	5838315	2309251	1260061	29870	0.616476
3	5162088	2012782	1260890	23763	0.638779
4	4775432	1861064	1058771	21695	0.615971
5	3720423	1450786	855016	16865	0.624302
6	4733035	1780578	1097572	21786	0.612701
7	4268210	1566985	1013967	19440	0.609246
8	3885961	1501172	923561	18334	0.628691
9	4394600	1663480	1031189	22836	0.618374
10	4541704	1701138	1017133	19654	0.602841
11	7845048	3091488	1784028	37471	0.626253
12	4899224	1923033	1065985	20275	0.614239
13	9811586	3829973	2122150	46275	0.611359
14	4165083	1579014	898753	20205	0.599741
15	4946404	2007355	1007838	24786	0.614584
16	3529661	1411677	802130	15457	0.63158
17	4271937	1645165	928791	18024	0.606746
18	6885704	2648504	1603993	35893	0.622796
19	7118903	2804801	1619798	36058	0.626593
20	4436059	1776669	1008679	21423	0.632717
21	6065773	2330971	1401417	29031	0.620105
22	4867587	1868540	1152196	20711	0.624837
23	7194596	2758691	1629372	29453	0.614005
24	5767493	2160183	1363126	29378	0.615985
25	4620823	1745712	1060830	21151	0.611946
26	4474730	1746460	1032965	19835	0.625571
27	2471316	1041639	463152	8732	0.612436
28	5071479	2367902	842619	16471	0.636302
29	2748836	1055098	663398	12622	0.629764
30	3969226	1492723	964852	21527	0.624581
31	3693530	1382191	916979	19982	0.627896
32	4487392	1657876	1108976	26955	0.62259
33	3364217	1242071	826296	15917	0.619545
34	7045775	2726374	1649751	36193	0.626236
35	3602076	1275946	914421	19986	0.613633
36	2496637	880982	553651	11352	0.579173
37	6327525	2315729	1596443	30750	0.623138
38	7830302	2990244	1771279	34521	0.612498
39	6345077	2566640	1457141	26547	0.638342
40	5615565	2113410	1335357	27191	0.618986
41	5621449	2255341	1228891	24633	0.624192
42	4053176	1561161	954700	20001	0.625648
43	3922502	1536747	870817	16630	0.618022
44	3087092	1225727	716548	15038	0.634031
45	3134389	1236723	689637	13632	0.618938
46	15984931	6099423	3619985	81056	0.613106
47	4805295	1822961	1097053	25383	0.612948
48	2485715	936325	536561	10958	0.596949
49	6507436	2358883	1537417	28719	0.603159
50	7345901	2869778	1617623	33995	0.615499
51	4629406	1746831	1083455	20885	0.615883
52	4198962	1600329	1006701	21905	0.626092
53	5766122	2378349	1230011	21484	0.629512
54	7924057	3064165	1792982	39524	0.61795
55	5994640	2367585	1403359	29998	0.634057
56	4423531	1664015	1053277	20481	0.618911
57	7822133	2995203	1908232	45620	0.632699
58	6612156	2619106	1525114	32471	0.631669
59	4577224	1782783	1067329	22638	0.627618
60	6746771	2537378	1637725	30774	0.623391
61	6124175	2396333	1439628	28064	0.630946
62	3649165	1399493	851065	19282	0.622016
63	4938768	1923544	1162955	25011	0.630017
64	4969989	1936128	1160447	23529	0.627789
65	7515170	3038885	1610549	30582	0.622743
66	4402825	1749229	985951	21580	0.626134
67	5646683	2224498	1258419	29730	0.622073
68	8998648	3479670	2118905	41041	0.626718
69	5252684	2108831	1205620	25701	0.635894
70	8866848	3468680	2082087	49187	0.631561
71	9012184	3375611	2122802	45475	0.615155
72	6493807	2509199	1484414	30831	0.619736
73	6971198	2722598	1597022	32032	0.624233
74	4730424	1840248	1104881	23729	0.627609
75	3228801	1306474	723387	14060	0.633028
76	11348381	4264815	2675059	50219	0.615955
77	9082378	3746578	1913535	36170	0.62718
78	6327119	2449634	1426877	27255	0.61699
79	4699815	1974095	893368	15178	0.613352
80	4677178	2009644	877052	17237	0.620873
81	6613038	2516349	1618628	32513	0.630193
82	7416277	2764875	1828696	41289	0.624958
83	4110789	1599060	967932	21853	0.629768
84	9517977	4027368	1906456	33732	0.626977
85	5091430	1922890	1245208	25681	0.627285
86	5588354	2149643	1390748	31565	0.639179
87	4151902	1562577	1005090	22369	0.623819
88	4885873	1960790	1126129	23421	0.636599
89	8655392	3361357	1995755	40154	0.623573
90	4634359	1727307	1132132	24010	0.622189
91	4819461	1778678	1198252	22710	0.622402
AVERAGE	5647710	2.1927e+06	1.29425e+06	26765	0.621913

## Sheet: HV5 (k=22)
HV5 Pool	Total reads (counting singles and paired-end as two singles)	Total reads from (B) decovoluted to 1 BAC	Total reads from (B) decovoluted to 2 BAC	Total reads from (B) decovoluted to 3 BAC	Percentage of reads in (B) deconvoluted to 1,2 or 3 BACs
1	8588298	4025275	1838698	31561	0.686461
2	5838315	2774209	1142674	24903	0.675158
3	5162088	2410260	1174839	19183	0.698222
4	4775432	2250717	961288	15844	0.675928
5	3720423	1754959	789103	12038	0.687046
6	4733035	2153144	1020406	14610	0.673597
7	4268210	1900897	940158	13847	0.668876
8	3885961	1807499	840559	13240	0.684849
9	4394600	2006868	950257	19062	0.677237
10	4541704	2064136	939086	13124	0.664144
11	7845048	3715813	1628291	25190	0.684418
12	4899224	2330398	959959	12870	0.674235
13	9811586	4616426	1939033	36537	0.671858
14	4165083	1900134	817534	14956	0.656079
15	4946404	2395907	904938	20095	0.671385
16	3529661	1693860	735220	11152	0.69135
17	4271937	1970523	850343	11508	0.663019
18	6885704	3200575	1473685	28742	0.68301
19	7118903	3388899	1461965	29701	0.685578
20	4436059	2145978	909388	16934	0.692574
21	6065773	2817573	1291694	19189	0.680615
22	4867587	2256549	1062666	15465	0.685079
23	7194596	3326003	1507862	20014	0.674656
24	5767493	2608354	1257346	22039	0.674078
25	4620823	2117282	963806	13892	0.66979
26	4474730	2086390	956077	14452	0.683152
27	2471316	1220808	415468	6114	0.664581
28	5071479	2702689	749188	13382	0.683284
29	2748836	1273099	612912	10477	0.689924
30	3969226	1848398	879484	14636	0.690945
31	3693530	1700589	835437	13080	0.690154
32	4487392	2044740	1020833	21693	0.687987
33	3364217	1521038	762206	10879	0.681919
34	7045775	3307130	1506966	26508	0.687022
35	3602076	1560883	858281	15624	0.67594
36	2496637	1085417	499992	7519	0.638029
37	6327525	2847496	1478103	20644	0.686879
38	7830302	3610165	1632685	24326	0.672666
39	6345077	3046344	1345986	22688	0.695818
40	5615565	2540520	1239914	18694	0.676535
41	5621449	2685007	1132814	21427	0.682964
42	4053176	1883106	880378	16923	0.685982
43	3922502	1857528	791507	12144	0.678439
44	3087092	1487197	646640	9442	0.694271
45	3134389	1489916	629248	9949	0.679275
46	15984931	7321900	3336160	65631	0.670863
47	4805295	2216300	1000568	17098	0.673001
48	2485715	1132096	484154	7384	0.653186
49	6507436	2864187	1428628	20349	0.662805
50	7345901	3465570	1464720	25394	0.674619
51	4629406	2124447	992914	15445	0.676719
52	4198962	1942353	926075	16327	0.687016
53	5766122	2801004	1127288	16463	0.684126
54	7924057	3707121	1624211	25602	0.676034
55	5994640	2860934	1276240	19766	0.693443
56	4423531	2026522	977744	14677	0.682474
57	7822133	3690334	1738700	31394	0.698074
58	6612156	3176236	1380705	26351	0.693162
59	4577224	2159391	980047	20668	0.690398
60	6746771	3085806	1514854	21187	0.685046
61	6124175	2899780	1320088	19895	0.692299
62	3649165	1710981	781316	12592	0.686428
63	4938768	2344144	1061233	17183	0.692999
64	4969989	2344974	1056579	17742	0.687988
65	7515170	3578209	1496349	30056	0.679241
66	4402825	2110052	898429	16182	0.686982
67	5646683	2703428	1138293	20637	0.684005
68	8998648	4189232	1957948	28681	0.68631
69	5252684	2575183	1082620	17176	0.699638
70	8866848	4194642	1911694	45123	0.693759
71	9012184	4116564	1953896	31557	0.677085
72	6493807	3033116	1366772	20748	0.680746
73	6971198	3272061	1463378	27428	0.683221
74	4730424	2225837	1011189	17477	0.687994
75	3228801	1564810	655879	10702	0.69109
76	11348381	5101884	2504357	36246	0.673443
77	9082378	4431214	1721255	26883	0.680367
78	6327119	2933412	1301000	19402	0.672315
79	4699815	2299830	817904	12247	0.66598
80	4677178	2339982	800375	12564	0.674108
81	6613038	3048096	1497242	20666	0.690455
82	7416277	3416851	1681127	29668	0.691404
83	4110789	1952410	875760	19145	0.692644
84	9517977	4680127	1743703	23877	0.677424
85	5091430	2349969	1143197	19109	0.689841
86	5588354	2641357	1260521	22656	0.70227
87	4151902	1916474	921824	18147	0.687985
88	4885873	2381371	1016903	14631	0.698525
89	8655392	4080362	1825847	28081	0.685618
90	4634359	2129784	1034983	16111	0.686368
91	4819461	2151806	1120688	19109	0.682982
AVERAGE	5647710	2.64531e+06	1.18583e+06	19799.5	0.681731

## Sheet: HV5 (k=26)
HV5 Pool	Total reads (counting singles and paired-end as two singles)	Total reads from (B) decovoluted to 1 BAC	Total reads from (B) decovoluted to 2 BACs	Total reads from (B) decovoluted to 3 BACs	Percentage of reads in (B) deconvoluted to 1,2 or 3 BACs	Total single reads in (B)	Total paired-end in (B)	Paired-end reads for which both ends did not deconvolute	Paired-end reads for which at least one end deconvoluted	Concordant paired-end reads	Percentage of (J) that were concordant
1	8588298	4819809	1361096	22413	0.722299	301912	4143193	633508	3509685	2456908	0.700037
2	5838315	3356009	773496	11241	0.709236	371863	2733226	437585	2295641	1568191	0.683117
3	5162088	2928866	852784	11806	0.734869	159996	2501046	350763	2150283	1492281	0.693993
4	4775432	2719426	655721	9354	0.708732	289078	2243177	331641	1911536	1324823	0.693067
5	3720423	2134539	550159	6554	0.723373	117785	1801319	261442	1539877	1050622	0.682277
6	4733035	2621358	740313	9647	0.712295	191623	2270706	341869	1928837	1306407	0.677303
7	4268210	2296717	684713	9099	0.700652	203414	2032398	327819	1704579	1163872	0.682791
8	3885961	2159752	621167	7954	0.717679	135511	1875225	286308	1588917	1093749	0.688361
9	4394600	2433324	674402	9906	0.709423	179716	2107442	340880	1766562	1219194	0.690151
10	4541704	2495663	665023	8358	0.697765	276068	2132818	330572	1802246	1232687	0.683973
11	7845048	4487909	1139795	14919	0.719259	318398	3763325	569584	3193741	2231721	0.69878
12	4899224	2806989	656867	7383	0.708528	248874	2325175	344737	1980438	1356305	0.684851
13	9811586	5583911	1347428	23039	0.708792	666892	4572347	665664	3906683	2688860	0.688272
14	4165083	2284650	595029	9435	0.693651	196027	1984528	338654	1645874	1125577	0.683878
15	4946404	2857396	635683	13903	0.708996	329934	2308235	379306	1928929	1327251	0.688077
16	3529661	2057522	520255	6564	0.732178	103265	1713198	244829	1468369	1006502	0.685456
17	4271937	2384207	578633	7367	0.695283	295813	1988062	319824	1668238	1169002	0.700741
18	6885704	3898797	1037323	14261	0.718936	282956	3301374	507146	2794228	1942049	0.695022
19	7118903	4070134	1029797	15535	0.718575	291017	3413943	517562	2896381	1998066	0.689849
20	4436059	2596261	631889	9508	0.72985	230089	2102985	284186	1818799	1271709	0.699203
21	6065773	3413895	928178	12544	0.7179	240861	2912456	426910	2485546	1685931	0.678294
22	4867587	2730569	760841	9474	0.719224	188577	2339505	354728	1984777	1362513	0.686482
23	7194596	4015312	1051903	12655	0.706067	402802	3395897	514745	2881152	1976805	0.686116
24	5767493	3134394	917029	12535	0.704632	223605	2771944	461366	2310578	1594729	0.690186
25	4620823	2544742	691088	7881	0.701977	252761	2184031	360679	1823352	1289413	0.707166
26	4474730	2520794	676274	8294	0.716325	194282	2140224	331922	1808302	1262977	0.698433
27	2471316	1450596	261775	3390	0.69427	97694	1186811	203854	982957	676158	0.687882
28	5071479	3102789	477918	10209	0.708061	245407	2413036	397385	2015651	1406822	0.697949
29	2748836	1560722	429857	5518	0.726161	102894	1322971	191392	1131579	782770	0.69175
30	3969226	2251092	632236	8219	0.728491	186328	1891449	247201	1644248	1120340	0.681369
31	3693530	2057050	616615	8083	0.726066	138574	1777478	253038	1524440	1044263	0.685014
32	4487392	2492383	753568	11370	0.725883	192236	2147578	302888	1844690	1270741	0.688864
33	3364217	1853107	563378	6254	0.720149	129873	1617172	245241	1371931	949081	0.691785
34	7045775	4015683	1051878	18413	0.721847	251393	3397191	501480	2895711	1989858	0.687174
35	3602076	1902102	642667	8702	0.708889	203790	1699143	254531	1444612	988125	0.684007
36	2496637	1316800	359575	4450	0.673236	252325	1122156	172934	949222	646457	0.681039
37	6327525	3475027	1089877	13217	0.723525	309993	3008766	400843	2607923	1770148	0.678758
38	7830302	4375684	1084768	15712	0.699355	450534	3689884	587452	3102432	2154884	0.694579
39	6345077	3702940	893985	11375	0.72628	249445	3047816	450061	2597755	1843527	0.709662
40	5615565	3061833	916000	14896	0.711011	308501	2653532	419696	2233836	1596697	0.714778
41	5621449	3240123	761146	8966	0.713381	272189	2674630	414809	2259821	1537507	0.680367
42	4053176	2284961	625217	9521	0.720348	149156	1952010	289542	1662468	1133622	0.681891
43	3922502	2247624	546920	6379	0.714065	239122	1841690	263085	1578605	1098754	0.696028
44	3087092	1789146	460577	5713	0.730602	130284	1478404	204237	1274167	889133	0.697815
45	3134389	1809105	438958	5845	0.71909	172749	1480820	199664	1281156	874123	0.682292
46	5032167	1481743	401135	10960	0.376346	1783721	1624223	518587	1105636	613948	0.555289
47	4805295	2678468	707740	11405	0.707056	194653	2305321	368149	1937172	1324469	0.683713
48	2485715	1369486	346430	4368	0.692068	176011	1154852	178264	976588	660214	0.676041
49	6507436	3487998	1020879	11639	0.694669	521900	2992768	448142	2544626	1744825	0.68569
50	7345901	4152521	1011419	16806	0.705257	346857	3499522	559486	2940036	2028159	0.689842
51	4629406	2570124	712912	8537	0.711014	277480	2175963	314516	1861447	1285525	0.690605
52	4198962	2343768	674626	9985	0.721221	217088	1990937	292871	1698066	1200963	0.707253
53	5766122	3346147	746610	11218	0.711739	164478	2800822	447703	2353119	1602751	0.681118
54	7924057	4435090	1157021	15397	0.707656	393977	3765040	618775	3146265	2121571	0.674314
55	5994640	3447887	908114	12100	0.728668	185048	2904796	432171	2472625	1702305	0.688461
56	4423531	2469629	702317	9724	0.71926	186217	2118657	307653	1811004	1222964	0.675296
57	7822133	4482223	1265902	19130	0.7373	240173	3790980	526573	3264407	2260481	0.692463
58	6612156	3830086	1014000	14148	0.734743	220898	3195629	449123	2746506	1903985	0.693239
59	4577224	2614274	698170	10303	0.725931	175476	2200874	315384	1885490	1288556	0.683406
60	6746771	3768648	1087327	13907	0.721809	188439	3279166	499187	2779979	1889629	0.679728
61	6124175	3533073	955348	12618	0.734963	207601	2958287	400901	2557386	1733853	0.677979
62	3649165	2066678	561530	6632	0.722039	129925	1759620	269344	1490276	1034835	0.694392
63	4938768	2843156	753623	9946	0.730288	166046	2386361	346528	2039833	1416553	0.694446
64	4969989	2824251	749455	11829	0.721437	161049	2404470	366736	2037734	1411859	0.692857
65	7515170	4306217	1002165	15848	0.708464	215148	3650011	606928	3043083	2077658	0.682748
66	4402825	2543969	636442	9883	0.724602	163119	2119853	320649	1799204	1245661	0.69234
67	5646683	3278529	802352	11650	0.724767	345175	2650754	390383	2260371	1546080	0.683994
68	8998648	5067615	1421635	17796	0.723114	343320	4327664	643647	3684017	2482558	0.673873
69	5252684	3133900	752926	9632	0.741803	207624	2522530	334478	2188052	1518821	0.694143
70	8866848	5066050	1364484	23341	0.727866	299872	4283488	635046	3648442	2511432	0.688357
71	9012184	4984935	1405677	20345	0.711366	317252	4347466	700613	3646853	2458253	0.674075
72	6493807	3671420	974582	12897	0.717437	259145	3117331	476332	2640999	1790778	0.678068
73	6971198	3935179	1049687	13507	0.717003	234870	3368164	520241	2847923	1922102	0.674914
74	4730424	2667700	735036	13378	0.722158	177282	2276571	350370	1926201	1323194	0.686945
75	3228801	1891923	446900	5392	0.726033	131211	1548795	227669	1321126	919383	0.695909
76	11348381	6189933	1808781	21952	0.706767	402887	5472747	950383	4522364	3138510	0.693998
77	9082378	5311495	1133613	13325	0.711095	426410	4327984	724254	3603730	2584445	0.717158
78	6327119	3512563	919104	13369	0.702537	259343	3033888	531972	2501916	1731257	0.691972
79	4699815	2730042	524566	7215	0.694032	138325	2280745	409514	1871231	1278315	0.683141
80	4677178	2778343	506951	7824	0.704082	224378	2226400	380789	1845611	1271128	0.68873
81	6613038	3693776	1088443	12793	0.725085	213356	3199841	472541	2727300	1851079	0.678722
82	7416277	4184258	1219432	17039	0.730923	325401	3545438	497784	3047654	2114269	0.693737
83	4110789	2354926	640439	12482	0.731696	129151	1990819	286345	1704474	1178192	0.691235
84	9517977	5551482	1148488	14139	0.705413	301713	4608132	798446	3809686	2656841	0.697391
85	5091430	2858149	844537	10748	0.72935	203960	2443735	334766	2108969	1427742	0.676986
86	5588354	3202475	912971	13387	0.738828	175714	2706320	378863	2327457	1620623	0.696306
87	4151902	2346634	665816	10151	0.728004	138982	2006460	294914	1711546	1169401	0.683243
88	4885873	2861075	710085	7662	0.732484	167037	2359418	324485	2034933	1394569	0.685314
89	8655392	4954952	1273423	18529	0.721736	295112	4180140	656257	3523883	2462415	0.698779
90	4634359	2591877	764120	8811	0.726057	151113	2241623	318342	1923281	1302671	0.677317
91	4819461	2623489	834179	11398	0.719804	147901	2335780	352984	1982796	1337349	0.674476
AVERAGE	5.52735e+06	3.11406e+06	818079	11461.6	0.713002	253928	2636711	404864	2.23185e+06	1.53553e+06	0.687021

## Sheet: HV5 (k=30)
HV5 Pool	Total reads (counting singles and paired-end as two singles)	Total reads from (B) decovoluted to 1 BAC	Total reads from (B) decovoluted to 2 BAC	Total reads from (B) decovoluted to 3 BAC	Percentage of reads in (B) deconvoluted to 1,2 or 3 BACs
1	8588298	4618740	1704951	31119	0.739938
2	5838315	3176056	1059789	27024	0.730154
3	5162088	2783832	1091407	20643	0.75471
4	4775432	2573249	899133	16641	0.730619
5	3720423	2015916	735850	12715	0.743056
6	4733035	2485150	953116	15036	0.729617
7	4268210	2182483	885177	14669	0.72216
8	3885961	2062660	790156	14345	0.737825
9	4394600	2303229	890312	20107	0.731272
10	4541704	2376145	875612	13714	0.718997
11	7845048	4256173	1504345	27391	0.737779
12	4899224	2666900	885415	13676	0.727869
13	9811586	5308334	1774456	37561	0.725708
14	4165083	2174529	761281	15552	0.708596
15	4946404	2729790	829670	21189	0.723889
16	3529661	1954580	672690	12155	0.747784
17	4271937	2243909	799702	12060	0.715289
18	6885704	3679922	1374095	31044	0.738495
19	7118903	3894842	1343694	32186	0.740384
20	4436059	2459187	834111	17075	0.746242
21	6065773	3240868	1201117	20316	0.735652
22	4867587	2595995	993017	16836	0.740788
23	7194596	3809285	1418781	20946	0.729577
24	5767493	2987241	1184813	23434	0.727437
25	4620823	2421791	904642	14676	0.723055
26	4474730	2392717	895355	15443	0.73826
27	2471316	1371325	389833	6699	0.71535
28	5071479	3000372	691739	14636	0.730901
29	2748836	1468919	568284	10362	0.744884
30	3969226	2127812	820158	13695	0.746157
31	3693530	1960455	779580	12979	0.745361
32	4487392	2377737	937224	21570	0.743535
33	3364217	1763420	709384	10780	0.738235
34	7045775	3798810	1397900	28454	0.741602
35	3602076	1811847	809417	16654	0.732333
36	2496637	1250550	463494	8185	0.68982
37	6327525	3311456	1374582	21903	0.744041
38	7830302	4123870	1534965	28213	0.726287
39	6345077	3480319	1245516	24101	0.748602
40	5615565	2909955	1172399	18704	0.730302
41	5621449	3060219	1059068	23946	0.73704
42	4053176	2167771	820509	18587	0.741855
43	3922502	2125106	733935	12470	0.732061
44	3087092	1701008	594431	9959	0.746786
45	3134389	1714637	576227	10158	0.734121
46	15984931	8370091	3117592	72236	0.723176
47	4805295	2545504	929557	15754	0.726452
48	2485715	1308089	441926	7418	0.707013
49	6507436	3292028	1350404	21340	0.716683
50	7345901	3959806	1362530	27406	0.728262
51	4629406	2449832	912700	16284	0.72986
52	4198962	2224778	868670	16887	0.740739
53	5766122	3169364	1066720	17539	0.737692
54	7924057	4231120	1522513	26591	0.729453
55	5994640	3285639	1171208	21135	0.746998
56	4423531	2350598	904612	15036	0.739284
57	7822133	4248113	1606788	31946	0.752588
58	6612156	3650828	1264701	28166	0.747668
59	4577224	2481592	909383	23800	0.746036
60	6746771	3570162	1406386	21803	0.740851
61	6124175	3346987	1217206	18612	0.748314
62	3649165	1964802	727655	12738	0.741319
63	4938768	2701795	976097	17149	0.748171
64	4969989	2678096	991209	17729	0.74186
65	7515170	4074231	1408199	34613	0.734121
66	4402825	2419594	823067	16946	0.740344
67	5646683	3106553	1039977	20917	0.738035
68	8998648	4818279	1829008	28858	0.741905
69	5252684	2961066	991297	18041	0.755881
70	8866848	4789052	1796645	52272	0.748628
71	9012184	4746066	1825083	32603	0.732758
72	6493807	3482990	1278868	21616	0.736621
73	6971198	3743897	1362481	30099	0.736814
74	4730424	2557473	940307	19125	0.743465
75	3228801	1776333	612050	11382	0.743237
76	11348381	5859912	2359428	36624	0.727501
77	9082378	5016074	1606893	29889	0.732502
78	6327119	3356441	1214577	20428	0.725677
79	4699815	2583605	778942	13512	0.718339
80	4677178	2636765	748293	14107	0.726756
81	6613038	3498461	1408761	20025	0.745081
82	7416277	3980199	1537847	31359	0.748274
83	4110789	2246650	807698	20353	0.747959
84	9517977	5252160	1647094	24774	0.727468
85	5091430	2723366	1058144	19223	0.746496
86	5588354	3052819	1153239	21161	0.756434
87	4151902	2224615	851199	19692	0.745563
88	4885873	2721688	937447	15205	0.752033
89	8655392	4691305	1688700	30247	0.740608
90	4634359	2453427	964748	17571	0.741364
91	4819461	2482839	1061676	20785	0.739772
AVERAGE	5647710	3.03301e+06	1.10353e+06	20885.8	0.736049

## Sheet: HV6 (k=26)
HV6 Pool	Total reads (counting singles and paired-end as two singles)	Total reads from (B) decovoluted to 1 BAC	Total reads from (B) decovoluted to 2 BAC	Total reads from (B) decovoluted to 3 BAC	Percentage of reads in (B) deconvoluted to 1,2 or 3 BACs
1	3186833	1675358	419696	8906	0.660204
2	6019873	3280877	841336	15239	0.687299
3	4621971	2498889	592965	10641	0.671249
4	2834896	1449635	350015	4755	0.636498
5	3512425	1868230	426423	5739	0.65493
6	3234889	1658743	447310	7960	0.653504
7	4543418	2340090	636303	8845	0.657047
8	4663532	2469401	684043	10499	0.678444
9	5502083	2632014	752788	11759	0.617323
10	4655904	2318027	588209	8871	0.62611
11	5193789	2559914	721148	9798	0.633614
12	3743409	1931664	535362	9026	0.661443
13	1523843	761467	179943	3415	0.620028
14	2786509	1409398	358983	8444	0.637653
15	2856030	1412044	354333	7713	0.621173
16	6263453	3313577	921590	11435	0.677997
17	3599616	1743091	382501	6338	0.592266
18	4076428	2215377	563700	7513	0.683586
19	4943161	2506595	625598	11515	0.635971
20	2521123	1179339	282175	5041	0.581707
21	2791735	1318471	318871	6875	0.588959
22	3081627	1546387	381570	6391	0.627703
23	2853723	1387917	363294	5033	0.615422
24	5212896	2490387	647886	10161	0.60397
25	2747688	1273930	364774	4584	0.598062
26	5953464	3090614	803808	14544	0.656587
27	3141280	1591790	393233	8756	0.634703
28	5112964	2650578	415119	14415	0.602412
29	4934701	2626659	508097	11326	0.637543
30	3456233	1332029	318377	6887	0.479508
31	3856134	1816375	498064	8022	0.602277
32	3464499	1624935	435086	5357	0.596155
33	3473025	1542975	461706	7538	0.579385
34	3499469	1681857	476627	8673	0.619282
35	2145084	1007176	292825	3587	0.60771
36	3002792	1369906	370653	4744	0.581227
37	2016317	700677	196129	2910	0.446218
38	5103966	2469565	646915	9671	0.612494
39	5894184	3114938	718647	9427	0.652001
40	3943979	2099824	493992	7798	0.659642
41	2934672	1311238	248933	5583	0.533536
42	3397197	1623143	438055	6970	0.608787
43	1963898	799939	182437	2529	0.501505
44	2965493	1245376	325556	5870	0.531717
45	2481648	941502	250322	5168	0.482338
46	1978603	677677	165372	2785	0.427491
47	4355487	2227556	613632	7898	0.654137
48	2524376	1011015	240566	2961	0.496971
49	2468641	865169	220554	2842	0.440957
50	1560216	467035	132642	2361	0.385868
51	1249592	438858	123850	2752	0.452516
52	2187713	933725	266009	3432	0.549965
53	1759440	723768	166032	3829	0.507905
54	1669948	679861	157209	4230	0.503788
55	3948632	2019753	533543	7763	0.648594
56	2376074	1004255	236920	3680	0.523913
57	2747910	1259837	307417	4341	0.571924
58	3704979	1628323	474164	7343	0.569458
59	2577356	1040004	272182	4357	0.510811
60	3847176	1054348	279007	5118	0.347911
61	4144473	1345434	365752	5034	0.414098
62	3506760	1507283	392488	4906	0.543144
63	5350318	1880849	541424	6778	0.454001
64	4418576	1827831	496809	6822	0.52765
65	2475132	1024303	210909	4070	0.500693
66	4264561	2156379	542283	11676	0.635549
67	3467320	1670692	405837	10701	0.601972
68	2895415	1388193	402025	5451	0.620177
69	3840292	1785526	393847	6785	0.569269
70	2371011	1014501	279843	3859	0.547531
71	4733423	2142934	619672	11284	0.586022
72	3404223	1395454	346551	4954	0.513174
73	2082767	924842	218220	3171	0.550341
74	2905398	1392318	359081	7536	0.605402
75	2497900	883823	215201	2636	0.441034
76	2842055	1289184	317579	3772	0.56668
77	4094282	2009751	492243	9752	0.613477
78	2357100	993551	283554	4414	0.543685
79	3133886	1482216	351469	6570	0.587212
80	3573152	1739787	387055	6905	0.597161
81	2118590	990743	257318	3898	0.59094
82	4299132	1488563	419669	7778	0.445674
83	3551751	1634853	403205	5795	0.575449
84	2794820	1215412	332149	6058	0.555892
85	2579143	919486	242445	3521	0.451876
86	3579667	1701437	414251	5371	0.59253
87	2174275	888499	241684	4527	0.52188
88	2803173	885919	229125	5069	0.399588
89	4127893	1676685	392835	7138	0.503079
90	2536896	751282	178759	2611	0.367635
91	2323502	1009777	271326	4221	0.553184
AVERAGE	3.40566e+06	1.57067e+06	400100	6648.64	0.568301
