# Supplementary material for: Combinatorial Pooling Enables Selective Sequencing of the Barley Gene Space
Source: PLoS Comput Biol. 2013 Apr 4;9(4):e1003010. doi: 10.1371/journal.pcbi.1003010 (PMC3617026; doi:10.1371/journal.pcbi.1003010)
Supplement: Dataset S4 — Excel file Dataset_S4 contains eight tables/sheets (two for rice, two tabs for barley HV3, two tabs for barley HV4, two for barley HV5, and two for barley HV6). The first sheet contains rice BAC data before and after deconvolution (columns A–H), assembly statistics (columns I–S), and Blast results (columns T–Y). Columns A–B are self-explanatory. Column C shows the list of pools where that BAC was assigned (called BAC signature). Column D shows the number of reads generated in silico for each rice BAC, column E is the actual size of the BAC, column F reports the number of reads deconvoluted to that BAC, column G the number of reads correctly deconvoluted, and column H the percentage of the reads correctly deconvoluted. A read is “correctly deconvoluted” if the list of BACs to which it has been assigned contains the BAC from where it was generated. Columns I–S report the results of running Velvet on the deconvoluted reads, BAC-by-BAC. For each BAC, ten choices of -mer were tested, in the range [25,79] with a step of 6. The spreadsheet reports only the assembly that maximized the N50. This is an arbitrary choice that does not guarantee the “best” overall assembly. Column titled “K” shows the value of the -mer in the range which maximized the N50. Column “Cnt” shows the number of contigs produced by Velvet. Column “Used” reports the fraction of the reads used by Velvet. “Med”, “Mean”, “n50”, “max” show the median, mean, n50 and max contig size, respectively. Column “Sum” is the sum of the size of all contigs/scaffolds. “n50/Sz” and “Sum/Sz” report the size of the n50 and the sum over the expected BAC size. “Ns” report the total size of gaps in the scaffolds. Finally, columns T–Y report the results of Blast-ing the assembly (contigs) to the actual BAC sequences. Column “HSPs” is the number of high scoring segment pairs, column “Covg” shows the percentage of BAC covered by the contigs of the assembly, column “Gaps” reports the number of gaps (i.e., regions of the BAC not [file pcbi.1003010.s004.xlsx]

## Sheet: Rice-Assembly (BAC-by-BAC)
Rice Deconvoluted BAC Assemblies - Velvet
Kmers: 25-79, step 6 Kmer chosen by largest n50 Insert size: 327 Expected covg: 57.43
BAC Data								Assembler Results											BLAST Results
BAC id	Address	BAC Signature	Reads Generated	BAC Size	Reads Deconv	Reads Correct	% Correct	K	Cnt	Used	Med	Mean	n50	n50/Sz	Max	Sum	Sum/Sz	Ns	HSPs	Covg	Gaps	AvgGap	Overlaps	AvgOvr
1	a0001A06	1,16,34,42,53,67,84	83082	150885	146055	145154	0.993831	55	20	85	685	7478	28009	18.563	53293	149562	99.123	4534	66	94.823	114	53.632	76	22.329
2	a0001A14	18,33,4,49,53,71,90	82844	129185	158922	158556	0.997697	61	18	76	262	6404	37356	28.917	48834	115277	89.234	2639	44	84.654	94	193.723	18	89.722
3	a0001B10	21,30,49,65,78,88,9	82714	139706	147898	146698	0.991886	55	15	86	248	9394	79534	56.93	79534	140915	100.865	962	30	97.946	28	38	118	15.305
4	a0001B12	21,3,31,46,53,78,82	83106	160400	40274	38137	0.946938	31	52	91	144	1183	22258	13.877	22454	61540	38.367	1207	74	36.27	245	414.984	50	11.04
5	a0001B21	23,39,42,58,7,74,90	82770	143728	129595	129299	0.997716	79	65	53	1198	2826	9982	6.945	23822	183718	127.823	1214	154	18.381	151	261.272	142	548.296
6	a0001C05	17,27,48,5,54,71,86	82934	153024	138709	137726	0.992913	37	33	94	272	4259	71393	46.655	71393	140575	91.865	1294	47	91.177	58	204.155	34	48.824
7	a0001C15	13,17,37,47,60,76,82	82674	146283	156193	155552	0.995896	61	21	76	841	6716	91801	62.756	91801	141049	96.422	2398	35	94.059	56	148.446	29	13
8	a0001D02	25,39,47,5,62,71,87	82914	147696	109383	106568	0.974265	43	63	85	272	1669	12847	8.698	32426	105175	71.21	2308	91	67.35	212	217.552	151	13.921
9	a0001D07	1,16,28,50,56,72,85	82980	155116	171021	167678	0.980453	43	36	92	1536	3485	7629	4.918	22733	125463	80.883	1984	55	78.547	122	265.172	13	71.231
10	a0001D11	23,37,47,5,53,68,79	83526	106135	107635	104468	0.970576	49	55	90	175	1864	57080	53.781	57080	102542	96.615	1981	39	84.762	100	135.4	177	14.876
11	a0001D19	23,39,41,55,6,68,80	83236	164838	167200	166629	0.996585	61	10	77	367	16183	95949	58.208	95949	161832	98.176	1753	26	96.65	30	184.067	0	0
12	a0001D21	22,28,4,48,56,78,88	82360	164648	172762	172578	0.998935	61	1	77	165041	165041	165041	100.239	165041	165041	100.239	792	7	99.736	7	62.143	0	0
13	a0001D23	1,24,33,41,61,67,85	82436	136977	101896	101706	0.998135	67	29	68	1290	3931	60284	44.01	60284	114026	83.245	1976	103	41.985	98	627.878	85	211
14	a0001F20	23,34,4,50,58,71,89	82788	156034	155887	155179	0.995458	55	31	83	541	4161	81464	52.209	81464	129002	82.676	3671	57	78.078	78	433.833	31	11.839
15	a0001H02	21,29,43,6,63,76,82	81446	141018	99698	99280	0.995807	73	53	58	731	2723	10748	7.622	44672	144333	102.351	886	126	23.153	104	510.308	88	628.364
16	a0001H06	11,19,37,52,64,73,79	83362	120455	91232	89738	0.983624	31	46	96	180	1972	26707	22.172	35324	90755	75.343	904	58	74.513	245	122.465	45	15.467
17	a0001H09	25,27,52,61,67,7,83	82648	146755	142834	141217	0.988679	61	13	77	649	11445	51593	35.156	56526	148787	101.385	3020	37	96.908	69	44.42	61	24.131
18	a0001H14	13,15,32,51,59,69,81	82564	141620	141843	141405	0.996912	73	37	61	1651	5588	15791	11.15	65811	206785	146.014	760	114	16.219	81	353.16	112	803.964
19	a0001H20	13,16,35,44,56,71,89	82896	182516	194832	194596	0.998789	55	31	84	1125	5551	56058	30.714	56630	172098	94.292	4215	68	91.866	111	129.225	21	23.905
20	a0001I05	10,15,35,44,55,68,83	82380	149762	139890	139129	0.99456	55	16	86	230	9421	95470	63.748	95470	150740	100.653	1286	30	93.854	50	149.24	79	22.063
21	a0001J13	10,20,29,50,57,76,81	83078	143106	95250	94948	0.996829	43	34	88	452	2190	38074	26.605	38074	74484	52.048	1847	50	50.695	140	497.821	27	31.963
22	a0001J23	23,32,46,6,65,76,79	82622	143444	116303	114932	0.988212	37	28	95	167	4358	81680	56.942	81680	122046	85.083	2096	33	82.491	59	422.237	14	14.571
23	a0001L16	11,17,28,44,65,78,83	82202	162958	146512	146039	0.996772	49	24	91	463	5752	103208	63.334	103208	138068	84.726	1193	35	82.499	56	488.25	39	30.205
24	a0001M03	2,24,32,52,58,76,80	82756	151139	120274	117152	0.974043	31	67	97	137	1997	24710	16.349	55438	133830	88.548	1984	82	83.096	255	89.004	213	13.394
25	a0001M14	17,2,27,45,58,66,82	83028	156438	207329	207212	0.999436	43	28	93	1624	5176	13952	8.919	48797	144944	92.653	2866	57	89.884	142	105.331	11	79
26	a0001M19	19,29,51,59,66,8,85	81882	168596	107887	98649	0.914373	61	66	72	207	2588	41681	24.722	53417	170829	101.324	6238	117	87.74	205	77.537	318	15.016
27	a0001N13	10,24,28,48,58,71,87	83096	147387	80337	76326	0.950073	37	48	93	162	2681	84501	57.333	84501	128734	87.344	1454	39	77.351	80	396.863	134	12.187
28	a0002A04	20,31,4,50,64,73,90	83212	160787	121549	120789	0.993747	49	37	87	222	2873	54042	33.611	54042	106305	66.115	1549	45	64.244	82	697.976	45	5.711
29	a0002A14	24,38,48,54,6,69,80	82322	170103	102821	97233	0.945653	43	60	90	207	2360	19793	11.636	30941	141639	83.267	2841	83	77.554	178	183	419	13.384
30	a0002A20	11,15,35,45,58,74,80	82644	157421	135544	134628	0.993242	43	34	91	355	3929	92668	58.866	92668	133593	84.864	912	52	83.266	156	161.654	56	20.089
31	a0002B06	23,34,52,6,64,70,83	82396	163769	134718	133331	0.989704	37	53	92	190	2534	102782	62.76	102782	134303	82.008	1349	64	73.483	187	223.519	45	36.178
32	a0002B19	19,35,42,53,68,7,87	83406	167257	51035	50967	0.998668	79	38	50	978	1537	1877	1.122	11178	58438	34.939	294	78	5.634	66	2026.23	57	422.86
33	a0002C23	16,27,5,51,62,73,84	82882	147374	167431	167099	0.998017	43	11	95	1624	12993	114103	77.424	114103	142926	96.982	1308	20	95.976	41	144.659	0	0
34	a0002D18	18,33,41,55,75,88,9	83500	145518	140451	138271	0.984479	37	44	92	224	3064	30247	20.786	47676	134858	92.674	2354	54	87.824	190	89.179	67	11.552
35	a0002E02	23,34,40,54,7,76,80	82398	140339	112469	107881	0.959207	49	77	87	181	1687	19187	13.672	26037	129918	92.574	4172	113	81.009	212	99.599	356	15.553
36	a0002E08	20,27,42,65,70,8,83	83398	138519	107345	105520	0.982999	61	38	76	219	3196	34123	24.634	37695	121469	87.691	3319	57	83.231	78	291.038	57	9.246
37	a0002E19	24,34,4,47,63,69,91	83204	127277	115641	113099	0.978018	79	39	52	1219	4115	16939	13.309	25977	160508	126.109	2465	141	34.914	97	293.196	150	362.66
38	a0002E21	24,27,42,56,69,7,81	82560	151154	124491	124176	0.99747	49	40	87	515	2548	16585	10.972	34926	101930	67.435	1650	61	67.151	90	550.656	6	15.667
39	a0002E22	1,14,39,50,60,69,90	82688	163374	152108	151072	0.993189	37	56	91	425	2280	12140	7.431	21770	127691	78.159	2017	92	77.167	244	148.25	25	45.24
40	a0002F02	20,29,48,64,77,8,87	82556	157034	157011	156788	0.99858	49	55	85	805	1885	4576	2.914	18416	103726	66.053	3687	80	63.379	206	277.602	5	64.2
41	a0002G02	24,3,35,49,53,73,83	82898	155281	152468	151837	0.995861	55	27	84	545	5359	22482	14.478	39061	144709	93.192	3856	73	89.368	134	106.627	43	51.674
42	a0002G05	24,27,4,52,60,77,90	82456	150372	113297	109932	0.970299	25	51	98	208	2703	20630	13.719	31711	137897	91.704	3948	95	85.247	364	54.929	109	20.101
43	a0002G13	18,2,27,42,63,77,84	83322	152287	106270	106158	0.998946	79	60	51	1562	2290	4357	2.861	16520	137410	90.231	1730	150	9.747	105	737.895	149	402.443
44	a0002H01	26,36,4,47,59,72,86	82704	151384	109386	104262	0.953157	37	47	95	156	3156	85780	56.664	85780	148367	98.007	3074	51	87.875	125	129.712	151	14.185
45	a0002H12	20,3,36,51,65,78,90	83626	140008	121764	120399	0.98879	61	25	74	295	4259	63856	45.609	63856	106479	76.052	2931	52	74.086	114	316.079	17	14.647
46	a0002H16	20,32,42,6,63,69,86	83290	157007	173394	172647	0.995692	37	25	95	327	5508	34808	22.17	61905	137718	87.715	214	30	87.011	201	99.144	25	18.6
47	a0002I03	18,2,31,41,61,78,79	82986	150938	187669	187536	0.999291	61	21	75	1835	6657	37700	24.977	41640	139812	92.629	4573	57	89.476	78	201.641	6	26.167
48	a0002K20	12,14,27,51,60,67,85	82932	153250	153405	153026	0.997529	61	19	76	2406	6825	20837	13.597	61221	129679	84.619	4202	54	81.597	77	361.675	6	59
49	a0002M14	1,19,29,44,64,76,80	83062	148856	155535	155333	0.998701	61	32	75	822	3905	29659	19.925	44190	124982	83.962	3934	62	81.223	82	340.854	0	0
50	a0002M17	13,23,37,42,64,77,81	83442	140344	182959	182879	0.999563	49	46	85	868	2301	7802	5.559	12037	105855	75.425	2136	65	73.55	145	254.255	10	25.4
51	a0002N07	11,17,37,45,54,77,88	81654	42243	56366	56031	0.994057	79	11	51	738	3389	7136	16.893	16895	37288	88.27	240	28	18.974	20	990.9	16	900.625
52	a0002O23	1,16,37,51,58,71,90	82698	153075	129683	129268	0.9968	55	29	84	636	4478	26893	17.569	47963	129889	84.853	3962	62	81.994	102	265.725	14	32.714
53	a0003A07	1,25,39,43,63,73,86	83262	184340	137993	134519	0.974825	55	58	84	203	2537	38289	20.771	62134	147192	79.848	3718	95	81.139	173	187.647	120	19.217
54	a0003A08	16,3,30,45,61,78,83	82956	163017	152263	151408	0.994385	31	51	97	299	2669	18161	11.141	26071	136152	83.52	680	68	82.029	232	121.431	65	17.292
55	a0003A09	15,31,44,54,74,9,91	83074	167162	148872	147970	0.993941	61	21	75	535	7705	97250	58.177	97250	161805	96.795	2723	46	94.656	62	138.79	27	12.148
56	a0003A23	16,34,48,58,7,77,79	82906	152587	125028	122484	0.979653	37	50	94	183	2637	21221	13.907	29608	131871	86.423	3392	70	81.706	162	162.951	109	13.917
57	a0003B08	18,31,4,43,54,77,86	82566	162921	123378	122993	0.99688	55	45	78	1053	2291	6076	3.729	22772	103098	63.281	6704	107	58.331	220	301.441	33	47.606
58	a0003D18	1,23,39,49,53,77,82	82750	134017	130481	130085	0.996965	43	26	90	276	3933	27296	20.368	29892	102268	76.31	1188	39	74.77	100	330.39	17	45.529
59	a0003D19	19,33,49,54,7,74,83	83368	178286	171894	170571	0.992303	61	34	75	1076	4933	115236	64.635	115236	167740	94.085	5325	62	86.357	69	346.174	60	7.3
60	a0003E15	18,39,43,56,6,78,83	83484	155501	115446	112794	0.977028	55	42	85	175	3866	102752	66.078	102752	162379	104.423	1976	30	97.477	27	102.556	96	12.031
61	a0003E22	23,38,4,49,56,72,84	82820	181097	81292	72137	0.887381	49	100	89	180	1791	22671	12.519	48769	179126	98.912	2383	93	85.964	147	138.728	414	12.138
62	a0003F19	11,21,31,41,64,74,84	82572	158307	129694	127772	0.985181	61	29	76	228	5266	95041	60.036	95041	152742	96.485	3841	56	91.069	89	140.506	126	12.96
63	a0003G14	17,37,42,58,72,8,84	82270	150164	146966	146343	0.995761	55	19	86	943	7818	29509	19.651	61799	148558	98.931	2579	41	95.558	49	101.857	106	15.849
64	a0003G23	17,34,46,53,68,8,91	83536	135918	154570	152932	0.989403	43	14	95	796	9578	86066	63.322	86066	134103	98.665	1004	26	95.339	61	96.475	21	21.429
65	a0003H05	24,32,43,57,6,74,81	83380	162455	141150	140583	0.995983	55	32	85	1171	4584	38408	23.642	41073	146690	90.296	7286	88	83.461	152	168.882	34	35.235
66	a0003H10	2,20,39,46,54,76,86	83028	144922	115702	112720	0.974227	43	54	89	234	2291	14787	10.203	30796	123748	85.389	3032	83	81.24	234	107.342	146	14.178
67	a0003H14	15,3,32,41,55,74,85	82406	144774	162067	161883	0.998865	49	11	92	409	11629	37102	25.628	60631	127929	88.365	885	33	92.778	43	215.163	37	32.541
68	a0003H18	20,35,52,58,66,7,89	82846	165830	126007	123013	0.976239	61	37	76	375	4379	123746	74.622	123746	162023	97.704	4560	61	89.684	56	288.589	103	9.184
69	a0003I19	1,14,34,48,56,71,80	83026	116389	91081	86152	0.945883	43	45	90	183	2438	38553	33.124	50630	109720	94.27	3847	64	81.759	111	173.838	145	13.338
70	a0003I23	17,27,3,46,61,72,79	83104	143312	92076	91853	0.997578	73	38	58	882	3402	16010	11.171	29645	129313	90.232	814	92	16.659	56	1192.95	76	692.539
71	a0003K15	11,26,27,40,65,76,86	83184	166150	129114	121737	0.942864	61	77	73	239	1818	18971	11.418	32308	140062	84.299	8387	146	72.338	242	172.24	267	16.022
72	a0003L04	13,20,31,46,65,75,89	83394	171397	171024	170008	0.994059	61	27	75	959	5825	47916	27.956	48820	157278	91.762	5900	67	88.234	110	181.782	2	85
73	a0003L06	18,38,41,53,7,74,91	82888	142557	135985	135578	0.997007	37	29	95	177	4447	105541	74.034	105541	128971	90.47	2768	57	84.128	175	113.354	42	66.429
74	a0003L14	18,39,4,41,63,66,89	83624	147109	137451	136793	0.995213	55	14	86	181	10629	85131	57.869	85131	148812	101.158	1729	23	98.354	20	99.3	63	6.921
75	a0003L20	17,29,4,40,63,72,80	83372	120643	156060	155957	0.99934	55	34	79	1040	2887	16377	13.575	36540	98163	81.367	2970	56	78.742	91	280.187	8	18.625
76	a0003P01	18,32,51,62,78,86,9	83922	177226	155515	154481	0.993351	61	17	77	288	10327	166142	93.746	166142	175563	99.062	2272	30	95.143	51	158.314	38	14.026
77	a0003P21	25,27,4,49,65,75,79	82462	152603	169483	169301	0.998926	55	13	85	6773	10865	37103	24.313	42777	141252	92.562	2411	44	92.306	55	190.909	28	44.357
78	a0004A05	18,35,46,64,76,8,82	82894	163886	157154	156804	0.997773	67	47	68	1718	3908	10242	6.249	27951	183676	112.075	3238	187	52.876	286	127.262	223	183.108
79	a0004B07	1,19,39,48,59,72,87	82494	157760	113462	105283	0.927914	25	76	98	135	2090	24484	15.52	56644	158856	100.695	2556	100	84.698	526	38.401	313	12.591
80	a0004C18	10,18,37,41,56,69,80	82784	175878	158817	157540	0.991959	25	21	99	502	8295	100133	56.933	100133	174204	99.048	2933	50	95.354	170	40.747	69	18.029
81	a0004D01	12,17,38,49,63,67,87	82362	175691	117326	116410	0.992193	49	72	84	494	1770	6273	3.57	35039	127445	72.539	8070	174	68.841	415	123.053	100	36.77
82	a0004E14	1,19,36,52,54,68,81	83042	162335	73934	71886	0.9723	43	58	72	251	1132	5752	3.543	14185	65689	40.465	1824	78	40.319	229	421.31	14	28.786
83	a0004F10	10,15,29,52,58,73,84	82602	153046	119937	117535	0.979973	31	36	98	151	4160	25043	16.363	32466	149792	97.874	2892	56	92.438	189	50.725	135	14.711
84	a0004F16	25,39,51,61,69,88,9	82930	149666	116689	110007	0.942737	49	94	88	181	1627	23354	15.604	29799	153027	102.246	3959	94	87.332	219	66.1	303	14.799
85	a0004F22	10,23,30,44,65,67,89	83166	154832	115250	111771	0.969813	61	24	76	198	6598	46686	30.153	73022	158360	102.279	2501	41	96.625	39	80.744	212	9.792
86	a0004F23	16,28,42,58,6,76,83	83004	183398	116716	107660	0.92241	43	85	91	173	2273	48960	26.696	49045	193212	105.351	5972	112	90.364	208	51.635	481	14.412
87	a0004H09	21,35,50,53,70,8,88	82406	157786	98947	97940	0.989823	37	58	87	383	1572	13912	8.817	18154	91180	57.787	3359	98	55.447	380	181.089	50	29.7
88	a0004H17	11,17,35,52,55,70,84	82986	156436	132524	131855	0.994952	55	19	85	471	7688	21527	13.761	66273	146072	93.375	5551	66	88.981	103	160.573	17	41.118
89	a0004I02	12,20,31,45,62,69,79	83338	153482	164223	163984	0.998545	37	16	96	472	9110	95207	62.031	95207	145766	94.973	971	26	93.8	74	124.757	3	94.667
90	a0004J04	21,27,40,60,74,82,9	82138	192436	133547	129300	0.968198	37	28	96	159	6963	129268	67.175	129268	194972	101.318	1112	23	96.602	76	74.197	108	8.333
91	a0004J05	16,32,43,62,76,8,85	82850	154639	138642	137615	0.992592	73	32	59	1176	6663	25766	16.662	30296	213220	137.882	919	99	47.165	49	248.367	73	952.521
92	a0004J11	22,39,46,56,69,8,85	82596	138765	82682	74380	0.899591	31	97	95	135	1240	31740	22.873	38281	120314	86.703	3928	101	70.481	245	145.931	391	13.322
93	a0004J20	11,20,36,46,63,74,79	83238	139113	116987	114543	0.979109	61	20	76	695	6921	87959	63.228	87959	138422	99.503	3083	52	95.132	68	70.676	71	27.69
94	a0004K07	22,34,45,55,77,85,9	82372	172771	113641	113034	0.994659	37	56	90	217	1919	16845	9.75	37688	107474	62.206	755	86	63.157	268	233.146	75	15.613
95	a0004K08	13,24,39,45,55,69,87	83076	142444	161005	160852	0.99905	61	39	75	1197	3312	12866	9.032	36575	129182	90.69	4995	71	86.32	89	218.944	0	0
96	a0004L12	17,39,4,44,58,68,87	81922	143114	123219	122281	0.992388	55	45	82	381	2576	16737	11.695	22037	115934	81.008	5774	97	77.341	148	213.568	19	43.158
97	a0004L24	14,38,40,59,69,7,83	82900	175117	175554	173479	0.98818	43	38	92	200	4138	103073	58.86	103073	157274	89.811	1760	44	85.18	131	190.153	97	10.753
98	a0004N06	18,28,48,5,65,66,90	82602	168617	103716	98384	0.94859	31	68	95	214	1857	10945	6.491	21891	126302	74.905	4286	127	67.994	513	96.965	171	24.708
99	a0004N07	10,22,31,50,53,66,89	82916	154516	106820	104935	0.982353	31	51	96	165	2603	32231	20.859	40426	132763	85.922	2153	59	82.765	149	173.725	78	9.564
100	a0004N11	25,31,49,5,53,69,84	82340	150338	170982	169991	0.994204	55	18	85	805	8265	32015	21.295	59397	148772	98.958	3969	42	94.914	53	141.736	2	67
101	a0004N12	1,25,34,41,59,75,89	83164	158173	145699	142322	0.976822	55	80	80	186	1668	31209	19.731	43264	133468	84.381	4753	88	73.138	151	260.755	290	10.741
102	a0004N23	23,27,3,41,65,73,91	83220	159046	136223	135099	0.991749	55	29	85	188	5350	108972	68.516	108972	155168	97.562	2920	43	92.114	50	212.98	102	18.559
103	a0004P05	22,29,4,51,62,75,90	83144	161352	144666	142704	0.986438	43	28	94	219	5166	100585	62.339	100585	144673	89.663	1887	40	84.677	354	59.537	74	49.297
104	a0004P10	13,19,27,50,62,76,79	83396	140308	123579	123391	0.998479	61	32	77	199	3485	36680	26.142	37600	111537	79.494	2675	68	77.775	70	429.457	27	41.519
105	a0004P19	1,25,27,46,56,70,88	82476	166699	145039	144036	0.993085	43	62	89	609	1998	13801	8.279	23760	123898	74.324	1689	89	71.068	294	151.432	104	35.654
106	a0005B06	18,2,33,47,60,72,83	82398	184331	143768	139996	0.973763	61	21	76	496	8946	129659	70.34	129659	187872	101.921	5684	39	91.809	106	138.981	21	17.476
107	a0005B10	14,39,45,58,78,79,9	83144	138503	169065	168712	0.997912	61	23	77	328	6184	41747	30.142	53727	142241	102.699	5319	50	93.932	73	105.918	8	84.125
108	a0005B14	13,26,38,49,59,68,89	83094	175941	81830	66856	0.817011	37	123	90	154	1337	43321	24.622	54314	164523	93.51	4949	165	75.284	568	62.641	630	12.548
109	a0005B20	1,14,33,45,63,74,91	83448	157877	116529	115066	0.987445	61	47	74	514	2590	21401	13.555	43296	121772	77.131	5873	112	73.399	187	214.144	101	19.327
110	a0005C12	22,35,45,6,65,69,83	83060	190734	142922	139138	0.973524	49	50	90	183	3694	32234	16.9	68468	184731	96.853	3273	69	90.849	96	155.625	181	13.89
111	a0005D04	10,16,38,50,65,70,91	82630	180499	189182	188980	0.998932	49	36	88	741	4092	25113	13.913	72518	147318	81.617	1522	51	79.6	97	364.268	147	10.116
112	a0005D06	16,2,29,41,65,75,84	83052	152395	162123	162034	0.999451	43	47	88	728	2425	13927	9.139	33965	114015	74.815	1807	60	73.417	159	254.119	1	106
113	a0005D13	1,18,35,52,56,73,90	82926	135483	118035	112084	0.949583	55	69	83	181	2043	14479	10.687	29569	141008	104.078	7133	117	85.786	182	69.852	452	14.48
114	a0005D14	19,39,4,51,55,77,91	83822	154175	152507	151778	0.99522	61	17	76	544	8724	120320	78.041	120320	148309	96.195	2764	50	89.009	60	247.95	44	47
115	a0005F08	16,35,40,57,73,88,9	82994	142789	155021	154968	0.999658	55	24	83	1352	4686	22510	15.765	36967	112473	78.769	3792	53	75.365	101	347.158	1	113
116	a0005F14	26,3,33,50,64,75,83	82876	167659	151396	149673	0.988619	55	47	84	441	3043	31222	18.622	48955	143047	85.32	5335	84	78.144	196	176.77	129	15.481
117	a0005F15	13,18,33,45,54,73,89	82802	160163	150206	149872	0.997776	55	41	83	683	3275	12488	7.797	47319	134287	83.844	5810	87	79.873	110	290.036	8	41.5
118	a0005G22	25,28,4,52,58,72,81	82614	157530	157231	157068	0.998963	73	61	60	1288	3391	10398	6.601	25629	206863	131.317	1471	144	20.077	114	347.079	133	649.135
119	a0005H04	2,21,32,48,56,69,87	83180	156538	105410	97222	0.922322	55	128	81	181	1249	27418	17.515	35439	159975	102.196	6576	143	77.883	188	135.755	861	10.568
120	a0005H08	22,31,46,54,6,68,88	84024	137827	125461	123747	0.986338	61	33	75	221	3632	69446	50.386	69446	119859	86.963	3304	57	82.153	63	369.46	125	10.576
121	a0005H09	1,19,28,41,58,66,91	82030	183840	151175	149768	0.990693	31	81	95	188	1912	34188	18.597	55684	154924	84.271	1084	68	80.408	310	114.374	49	11.469
122	a0005H12	26,37,5,51,55,75,85	83756	150780	142014	141715	0.997895	73	44	59	745	4810	20937	13.886	29657	211646	140.367	1320	113	21.147	86	347.733	129	689.837
123	a0005H24	18,35,44,58,6,77,88	82764	160350	159862	159377	0.996966	31	43	96	869	3159	18353	11.446	58813	135849	84.72	1404	57	83.182	217	119.677	38	26.263
124	a0005J11	18,29,41,54,68,8,83	83268	181246	118759	114247	0.962007	61	45	75	545	3812	28022	15.461	45148	171567	94.66	7267	111	87.196	154	133.974	124	20.766
125	a0005L01	18,3,35,41,62,72,84	82534	160025	111072	108818	0.979707	55	37	85	180	4026	131964	82.465	131964	148981	93.099	1516	41	87.122	33	543	189	14.228
126	a0005L07	1,19,31,50,63,70,84	83442	163606	141520	140459	0.992503	61	15	77	1868	10838	35192	21.51	39363	162583	99.375	3268	48	96.553	75	62.133	29	33.759
127	a0005L14	26,29,44,58,71,83,9	82608	139953	77487	77042	0.994257	61	30	74	737	2386	10809	7.723	13686	71608	51.166	5237	76	45.229	120	622.267	104	19.048
128	a0005M15	22,28,49,5,59,71,85	82992	155694	151866	151553	0.997939	61	43	76	778	3236	17362	11.151	32124	139177	89.391	5749	91	82.906	115	216.826	103	16.301
129	a0005M16	10,23,27,48,60,76,83	83480	154241	130194	129692	0.996144	43	30	90	508	3869	78595	50.956	78595	116096	75.269	1027	48	73.764	75	523.36	55	22.091
130	a0005N04	23,35,43,60,7,73,82	82524	183265	186539	185395	0.993867	55	23	85	492	7988	46487	25.366	76247	183740	100.259	4319	46	94.458	79	121.911	6	87.667
131	a0005N07	26,37,52,58,6,68,82	82694	155840	126540	125252	0.989821	61	25	77	268	5410	37769	24.236	41199	135259	86.794	4974	64	83.592	68	375.191	2	28.5
132	a0005N17	17,38,4,41,65,71,85	82588	156934	159524	159199	0.997963	73	20	60	2191	12297	140614	89.601	140614	245958	156.727	597	57	32.128	44	204.955	45	2166.6
133	a0005O11	16,32,40,5,53,71,81	83016	146255	147111	146809	0.997947	79	66	52	977	2655	8408	5.749	23154	175281	119.846	1519	158	17.538	105	448.829	137	536.336
134	a0005O15	11,25,27,43,60,78,84	83036	162408	145339	144123	0.991633	61	31	75	1063	4408	79086	48.696	79086	136672	84.153	6147	64	73.881	90	468.278	28	9.821
135	a0005O18	12,26,32,43,59,67,80	82836	153701	157131	151984	0.967244	55	40	84	252	3785	91107	59.275	91107	151434	98.525	3829	67	83.297	127	186.622	126	15.651
136	a0005P10	11,26,31,52,63,77,81	82816	163766	154631	153509	0.992744	79	52	50	1412	3973	16231	9.911	22243	206641	126.181	2105	143	23.902	107	392.271	162	510.179
137	a0005P12	10,14,28,52,60,78,80	83092	193424	170567	168942	0.990473	61	48	74	664	3595	24176	12.499	74662	172575	89.221	7368	105	83.069	153	209.477	33	21.152
138	a0006A05	14,29,52,57,7,70,91	82530	146785	135121	134078	0.992281	61	28	77	572	4495	25589	17.433	43306	125875	85.755	3295	60	83.694	88	270.182	2	79.5
139	a0006A15	12,16,35,43,53,78,79	82604	142385	140189	139888	0.997853	55	40	83	303	3365	112085	78.72	112085	134633	94.556	5220	56	81.319	96	268.146	65	13.185
140	a0006A22	18,30,4,40,61,67,84	82792	190692	172359	171316	0.993949	55	41	85	337	4304	28564	14.979	67435	176494	92.554	3028	66	91.69	84	185.655	26	9.692
141	a0006B13	11,20,38,52,62,68,83	82718	144690	124003	120817	0.974307	55	46	84	183	3101	36281	25.075	40893	142679	98.61	6572	93	85.813	189	88.228	304	12.671
142	a0006D01	13,18,28,43,63,75,79	82816	133631	110227	108887	0.987843	61	38	76	740	3088	14778	11.059	31393	117350	87.816	6173	80	81.278	83	297.072	15	24.067
143	a0006D11	26,35,45,5,56,68,81	82868	176638	145790	143864	0.986789	61	19	77	256	9459	144370	81.732	144370	179723	101.747	2145	31	95.061	30	228.333	204	9.186
144	a0006E05	12,19,37,40,54,66,89	82570	151126	148678	148435	0.998366	61	26	76	966	4756	32541	21.532	50693	123658	81.824	3771	57	78.698	77	413.857	11	29.636
145	a0006E07	20,38,46,5,57,71,88	83266	145191	159415	158595	0.994856	37	13	96	678	10706	55132	37.972	58747	139187	95.865	1924	28	94.249	59	138.136	11	18.182
146	a0006F11	10,22,37,42,63,74,88	83180	166236	136196	130540	0.958472	55	115	75	183	1162	12293	7.395	40584	133714	80.436	5307	125	61.682	162	360.981	447	11.676
147	a0006G04	18,37,52,63,70,8,86	82634	156937	175170	175044	0.999281	61	43	74	1409	3023	7542	4.806	18248	130010	82.842	5911	87	79.106	135	242.889	0	0
148	a0006G16	2,24,36,51,56,77,88	82742	172915	136193	134503	0.987591	61	20	76	623	8417	88993	51.466	88993	168355	97.363	2568	35	95.078	48	177.292	1	1
149	a0006G21	24,28,43,5,56,67,89	82920	133701	126381	123929	0.980598	61	21	75	261	5912	81643	61.064	81643	124160	92.864	1913	34	87.775	42	347.024	110	16.091
150	a0006I23	13,19,35,48,58,78,82	81980	160978	153341	152956	0.997489	73	26	60	1514	7097	24898	15.467	54730	184528	114.629	1698	75	51.483	60	482.283	59	833.288
151	a0006J08	22,35,4,43,59,70,89	82872	167729	164805	164632	0.99895	43	19	93	1101	7461	28935	17.251	62520	141765	84.52	1718	35	82.947	132	212.848	9	56.333
152	a0006K03	18,2,35,40,59,66,87	82510	180381	108911	105960	0.972904	43	50	88	207	2486	75693	41.963	75693	124349	68.937	1527	59	64.726	82	757.171	112	13.741
153	a0006N03	18,30,45,63,71,82,9	83300	180467	125303	122371	0.976601	37	61	95	177	2631	26871	14.89	57649	160515	88.944	2164	78	84.394	159	163.799	148	14.318
154	a0006N17	14,34,4,51,65,76,84	83024	177031	85330	75380	0.883394	25	67	98	152	2616	49022	27.691	60572	175292	99.018	2558	79	87.552	315	64.879	166	9.639
155	a0006N19	10,24,34,40,55,66,86	82270	146214	97085	95582	0.984519	67	73	63	463	1418	5304	3.628	19543	103535	70.811	2516	252	33.974	488	144.275	327	79.917
156	a0006N24	15,2,39,48,55,73,89	82924	164615	113773	105536	0.927601	61	63	74	288	2589	9915	6.023	35617	163148	99.109	14603	171	77.882	279	110.882	330	16.588
157	a0006O21	13,20,39,44,61,77,79	82208	174461	130186	129529	0.994953	55	37	85	282	4081	92968	53.289	92968	151031	86.57	4791	75	81.348	84	384.571	7	33.857
158	a0006P17	21,3,32,49,59,75,84	82638	139985	115570	111717	0.966661	55	50	85	182	2801	90198	64.434	90198	140096	100.079	4332	59	90.108	64	184.688	229	8.852
159	a0006P19	13,18,34,48,60,70,91	82020	164950	166795	166625	0.998981	55	32	82	1024	4329	25448	15.428	50578	138535	83.986	4078	66	81.428	97	315.608	1	20
160	a0007A06	19,28,45,5,57,77,79	82582	148030	96974	86585	0.892868	61	39	74	345	3707	25328	17.11	48135	144594	97.679	5287	127	83.667	319	55.878	248	25.617
161	a0007A11	2,26,32,46,55,72,84	82638	141160	161179	160890	0.998207	55	3	86	24105	47238	112989	80.043	112989	141716	100.394	2335	13	97.017	12	349.25	1	20
162	a0007C14	13,21,36,45,61,71,88	83088	135065	112051	111887	0.998536	49	32	86	665	2574	13420	9.936	17107	82390	61	2294	53	59.089	81	680.333	7	21.429
163	a0007D01	24,28,46,65,72,8,80	83152	157557	99461	98455	0.989885	55	71	81	266	1532	11296	7.169	22661	108787	69.046	7409	122	61.479	190	311.753	79	18.481
164	a0007D06	18,34,44,61,72,9,90	82718	167397	119834	113581	0.947819	37	51	95	158	3335	102332	61.131	102332	170088	101.608	2283	55	89.834	149	91.349	276	12.344
165	a0007D15	21,34,44,5,64,68,82	83542	164286	111257	106332	0.955733	43	43	90	176	3387	44980	27.379	60398	145680	88.675	2589	52	80.745	120	239.017	192	15.375
166	a0007E10	13,15,35,47,64,73,87	83368	154125	108837	105636	0.970589	43	51	90	179	2571	65746	42.658	65746	131153	85.095	1924	64	80.472	155	181.252	162	12.364
167	a0007F17	15,38,50,64,67,7,85	82896	164478	143190	139730	0.975836	61	34	76	227	5055	50526	30.719	60812	171892	104.508	7265	68	84.842	147	165.238	82	7.817
168	a0007G11	15,27,44,53,67,8,86	83248	176641	196279	195473	0.995894	61	17	76	588	10037	112652	63.775	112652	170632	96.598	4309	44	91.077	60	259.417	9	21.778
169	a0007H11	21,28,43,53,71,84,9	83260	155827	87803	81062	0.923226	31	128	94	148	1123	79834	51.232	79834	143855	92.317	5519	101	63.641	344	158.904	164	12.159
170	a0007J02	14,3,36,43,61,77,91	83304	150245	145015	143969	0.992787	55	14	85	174	10935	94397	62.829	94397	153099	101.9	1514	22	98.895	20	39.3	81	10.79
171	a0007J06	10,17,37,44,64,71,91	82528	148936	82297	69787	0.84799	31	140	96	138	1101	85963	57.718	85963	154164	103.51	4873	98	75.556	336	91.982	527	10.436
172	a0007K09	20,39,4,48,60,75,80	82710	143381	160319	160111	0.998703	37	28	95	354	4718	115269	80.393	115269	132121	92.147	733	42	90.921	134	92.425	42	15.071
173	a0007K17	13,18,39,50,64,68,88	82570	149657	127454	127389	0.99949	79	67	54	1487	2434	4532	3.028	13315	163091	108.977	2015	157	12.694	126	475.706	127	556.85
174	a0007L18	2,23,30,49,54,71,87	82776	183314	115318	115004	0.997277	61	32	75	958	3701	15109	8.242	30487	118440	64.61	7816	90	59.9	111	656.171	12	56.167
175	a0007P08	23,28,48,57,68,7,81	83076	141817	152242	152214	0.999816	73	62	60	1263	2892	6257	4.412	18512	179359	126.472	2579	156	14.524	112	388.679	149	521.396
176	a0007P23	11,14,28,40,63,71,90	82766	166693	96378	93460	0.969723	55	58	85	177	2881	49474	29.68	67149	167116	100.254	3975	52	91.267	68	195.706	100	12.5
177	a0008A04	21,39,4,45,65,73,82	83320	165353	117904	113431	0.962062	31	77	97	223	2054	41872	25.323	48994	158215	95.683	3356	86	87.588	371	48	222	12.234
178	a0008B20	26,30,4,42,62,77,87	83232	173658	121156	117536	0.970121	55	54	85	211	2985	44316	25.519	70723	161229	92.843	5407	93	85.853	118	191.746	191	10.168
179	a0008C07	11,14,32,52,61,72,85	82422	146014	115903	115406	0.995712	37	9	95	2333	12941	42865	29.357	46321	116471	79.767	1955	31	78.502	85	366.412	2	122.5
180	a0008C11	2,26,35,42,60,76,90	82880	157205	154157	153605	0.996419	61	36	74	644	3674	68446	43.539	68446	132270	84.139	2981	57	81.999	80	353.525	1	17
181	a0008D01	17,28,42,59,66,89,9	82910	149744	102192	88814	0.86909	55	110	82	179	1560	24131	16.115	43314	171706	114.666	6083	127	84.85	148	79.709	653	16.675
182	a0008D10	25,32,42,55,71,8,90	83278	170004	85103	79827	0.938005	61	48	74	292	3131	34956	20.562	56818	150316	88.419	5945	87	80.429	127	245.26	147	14.449
183	a0008D12	25,39,49,55,7,70,81	82408	167432	159211	158817	0.997525	61	5	77	27813	33544	32667	19.511	70084	167720	100.172	3198	32	98.282	30	93.967	4	14.5
184	a0008E08	12,24,27,47,58,73,79	83166	145125	136661	136087	0.9958	61	26	76	209	4897	96350	66.391	96350	127346	87.749	2993	50	85.297	72	288.431	39	14.641
185	a0008E15	11,18,28,41,57,76,85	83520	140580	111706	111142	0.994951	31	55	93	221	1737	22821	16.233	29547	95546	67.966	1228	82	66.851	271	166.838	105	13.219
186	a0008F02	2,23,34,48,65,72,82	82380	177115	158239	157993	0.998445	55	62	84	425	2302	74984	42.336	74984	142747	80.596	4671	112	77.962	161	225.075	68	41.118
187	a0008F10	12,22,27,40,61,77,88	82796	145374	140173	139582	0.995784	61	25	76	912	5467	24935	17.152	46599	136675	94.016	4949	70	88.91	90	170.1	14	58.071
188	a0008G22	11,26,30,49,57,67,79	83064	195162	164131	162934	0.992707	43	42	92	238	4087	43007	22.037	49592	171667	87.961	2091	55	85.86	139	188.424	63	22.302
189	a0008H20	13,17,38,50,53,73,84	83174	187891	162127	161857	0.998335	37	53	93	482	2669	28522	15.18	49347	141509	75.314	1388	65	74.017	254	190.346	20	23.6
190	a0008I04	16,39,52,55,74,83,9	83218	182099	121509	112565	0.926392	55	118	82	180	1544	32102	17.629	67941	182193	100.052	6996	129	73.926	300	135.983	625	10.698
191	a0008J04	19,38,49,5,65,73,86	82626	145570	146934	146919	0.999898	79	59	54	1748	2751	4383	3.011	14628	162319	111.506	823	128	13.973	97	564.866	131	537.687
192	a0008K21	15,27,3,52,64,76,88	83078	184036	152275	150866	0.990747	55	33	85	184	5514	61520	33.428	62785	181967	98.876	4384	60	93.262	73	155.151	106	10.132
193	a0008L10	25,29,43,5,54,75,80	83266	168503	13735	13735	1	31	15	87	524	727	1483	0.88	2001	10917	6.479	227	16	6.175	80	1976.22	0	0
194	a0008M11	25,28,44,60,76,79,9	82444	135347	102446	100230	0.978369	43	42	87	544	2004	9546	7.053	15275	84183	62.198	2562	59	59.22	147	369.864	50	16.5
195	a0008N11	17,35,49,59,78,8,80	83268	145372	148776	147514	0.991517	73	32	60	2482	7001	30842	21.216	50195	224039	154.114	1082	114	27.355	102	146.118	159	570.453
196	a0008O15	25,28,43,57,70,8,82	82756	177800	156080	155767	0.997995	61	39	76	490	4031	36226	20.375	49355	157246	88.44	5379	103	84.951	187	126.797	112	27.205
197	a0008P05	26,36,52,61,76,84,9	82512	111706	86879	76681	0.882618	43	74	89	167	1617	71449	63.962	71449	119680	107.138	1195	70	89.42	158	37.5	510	11.557
198	a0009B14	17,32,4,49,55,76,86	82662	164083	102418	98584	0.962565	61	60	69	413	1943	8768	5.344	22443	116602	71.063	9899	133	63.244	206	288.262	47	19.745
199	a0009B24	15,27,43,63,7,74,89	83674	175711	119519	114939	0.96168	43	40	94	173	4223	115806	65.907	115806	168922	96.136	1139	46	89.056	141	114.716	213	14.343
200	a0009C08	10,14,29,42,53,75,82	82852	136864	111782	109973	0.983817	55	32	85	178	3715	79696	58.23	79696	118886	86.864	407	44	88.446	43	321.535	110	18.064
201	a0009C22	17,3,35,44,57,74,82	82404	140238	169290	169240	0.999705	67	35	68	1765	4907	40314	28.747	49605	171764	122.48	3078	126	61.872	113	235.08	97	277.381
202	a0009D03	24,36,43,58,68,7,86	82610	138236	128778	128552	0.998245	61	37	74	351	2841	24951	18.05	45833	105145	76.062	3024	69	74.016	90	394.511	3	137.667
203	a0009D05	13,15,27,49,55,71,84	83700	166741	150898	150279	0.995898	61	26	76	621	5998	78008	46.784	78008	155959	93.534	3707	57	90.862	126	116.635	36	15.028
204	a0009D10	14,2,31,40,54,73,84	82710	136126	69728	64009	0.917981	43	60	70	227	1162	11616	8.533	24792	69732	51.226	1033	78	49.5	198	336.222	126	17.23
205	a0009D16	14,31,45,56,7,77,82	83366	152456	111179	109312	0.983207	43	39	90	185	2849	63922	41.928	63922	111126	72.891	1249	57	71.619	203	207.522	82	13.915
206	a0009E03	2,24,27,50,54,78,83	82982	163758	155195	154886	0.998009	25	55	97	642	2520	21605	13.193	56442	138610	84.643	1995	70	82.293	321	89.271	10	34.1
207	a0009E21	21,3,39,44,62,67,85	82636	153217	142792	142253	0.996225	43	22	93	693	6439	74042	48.325	74042	141677	92.468	2756	50	90.451	70	202	10	49.1
208	a0009F16	20,36,41,6,61,70,81	82592	191893	148333	139015	0.937182	55	32	85	177	6063	57035	29.722	84562	194034	101.116	4845	54	93.347	79	131.797	88	26.75
209	a0009G17	17,35,4,45,60,67,79	82782	177437	147123	143787	0.977325	61	32	76	527	5500	48236	27.185	50138	176029	99.206	5866	84	92.626	93	122.774	104	16.029
210	a0009I02	14,31,46,59,70,79,8	82958	160363	151829	148948	0.981025	61	31	75	513	4702	16436	10.249	44560	145779	90.906	5461	73	85.51	96	234.677	82	8.634
211	a0009J03	18,2,34,50,53,69,85	82108	162927	160186	159069	0.993027	43	29	94	466	5290	33217	20.388	45858	153411	94.159	2480	73	89.563	211	62.479	126	30.333
212	a0009J04	10,17,27,40,56,75,84	82868	153033	115062	114759	0.997367	61	47	73	766	2033	6100	3.986	20971	95559	62.443	5141	94	59.372	140	443.764	3	16
213	a0009J11	19,35,44,59,67,81,9	83492	156867	98962	93013	0.939886	61	32	74	335	5082	48529	30.936	57687	162645	103.683	6485	89	93.699	91	76.527	148	19.73
214	a0009J18	17,38,45,64,69,8,86	83072	152470	125185	119358	0.953453	55	52	84	179	3010	91480	59.999	91480	156559	102.682	3508	53	93.951	50	145.84	194	9.954
215	a0009J19	15,34,51,53,66,7,90	82684	156995	110821	105153	0.948854	61	54	75	314	2641	39073	24.888	44864	142637	90.854	6108	102	80.016	189	139.063	332	15.334
216	a0009K02	15,31,43,64,68,8,81	82818	165161	130999	127827	0.975786	49	64	91	180	2444	32925	19.935	53459	156425	94.711	1924	66	88.876	83	193.157	214	10.939
217	a0009K05	20,33,46,59,7,72,85	82752	159495	129321	127391	0.985076	49	37	90	232	3602	23324	14.624	27929	133291	83.571	1802	52	78.853	86	371.791	140	12.536
218	a0009K14	15,3,38,46,65,69,84	82502	172742	90267	85768	0.950159	31	80	97	141	1829	25024	14.486	26568	146363	84.729	2240	72	78.617	291	121.636	125	12.336
219	a0009L08	2,24,31,49,65,66,91	82340	134657	100351	98490	0.981455	31	47	96	135	2574	78618	58.384	78618	120999	89.857	738	28	85.32	94	203.691	57	10.877
220	a0009L10	17,32,52,64,68,7,90	82562	152941	163662	163214	0.997263	55	20	84	1165	7145	32207	21.058	48985	142912	93.443	4135	55	92.134	85	140.929	12	4.333
221	a0009L21	23,28,46,5,64,69,87	81928	147165	148419	148037	0.997426	61	14	77	220	9953	58373	39.665	61207	139342	94.684	2306	33	93.256	41	242.073	0	0
222	a0009L24	11,15,37,51,57,68,84	82360	144495	100934	98060	0.971526	49	43	91	179	3446	127653	88.344	127653	148193	102.559	2341	23	85.373	57	351.018	102	11.049
223	a0009M23	2,26,37,48,59,70,81	81994	166439	155298	154514	0.994952	61	6	77	21095	27707	59824	35.943	63857	166242	99.882	1756	26	97.769	55	53.345	23	33.87
224	a0009N14	10,22,33,43,65,73,80	83502	153776	135889	135681	0.998469	61	49	75	384	2269	13198	8.583	17531	111215	72.323	4601	92	69.184	117	401.026	14	33.357
225	a0009N22	20,33,4,43,63,67,81	82642	155713	127575	124403	0.975136	43	45	89	186	3019	33863	21.747	43543	135878	87.262	1868	65	82.23	127	193.291	216	14.454
226	a0009O06	26,36,50,55,7,77,90	82304	183794	152903	151928	0.993623	25	29	99	618	6061	101810	55.394	101810	175780	95.64	2382	54	93.534	241	45.581	50	18
227	a0009O10	13,16,33,51,57,77,85	82766	150447	157451	157254	0.998749	43	13	93	850	10309	36024	23.945	42534	134025	89.085	774	28	88.53	85	196	20	29.85
228	a0009P07	15,28,45,53,6,78,81	82616	160000	142556	140774	0.9875	55	50	81	233	2882	101061	63.163	101061	144138	90.086	3986	63	80.287	112	273.5	100	9.08
229	a0009P12	21,34,4,43,61,75,85	83034	179624	111912	109204	0.975802	55	57	85	183	2840	96443	53.692	96443	161930	90.149	4061	64	82.699	65	455.8	138	10.5
230	a0009P17	12,26,27,41,55,69,83	83224	183093	140986	139947	0.99263	31	32	98	134	5471	50838	27.766	78925	175100	95.634	1836	47	93.144	91	127.945	39	23.308
231	a0010A07	19,33,48,6,64,68,86	82766	148575	114040	111853	0.980823	61	33	73	562	3776	86924	58.505	86924	124615	83.873	4100	68	75.455	92	353.239	143	27.755
232	a0010B21	19,30,41,65,76,8,87	83298	155599	80580	80471	0.998647	61	36	70	656	1517	4412	2.835	10193	54613	35.099	3612	70	32.563	110	951.945	10	21.8
233	a0010B23	23,31,4,41,53,67,83	82188	150784	100783	95021	0.942828	25	39	99	173	3805	107331	71.182	107331	148425	98.436	1421	39	88.562	177	92.588	69	12.449
234	a0010C24	13,16,29,52,59,76,90	83568	158294	165655	165447	0.998744	55	38	81	961	3468	25537	16.133	51760	131807	83.267	4879	82	76.88	228	151.443	142	14.57
235	a0010D24	13,17,35,41,61,69,91	81902	157189	166547	166132	0.997508	61	25	77	212	5999	78920	50.207	78920	149980	95.414	2682	45	93.633	51	193.176	6	26.167
236	a0010E05	23,33,50,61,66,7,91	82372	154151	115236	110789	0.96141	43	59	91	179	2401	75090	48.712	75090	141706	91.927	3352	98	82.594	161	135.559	246	20.354
237	a0010E10	15,33,50,53,68,82,9	82486	145480	144980	143448	0.989433	55	32	85	187	4427	117741	80.933	117741	141688	97.393	1910	40	93.858	55	152.273	77	7.273
238	a0010F09	21,36,41,62,73,87,9	83638	149296	157200	156806	0.997494	73	37	61	1834	6245	26976	18.069	54581	231072	154.774	1759	115	25.547	64	249.203	113	842.54
239	a0010H09	2,20,36,50,62,72,80	83256	138225	115094	114558	0.995343	49	27	89	396	3550	23838	17.246	26359	95862	69.352	1386	41	68.011	45	975.178	3	111.333
240	a0010H20	26,28,3,48,60,77,86	83224	183703	128528	127870	0.99488	43	65	89	585	1838	10821	5.89	22689	119475	65.037	3761	123	61.013	495	137.471	172	20.773
241	a0010I03	15,28,46,56,7,71,91	83170	153910	126097	124238	0.985257	43	37	92	180	3793	88134	57.263	88134	140356	91.194	1302	46	88.537	117	140.65	68	17.441
242	a0010J05	19,34,5,50,54,72,91	82740	157860	158196	157724	0.997016	31	39	98	464	3868	95087	60.235	95087	150865	95.569	2160	61	93.15	202	46.762	35	39.086
243	a0010K06	10,14,27,49,54,68,91	83002	163032	120691	114952	0.952449	43	72	93	172	2315	55667	34.145	67711	166717	102.26	2361	80	92.376	122	58.713	366	14.388
244	a0010K23	22,38,43,63,72,8,83	82806	178081	119124	117964	0.990262	37	49	88	239	2542	22915	12.868	50179	124569	69.951	3452	87	66.421	163	359.135	21	59.905
245	a0010M06	25,30,50,59,70,83,9	82546	145608	104116	101158	0.971589	31	39	98	140	3871	102623	70.479	102623	151001	103.704	823	27	98.149	53	25.057	138	9.906
246	a0010N03	20,3,33,42,60,74,84	83194	140973	91950	85868	0.933855	31	72	98	134	2079	118202	83.847	118202	149749	106.225	1591	48	92.345	193	42.902	210	11.957
247	a0010N05	11,20,30,41,53,66,80	82870	168954	157588	157298	0.99816	61	54	75	332	2696	33908	20.069	55705	145605	86.18	4477	104	83.46	130	205.969	37	31.595
248	a0010N17	11,19,38,42,57,70,81	83804	152950	116246	110105	0.947172	37	99	89	173	1406	10314	6.743	29059	139270	91.056	5259	153	75.714	463	65.886	349	19.026
249	a0010O17	26,27,49,53,7,78,85	82518	170652	124932	120911	0.967814	61	53	73	534	2876	11952	7.004	27060	152430	89.322	9857	125	78.968	225	148.098	139	18.489
250	a0010P05	13,20,33,52,64,69,80	82922	158694	104648	104641	0.999933	49	30	86	864	2299	6542	4.122	29412	68998	43.479	1057	44	41.79	128	710.141	14	105.571
251	a0011B01	17,28,5,51,60,68,88	82716	149133	122464	118764	0.969787	61	16	76	305	9440	43996	29.501	65666	151046	101.283	2361	31	95.131	53	125.604	22	27.5
252	a0011B06	10,24,39,42,59,77,83	82982	156763	114016	107152	0.939798	49	53	91	175	3103	39931	25.472	70672	164466	104.914	2598	51	88.719	147	92.054	219	18.963
253	a0011B08	16,31,40,56,66,8,83	82998	177882	162624	160128	0.984652	49	47	90	201	3607	58749	33.027	81672	169553	95.318	2396	52	90.009	79	211.481	76	14.026
254	a0011B11	1,24,28,52,57,69,88	82986	147154	127222	122510	0.962962	55	54	85	178	2910	59351	40.333	60015	157164	106.802	2175	56	95.287	86	36.663	285	13.27
255	a0011C08	12,18,27,52,54,72,80	82168	155243	116348	116085	0.99774	61	54	75	437	2020	11977	7.715	27802	109095	70.274	5983	100	66.452	132	393.947	2	40
256	a0011C12	20,28,3,40,56,76,87	82776	165990	116924	112580	0.962848	43	52	91	180	2844	31422	18.93	63362	147936	89.123	2967	73	83.509	142	177.43	123	17.707
257	a0011E03	20,31,41,63,71,8,91	82410	139849	99560	95373	0.957945	55	41	85	178	3484	128497	91.883	128497	142872	102.162	2986	55	91.291	63	161.095	128	15.859
258	a0011E14	10,20,28,47,64,66,79	82722	167821	113505	111845	0.985375	61	44	69	396	2126	57600	34.322	57600	93552	55.745	3832	144	81.051	263	111.57	99	24.818
259	a0011E17	15,28,44,5,63,72,84	82276	145470	157306	157223	0.999472	49	56	82	642	1852	5765	3.963	20508	103740	71.314	3605	79	68.513	154	296.649	5	24
260	a0011E24	23,29,52,53,71,8,80	82890	134012	109198	104849	0.960173	55	79	84	181	1746	19724	14.718	29120	137958	102.945	3967	79	89.402	76	141.684	299	11.485
261	a0011G01	26,31,49,54,72,8,90	82832	189019	122718	119698	0.975391	31	56	96	195	2625	21535	11.393	35344	147037	77.79	2102	67	73.616	325	150.818	72	11.861
262	a0011G13	10,14,31,48,65,69,86	83190	126035	164750	164677	0.999557	43	21	94	2741	5307	16176	12.835	30326	111465	88.44	1076	29	87.476	84	187.857	1	5
263	a0011G15	11,20,31,44,59,76,82	83562	151037	110158	101806	0.924182	61	65	72	205	2283	21095	13.967	64277	148411	98.261	8577	141	83.208	200	101.225	350	14.62
264	a0011G16	13,18,38,47,58,71,86	82448	175325	151293	150562	0.995168	37	45	93	304	3085	32234	18.385	39623	138851	79.196	5420	84	73.321	279	161.48	38	45.316
265	a0011H17	21,30,48,62,72,8,91	82780	178110	128875	126824	0.984085	31	36	99	135	5038	83807	47.054	89466	181389	101.841	1832	33	97.398	77	44.468	87	13.908
266	a0011I02	10,24,29,51,64,68,89	82442	187739	126786	120028	0.946698	25	73	98	128	2553	32029	17.06	38980	186414	99.294	3301	83	91.437	257	53.218	253	9.486
267	a0011I16	12,18,32,41,58,70,90	82362	183165	121417	120215	0.9901	55	39	85	241	4252	43335	23.659	76566	165860	90.552	2309	60	87.8	79	265.747	97	13.948
268	a0011J06	14,36,4,44,64,70,88	82562	146867	156212	155908	0.998054	31	44	96	529	2948	16437	11.192	55310	129746	88.343	2949	61	84.89	206	106.35	11	25.818
269	a0011J08	1,18,32,43,64,69,84	82528	157742	137815	137631	0.998665	61	29	74	982	3453	12123	7.685	41311	100145	63.487	4575	61	60.094	83	751.819	14	39.143
270	a0011L02	11,21,28,45,59,70,91	82712	158743	117377	117104	0.997674	49	23	90	549	5227	44392	27.965	51177	120229	75.738	2251	54	75.382	118	310.559	171	14.234
271	a0011L03	10,26,27,52,62,70,89	82764	139441	157415	157160	0.99838	55	22	85	441	6024	96320	69.076	96320	132540	95.051	3461	45	90.714	54	227.944	32	19.969
272	a0011L16	14,33,4,48,59,66,82	83120	161140	133748	131295	0.98166	55	38	85	185	4270	52543	32.607	59159	162264	100.698	2338	49	94.078	45	162.956	155	14.258
273	a0011N03	1,26,36,44,63,67,82	82582	162587	92993	88115	0.947544	37	64	94	151	2325	33830	20.807	47174	148856	91.555	2684	73	83.858	183	126.88	245	12.351
274	a0011N12	11,22,35,50,54,73,81	82220	158592	124422	120493	0.968422	55	43	85	191	3664	90391	56.996	90391	157584	99.364	2874	47	92.657	74	139.405	104	12.788
275	a0011O22	1,21,33,50,59,73,79	82640	165376	135340	127377	0.941163	55	68	84	181	2540	46687	28.231	74674	172741	104.453	4615	69	82.19	87	288.437	308	14.156
276	a0011P18	17,30,46,65,7,74,86	83358	166070	133108	127794	0.960078	31	71	98	137	2353	103648	62.412	103648	167128	100.637	2103	62	83.666	276	89.29	199	12.472
277	a0012A09	21,3,36,48,57,76,79	83362	154531	147834	147113	0.995123	25	20	99	249	7574	122023	78.963	122023	151480	98.026	1387	43	94.415	162	43.728	86	17.977
278	a0012A14	26,27,3,45,54,67,84	82750	144809	104183	100693	0.966501	37	38	96	154	3662	99576	68.764	99576	139163	96.101	953	38	91.408	88	118.977	100	19.72
279	a0012C20	25,33,45,61,68,79,8	83512	147939	147502	146980	0.996461	55	18	85	201	8038	98567	66.627	98567	144685	97.8	1947	33	95.151	31	205.935	58	13.621
280	a0012D04	10,18,39,47,55,76,84	82558	161186	118511	115736	0.976584	43	60	88	264	2040	11741	7.284	21510	122403	75.939	3388	105	70.495	307	139.762	265	17.551
281	a0012E01	25,32,5,52,59,66,86	83008	167960	166283	165757	0.996837	61	28	76	954	5369	20241	12.051	39490	150350	89.515	4259	70	87.966	132	140.833	88	18.443
282	a0012E09	2,21,39,43,59,74,88	82918	143489	128701	128369	0.99742	73	39	59	1394	4042	16144	11.251	41223	157665	109.88	1603	113	25.792	77	616.117	123	479.992
283	a0012E23	19,32,44,5,55,78,87	82510	149043	82067	82029	0.999537	79	41	52	1275	2464	8222	5.517	12802	101051	67.8	1339	90	8.63	74	1255.46	76	569.421
284	a0012F03	19,32,46,61,7,77,81	82842	146407	150033	149426	0.995954	61	12	76	589	11300	74953	51.195	74953	135602	92.62	2183	31	90.677	35	376.714	15	31
285	a0012F10	11,16,30,40,59,74,85	82588	171179	156478	153766	0.982668	49	42	89	261	3709	47693	27.861	53977	155791	91.011	2615	53	85.494	112	212.214	113	9.407
286	a0012F18	20,3,30,46,55,70,91	82684	157481	102359	98864	0.965855	61	10	75	203	16214	158905	100.904	158905	162145	102.962	2760	16	92.514	47	239.957	53	9.642
287	a0012G01	11,24,35,44,64,69,85	82430	192852	161348	160978	0.997707	61	43	74	813	3534	54675	28.351	56829	151997	78.815	6309	94	75.575	135	347.274	12	18.5
288	a0012G07	25,36,4,50,54,74,84	82998	165620	120101	107210	0.892665	31	101	93	266	1308	29322	17.704	36931	132181	79.81	4647	164	71.039	586	76.065	205	16.541
289	a0012G17	20,34,51,58,68,81,9	82954	132626	121091	119790	0.989256	49	41	86	718	2747	22855	17.233	35108	112634	84.926	3229	75	82.025	136	164.441	54	27.333
290	a0012G20	21,33,45,57,69,81,9	83020	153236	108530	108495	0.999678	43	27	89	1100	2936	6761	4.412	26427	79291	51.744	1885	39	50.341	120	634.125	0	0
291	a0012H15	12,22,30,49,53,68,81	82704	146080	137897	135245	0.980768	37	47	94	194	2895	42876	29.351	46468	136086	93.159	1612	59	87.608	161	96.888	151	16.576
292	a0012I12	25,37,4,40,60,71,86	83064	183552	164873	164406	0.997168	37	49	92	710	3243	36519	19.896	43834	158945	86.594	3484	85	83.689	239	119.661	60	22.333
293	a0012I14	10,26,39,49,56,73,87	83020	158445	154407	154251	0.99899	55	48	82	829	2691	12254	7.734	44792	129214	81.551	5016	87	78.022	121	286.066	4	52.25
294	a0012I24	21,30,45,5,53,67,87	82002	178250	137005	133964	0.977804	43	50	90	452	2874	38864	21.803	47763	143725	80.631	1383	61	79.232	141	254.638	95	11.737
295	a0012J06	13,25,33,50,63,72,90	83492	124597	151048	150856	0.998729	73	14	61	6682	14880	52410	42.064	53303	208323	167.197	846	49	24.439	36	162.5	39	2264.03
296	a0012J16	22,3,34,52,63,67,90	83004	171811	109401	106835	0.976545	37	34	96	156	5060	163353	95.077	163353	172071	100.151	1553	32	96.124	80	66.3	54	25.111
297	a0012K10	22,30,45,54,70,8,80	83142	161082	154603	154306	0.998079	55	28	85	411	4997	21601	13.41	37904	139933	86.871	2546	55	86.452	71	289.028	44	29.591
298	a0012L02	22,34,42,59,6,72,81	82644	147054	142691	141894	0.994415	55	18	85	238	7758	75123	51.085	75123	139645	94.962	2648	38	91.667	44	262.182	52	13.808
299	a0012L04	11,26,33,45,62,71,85	83102	167133	141620	140843	0.994513	49	26	91	276	6079	49984	29.907	51730	158063	94.573	2777	48	92.912	103	104.117	63	17.825
300	a0012L22	13,17,28,46,58,77,90	82324	151740	137413	136383	0.992504	49	36	90	237	3964	50713	33.421	52790	142724	94.058	3391	60	89.922	87	162.333	68	17.191
301	a0012M02	23,34,5,51,61,77,86	83642	133069	155679	155581	0.99937	79	58	52	1344	3077	12003	9.02	18592	178471	134.119	1977	154	28.315	152	171.803	183	378.563
302	a0012N01	1,14,38,47,54,72,88	82750	157998	115337	109883	0.952712	25	59	98	145	2565	82685	52.333	82685	151380	95.811	4098	81	79.767	268	113.47	95	16.4
303	a0012N13	26,3,32,47,58,78,81	83292	172146	35155	34857	0.991523	79	42	42	792	1134	1904	1.106	5198	47662	27.687	1745	117	7.293	119	1191.18	114	156.5
304	a0012N19	22,27,47,56,6,67,80	83266	195378	116427	113191	0.972206	31	44	99	133	4515	124134	63.535	124134	198691	101.696	1392	29	94.131	104	102.077	147	5.789
305	a0012O16	11,24,29,52,54,74,86	82986	148621	148823	148697	0.999153	31	25	97	997	5208	44294	29.803	47387	130219	87.618	547	34	87.049	171	112.211	3	20
306	a0012O17	19,3,33,45,55,76,82	83004	166416	117624	114602	0.974308	31	52	98	125	3263	65186	39.171	65735	169699	101.973	1364	43	95.494	189	32.302	100	13.94
307	a0012O18	11,22,33,44,55,66,90	82450	142245	148205	147979	0.998475	61	10	77	210	13418	81164	57.059	81164	134187	94.335	2410	28	92.345	30	362.967	0	0
308	a0012P10	14,37,48,5,60,73,87	83060	97258	94654	94517	0.998553	61	33	68	525	1715	12164	12.507	16464	56600	58.196	2915	54	54.949	81	538.667	6	30.667
309	a0013B07	10,17,35,51,65,77,87	82842	179320	129606	126306	0.974538	61	27	76	203	6561	92561	51.618	92561	177158	98.794	2679	38	89.488	176	99.398	102	13.304
310	a0013B13	13,22,36,42,53,69,90	82994	149654	144735	143888	0.994148	61	20	75	343	6822	96301	64.349	96301	136458	91.182	2708	41	87.189	49	382.122	44	10.182
311	a0013B17	10,26,36,40,64,69,81	83064	143351	125142	124587	0.995565	31	40	96	308	2915	12542	8.749	30364	116604	81.342	2874	74	76.315	199	157.377	85	30.988
312	a0013C06	22,35,47,58,68,8,90	82572	137609	146127	145827	0.997947	55	6	86	6387	22934	95708	69.551	95708	137607	99.999	1399	21	96.766	316	6.693	3	778.333
313	a0013C19	24,30,51,61,7,73,87	82600	169142	173771	173738	0.99981	73	70	60	1507	3415	8273	4.891	42520	239055	141.334	2226	175	19.372	144	240.951	156	651.788
314	a0013D01	16,35,4,48,55,69,90	82750	163168	102261	96552	0.944172	43	33	93	178	4913	146291	89.657	146291	162150	99.376	2477	41	92.261	67	169.657	91	13.857
315	a0013D18	18,28,4,47,62,73,80	82782	158829	150862	150686	0.998833	37	51	92	675	2313	9606	6.048	23004	117976	74.279	1568	60	72.729	203	212.079	12	21.917
316	a0013E05	10,21,36,42,65,66,84	82568	161479	127912	125644	0.982269	61	16	76	200	10244	47805	29.604	65757	163914	101.508	2614	37	97.696	41	78.512	34	14.765
317	a0013E12	22,30,44,64,7,77,83	83138	170662	143323	141749	0.989018	61	24	76	423	6572	94264	55.234	94264	157748	92.433	2245	42	90.357	53	304.811	30	10.067
318	a0013F11	23,34,42,60,75,87,9	82310	144671	158654	158391	0.998342	49	9	92	12758	15703	35996	24.881	46693	141330	97.691	1459	25	96.527	32	150.438	8	26.25
319	a0013H04	18,27,45,5,59,69,88	81966	153601	124518	117348	0.942418	55	97	83	181	1748	31793	20.698	54401	169589	110.409	7401	114	84.768	213	77.291	403	17.203
320	a0013I01	22,28,40,58,69,86,9	82386	117841	95164	93311	0.980528	61	20	76	235	5159	24311	20.63	36509	103190	87.567	1506	35	85.808	45	364.911	23	13.174
321	a0013I16	13,22,39,51,58,73,83	82820	143297	125124	121528	0.971261	49	51	91	188	2786	30554	21.322	45459	142089	99.157	2719	56	89.546	72	159.514	133	26.278
322	a0013J01	14,27,47,61,69,8,84	82962	145298	123696	117074	0.946466	31	77	97	146	1782	13802	9.499	23407	137278	94.48	3232	106	82.483	242	85.471	437	10.911
323	a0013K04	15,3,34,47,54,68,89	83046	167234	146678	146476	0.998623	61	50	76	313	2853	23663	14.15	37867	142692	85.325	3956	80	82.661	110	262.164	3	52.667
324	a0013K22	26,3,38,52,55,73,80	82678	157528	120389	116761	0.969864	37	61	91	437	2127	13551	8.602	22341	129775	82.382	4492	111	77.862	253	126.913	135	20.481
325	a0013L09	11,14,35,48,53,76,91	83284	148124	119991	116211	0.968498	43	54	90	203	2134	22840	15.42	36774	115265	77.817	1152	44	72.08	145	273.393	88	19.477
326	a0013M03	1,26,38,50,62,74,86	83466	137544	84752	82268	0.970691	31	62	93	147	1659	58668	42.654	58668	102867	74.788	3259	85	65.266	304	150.678	126	15.619
327	a0013M11	22,37,41,60,68,9,91	83556	151489	86067	81036	0.941546	37	45	95	154	3481	80822	53.352	80822	156664	103.416	1254	41	96.389	159	12.264	226	15.575
328	a0013M15	10,25,27,42,57,72,87	83194	150035	157308	156443	0.994501	61	16	77	507	9019	130802	87.181	130802	144316	96.188	1750	32	94.403	49	171.367	0	0
329	a0013O07	17,36,49,5,56,70,91	82306	176947	147858	146539	0.991079	61	19	76	473	8926	55676	31.465	63157	169610	95.854	2459	35	93.829	44	246.045	15	6.2
330	a0013P01	19,3,38,47,59,74,79	83084	171590	116112	110573	0.952296	37	63	95	159	2831	109156	63.614	109156	178407	103.973	2226	67	89.778	197	65.208	430	10.916
331	a0013P03	14,37,51,56,78,8,91	83176	138079	156357	156160	0.99874	61	5	77	4206	27465	126844	91.863	126844	137326	99.455	870	16	98.563	14	119.071	6	52.833
332	a0014E09	13,24,29,41,60,73,80	82346	157752	112592	111816	0.993108	61	33	75	377	3390	16018	10.154	52107	111874	70.918	7538	85	62.922	189	301.026	18	88.778
333	a0014F01	23,38,40,55,70,8,85	82768	144844	109771	104913	0.955744	61	36	75	325	4251	27030	18.661	59817	153058	105.671	4330	62	92.254	162	43.988	165	24.806
334	a0014F08	15,36,44,65,7,73,81	82940	148284	130838	124582	0.952185	55	83	81	187	1721	21970	14.816	31436	142865	96.346	5812	139	77.896	360	65.542	539	17.035
335	a0014F09	10,22,29,44,54,72,85	81988	151446	110255	109959	0.997315	55	33	81	530	2923	22629	14.942	31540	96466	63.697	2717	56	60.68	86	679.698	35	31.286
336	a0014F13	12,21,30,52,61,70,79	82450	165528	158833	158688	0.999087	55	32	83	1204	4369	39386	23.794	45767	139826	84.473	5196	69	81.091	119	260.966	9	27.111
337	a0014G01	16,27,4,50,59,67,87	82862	151793	111779	109004	0.975174	61	52	71	426	2315	25786	16.988	35691	120405	79.322	6206	97	72.808	141	285.326	67	15.597
338	a0014G06	26,32,50,54,6,70,85	83076	142890	149581	149139	0.997045	55	11	86	521	12640	111716	78.183	111716	139046	97.31	3364	35	93.36	48	184.479	25	25.32
339	a0014G07	12,23,36,51,55,74,82	83640	156852	141016	140693	0.997709	49	64	82	637	1726	5510	3.513	18422	110472	70.431	3971	110	68.385	245	200.339	33	15.303
340	a0014G15	12,24,35,45,54,75,82	82242	158749	166923	165968	0.994279	55	57	81	608	2379	68628	43.231	68628	135630	85.437	3808	84	81.557	132	212.955	60	19.467
341	a0014H19	14,39,41,5,59,67,91	82510	182441	147258	146225	0.992985	55	26	85	187	6734	91977	50.415	91977	175101	95.977	1597	45	93.948	62	163.484	83	10.916
342	a0014I02	10,19,37,51,61,67,82	83024	157267	142991	141493	0.989524	31	21	98	180	7156	85676	54.478	85676	150293	95.566	2304	43	91.888	157	75.299	83	11.277
343	a0014J01	2,26,30,40,56,78,80	83080	180753	88316	80809	0.914998	61	46	72	232	3998	92189	51.003	92189	183910	101.747	6322	78	83.333	201	142.09	115	13.626
344	a0014K20	1,21,29,51,61,72,84	83444	140029	111008	110560	0.995964	43	40	90	475	2233	10933	7.808	20741	89325	63.79	1603	54	62.073	148	353.385	24	33.667
345	a0014L05	1,18,30,50,65,75,80	83214	142212	141781	141473	0.997828	61	30	75	263	3882	62580	44.005	62580	116475	81.902	3188	56	79.32	71	412.901	2	46.5
346	a0014L09	19,38,40,64,71,87,9	82566	136645	105822	102527	0.968863	49	37	90	182	3745	74505	54.524	74505	138569	101.408	1653	41	94.312	78	74.821	173	11.191
347	a0014L11	10,26,35,50,58,72,79	83254	178407	179672	179436	0.998686	61	13	77	8340	13081	23347	13.086	49993	170060	95.321	2586	41	96.055	55	112	95	9.253
348	a0014M17	10,15,39,43,53,69,91	82888	156778	115499	112389	0.973073	37	50	94	175	3009	97853	62.415	97853	150473	95.978	1875	45	90.346	108	126.907	134	10.664
349	a0014N05	26,37,41,64,67,8,89	83238	186840	129981	125731	0.967303	61	12	77	9021	14853	39081	20.917	54470	178242	95.398	2319	42	92.988	52	221.404	67	23.701
350	a0014N13	11,15,28,50,55,69,79	83028	139744	96579	93003	0.962973	31	47	98	132	2884	127047	90.914	127047	135562	97.007	1338	33	91.086	134	87.769	58	12
351	a0014N16	25,30,49,56,77,8,86	82372	172089	144911	144194	0.995052	61	33	76	1251	4392	14103	8.195	38727	144955	84.233	5830	75	80.527	96	348.5	3	18.333
352	a0014O04	21,27,3,47,55,77,87	83064	142491	129321	128931	0.996984	55	37	84	524	3308	43975	30.862	52086	122425	85.918	4623	75	82.846	92	264.489	10	11
353	a0015B24	21,38,43,5,62,69,90	82448	162616	159470	159466	0.999975	49	23	90	1988	4746	11046	6.793	18942	109160	67.127	2391	41	65.275	89	631.045	8	38.25
354	a0015C08	1,22,28,45,60,73,84	82184	153457	118065	115101	0.974895	43	37	93	172	3785	91612	59.699	91612	140074	91.279	1458	44	82.846	141	174.418	113	15.319
355	a0015C10	25,34,47,64,7,72,84	82368	140875	120923	114022	0.942931	55	52	85	176	2891	65777	46.692	66383	150372	106.741	3389	55	92.51	99	77.283	143	20.287
356	a0015E02	1,18,38,48,61,77,83	82410	170654	103041	97864	0.949758	43	78	87	185	1642	26533	15.548	41340	128138	75.086	4672	119	63.913	346	159.627	369	17.217
357	a0015E14	13,25,36,46,55,76,83	82968	136401	170585	170561	0.999859	73	54	60	1535	3270	8506	6.236	33147	176608	129.477	1423	134	27.54	102	298.412	107	639.234
358	a0015F08	12,25,27,44,63,71,81	82648	163284	168245	167890	0.99789	61	18	76	974	8679	32442	19.868	36147	156235	95.683	4781	52	92.435	66	187.152	0	0
359	a0015F12	1,23,33,44,56,69,83	83404	158229	158436	158121	0.998012	61	32	75	480	4336	19865	12.555	52534	138760	87.696	3553	62	82.966	66	377.318	84	24.393
360	a0015F16	1,23,32,41,63,72,81	83032	135123	143483	143379	0.999275	43	52	88	485	1890	7366	5.451	36273	98291	72.742	2406	69	70.549	196	202.128	6	29.667
361	a0015G07	2,26,34,52,54,66,88	82792	174106	136041	132599	0.974699	55	64	84	260	2747	23736	13.633	50538	175834	100.992	8035	126	89.468	181	78.497	285	14.484
362	a0015G16	1,20,36,49,59,66,83	82860	164532	143462	142107	0.990555	55	22	86	190	7170	90782	55.176	90782	157760	95.884	1645	36	93.486	41	244.683	35	19.571
363	a0015G17	25,29,3,41,61,76,86	83010	158139	137115	132853	0.968917	55	46	85	184	3392	88861	56.192	88861	156040	98.673	5068	69	82.926	143	175.182	173	11.272
364	a0015G22	26,39,47,63,74,8,80	83384	146996	115513	114009	0.98698	55	51	85	195	2618	45401	30.886	55384	133540	90.846	4525	69	78.533	94	319.255	91	16.989
365	a0015H12	18,38,42,56,67,8,88	83608	203560	201177	201053	0.999384	79	75	54	1552	3560	9765	4.797	33877	267051	131.19	2469	197	21.397	147	360.619	182	587.874
366	a0015I01	11,16,29,50,53,77,83	83132	159818	143681	142830	0.994077	55	41	84	493	3627	38714	24.224	44606	148721	93.056	6038	98	87.266	159	116.522	47	38.809
367	a0015J12	25,31,50,56,6,75,81	82836	154211	139057	138490	0.995923	55	29	85	1132	4824	71810	46.566	71810	139921	90.733	7917	76	82.559	146	182.301	5	56
368	a0015K07	1,23,36,40,61,73,89	82502	157060	116770	114586	0.981297	61	22	76	246	6516	37532	23.897	42965	143357	91.275	1828	40	89.494	45	349.756	26	29.269
369	a0015L04	2,24,34,45,57,70,84	82532	148174	114120	113617	0.995592	55	19	85	817	5709	28243	19.061	33263	108478	73.21	3230	47	69.495	92	483.467	26	27.731
370	a0015L22	17,39,45,5,61,74,84	82974	133159	122316	122018	0.997564	43	33	91	575	2736	21284	15.984	24800	90294	67.809	1130	59	66.055	108	401.269	23	81.043
371	a0015M13	21,36,52,56,7,74,80	82818	155215	149128	147777	0.990941	73	24	61	2550	10366	131918	84.99	131918	248801	160.294	1390	83	34.055	52	145.269	81	1170.41
372	a0015N13	12,24,31,46,56,74,87	82772	143523	91188	85977	0.942854	49	81	84	204	1182	8020	5.588	17145	95752	66.715	3258	110	57.752	290	193.938	296	14.841
373	a0015O10	13,23,34,46,59,73,88	82286	167754	121854	118368	0.971392	55	65	83	179	2524	41625	24.813	60538	164076	97.808	4330	72	88.135	77	223.922	219	12.155
374	a0015O16	11,21,36,43,55,72,81	83010	179576	142830	140318	0.982413	31	85	96	302	1583	14474	8.06	53253	134635	74.974	1018	83	71.542	409	121.692	90	14.789
375	a0016A18	2,20,27,49,60,73,88	82086	172190	73680	70300	0.954126	43	56	77	237	1245	12576	7.304	23220	69749	40.507	2147	90	38.963	234	442.368	83	19.108
376	a0016A19	10,23,32,50,64,74,80	82584	161045	128293	125000	0.974332	31	74	93	220	1924	14290	8.873	34406	142408	88.427	2385	105	80.471	459	59.95	289	13.609
377	a0016C21	25,31,52,62,74,8,88	83308	144912	75513	69897	0.925629	55	94	78	183	1120	14234	9.823	39808	105297	72.663	7892	153	56.665	339	169.566	412	12.898
378	a0016D02	13,26,35,40,54,77,83	83374	157830	123217	118905	0.965005	43	41	91	180	3381	40200	25.47	50764	138652	87.849	2812	43	80.94	132	212.924	86	22.977
379	a0016D21	13,22,31,40,62,71,80	82042	149603	129590	128098	0.988487	55	41	83	270	3106	70317	47.002	70317	127350	85.125	3808	58	79.89	89	332.798	65	7.169
380	a0016E18	10,22,35,49,64,67,84	83006	185876	94697	86163	0.909881	61	17	77	884	5290	23278	12.523	32554	89942	48.388	4552	46	44.447	58	1775.69	12	22.5
381	a0016E22	14,37,52,59,71,88,9	81938	139244	180042	179802	0.998667	61	33	74	950	3942	14270	10.248	33861	130117	93.445	5735	79	88.578	159	85.478	121	19.116
382	a0016F01	12,19,27,49,59,70,82	82542	157683	148082	143574	0.969557	31	54	98	160	2821	40999	26.001	62112	152350	96.618	1822	59	91.133	296	41.936	103	15.223
383	a0016G03	17,28,41,56,73,79,8	82926	160646	104370	103272	0.98948	31	60	96	324	1935	23977	14.925	43515	116119	72.283	1986	71	69.113	301	161.767	90	10.3
384	a0016G12	15,35,43,65,75,86,9	83010	152737	121249	117658	0.970383	37	60	93	177	2429	42723	27.972	44545	145757	95.43	2545	66	88.51	160	95.362	78	29.372
385	a0016H18	2,26,33,49,61,69,86	82242	151937	110569	106241	0.960857	55	94	82	195	1378	9217	6.066	21668	129593	85.294	9950	167	70.839	414	96.215	200	22.37
386	a0016I12	10,16,33,48,61,72,81	83168	148088	144809	144686	0.999151	49	37	87	935	3084	10762	7.267	32710	114134	77.072	1727	55	75.922	98	361.724	7	29.571
387	a0016I24	23,36,44,5,60,71,90	82544	121862	111275	110663	0.9945	37	17	92	620	5330	45567	37.392	45567	90617	74.36	1201	30	73.28	52	622.308	10	20.1
388	a0016L04	26,28,51,56,6,69,90	82916	166586	133508	131012	0.981304	61	19	76	284	8787	86576	51.971	86576	166954	100.221	3105	43	94.986	94	66.479	74	28.419
389	a0016L16	11,17,30,50,64,72,87	82660	149850	97187	93520	0.962269	43	52	89	191	2033	17443	11.64	38462	105735	70.561	2315	76	66.722	137	347.416	134	16.948
390	a0016O02	12,14,38,45,61,73,81	82668	167974	177556	177083	0.997336	31	41	97	702	3578	11951	7.115	55744	146706	87.339	1523	54	86.387	309	73.466	13	12.692
391	a0016O04	1,23,29,45,58,68,88	82906	157457	168551	168323	0.998647	67	7	69	11578	29010	115081	73.087	115081	203076	128.972	1728	52	62.978	50	863.36	36	420.139
392	a0016P20	17,3,39,43,55,75,90	82842	154296	152640	152217	0.997229	49	37	89	318	3687	37166	24.087	60004	136438	88.426	2720	60	86.591	100	199.57	11	66.636
393	a0017A08	2,26,38,51,65,67,83	82620	164774	151518	151085	0.997142	55	37	84	469	3860	79260	48.102	79260	142837	86.687	2917	76	86.423	103	216.175	4	26.5
394	a0017A23	24,31,5,52,61,71,82	82370	153232	156380	155124	0.991968	49	31	90	182	4824	35886	23.419	65656	149572	97.611	2422	37	93.727	87	104.713	45	11.178
395	a0017C10	22,33,52,53,6,75,79	82582	167753	123590	121749	0.985104	55	44	85	194	3640	86505	51.567	86505	160161	95.474	3457	64	88.106	73	266.877	67	7.03
396	a0017C24	10,20,31,43,56,70,85	83010	120741	117641	117205	0.996294	61	22	74	490	4176	24124	19.98	36258	91885	76.101	2876	47	73.733	62	511.532	0	0
397	a0017D05	2,24,35,48,63,67,86	82882	161584	73115	58289	0.797224	31	136	92	149	834	8209	5.08	20284	113510	70.248	4744	210	58.523	920	65.962	476	13.309
398	a0017D10	11,23,29,42,62,76,84	83428	156624	105429	101455	0.962306	49	70	89	177	2293	35215	22.484	78019	160544	102.503	4745	70	87.594	116	148.034	191	11.822
399	a0017F01	12,16,36,46,59,75,81	82628	183205	196128	195910	0.998888	37	24	95	1278	6777	34657	18.917	76020	162662	88.787	326	31	87.336	77	289.325	41	22.512
400	a0017F04	23,30,41,56,7,75,85	82336	150938	131646	128743	0.977948	61	50	74	364	2764	31982	21.189	61937	138217	91.572	4058	76	85.932	104	191.346	112	11.911
401	a0017H15	21,27,52,57,68,8,85	83086	156214	127022	126534	0.996158	61	28	77	305	5093	115753	74.099	115753	142606	91.289	3212	59	89.171	89	187.011	9	30.222
402	a0017H22	25,34,48,54,78,8,81	83262	156310	123997	118853	0.958515	55	52	85	180	3183	48555	31.063	67320	165566	105.922	4010	61	93.887	64	86.859	297	13.455
403	a0017I08	11,19,28,51,62,74,87	83318	148645	149377	147799	0.989436	55	38	85	205	3837	30860	20.761	36570	145831	98.107	3390	47	91.665	63	175.81	110	11.936
404	a0017J09	17,37,43,61,78,81,9	83076	166278	86094	81667	0.948579	55	90	84	178	1787	49614	29.838	62728	160910	96.772	7119	94	80.77	195	152.928	182	11.835
405	a0017J18	16,28,4,40,65,77,89	83132	157865	67649	60605	0.895874	61	85	70	228	1331	29831	18.897	30820	113174	71.69	9482	157	59.717	272	218.044	361	11.87
406	a0017K04	12,21,39,40,63,69,84	83452	166727	160054	159769	0.998219	61	2	77	83646	83646	167111	100.23	167111	167293	100.339	1173	10	98.346	11	240.636	2	55
407	a0017K18	12,23,37,41,61,71,84	82674	166308	87519	82569	0.943441	61	30	74	195	5483	86254	51.864	86254	164503	98.915	3799	40	84.764	125	195.184	123	7.65
408	a0017L05	23,29,50,6,60,72,86	83024	168740	108553	106209	0.978407	61	47	75	564	3241	39106	23.175	41783	152349	90.286	9589	118	81.776	122	234.672	180	11.789
409	a0017L09	23,33,48,5,55,67,84	82192	143402	146862	146646	0.998529	55	16	84	1523	8559	37021	25.816	60860	136953	95.503	3999	49	92.801	68	150.235	5	21.4
410	a0017L20	22,34,41,5,56,66,84	83104	169046	131094	120897	0.922216	55	126	84	180	1502	44940	26.584	55399	189253	111.954	6449	153	88.803	167	46.988	810	13.68
411	a0017M18	19,33,47,5,61,75,89	82594	162532	147367	147073	0.998005	55	47	82	489	3000	25836	15.896	45186	141029	86.77	5778	98	83.587	185	141.724	3	152.333
412	a0017M21	1,21,34,40,65,70,81	82218	170258	145525	145241	0.998048	55	25	85	792	5922	47742	28.041	65057	148059	86.962	4944	69	83.494	101	271.475	23	29.739
413	a0017N12	12,25,28,47,56,68,83	82594	164693	95987	90731	0.945243	49	86	89	175	1949	31690	19.242	60275	167681	101.814	4667	76	90.417	114	122.974	180	9.794
414	a0017N18	15,27,41,5,57,75,82	82788	156502	122022	119820	0.981954	61	18	75	431	8512	56778	36.279	61854	153232	97.911	3081	44	94.957	56	132.5	42	11.238
415	a0017P18	19,29,49,53,6,67,91	82954	155104	137009	135720	0.990592	43	39	92	227	3536	69183	44.604	69183	137923	88.923	2067	45	82.733	94	268.766	70	21.686
416	a0018A20	19,35,43,56,74,8,84	82306	150018	173370	173248	0.999296	61	36	75	1460	3718	14184	9.455	39836	133858	89.228	4939	72	85.816	96	221.51	1	13
417	a0018B02	10,17,39,50,63,78,82	82362	159937	78212	77830	0.995116	73	48	57	796	2484	12263	7.667	41339	119232	74.549	1388	133	10.949	153	599.817	131	386.672
418	a0018B06	11,20,28,48,54,72,89	82632	174693	143247	141711	0.989277	49	58	85	278	2119	18050	10.332	36601	122934	70.371	3543	100	68.117	207	259.56	71	27.718
419	a0018B12	11,16,28,47,60,67,81	82578	171629	112452	107993	0.960348	31	61	98	130	2771	50211	29.256	59767	169035	98.489	2380	64	91.692	229	50.044	238	11.761
420	a0018B14	16,31,51,6,63,67,89	83088	154164	117803	111476	0.946292	37	52	93	158	2904	57693	37.423	62801	151055	97.983	957	41	92.938	117	80.316	126	11.825
421	a0018B16	13,26,36,43,60,74,85	83332	164627	78620	69053	0.878313	43	83	85	188	1271	10038	6.097	27086	105516	64.094	2643	108	49.81	585	134.125	205	20.312
422	a0018B17	14,29,51,54,6,77,81	83188	147088	101621	100486	0.988831	55	73	84	383	1747	8906	6.055	23439	127594	86.747	10263	156	77.229	238	136.668	73	13.247
423	a0018C10	1,21,37,49,57,74,87	82452	159394	121314	119016	0.981057	31	58	98	143	2601	38907	24.409	42852	150876	94.656	2031	71	88.591	215	74.084	126	17.921
424	a0018D02	11,22,27,52,58,71,91	82318	177550	81353	77904	0.957605	61	29	73	329	3935	94962	53.485	94962	114143	64.288	3880	42	51.041	102	847.775	49	9.245
425	a0018D06	13,19,30,46,54,67,85	82890	178736	137810	134697	0.977411	37	43	95	174	3563	100815	56.404	100815	153211	85.719	1245	57	81.248	234	132.385	136	18.669
426	a0018D10	22,27,3,44,60,75,89	83340	157473	156985	156704	0.99821	61	28	75	898	4838	88626	56.28	88626	135466	86.025	3265	55	83.355	79	322.873	20	35.2
427	a0018D21	1,15,32,52,62,75,91	82518	162539	118187	116703	0.987444	37	36	94	190	3682	34216	21.051	38203	132561	81.556	1955	48	79.048	124	268.234	92	8.63
428	a0018D23	24,3,34,46,60,76,81	82768	140160	138897	138490	0.99707	43	48	90	344	2227	17438	12.441	26624	106914	76.28	1382	62	75.479	132	258.727	6	36.167
429	a0018E15	13,25,31,44,64,78,86	83288	173451	91613	84469	0.92202	55	92	83	179	1977	21805	12.571	41402	181897	104.869	7923	136	90.066	273	43.033	392	13.987
430	a0018E19	13,25,29,51,65,71,82	82324	147091	137913	136624	0.990654	25	24	99	206	5929	82083	55.804	82083	142301	96.744	1569	33	93.936	112	76.438	15	23.933
431	a0018F03	1,14,35,51,62,68,82	83092	154645	134595	130596	0.970289	49	54	91	176	2990	47129	30.476	60606	161460	104.407	3597	46	95.422	58	96.121	174	8.649
432	a0018F14	20,36,4,52,55,71,87	83142	190804	109692	105153	0.958621	43	104	85	234	1378	9331	4.89	21283	143363	75.136	6088	194	68.141	616	86.291	448	17.04
433	a0018F15	12,26,33,46,65,77,82	82406	148260	158825	158572	0.998407	61	17	76	1040	7990	43061	29.044	44850	135846	91.627	2030	38	89.976	54	266.148	17	28.765
434	a0018G08	10,21,34,49,53,72,80	83196	150917	128392	127130	0.990171	55	44	84	350	3101	31006	20.545	40383	136475	90.431	3159	40	81.141	143	187.615	52	31.385
435	a0018G12	22,31,49,63,73,79,9	82816	163575	108372	103002	0.950448	25	72	98	172	2124	36090	22.063	50815	152974	93.519	3373	114	83.101	622	38.815	271	12.911
436	a0018H01	18,30,44,60,78,8,85	82624	154821	126834	126725	0.999141	61	22	75	1197	4532	58262	37.632	58262	99725	64.413	2528	44	62.319	53	1091.15	10	50.7
437	a0018H08	1,22,27,42,54,76,82	82998	152539	173458	173340	0.99932	61	19	76	1908	7787	29442	19.301	61624	147965	97.001	4953	55	93.632	72	132.306	3	62.667
438	a0018H09	14,30,44,56,66,87,9	83456	155317	109799	109358	0.995984	73	58	57	743	2950	24750	15.935	40150	171129	110.18	1689	153	17.106	158	355.12	182	399.121
439	a0018H12	19,31,44,58,73,8,89	82692	145907	175836	175078	0.995689	61	21	75	1492	6738	88656	60.762	88656	141499	96.979	4283	52	92.656	71	150.38	3	13
440	a0018H20	23,31,43,59,6,66,90	82790	161862	122052	119132	0.976076	49	45	86	237	2894	30884	19.08	63252	130258	80.475	3106	69	74.184	84	466.738	201	12.836
441	a0018I09	25,3,35,46,58,71,85	82712	178801	99453	95835	0.963621	55	65	83	184	2428	40340	22.561	48555	157840	88.277	4455	75	79.398	77	454.13	204	9.162
442	a0018I10	1,24,39,46,58,75,84	82928	149757	160760	160369	0.997568	55	15	85	1521	9734	73791	49.274	73791	146023	97.507	3193	39	93.167	44	208.932	25	41.6
443	a0018I14	1,16,36,48,65,74,88	82950	142062	152205	151668	0.996472	61	24	76	319	5707	98117	69.066	98117	136974	96.418	4543	56	91.676	61	187.131	17	24.118
444	a0018I17	18,3,34,51,56,75,82	83176	142552	136596	135863	0.994634	37	29	93	310	4201	24160	16.948	37434	121857	85.482	1742	51	83.654	123	179.48	51	24.039
445	a0018I22	25,34,46,6,61,66,87	83586	155139	142975	142497	0.996657	55	25	85	748	5907	25190	16.237	55400	147677	95.19	4035	51	91.72	57	222	7	27.286
446	a0018J06	23,38,51,6,62,71,91	82702	173462	97337	90742	0.932246	61	29	74	211	6120	58052	33.467	66278	177501	102.328	4976	56	91.315	76	167.605	230	10.117
447	a0018J24	1,15,37,41,53,73,88	82452	152604	169129	168978	0.999107	73	51	60	1798	4404	19916	13.051	43706	224614	147.187	1911	130	25.927	127	181.449	132	681.78
448	a0018K02	18,31,45,6,60,76,80	83478	153263	138551	137817	0.994702	43	15	94	1938	8448	41364	26.989	46449	126723	82.683	2964	47	80.152	173	165.902	22	78.136
449	a0018K16	1,22,38,49,55,69,91	82546	151104	108127	103589	0.958031	61	30	76	401	4709	31832	21.066	42211	141284	93.501	4227	66	88.133	59	268.203	174	12.109
450	a0018K18	12,20,28,49,57,78,86	83474	155129	138402	134324	0.970535	31	60	97	152	2555	100736	64.937	100736	153305	98.824	4050	89	86.173	229	77.498	306	12.098
451	a0018K19	26,33,43,56,72,9,91	82462	175706	160767	159453	0.991827	55	29	85	281	5978	44130	25.116	53166	173362	98.666	4946	64	92.965	66	173.106	54	17.333
452	a0018K22	1,18,33,46,57,66,86	82990	148283	127706	125577	0.983329	61	28	75	583	5037	87463	58.984	87463	141057	95.127	2274	45	89.711	220	55.405	139	22.072
453	a0018M08	10,25,36,43,59,71,79	82596	149119	119096	113868	0.956103	25	45	98	180	3197	73172	49.07	73172	143904	96.503	3045	64	91.176	226	53.027	121	9.702
454	a0018M09	26,29,3,51,53,74,88	82470	157381	116207	114959	0.989261	73	43	60	1465	4228	22174	14.089	37477	181822	115.53	2245	125	22.758	90	559.056	106	672.16
455	a0018M12	23,3,30,50,57,77,84	83572	172757	159218	158104	0.993003	61	29	77	301	4838	112673	65.221	112673	140312	81.219	4704	43	95.376	57	122.789	58	17.052
456	a0018M18	23,28,47,54,6,75,84	82660	161430	105592	97153	0.920079	25	49	99	171	3380	38518	23.86	67156	165622	102.597	1040	49	95.007	200	29.195	212	10.481
457	a0018M22	11,16,37,48,62,66,86	83646	163579	67878	56322	0.829753	49	131	81	194	1030	18048	11.033	33602	134956	82.502	8422	174	64.615	306	171.775	425	12.518
458	a0018N12	12,17,31,41,60,75,86	83092	177536	148352	147774	0.996104	61	35	75	995	3960	35171	19.811	44154	138606	78.072	7615	96	73.605	128	365.555	2	35
459	a0018N19	14,31,47,62,76,89,9	81534	109545	139524	139487	0.999735	61	24	75	842	4128	56473	51.552	56473	99087	90.453	2636	46	87.952	80	164.975	0	0
460	a0018O02	20,3,37,41,58,75,79	83118	190742	122989	115659	0.940401	37	66	78	167	2116	42669	22.37	48948	139659	73.219	3190	102	68.943	697	77.829	424	11.771
461	a0018O12	18,29,4,50,55,70,82	83754	148557	97322	92082	0.946158	55	60	84	177	2652	47598	32.04	58467	159127	107.115	5364	67	92.087	99	86.808	274	11.54
462	a0018O14	18,34,4,52,59,68,79	83472	153661	122079	121818	0.997862	55	44	82	352	2542	21316	13.872	49656	111860	72.797	4526	81	69.065	153	308.941	6	44.5
463	a0018O16	19,29,3,46,57,75,87	84114	150172	116236	113077	0.972823	61	49	75	756	2650	12897	8.588	31393	129881	86.488	8347	120	76.869	240	127.933	96	42
464	a0018O22	21,33,4,40,55,78,83	82978	147333	138884	135117	0.972877	61	26	76	559	5551	26147	17.747	70323	144336	97.966	4293	56	91.699	106	100.245	74	21.676
465	a0018O24	1,18,28,44,53,68,89	82312	173534	140150	136145	0.971423	49	104	80	236	1194	7401	4.265	37501	124177	71.558	3689	118	62.904	207	293.382	388	9.394
466	a0018P20	12,23,33,42,63,70,89	82938	185417	82995	76281	0.919104	25	74	98	167	2263	44992	24.265	64695	167491	90.332	3023	80	80.63	354	98.514	110	9.473
467	a0019A05	14,32,4,45,53,69,80	82546	75929	118342	118093	0.997896	61	1	77	71280	71280	71280	93.877	71280	71280	93.877	796	8	92.768	10	549.1	0	0
468	a0019B19	10,15,32,48,63,77,90	83296	173055	159979	158823	0.992774	31	34	97	309	4676	39028	22.552	46734	158991	91.873	1203	48	90.044	193	85.503	68	10.691
469	a0019C03	22,31,47,57,7,74,85	82182	172000	134906	130985	0.970935	25	48	99	129	3539	61510	35.762	69495	169907	98.783	992	46	94.648	161	49.143	124	10.427
470	a0019C14	16,34,50,64,76,86,9	83574	166782	97708	93529	0.95723	25	59	99	152	2697	71238	42.713	74958	159124	95.408	2234	54	87.703	191	101.251	64	18.297
471	a0019C23	13,14,27,52,63,73,82	82206	174617	146001	143844	0.985226	49	34	91	176	4868	82871	47.459	82871	165533	94.798	1036	28	90.965	31	473.452	95	11.568
472	a0019D11	10,16,31,42,62,78,90	82990	163033	136061	135466	0.995627	55	46	84	525	2910	48317	29.636	52086	133877	82.117	4804	80	78.991	103	332.117	8	5.375
473	a0019D16	20,29,45,5,55,72,83	82318	158028	139893	138680	0.991329	43	37	93	305	3611	20173	12.765	47261	133615	84.551	2289	56	81.74	130	215.823	92	8.685
474	a0019E01	2,25,39,44,53,66,83	82572	174210	163378	163084	0.9982	61	34	76	595	4579	81851	46.984	81851	155699	89.374	4962	73	84.466	79	337.114	13	33
475	a0019E08	1,17,34,52,58,78,86	83076	158109	127239	126731	0.996008	43	34	91	414	3571	37467	23.697	39516	121447	76.812	2653	55	75.894	148	257.52	0	0
476	a0019E18	14,3,37,46,54,74,80	82300	153313	75701	65491	0.865127	61	68	71	250	2073	27866	18.176	51997	140972	91.95	6399	110	74.372	177	189.316	366	15.798
477	a0019F01	1,24,36,50,53,71,91	82048	151706	156942	156724	0.998611	37	24	95	598	5817	33131	21.839	40775	139628	92.039	864	39	90.132	127	107.969	38	33.105
478	a0019F03	12,22,33,45,58,72,87	82412	184878	119151	114772	0.963248	43	54	92	200	3197	48181	26.061	58001	172643	93.382	2625	68	87.781	150	129.8	232	13.453
479	a0019F08	12,14,37,42,55,76,79	83196	191738	80343	67315	0.837845	31	139	94	134	1279	19706	10.278	30321	177879	92.772	5105	163	79.093	438	75.872	616	11.127
480	a0019F12	14,27,45,55,6,70,90	82838	177028	102900	93619	0.909806	49	118	85	182	1457	25195	14.232	37393	172033	97.178	8837	176	79.508	297	97.515	528	13.852
481	a0019G03	10,20,30,40,63,73,83	82760	142337	102225	101414	0.992067	61	39	76	203	2722	28002	19.673	42034	106184	74.6	3419	67	70.476	71	580.099	26	32.192
482	a0019G14	20,38,47,6,60,77,85	82918	180077	135924	132774	0.976825	37	30	96	156	5887	129790	72.075	129790	176629	98.085	1750	38	93.325	72	131.014	107	24.178
483	a0019G21	26,33,42,53,66,8,81	83070	169465	153425	152455	0.993678	37	14	96	1093	10960	51248	30.241	57138	153451	90.55	2123	32	88.24	91	214.703	17	23
484	a0019I07	24,27,44,62,68,88,9	82326	164108	134929	131789	0.976729	31	34	98	145	4427	37451	22.821	66362	150537	91.73	2137	52	88.805	118	148.72	38	21.658
485	a0019I18	22,33,4,50,60,76,85	82478	157678	164829	163999	0.994964	43	18	95	181	8281	25294	16.042	41496	149074	94.543	1074	24	92.484	24	468.042	58	10.655
486	a0019J04	16,2,33,40,63,76,79	83446	160962	101718	97001	0.953627	55	73	84	181	2069	76622	47.603	76622	151048	93.841	4893	81	82.638	117	216.932	201	12.766
487	a0019J19	11,22,28,42,64,68,80	83450	167265	90018	89922	0.998934	73	50	58	1067	2038	4164	2.489	19263	101917	60.931	685	102	17.31	93	1102.76	80	446.925
488	a0019K13	20,34,50,55,75,8,84	82826	142500	138371	136616	0.987317	61	14	77	2142	10213	33952	23.826	68347	142994	100.347	5679	41	90.411	74	184.351	3	7.667
489	a0019K23	18,37,50,57,6,71,79	82896	176992	155671	155270	0.997424	73	34	59	685	6440	45042	25.449	53706	218973	123.719	1230	96	51.271	63	363.413	70	905.014
490	a0019L01	11,26,36,41,54,75,91	83050	181542	209016	208894	0.999416	61	37	75	1211	4580	43883	24.172	59976	169473	93.352	5092	78	90.013	105	171.981	5	14.4
491	a0019L09	1,26,33,48,58,76,89	83346	138106	131177	130693	0.99631	55	11	84	1100	10088	88598	64.152	88598	110975	80.355	2183	24	74.373	35	1009.23	1	69
492	a0019M04	15,38,52,57,66,79,9	83068	157168	145775	145641	0.999081	61	21	76	1283	6359	37628	23.941	44919	133543	84.968	4097	52	81.956	71	391.859	12	44.833
493	a0019O01	14,3,34,50,62,70,87	82758	167605	123584	121568	0.983687	55	37	85	179	4681	118608	70.766	118608	173198	103.337	2214	32	94.254	48	163.208	173	10.387
494	a0019O03	20,32,44,56,68,8,80	82854	160799	105376	102015	0.968105	43	40	93	175	4059	111244	69.182	111244	162384	100.986	1420	36	94.65	77	87.714	145	12.745
495	a0020C05	20,38,49,53,76,79,8	82572	167725	76194	71329	0.93615	43	74	77	210	1123	11038	6.581	15413	83136	49.567	3457	118	46.48	623	138.856	214	15.229
496	a0020C18	17,31,50,61,77,8,85	82764	175345	95506	88952	0.931376	43	66	92	177	2631	41232	23.515	76702	173698	99.061	1741	68	93.703	174	43.132	265	13.347
497	a0020D06	24,38,4,46,61,70,86	82962	185553	131937	129225	0.979445	55	68	81	207	2414	29934	16.132	59570	164191	88.487	6547	107	79.945	149	235.315	142	15.148
498	a0020F20	16,3,37,40,64,70,84	82620	170382	132565	132322	0.998167	55	38	78	861	2777	17650	10.359	26106	105563	61.957	5089	76	58.517	122	573.066	46	16.63
499	a0020F21	11,17,36,42,61,67,86	82784	164140	107705	105262	0.977318	31	56	97	173	2307	39516	24.075	47302	129232	78.733	2556	74	75.055	193	205.788	118	10.398
500	a0020H14	11,23,34,44,53,74,81	82696	185623	117348	111444	0.949688	43	49	92	175	3713	52931	28.515	61979	181966	98.03	2447	45	91.6	89	151.899	202	10.262
501	a0020I08	16,34,46,5,65,78,85	83032	161603	146998	146599	0.997286	61	37	76	278	3796	34059	21.076	60373	140466	86.92	2784	73	86.103	97	225.814	29	19.103
502	a0020J10	10,22,28,41,61,75,83	82866	154897	95535	92377	0.966944	43	40	91	181	2954	61801	39.898	61801	118169	76.289	1971	44	72.308	100	419.18	82	11.902
503	a0020M24	12,18,29,45,53,66,84	82824	164242	93861	88571	0.94364	37	54	94	153	3116	70966	43.208	71315	168316	102.48	915	29	96.768	55	75.436	128	9.055
504	a0020O07	17,33,40,5,64,66,85	83152	166893	153014	151528	0.990288	61	18	77	335	8712	33242	19.918	76237	156816	93.962	3596	48	90.883	51	287.804	23	23.348
505	a0021A02	17,29,41,5,53,78,90	83080	148941	144273	142536	0.98796	55	30	85	178	5091	96554	64.827	96554	152739	102.55	1893	30	97.612	28	95.857	82	10.646
506	a0021B13	12,15,37,52,60,74,81	83014	147576	157161	156273	0.99435	55	29	83	947	4508	43212	29.281	46918	130749	88.598	3262	63	82.819	132	170.652	48	58.938
507	a0021B20	26,27,47,5,60,66,91	82434	146416	134307	134141	0.998764	73	48	60	1327	4074	29892	20.416	38489	195565	133.568	1000	119	23.265	96	337.781	119	671.639
508	a0021B21	25,34,45,5,58,73,90	83374	166755	113385	110582	0.975279	55	39	85	176	4463	151166	90.652	151166	174062	104.382	1620	22	92.691	22	489.409	121	11.744
509	a0021E22	20,31,5,51,54,66,87	82884	148312	142240	141552	0.995163	61	27	77	668	5282	34442	23.223	46605	142614	96.158	5005	68	92.826	78	129.244	31	18.032
510	a0021F22	26,30,46,61,75,8,88	82966	181485	95185	90329	0.948984	49	96	85	189	1401	9540	5.257	21487	134541	74.133	4135	125	66.675	209	271.708	329	11.222
511	a0021H03	12,15,32,50,56,76,84	82616	139921	151153	151103	0.999669	43	46	89	565	2210	51603	36.88	51603	101663	72.657	1116	53	71.605	158	250.513	2	74.5
512	a0021H13	12,19,30,45,64,74,88	83358	148461	99044	98516	0.994669	37	43	87	361	1897	14873	10.018	22937	81571	54.944	1878	67	53.242	188	363.346	34	32.588
513	a0021H14	14,2,28,44,62,69,91	83244	155200	91201	78236	0.857841	37	113	91	151	1463	83269	53.653	83269	165362	106.548	2327	103	82.373	523	30.75	702	16.061
514	a0021J16	1,24,34,44,54,77,87	83096	169987	132587	129817	0.979108	55	36	86	180	4564	46014	27.069	53545	164328	96.671	2557	45	89.69	99	163.485	91	14.736
515	a0021J21	24,34,51,62,67,79,8	82666	129925	119740	117610	0.982211	61	26	75	343	4497	62285	47.939	62285	116933	90	2458	54	86.912	65	247.785	46	19.543
516	a0021L01	19,29,50,56,7,73,88	82756	171293	168059	167648	0.997554	67	34	68	2013	6026	43861	25.606	72601	204913	119.627	2080	133	57.664	163	214.736	120	312.642
517	a0021M16	2,24,39,47,61,68,81	82202	161603	137747	137342	0.99706	55	28	85	359	5356	38351	23.732	56833	149988	92.813	3968	68	87.451	81	231.728	80	18.875
518	a0021N12	17,39,47,54,7,73,91	82966	140118	123242	120781	0.980031	61	23	76	1159	5556	23970	17.107	32829	127799	91.208	4825	68	86.392	87	210.368	36	21.25
519	a0021O04	15,38,49,6,61,74,88	82482	135643	138980	138878	0.999266	67	31	69	1672	4791	34723	25.599	42730	148543	109.51	1155	125	52.133	83	432.928	137	211.642
520	a0021P15	12,24,28,50,64,70,81	81894	166585	132466	130250	0.983271	31	44	98	133	3818	115611	69.401	115611	168002	100.851	2342	49	92.752	132	74.174	166	13.753
521	a0022A08	20,37,47,63,72,87,9	83020	165596	158531	157769	0.995193	37	17	97	252	9617	37020	22.356	79268	163502	98.735	1132	32	96.246	80	62.375	34	36.059
522	a0022A11	14,36,49,53,74,86,9	83300	150555	86174	76542	0.888226	25	59	99	151	2563	76041	50.507	76041	151225	100.445	2904	53	85.31	272	76.118	85	16.624
523	a0022B15	24,30,4,48,65,68,83	83112	174474	187101	186992	0.999417	61	39	75	1535	3896	14696	8.423	37718	151958	87.095	6192	83	83.463	115	250.791	1	12
524	a0022C04	10,26,33,44,59,78,88	82782	130838	35514	35514	1	73	33	58	1042	1308	1727	1.32	5153	43187	33.008	583	74	3.598	55	1951.8	54	347.815
525	a0022C05	13,19,33,42,59,71,91	82482	167139	97228	94724	0.974246	49	58	89	220	2401	37280	22.305	39003	139313	83.352	3785	87	77.175	137	257.854	169	16.704
526	a0022C08	1,16,35,45,59,77,86	82268	149833	116185	113608	0.97782	55	52	81	188	2349	19043	12.709	43955	122173	81.539	2575	68	74.17	126	287.492	155	15.987
527	a0022C09	26,37,40,61,7,74,79	83104	183273	109771	106107	0.966621	61	26	75	199	6359	86619	47.262	86619	165358	90.225	3295	56	83.259	94	310.117	155	9.877
528	a0022C12	12,26,39,51,62,72,81	82196	162673	136107	132814	0.975806	61	22	76	492	7478	37023	22.759	70961	164523	101.137	5263	62	95.826	66	87.833	86	11.547
529	a0022D07	11,19,35,46,65,66,88	82404	171199	135132	128349	0.949805	55	81	82	250	2058	18601	10.865	24158	166723	97.385	10020	168	84.815	274	77.201	184	26.321
530	a0022D15	11,14,27,50,57,74,88	82500	149357	149405	149005	0.997323	61	17	77	705	8550	98263	65.791	98263	145352	97.319	4306	44	93.588	46	205.935	2	52
531	a0022E06	2,21,28,49,58,68,79	83010	140477	145734	145316	0.997132	61	21	76	456	6049	23539	16.756	31696	127030	90.428	2897	44	87.876	52	316.442	16	36.062
532	a0022E19	20,33,44,5,53,73,91	82760	187014	98158	95684	0.974796	25	80	96	200	1619	16736	8.949	33449	129547	69.271	4855	139	66.309	389	157.144	81	23.173
533	a0022E22	16,30,50,63,69,8,81	82208	138717	121059	120937	0.998992	43	52	85	512	1500	5052	3.642	10811	78002	56.231	1242	68	54.858	183	337.492	60	14.317
534	a0022I16	19,34,41,53,70,79,9	82388	150225	138438	137461	0.992943	55	42	85	194	3157	43191	28.751	56260	132617	88.279	2552	57	84.439	84	266.714	88	11.045
535	a0022I22	15,28,47,59,77,8,88	82476	136709	91784	87099	0.948956	43	73	88	179	1630	18845	13.785	37199	118995	87.043	1403	66	80.106	96	261.917	178	11.534
536	a0022I23	13,20,30,43,59,78,87	82072	163647	107689	103741	0.963339	61	29	75	212	5607	45745	27.953	56399	162612	99.368	2985	49	94.024	97	86.722	82	16.671
537	a0022K23	19,27,42,5,64,67,90	82498	144358	136615	136404	0.998456	61	13	77	470	10443	36125	25.025	58191	135766	94.048	2004	30	91.773	168	63.887	2	571.5
538	a0022L15	19,2,28,42,61,72,88	82714	151838	87210	86121	0.987513	31	66	92	195	1266	20146	13.268	27875	83574	55.042	2314	142	58.921	565	107.712	89	17.034
539	a0022M03	20,27,40,59,6,71,89	82556	162061	167429	167273	0.999068	49	7	92	10400	22671	79691	49.173	79691	158700	97.926	906	17	97.148	27	162.111	6	40.833
540	a0022M18	2,24,28,40,60,75,85	82482	180206	133277	130192	0.976853	55	54	83	188	2842	37062	20.566	42850	153473	85.165	5952	98	76.71	119	327.496	232	12.922
541	a0022N04	2,21,36,47,54,70,82	82950	138578	121120	120858	0.997837	73	75	59	959	2255	5068	3.657	18587	169195	122.094	2348	203	24.746	152	257.882	167	389.749
542	a0022O01	19,37,46,5,59,76,84	82200	147205	131217	127134	0.968884	55	61	83	181	2472	42895	29.14	43997	150817	102.454	4999	84	89.731	135	86.326	292	11.856
543	a0022O03	13,23,31,50,54,69,82	82690	144324	89277	89259	0.999798	79	33	54	1377	3199	10798	7.482	17783	105598	73.167	1534	81	14.404	102	807.078	105	392.514
544	a0022P22	13,15,31,48,53,72,79	83570	162344	141076	139863	0.991402	61	38	74	1100	3174	8629	5.315	20805	120614	74.295	5832	83	69.714	105	463.838	59	7.864
545	a0023A13	2,22,39,40,64,72,90	82692	178230	140622	138882	0.987626	31	48	97	203	3352	42493	23.842	56346	160909	90.282	5167	107	83.942	313	85.051	134	14.918
546	a0023A18	11,25,39,40,54,68,82	82718	134527	122156	116537	0.954001	61	20	75	797	6678	87919	65.354	87919	133565	99.285	2762	42	90.137	41	287.488	51	29.039
547	a0023B01	2,23,36,41,64,66,86	83136	167731	147711	145070	0.98212	55	35	85	427	4801	22172	13.219	38673	168052	100.191	8605	88	88.966	193	82.948	159	15.711
548	a0023C12	1,25,30,42,61,74,81	82426	162213	86657	79644	0.919072	55	110	82	179	1544	59174	36.479	75181	169860	104.714	6395	114	80.066	191	139.743	592	9.534
549	a0023D24	26,3,36,46,56,66,89	82610	136708	121578	121408	0.998602	61	32	77	198	3332	33972	24.85	36680	106644	78.009	1934	64	76.869	65	470.354	25	41.96
550	a0023E15	17,28,40,53,67,7,82	83364	162693	166176	165076	0.993381	61	10	77	1555	16214	107415	66.023	107415	162147	99.664	3125	25	95.796	28	244.286	0	0
551	a0023F22	11,17,38,48,60,74,90	82570	150262	144087	143945	0.999014	37	36	94	529	3604	32552	21.663	38886	129746	86.347	1147	51	83.927	126	180	35	42.057
552	a0023G01	18,38,5,52,60,75,84	83384	178129	100408	96964	0.9657	37	42	95	155	4005	51231	28.761	52966	168238	94.447	1519	48	90.399	93	164.108	114	16.149
553	a0023H04	20,28,43,6,65,68,91	82888	147894	124534	124308	0.998185	55	40	79	728	2528	20513	13.87	30548	101126	68.377	4289	72	65.176	100	514.15	3	29.333
554	a0023L18	21,31,4,47,56,71,79	83692	139547	145321	145224	0.999333	55	5	86	17081	27767	98001	70.228	98001	138838	99.492	248	7	99.187	20	54.05	1	53
555	a0023L24	14,3,33,47,56,73,85	82696	160369	109242	108843	0.996348	55	50	83	443	2169	9679	6.035	17388	108488	67.649	3815	104	67.419	298	168.966	181	10.486
556	a0024B20	10,25,31,41,55,73,82	83370	144874	89604	85303	0.952	61	55	74	253	2258	13742	9.485	33278	124190	85.723	7354	110	74.041	222	151.68	289	13.616
557	a0024E04	17,33,44,63,77,86,9	82620	69573	116269	116053	0.998142	67	17	69	909	5509	72479	104.177	72479	93661	134.623	1811	59	45.316	60	498.883	58	139.862
558	a0024K17	12,23,30,46,58,66,83	82540	172465	92074	84323	0.915818	49	86	91	172	2211	148543	86.129	148543	190148	110.253	3337	49	72.365	209	218.263	208	9.822
559	a0024K18	22,31,48,60,67,8,82	82902	145497	136178	135103	0.992106	55	24	85	194	5765	72579	49.884	72579	138360	95.095	1965	34	91.953	44	257.5	20	18.9
560	a0024O14	18,3,32,45,57,68,91	82438	148823	151743	151322	0.997226	61	26	76	498	5156	34400	23.115	52212	134061	90.081	3347	53	87.708	70	261.343	0	0
561	a0024O15	17,33,43,60,71,8,89	82682	152986	109533	106313	0.970602	61	27	76	212	5312	34988	22.87	54418	143439	93.76	3719	60	88.913	66	230.227	134	13.187
562	a0024P10	24,32,46,53,66,85,9	82990	160870	177308	177070	0.998658	37	50	92	589	2862	19733	12.266	63570	143108	88.959	2788	63	81.156	260	109.869	51	34.294
563	a0024P16	13,19,37,41,57,72,86	82454	141341	84960	75580	0.889595	55	56	80	223	1503	15985	11.31	35535	84216	59.584	4277	83	40.414	147	556.265	105	23.314
564	a0024P20	11,16,39,41,61,73,90	82416	146160	108408	108120	0.997343	31	18	98	732	5265	27483	18.803	29009	94786	64.851	1157	30	63.041	326	164.215	18	26.944
565	a0025B14	15,3,39,49,58,66,86	82762	142002	122340	121991	0.997147	61	26	76	706	4151	30465	21.454	42990	107950	76.02	4896	66	72.379	78	500.769	8	20.375
566	a0025D14	14,33,50,6,65,78,89	82616	172983	182253	181793	0.997476	61	28	76	1417	5793	37563	21.715	47288	162221	93.779	6756	73	88.895	82	232.561	19	7.368
567	a0025F24	18,34,42,55,7,73,83	82662	147402	96611	88782	0.918964	61	68	72	237	2034	14120	9.579	36727	138313	93.834	13094	163	73.278	412	79.483	302	21.993
568	a0025H20	10,20,38,51,59,75,86	82830	138723	137519	137417	0.999258	49	44	81	870	1906	5763	4.154	10631	83869	60.458	3767	67	57.091	131	452.832	9	22.667
569	a0025L11	10,26,30,48,54,74,82	82530	200060	195272	195089	0.999063	43	40	92	885	4568	44673	22.33	47533	182749	91.347	1786	57	89.81	144	137.125	16	40.062
570	a0025L17	26,27,4,46,57,73,81	82484	165564	143542	140642	0.979797	61	21	75	326	7304	46243	27.931	47726	153388	92.646	3266	48	88.197	70	264.371	102	10.157
571	a0025L19	17,27,51,63,76,8,90	83188	161449	157159	156820	0.997843	61	2	77	78121	78121	135470	83.909	135470	156243	96.775	2213	16	94.058	19	490.737	9	29.889
572	a0025N05	17,3,34,41,64,77,80	83652	166083	190346	190181	0.999133	55	26	84	1773	5990	32463	19.546	60394	155745	93.775	3811	58	91.443	91	153.198	7	38.571
573	a0026A19	26,32,40,63,75,89,9	82152	141665	126339	126091	0.998037	55	27	85	296	4610	33728	23.808	40011	124476	87.866	1938	47	86.661	87	216.264	3	27
574	a0026B01	25,29,47,53,73,81,9	82760	170734	96315	95961	0.996325	49	42	85	407	2209	47570	27.862	47570	92786	54.345	2010	58	53.141	103	775.485	2	64.5
575	a0026B03	1,17,37,48,63,69,79	83188	160650	156644	156395	0.99841	55	33	82	831	3722	17511	10.9	31267	122843	76.466	2811	58	75.782	90	423.478	19	41.789
576	a0026C03	24,36,45,64,67,80,9	82838	170984	164621	163704	0.99443	49	28	91	451	5953	57887	33.855	58115	166704	97.497	2722	61	93.984	113	69.345	84	29.167
577	a0026C09	1,14,29,46,65,73,83	83054	164640	173201	172906	0.998297	61	21	76	1369	7463	53840	32.702	56026	156724	95.192	4796	60	91.594	92	147.424	2	138.5
578	a0026D13	13,25,27,45,53,77,91	82798	189797	152512	152365	0.999036	43	35	93	1181	4124	89687	47.254	89687	144374	76.068	2118	54	74.904	141	334.319	20	24.6
579	a0026E05	19,3,39,50,65,71,81	82916	159868	141151	140277	0.993808	61	13	76	3681	12088	44270	27.692	70465	157146	98.297	3371	36	95.554	36	186.667	33	11.758
580	a0026K03	16,28,43,61,69,7,80	82948	174111	98886	98535	0.99645	55	64	81	536	1606	25143	14.441	26755	102815	59.051	7680	120	54.786	149	527.51	4	30.75
581	a0026M03	16,2,30,44,58,72,86	83114	180011	158823	158821	0.999987	37	68	91	575	1784	4559	2.533	14734	121340	67.407	3342	102	64.91	322	193.618	15	54.733
582	a0027A05	19,39,43,57,68,89,9	82622	144350	90171	86264	0.956671	49	61	84	182	1813	55398	38.378	55398	110614	76.629	2143	62	68.078	102	432.706	169	11.503
583	a0027B11	13,23,28,41,62,78,89	82908	172637	154089	153073	0.993406	61	18	77	600	9254	45132	26.143	72514	166585	96.494	2955	40	94.55	57	163.772	11	6.636
584	a0027D05	1,25,37,50,64,66,82	82570	155775	158005	157724	0.998222	43	3	96	32100	51805	120991	77.67	120991	155415	99.769	613	10	99.194	20	52.25	6	35
585	a0027D10	14,37,49,6,63,66,84	82920	183722	125339	119790	0.955728	37	67	94	169	2688	56257	30.621	77892	180101	98.029	2393	86	87.391	262	71.561	201	21.975
586	a0027D15	14,28,50,54,66,8,86	82286	163623	171011	171001	0.999942	49	44	85	1035	2540	8433	5.154	28078	111768	68.308	2567	64	66.361	152	358.987	8	59.375
587	a0027E21	1,19,27,51,65,69,89	83354	164169	157836	157523	0.998017	49	34	87	1125	3696	15399	9.38	39421	125691	76.562	4663	70	73.708	132	325.705	4	42.75
588	a0027F06	12,24,36,48,60,72,84	83228	180089	99389	91328	0.918894	61	80	72	281	2045	17689	9.822	26950	163676	90.886	10323	154	79.026	212	163.481	244	12.762
589	a0027F16	11,20,37,49,56,71,81	83158	170120	100650	95600	0.949826	31	83	96	143	1672	70471	41.424	70471	138791	81.584	2257	84	73.01	326	133.669	199	11.754
590	a0027F21	10,26,37,43,57,66,83	83008	157709	133181	129962	0.97583	25	39	99	171	4029	111355	70.608	111355	157150	99.646	1804	46	90.981	204	65.221	92	9.978
591	a0027H13	13,23,30,47,61,72,80	83118	155771	167544	167513	0.999815	25	50	98	1080	2491	11228	7.208	21617	124594	79.985	772	63	79.114	250	127.408	21	32.524
592	a0027H15	14,27,46,58,7,76,87	82388	155175	184839	184813	0.999859	55	44	81	791	2940	11522	7.425	33089	129385	83.38	2942	72	80.59	108	270.787	25	35
593	a0027H20	10,16,27,43,64,77,82	82668	156161	92259	92259	1	61	28	73	767	1906	4811	3.081	9190	53386	34.187	3807	55	31.327	83	1285.35	15	37.067
594	a0027H21	1,23,28,42,65,71,86	82998	155962	94643	94643	1	55	28	81	1361	2462	6543	4.195	13080	68959	44.215	5419	68	40.562	102	908	4	21.25
595	a0027H24	19,32,4,43,65,72,90	83080	160619	158451	157008	0.990893	49	44	90	207	3343	51569	32.106	52099	147103	91.585	1211	66	85.632	190	106.753	115	24.304
596	a0027I14	14,29,4,49,61,78,87	83510	143458	77549	75143	0.968974	55	56	71	182	1627	73247	51.058	73247	91148	63.536	3052	92	62.542	124	425.395	64	15.438
597	a0027J05	10,22,27,51,55,78,81	83380	153544	173458	173438	0.999885	61	27	75	1170	4459	9615	6.262	54383	120400	78.414	4017	57	75.735	85	437.906	4	8.75
598	a0027J10	19,3,37,44,53,77,90	83384	148425	103628	101745	0.981829	55	37	82	196	2974	58825	39.633	58825	110070	74.159	2633	49	67.301	69	681.203	99	15.465
599	a0027J20	21,31,51,55,69,8,80	83400	160117	106988	102548	0.9585	55	89	83	192	1669	13747	8.586	28163	148567	92.787	8209	160	77.768	244	114.914	407	18.572
600	a0027J22	19,38,4,48,62,67,89	83110	166649	145591	144536	0.992754	61	33	77	660	4833	43404	26.045	46134	159494	95.707	7208	85	88.073	97	194.691	32	31
601	a0027K13	22,34,43,62,7,78,91	82520	139706	116869	111992	0.95827	55	56	84	177	2657	90362	64.68	90362	148845	106.542	4967	57	86.262	207	87.213	111	10.27
602	a0027K16	10,16,36,44,53,76,87	83502	147395	49452	49021	0.991284	43	32	72	319	1162	7343	4.982	11311	37206	25.242	1651	54	24.697	92	1200.46	7	78.714
603	a0027L01	24,30,52,64,66,8,84	82308	148360	200368	200311	0.999716	79	59	54	2023	3447	6766	4.561	27260	203427	137.117	2754	150	34.689	115	195.539	134	555.291
604	a0027L02	17,39,48,57,66,8,88	82428	146396	116719	113478	0.972232	61	29	76	261	4969	112309	76.716	112309	144117	98.443	3636	47	88.658	46	315.696	137	15.197
605	a0027L18	15,30,5,50,62,66,88	82926	186182	151162	148740	0.983977	31	27	98	140	6859	145700	78.257	145700	185211	99.478	1857	30	85.467	130	198.046	134	9.791
606	a0027M05	20,32,45,59,74,9,90	83460	138334	161716	161142	0.996451	61	41	74	877	3093	12953	9.364	23199	126847	91.696	7487	104	82.943	161	127.28	172	18.047
607	a0027O21	16,2,34,43,56,73,81	82232	171759	113006	108778	0.962586	61	30	75	201	5474	30707	17.878	67360	164245	95.625	3368	45	87.504	121	166.455	125	10.576
608	a0027P01	26,3,31,44,65,68,79	82960	146421	80713	80294	0.994809	55	38	76	627	1708	5172	3.532	18642	64940	44.352	4655	73	39.832	102	862.588	5	23
609	a0027P24	25,31,4,48,63,76,87	83104	158724	176482	176143	0.998079	61	13	76	5072	11470	46610	29.365	55184	149117	93.947	3327	38	91.311	46	294.326	4	63
610	a0028A06	1,14,28,43,59,76,81	83802	158810	155772	155488	0.998177	49	38	88	770	3543	69467	43.742	69467	134670	84.799	3907	69	80.878	153	187.464	56	30.107
611	a0028A09	16,3,31,48,54,75,85	82930	199669	138317	137178	0.991765	31	38	98	171	4860	75141	37.633	83290	184696	92.501	1804	50	90.893	155	112.91	43	15.884
612	a0028C03	15,29,47,5,56,69,86	82976	153929	113675	112297	0.987878	37	25	96	164	5116	67214	43.666	67214	127919	83.103	661	29	80.63	74	394.892	32	18.562
613	a0028E05	10,16,37,47,59,73,89	82216	145007	137709	136903	0.994147	37	30	94	724	4205	31937	22.024	32404	126179	87.016	1724	46	83.499	90	254.089	41	25.829
614	a0028F18	25,30,4,45,57,66,85	82166	147030	117828	117208	0.994738	61	31	75	763	3529	73332	49.876	73332	109411	74.414	5925	79	69.82	123	356.146	18	31.5
615	a0028G10	26,32,49,5,64,77,88	82942	171498	57148	57140	0.99986	43	20	86	681	1911	5654	3.297	11034	38223	22.288	672	26	21.835	100	1340.51	0	0
616	a0028H05	11,25,38,50,61,71,80	82560	169139	158001	157420	0.996323	61	19	76	1071	7868	85479	50.538	85479	149495	88.386	4617	48	84.552	61	428.344	0	0
617	a0028H09	19,2,34,47,58,67,87	83002	160123	161626	161300	0.997983	61	21	77	545	7185	29310	18.305	68511	150894	94.236	5199	70	90.587	123	113.049	30	38.9
618	a0028I23	1,21,35,43,58,67,83	82666	148781	133142	130977	0.983739	61	21	75	668	6266	68328	45.925	68328	131590	88.445	3241	50	80.889	423	57.634	176	23.04
619	a0028J07	19,28,49,56,75,80,9	82394	162753	156662	155777	0.994351	25	27	99	216	5966	85666	52.636	85666	161090	98.978	506	32	96.532	130	37.169	71	11.451
620	a0028L14	20,3,35,48,59,68,88	82738	155754	163114	162811	0.998142	61	18	75	521	7824	80734	51.834	80734	140849	90.43	4073	46	87.284	70	281.357	4	27.75
621	a0028M03	16,27,42,61,71,85,9	82216	144236	116015	112218	0.967271	37	63	91	169	2136	29183	20.233	60561	134588	93.311	2904	74	86.15	116	151.06	191	12.848
622	a0028M15	11,21,30,51,58,77,82	83046	187315	125461	123748	0.986346	43	47	90	310	3039	22255	11.881	29633	142848	76.261	4746	97	73.493	274	176.091	64	21.906
623	a0028N04	10,17,38,47,57,68,80	83250	145757	159940	159806	0.999162	61	17	75	1908	6736	71269	48.896	71269	114523	78.571	3459	43	76.078	58	599.259	6	18.5
624	a0028O18	21,37,42,62,7,71,82	83382	133059	128702	125833	0.977708	43	16	93	201	7657	101087	75.972	101087	122527	92.085	684	21	90.37	58	216.379	27	9.778
625	a0029A05	16,39,4,47,53,70,85	83058	189526	163996	163460	0.996732	55	30	85	593	5655	100546	53.051	100546	169679	89.528	2423	55	86.706	58	405.552	72	23.236
626	a0029B03	13,14,36,40,65,72,87	83342	167319	151915	151129	0.994826	61	23	77	339	7434	30647	18.317	77512	170995	102.197	5036	57	95.821	67	94.522	24	27.458
627	a0029C06	17,2,35,43,54,68,85	82904	155593	179253	179084	0.999057	67	47	67	1015	3884	18749	12.05	38928	182573	117.34	3473	170	52.482	251	155.829	164	212.323
628	a0029C13	10,19,28,50,59,68,90	82746	157984	152317	152227	0.999409	43	51	87	730	2225	5483	3.471	21282	113511	71.85	2995	78	69.568	167	282.946	14	58.929
629	a0029C18	10,21,33,46,60,75,91	82836	134422	156011	155851	0.998974	61	18	77	4784	6990	20508	15.256	27495	125836	93.613	3623	44	90.346	55	233.982	3	36
630	a0029D03	12,26,34,49,58,74,84	83778	155601	94471	94317	0.99837	55	58	78	316	1276	4994	3.209	17192	74028	47.576	4407	117	42.345	205	421.293	179	18.698
631	a0029D16	21,3,30,43,60,68,80	83116	141085	131753	129621	0.983818	61	16	76	240	8938	81381	57.682	81381	143017	101.369	2877	28	95.476	42	143.857	27	12.593
632	a0029E09	16,3,36,50,58,73,82	83022	159601	135574	134829	0.994505	79	40	53	723	4431	22501	14.098	42458	177279	111.076	2138	130	34.369	149	321.933	166	342.042
633	a0029E20	24,35,4,50,56,66,80	82502	140242	180601	180527	0.99959	55	39	83	1255	3303	11325	8.075	22821	128841	91.87	4843	85	87.374	126	133.302	20	45.55
634	a0029F01	16,35,51,64,7,74,81	83196	149506	97754	93674	0.958263	43	39	93	169	3881	119668	80.042	119668	151387	101.258	1763	36	94.623	68	101.353	112	10.241
635	a0029F21	13,16,34,41,63,74,87	83036	150077	26883	24970	0.92884	61	21	73	248	1630	20994	13.989	20994	34241	22.816	2045	31	18.976	42	2869.74	84	12.726
636	a0029G06	1,18,27,41,60,71,87	82550	169718	157640	157377	0.998332	61	21	77	300	7341	44447	26.189	44691	154164	90.835	3846	57	87.331	106	185.415	77	23.987
637	a0029H06	18,28,52,64,77,9,91	82846	153366	122672	111922	0.912368	55	79	84	178	2163	30352	19.791	79362	170882	111.421	5690	99	83.149	271	72.085	617	10.225
638	a0029H14	16,31,5,50,60,74,79	83252	153180	96105	96051	0.999438	61	33	73	706	2334	42764	27.917	42764	77043	50.296	2510	52	48.585	78	1009.56	1	11
639	a0029J06	26,38,4,40,58,66,90	82394	170918	158520	158263	0.998379	25	16	99	159	10214	104445	61.108	104445	163438	95.624	806	27	94.547	184	48.027	27	17.889
640	a0029J07	16,2,31,47,64,69,88	82536	150522	154217	154155	0.999598	43	43	90	974	2549	7400	4.916	20247	109629	72.833	2212	64	70.913	145	299.455	27	13.37
641	a0029K04	10,24,31,44,63,75,80	83236	163567	155975	155462	0.996711	55	7	86	1108	23173	135089	82.589	135089	162212	99.172	1559	25	97.652	24	132.292	29	22.931
642	a0029K07	10,22,34,46,58,70,82	82600	163547	154404	153131	0.991755	55	36	82	736	4006	73873	45.169	73873	144221	88.183	4844	68	82.725	83	325.639	57	21.474
643	a0029K14	17,32,41,57,67,84,9	82530	187626	172167	171865	0.998246	61	28	76	1289	5474	25744	13.721	35656	153295	81.702	2776	63	90.015	74	240.554	33	28.303
644	a0029K21	24,32,45,63,73,8,88	83090	119234	72621	60692	0.835736	43	91	84	178	1091	20464	17.163	25627	99290	83.273	2723	116	69.474	349	85.057	534	12.569
645	a0029L09	23,35,45,53,72,89,9	82620	106539	89439	89221	0.997563	79	22	52	1612	5362	17687	16.601	53046	117977	110.736	1053	58	13.65	48	862.604	121	418.107
646	a0029L16	24,39,52,63,7,72,79	82768	149995	105780	105144	0.993988	55	54	83	233	2007	17315	11.544	22196	108410	72.276	3247	92	69.582	123	357.276	38	44.237
647	a0029M22	13,26,31,41,56,76,88	82828	158055	148594	144721	0.973936	73	33	60	2192	6802	27322	17.286	54625	224479	142.026	2003	129	41.191	129	138.14	197	381.371
648	a0029N21	10,14,33,41,64,76,90	83290	145096	136802	136608	0.998582	55	26	82	573	4525	63463	43.739	63463	117671	81.099	1969	52	79.675	100	285.03	28	35.286
649	a0029P03	22,38,4,52,64,74,82	83190	141838	142492	142399	0.999347	61	61	72	482	1448	4557	3.213	15845	88360	62.296	5156	96	57.874	129	462.752	2	28
650	a0030A18	11,16,32,46,58,68,89	82082	176750	170738	170039	0.995906	55	15	85	444	11855	126363	71.493	126363	177825	100.608	2209	25	97.455	72	46.708	32	35.5
651	a0030B14	23,27,44,6,61,78,82	82598	177084	74731	74579	0.997966	43	30	89	644	1766	5395	3.047	11314	52981	29.919	1685	43	28.818	109	1155.39	2	57
652	a0030B17	19,2,39,49,62,78,84	83598	154324	114056	111234	0.975258	25	41	99	176	3569	34148	22.127	52680	146348	94.832	1344	51	89.584	246	57.988	123	14.715
653	a0030D06	24,38,49,57,7,75,90	82800	169519	185896	185530	0.998031	55	36	83	1279	4298	29156	17.199	48470	154749	91.287	6683	85	86.35	115	194.974	55	13.036
654	a0030D21	20,27,4,51,53,72,82	83266	141451	113385	111294	0.981558	61	37	74	525	3009	26757	18.916	31158	111336	78.71	3559	62	73.613	74	483.135	110	14.291
655	a0030F01	1,22,36,43,56,75,87	82826	184430	160791	160181	0.996206	49	55	87	325	2229	13803	7.484	35449	122631	66.492	3531	113	65.637	303	199.472	79	37.165
656	a0030H11	19,39,42,54,75,79,8	83272	135386	127256	123565	0.970995	43	36	92	433	3049	13557	10.014	23054	109784	81.09	2133	55	76.11	122	246.852	87	25.609
657	a0030I20	18,27,48,55,74,79,8	82582	148441	194141	194138	0.999985	43	38	91	2014	3377	7860	5.295	23544	128346	86.463	3075	58	83.833	175	135.314	3	106
658	a0030I21	21,39,46,5,55,66,79	82728	139446	118758	118450	0.997406	55	22	84	589	4788	30647	21.978	51657	105354	75.552	4613	50	70.822	73	555.836	3	37
659	a0030J13	10,25,33,47,54,67,86	83086	124778	91421	89701	0.981186	55	55	82	189	1771	70257	56.306	70257	97413	78.069	2484	74	70.072	74	462.027	220	14.332
660	a0030K10	12,19,31,48,57,71,90	82580	143359	99968	96132	0.961628	43	46	88	204	2174	20190	14.084	21746	100036	69.78	865	54	67.445	108	420.222	89	14.449
661	a0030K11	15,27,42,6,60,68,79	82928	138664	139041	138333	0.994908	61	15	77	570	9234	98804	71.254	98804	138511	99.89	4306	34	91.682	36	317.611	5	20
662	a0030K16	13,14,37,43,58,69,89	83304	139182	160229	159245	0.993859	61	27	75	731	4847	73877	53.079	73877	130873	94.03	3334	45	87.268	61	289.639	2	26.5
663	a0030L16	24,33,45,5,60,78,86	82898	142588	129034	128845	0.998535	67	28	68	1145	5279	27000	18.936	54335	147836	103.681	2208	107	59.491	90	374.989	70	343.029
664	a0030M16	23,30,42,59,68,8,82	82908	133076	145917	145513	0.997231	61	8	76	1012	15601	109580	82.344	109580	124812	93.79	1445	28	94.23	38	184.474	9	74.333
665	a0030M20	13,22,28,44,57,67,87	82942	164984	124991	122347	0.978846	55	33	84	174	5147	163698	99.221	163698	169856	102.953	3056	21	90.525	39	386.256	71	8.014
666	a0030M23	18,2,36,43,65,76,89	82918	177278	45394	45350	0.999031	61	35	64	461	1043	2444	1.379	6908	36526	20.604	3527	68	20.734	125	1124.17	0	0
667	a0030N19	19,34,51,57,6,78,88	82358	173038	161329	159792	0.990473	61	30	74	771	5443	117846	68.104	117846	163299	94.372	6085	69	86.836	94	236.319	84	6.714
668	a0030O15	12,25,34,52,53,76,82	82762	143908	117067	113921	0.973127	55	70	82	200	1864	15620	10.854	34356	130533	90.706	7358	115	76.572	180	162.811	244	18.07
669	a0030P18	15,31,42,61,7,75,84	82644	174802	154706	154700	0.999961	73	49	59	2614	4164	7673	4.39	18461	204061	116.738	1504	119	15.487	90	667.167	100	876.85
670	a0031A02	21,36,51,53,6,68,83	83498	153290	98410	98060	0.996443	49	43	87	539	2046	22500	14.678	25205	88019	57.42	3171	72	55.706	109	619.872	8	41.5
671	a0031D09	21,36,5,50,63,75,86	83442	152376	141866	141591	0.998062	43	38	91	606	3336	23753	15.588	40982	126786	83.206	1670	52	81.911	84	326.869	1	106
672	a0031D19	12,20,37,50,59,77,91	83978	168239	123022	121334	0.986279	37	48	93	262	2746	23138	13.753	43043	131829	78.358	1825	57	76.667	174	223.575	14	25.286
673	a0031F17	13,21,35,42,55,74,86	82830	156070	157943	157931	0.999924	79	77	54	1552	2250	3388	2.171	11818	173275	111.024	848	163	13.548	137	434.314	171	441.076
674	a0031G06	11,18,34,46,54,71,84	83042	151388	138074	136953	0.991881	61	15	76	280	9623	102262	67.55	102262	144359	95.357	3310	38	91.659	39	309.692	50	10.98
675	a0031G11	14,33,52,58,77,8,83	83078	166583	138274	135205	0.977805	31	29	98	143	5714	61459	36.894	73251	165728	99.487	2748	55	93.335	147	63.415	70	25.443
676	a0031H03	18,36,50,60,66,81,9	82826	147472	115744	108160	0.934476	61	28	75	230	5509	35610	24.147	59627	154256	104.6	3173	52	92.42	65	96.892	306	15.948
677	a0031I05	16,32,4,52,63,78,84	83032	144455	69345	68649	0.989963	37	51	85	337	1287	5814	4.025	13268	65664	45.456	1890	100	47.024	519	144.083	65	26.877
678	a0031I17	15,2,37,42,56,66,85	82616	183218	153344	151282	0.986553	61	20	76	2143	9128	112436	61.367	112436	182576	99.65	5574	68	92.298	197	60.65	64	33.812
679	a0031I23	19,31,45,61,66,86,9	82500	149045	146352	146169	0.99875	55	38	82	904	3219	12440	8.346	21469	122343	82.085	3856	68	79.251	79	388.684	10	21.9
680	a0031J03	15,36,4,41,56,68,90	83306	152751	155240	154992	0.998402	31	41	97	502	3316	71748	46.971	71748	135961	89.008	1727	69	86.909	241	75.867	66	25.955
681	a0031L16	19,35,40,5,60,69,80	83038	143645	151319	151154	0.99891	37	22	95	1075	5703	64348	44.797	64348	125479	87.354	411	28	86.515	175	105.897	144	5.819
682	a0031M08	15,39,40,57,7,77,87	83620	152371	204770	204715	0.999731	61	39	73	1651	3434	23048	15.126	45732	133959	87.916	4122	67	84.621	100	226.94	24	30.792
683	a0031M16	19,3,30,49,63,72,89	82678	165136	99804	91930	0.921105	37	64	91	162	2459	38011	23.018	39444	157426	95.331	2154	63	87.866	199	92.688	140	11.379
684	a0031N06	16,39,50,62,7,75,89	82672	162249	91888	88561	0.963793	55	82	85	181	1952	40597	25.021	50091	160112	98.683	4523	92	88.636	118	139.212	183	10.989
685	a0031N08	15,37,49,64,69,9,90	82712	176908	103510	94109	0.909178	43	71	91	176	2437	31806	17.979	59069	173065	97.828	2513	79	85.805	165	128.376	308	12.76
686	a0031O02	22,28,50,6,62,77,82	83528	149348	98018	97740	0.997164	61	43	72	369	1967	18277	12.238	38126	84602	56.648	3516	70	53.8	83	827.94	6	46.667
687	a0031O05	13,14,29,45,62,67,86	83316	159225	124928	123024	0.984759	55	26	85	182	6009	80250	50.4	80250	156259	98.137	2144	33	93.261	70	139.9	81	11.568
688	a0031O06	12,19,39,46,53,73,80	82578	177638	110263	106036	0.961664	61	34	75	260	5212	65539	36.895	80224	177219	99.764	4904	59	91.26	51	255.725	188	13.213
689	a0031P10	11,24,34,41,58,72,83	83256	144882	109447	103426	0.944987	43	48	90	177	2729	93023	64.206	93023	131028	90.438	3227	54	81.224	122	215.803	74	11.824
690	a0032A16	12,18,34,47,57,77,81	82868	148533	147461	145989	0.990018	49	51	88	492	2636	71820	48.353	71820	134482	90.54	1599	45	86.379	127	156.425	19	19.263
691	a0032C06	19,34,40,63,77,8,82	82822	158300	122655	121171	0.987901	43	49	90	246	2152	10362	6.546	22811	105489	66.639	1995	65	63.745	132	425.909	55	21.291
692	a0032C13	17,36,4,48,53,77,81	82922	154006	114092	113856	0.997931	55	30	84	588	3332	22817	14.816	34404	99984	64.922	3000	57	62.281	80	721.288	9	42.889
693	a0032C17	19,27,45,60,72,8,81	82890	181450	217571	215954	0.992568	49	37	89	804	4423	26125	14.398	45566	163665	90.198	3224	63	86.522	130	177.2	79	17.975
694	a0032D14	15,28,4,43,60,66,87	82426	146915	94436	91303	0.966824	55	62	85	183	2335	43113	29.346	60863	144772	98.541	5491	78	88.448	101	153.653	175	8.303
695	a0032F06	13,16,32,48,64,67,83	82896	148011	116013	110779	0.954884	67	28	68	1222	7248	130774	88.354	130774	202962	137.126	3442	114	48.728	116	486.155	178	109.517
696	a0032F14	17,29,3,52,60,66,83	83096	159594	126381	123466	0.976935	49	53	91	181	2871	39861	24.977	59055	152210	95.373	4140	85	85.306	214	91.009	274	14.504
697	a0032G24	12,25,38,51,64,77,90	82402	148689	117780	115380	0.979623	37	33	96	150	4438	104659	70.388	104659	146455	98.498	1729	31	94.097	43	175.14	109	11.431
698	a0032H01	24,37,47,54,71,8,85	82978	151186	157132	156778	0.997747	67	43	68	961	3991	24516	16.216	38641	171620	113.516	2435	167	55.863	147	175.272	143	286.462
699	a0032H07	1,21,31,44,60,66,88	82908	148009	102781	98956	0.962785	55	51	83	191	2432	37241	25.161	37943	124053	83.814	5016	82	81.615	146	164.993	167	18.701
700	a0032H11	23,3,37,45,60,69,85	82898	161206	145389	144629	0.994773	37	39	93	673	3340	18188	11.282	29181	130272	80.811	2361	79	78.413	160	197.05	83	39.41
701	a0032H12	18,33,52,62,7,76,81	83026	157407	105481	104871	0.994217	43	37	89	294	2653	20371	12.942	39236	98194	62.382	1799	67	60.75	101	595.881	25	63.92
702	a0032H22	2,20,29,42,59,67,79	83658	165779	110263	106293	0.963995	61	20	75	199	8243	69321	41.815	71055	164867	99.45	4169	38	91.925	84	155.762	35	8.629
703	a0032I02	11,20,32,47,65,73,84	82382	157153	141195	140926	0.998095	61	46	73	909	2708	7938	5.051	27677	124568	79.265	7136	107	74.996	177	220.723	6	37.667
704	a0032I04	15,32,43,5,61,73,79	82862	169782	171179	169569	0.990595	61	27	75	569	6022	121747	71.708	121747	162602	95.771	4077	49	86.61	72	310.333	34	11.441
705	a0032J15	23,36,45,6,63,77,87	82990	149298	125634	125067	0.995487	61	49	75	515	2562	10549	7.066	26786	125539	84.086	6741	122	76.059	253	127.443	140	25
706	a0032K07	13,24,33,40,58,74,88	82416	135688	152025	152024	0.999993	79	65	53	1332	2545	4151	3.059	18016	165466	121.946	1311	140	17.466	138	303.377	115	609.765
707	a0032L04	13,18,32,42,61,76,87	82852	110455	103731	103532	0.998082	73	48	57	1003	2202	5994	5.427	15092	105743	95.734	949	112	22.664	101	452	108	368.231
708	a0032L22	11,22,39,49,65,74,89	82992	174203	151813	151379	0.997141	55	44	81	731	3277	12676	7.277	28352	144230	82.794	5817	102	78.111	160	225.206	51	41.157
709	a0032L24	10,20,33,49,55,77,89	83316	142545	131262	129833	0.989113	55	25	84	192	5568	120077	84.238	120077	139221	97.668	3773	45	92.224	89	112.034	74	15.041
710	a0032M02	11,19,34,43,59,69,86	82696	143117	132861	131188	0.987408	61	42	76	340	3124	16479	11.514	58668	131219	91.687	6646	110	79.267	162	155.759	140	31.707
711	a0032M10	19,27,3,40,58,68,83	83740	153413	149107	148152	0.993595	55	17	86	179	9141	53123	34.627	54163	155400	101.295	1125	18	98.471	29	62.276	61	8.836
712	a0032N01	15,35,4,51,63,71,88	83266	141415	179769	179405	0.997975	61	25	75	1785	5257	34963	24.724	43311	131443	92.948	4212	55	89.75	80	181.188	0	0
713	a0032N17	11,15,38,41,63,78,86	82716	159815	71592	60896	0.850598	61	99	69	274	1432	11951	7.478	21792	141774	88.711	11589	194	73.706	320	116.584	266	17.722
714	a0032O21	12,17,28,45,55,71,80	83092	172606	155675	153478	0.985887	61	23	75	697	6902	62772	36.367	66217	158747	91.971	4977	54	84.414	79	332.899	53	11.377
715	a0033A10	24,38,47,5,64,76,83	83010	138316	163027	162703	0.998013	61	6	77	4493	22987	76249	55.127	76249	137927	99.719	1578	17	97.154	20	196.8	0	0
716	a0033B16	14,2,38,48,57,78,85	82982	175651	161098	160924	0.99892	55	9	85	197	18238	106463	60.611	106463	164145	93.45	1728	23	91.95	42	319.952	22	31.909
717	a0033B21	23,31,44,62,7,72,87	83050	146955	109538	104812	0.956855	55	67	84	179	2170	36685	24.963	41680	145446	98.973	4408	105	83.898	173	90.491	374	21.412
718	a0033C09	1,15,29,43,57,71,85	82854	174663	99301	90785	0.914241	55	113	83	178	1700	26347	15.084	43190	192145	110.009	6099	132	91.839	206	34.024	563	12.87
719	a0033E07	12,14,28,41,53,77,87	82604	131402	122633	120143	0.979696	61	25	75	361	5072	29307	22.303	45427	126814	96.508	2194	51	93.769	54	114.556	121	16.545
720	a0033E10	18,2,37,46,58,73,91	82580	201326	178476	178323	0.999143	31	48	97	929	3472	17365	8.625	35341	166693	82.798	1398	63	81.722	191	189.037	18	38.5
721	a0033E17	11,24,38,40,56,73,91	83068	115388	147309	147079	0.998439	61	23	74	1665	4132	11638	10.086	28952	95046	82.371	2850	44	79.65	63	372.444	3	6
722	a0033F06	24,39,4,49,54,67,88	82992	156884	103111	102418	0.993279	43	47	86	323	1978	12505	7.971	19951	92984	59.269	2488	93	59.005	487	126.912	172	14.581
723	a0033I07	2,23,39,50,56,70,79	82852	145164	193246	193132	0.99941	67	62	67	1324	2844	8289	5.71	16001	176349	121.483	3987	225	53.108	206	107.607	203	226.128
724	a0033I13	25,36,5,51,57,67,81	82932	165490	155655	155516	0.999107	61	28	76	1412	5077	18471	11.161	37579	142159	85.902	3661	64	83.659	105	256.705	2	44
725	a0033J01	22,33,41,59,74,8,86	83250	145718	148160	148113	0.999683	25	31	98	1387	3960	65350	44.847	65350	122771	84.252	178	36	83.977	190	122.342	6	17.167
726	a0033J07	22,27,50,65,72,84,9	83228	156943	121451	121188	0.997835	49	39	84	404	2348	26719	17.025	26801	91584	58.355	2479	64	57.044	124	543.363	3	13.333
727	a0033J16	1,24,27,49,64,72,86	82332	173148	97601	93717	0.960205	55	68	84	180	2625	50677	29.268	63422	178531	103.109	4383	71	91.651	122	99.238	298	7.883
728	a0033K04	14,2,32,43,60,70,86	82580	157100	122486	120911	0.987141	61	3	77	902	52902	157523	100.269	157523	158707	101.023	1072	13	99.264	9	52.333	59	11.627
729	a0033M18	1,17,27,44,55,73,85	82208	166459	123516	116043	0.939498	61	32	75	375	5461	43050	25.862	55163	174752	104.982	7273	87	90.736	152	75.145	241	16.589
730	a0033M24	10,26,29,45,61,77,80	83068	157433	125410	124719	0.99449	61	36	75	666	3296	28107	17.853	34617	118672	75.379	4846	73	71.314	120	371.217	56	11
731	a0033O13	11,22,29,45,57,78,82	82812	159004	150484	150102	0.997462	61	18	76	849	7914	36656	23.054	44293	142460	89.595	1576	35	88.291	39	461.923	15	40.2
732	a0033O20	13,19,32,52,53,74,89	82754	150780	165565	164061	0.990916	61	21	75	1403	6779	73955	49.048	73955	142379	94.428	2011	39	91.342	46	263.022	59	16.186
733	a0033O21	12,22,31,52,59,78,83	82416	175555	166189	166105	0.999495	55	31	83	1354	4776	86266	49.139	86266	148078	84.348	4263	60	81.681	87	367.069	3	75
734	a0033P04	21,3,33,52,65,72,86	82338	164037	158062	156962	0.993041	43	23	92	2660	5175	10013	6.104	19020	119031	72.564	2707	41	70.719	154	310.63	18	10.778
735	a0034B19	21,32,4,50,62,68,81	82826	154926	125165	123997	0.990668	61	31	73	723	4041	89876	58.012	89876	125281	80.865	5631	69	74.619	123	312.512	49	18.02
736	a0034C19	24,36,44,61,74,8,83	82184	169433	153425	152799	0.99592	55	29	84	961	5000	22256	13.136	38062	145024	85.594	3575	60	83.288	90	311.289	9	33.222
737	a0034D13	26,3,34,40,57,72,85	83030	146906	102317	93093	0.909849	61	72	72	280	1559	9455	6.436	27947	112308	76.449	7323	137	65.378	202	242	100	19.78
738	a0034D17	14,28,51,57,72,83,9	82742	153099	154842	154689	0.999012	31	47	96	716	2624	33484	21.871	39186	123370	80.582	996	61	78.997	255	122.502	34	26.971
739	a0034D24	16,38,4,44,60,73,83	82922	174333	137463	136970	0.996414	61	44	76	273	3359	35496	20.361	54732	147800	84.78	5524	107	81.883	139	215.151	60	27.967
740	a0034E08	12,24,32,49,62,71,89	83516	171420	106814	98165	0.919027	37	94	91	157	1662	17399	10.15	43969	156309	91.185	4351	135	78.966	448	62.728	594	13.391
741	a0034F02	15,39,41,60,70,8,84	82330	134319	134405	134225	0.998661	79	41	54	2009	3773	9518	7.086	21930	154712	115.183	1655	118	21.132	116	373.603	116	539.629
742	a0034F12	1,15,34,45,61,69,82	82706	167681	95674	90752	0.948554	25	64	99	167	2587	48020	28.638	53083	165623	98.773	1719	59	92.134	185	63.411	135	10.8
743	a0034H04	14,31,43,5,63,78,88	82784	172241	139289	136786	0.98203	55	45	85	182	3853	49560	28.774	61833	173428	100.689	4712	61	94.523	70	127.1	47	11.426
744	a0034H07	16,33,46,55,73,8,87	83296	164082	187577	187356	0.998822	73	17	61	3503	13347	49124	29.939	96986	226905	138.288	982	60	57.476	46	98.022	60	1087.75
745	a0034I12	23,32,48,58,75,8,86	83384	185014	132489	123835	0.934681	37	61	95	156	3067	98064	53.004	98064	187126	101.142	2154	68	92.208	148	65.284	412	11.541
746	a0034K02	11,25,35,41,56,67,87	83106	146006	124527	122892	0.98687	49	21	92	176	7111	107111	73.361	107111	149331	102.277	755	9	98.944	16	79.188	15	18.333
747	a0034K12	26,34,4,41,60,78,82	83668	153356	125391	120935	0.964463	55	94	78	212	1504	81891	53.399	81891	141424	92.219	7136	110	74.722	219	165.557	195	12.862
748	a0034M22	17,2,36,46,60,78,87	83510	149489	99393	98974	0.995784	61	50	76	469	2037	21531	14.403	29476	101860	68.139	5390	105	64.976	122	424.262	15	39.8
749	a0034N02	26,33,4,51,54,68,80	82486	168485	153129	152625	0.996709	55	51	84	241	3073	82169	48.769	82169	156754	93.037	4717	87	80.788	348	77.805	150	35.293
750	a0034O24	1,26,32,45,65,66,87	82992	172180	143470	142829	0.995532	55	31	84	459	4700	100496	58.367	100496	145719	84.632	4766	54	74.585	83	521.12	35	14.457
751	a0034P06	10,19,39,44,60,74,86	82628	112698	126242	126197	0.999644	73	63	58	1235	2001	4353	3.863	10224	126084	111.878	1616	161	12.785	101	428.554	133	413.571
752	a0035A07	14,38,5,51,53,70,89	83550	159041	138989	137651	0.990373	31	30	98	215	4958	84807	53.324	84807	148764	93.538	313	33	91.95	143	86.524	38	11.316
753	a0035A18	11,24,30,42,60,71,88	82888	166525	175068	174805	0.998498	61	37	76	507	4244	56026	33.644	58155	157062	94.317	3328	62	92.16	72	180.292	2	37.5
754	a0035A24	22,28,52,55,76,8,89	83300	176393	176598	176541	0.999677	79	61	52	1388	3455	8235	4.669	26323	210811	119.512	1829	166	17.267	98	580.388	160	556.606
755	a0035B10	23,39,44,64,73,84,9	82550	141753	192442	192405	0.999808	79	42	54	1758	4924	20728	14.623	60763	206839	145.915	1000	108	28.728	76	245.447	160	514.85
756	a0035C04	10,14,36,50,56,67,83	82674	152549	148729	148359	0.997512	55	39	83	534	3397	16963	11.12	27310	132490	86.851	5826	81	81.829	119	229.689	21	18.429
757	a0035C09	15,32,4,42,58,67,82	82798	169955	183947	183869	0.999576	49	45	87	955	3141	18745	11.029	33485	141382	83.188	3484	68	80.63	132	248.682	5	18.8
758	a0035D04	25,32,4,51,56,73,89	82530	177851	199924	199786	0.99931	67	69	67	1607	3079	5762	3.24	28764	212487	119.475	4453	260	52.277	271	128.668	247	202.457
759	a0035E01	24,38,50,60,68,8,87	82460	140891	121125	117401	0.969255	43	35	92	320	3775	33376	23.689	33555	132133	93.784	2473	57	88.174	119	120.58	162	14.278
760	a0035E04	11,22,37,43,53,67,85	82828	164098	77914	72106	0.925456	55	104	82	181	1345	30799	18.769	48332	139940	85.278	7370	155	75.385	381	87.152	672	10.695
761	a0035E19	1,25,31,45,54,71,83	82810	156020	168662	168257	0.997599	49	5	93	13962	31184	69512	44.553	72241	155921	99.937	2131	18	97.481	23	162.652	8	23.625
762	a0035F01	14,2,33,46,53,67,88	82580	161021	172699	172450	0.998558	61	19	76	1263	7793	43616	27.087	63904	148079	91.963	5142	63	87.297	126	150.921	86	16.733
763	a0035F05	16,31,52,53,7,73,86	82720	143374	82077	81657	0.994883	31	42	92	362	1734	18319	12.777	24215	72850	50.811	1922	70	49.235	295	243.329	39	25.692
764	a0035G09	10,16,32,45,55,75,79	82792	172150	172847	172638	0.998791	61	29	76	568	5489	50729	29.468	58839	159197	92.476	3996	60	90.169	71	237.535	1	59
765	a0035G11	2,21,34,41,55,76,91	82462	146648	95897	95847	0.999479	73	24	60	1166	5082	17792	12.132	52606	121968	83.171	815	62	17.667	45	1626.89	60	792.15
766	a0035G13	13,20,34,42,57,66,82	82930	154642	155973	154893	0.993076	61	16	77	273	9542	78921	51.035	78921	152674	98.727	2848	30	95.846	30	212.233	1	57
767	a0035G18	10,20,35,42,54,71,80	81872	164857	175602	175145	0.997398	61	15	76	3595	10659	38808	23.54	58962	159897	96.991	4757	53	93.67	61	168.082	21	8.714
768	a0035G19	13,22,37,45,59,66,79	82782	164923	125420	120208	0.958444	61	39	76	216	4171	120035	72.782	120035	162705	98.655	2705	67	92.643	99	91.414	235	13.123
769	a0035H17	19,36,43,5,53,66,82	82508	127837	128379	125949	0.981072	55	36	83	188	3381	88693	69.38	88693	121716	95.212	3545	65	86.492	158	96.873	130	15.092
770	a0035I04	1,20,38,42,58,73,87	82702	140876	104024	103805	0.997895	31	15	97	840	5943	24995	17.743	29009	89147	63.28	1154	26	60.913	218	248.427	42	21.595
771	a0035I13	1,24,32,51,55,70,83	83238	165163	16214	16153	0.996238	73	7	59	1199	2862	12646	7.657	12646	20038	12.132	112	18	5.068	26	5799.35	12	500.833
772	a0035J01	1,25,38,40,57,76,84	82570	165963	185935	185809	0.999322	55	35	82	960	4376	84159	50.709	84159	153168	92.29	3493	62	89.68	100	168.82	3	81.667
773	a0035K09	12,24,33,52,55,68,91	82466	156273	127107	125498	0.987341	55	46	83	198	3151	104944	67.154	104944	144990	92.78	3389	63	87.305	95	196.526	131	8.924
774	a0035K19	13,18,37,44,65,74,84	81496	173541	161353	160801	0.996579	55	28	85	511	6041	48574	27.99	57938	169172	97.482	7013	67	90.543	104	143.904	32	45.156
775	a0035M24	22,30,4,41,55,72,79	82168	161003	85898	85183	0.991676	61	93	71	252	1032	4652	2.889	15250	96045	59.654	8932	190	54.385	388	186.461	49	22.347
776	a0035P09	11,21,38,49,54,66,85	82238	160768	131051	126514	0.96538	49	67	87	272	1860	18000	11.196	26450	124682	77.554	4171	90	71.177	187	236.524	128	16.469
777	a0036A22	1,21,36,46,64,77,85	82712	146205	149478	149438	0.999732	73	60	59	1113	2791	6801	4.652	17676	167487	114.556	2360	162	18.712	111	453.55	149	459.752
778	a0036B14	20,37,45,57,7,73,80	82924	166179	159157	158858	0.998121	31	15	98	307	10629	55154	33.19	67081	159447	95.949	2189	39	95.041	141	57.553	9	13.889
779	a0036C01	22,38,42,60,66,7,86	82620	145075	85104	81007	0.951859	31	54	98	136	2747	100210	69.075	100210	148374	102.274	1655	41	92.649	223	38.233	163	13.123
780	a0036C12	22,38,41,57,6,73,89	83064	145248	93706	87877	0.937795	61	47	73	203	3052	53949	37.143	55444	143455	98.766	5096	83	86.527	126	132.008	249	11.791
781	a0036D05	24,32,44,60,67,7,91	82380	190233	128571	125846	0.978805	25	36	99	167	5161	65862	34.622	67311	185815	97.678	2527	55	93.146	222	54.351	106	9.17
782	a0036E02	11,26,34,48,55,68,87	82122	145931	85264	77094	0.90418	43	63	90	178	2193	37669	25.813	43372	138219	94.715	2393	89	84.025	270	66.919	361	14.529
783	a0036E16	11,26,29,46,64,70,90	82764	143013	99881	95140	0.952534	37	49	95	168	2922	55349	38.702	70874	143210	100.138	1487	51	93.04	133	57.128	183	12.869
784	a0036E17	17,3,30,42,53,76,85	82958	142890	133327	130324	0.977476	61	21	76	259	6946	101682	71.161	101682	145868	102.084	3977	40	89.983	84	152.702	88	16.886
785	a0036E19	23,38,5,50,59,78,81	83144	174532	171915	171282	0.996318	31	55	97	321	2893	33586	19.243	69457	159140	91.181	1951	77	89.007	276	64.308	79	18.203
786	a0036F16	13,24,32,50,65,77,86	83366	163223	63223	59678	0.943929	55	126	71	204	667	2200	1.348	9276	84050	51.494	8212	252	45.313	642	128.354	396	17.321
787	a0036H04	22,29,41,58,67,7,81	82444	164090	127091	125100	0.984334	43	34	92	463	4300	40719	24.815	48866	146224	89.112	1478	58	83.951	60	342.7	246	23.467
788	a0036H06	10,26,31,51,60,71,84	82758	178542	99603	96201	0.965844	37	55	91	297	1879	8247	4.619	18394	103363	57.893	1863	88	56.096	383	197.274	197	14.371
789	a0036I04	26,28,5,50,53,76,80	82960	152203	137372	136721	0.995261	61	40	76	919	3326	32979	21.668	33860	133059	87.422	5568	98	83.877	110	215.445	25	33.64
790	a0036I19	25,36,41,53,72,8,85	83540	165775	133828	131432	0.982096	61	40	76	207	3916	51837	31.269	54416	156654	94.498	4300	69	89.428	80	201.55	84	16.69
791	a0036J15	11,23,37,40,58,78,87	82866	161814	181745	181628	0.999356	43	32	92	1117	4611	39196	24.223	39823	147557	91.189	1530	52	89.327	123	132.154	17	59.765
792	a0036M07	18,30,42,54,6,66,91	82908	162376	130300	129642	0.99495	37	43	91	592	2746	12395	7.634	23567	118081	72.721	4204	81	69.394	375	130.579	25	29.16
793	a0036N20	13,24,36,49,63,78,81	82480	175255	141632	140565	0.992466	55	41	84	561	3865	23267	13.276	36378	158503	90.441	8071	127	86.004	231	98.017	53	35.585
794	a0036N21	12,22,39,50,55,67,86	82786	176174	159316	158695	0.996102	31	17	99	178	10303	99405	56.424	99405	175162	99.426	2005	27	97.42	67	64.269	11	21.727
795	a0036O15	22,28,3,47,53,72,91	82346	166286	177838	177602	0.998673	55	40	82	1750	3463	11076	6.661	36802	138555	83.323	7339	105	78.913	164	210.933	14	33.714
796	a0036P19	24,3,31,50,55,72,88	82372	157295	170588	170506	0.999519	55	22	83	2264	5961	20518	13.044	46073	131151	83.379	3569	47	80.624	64	475.953	1	17
797	a0037D03	12,24,29,40,57,67,83	83358	176332	158349	156814	0.990306	61	15	77	492	11391	41193	23.361	60036	170879	96.908	2809	32	94.504	34	281.706	12	9.417
798	a0037F07	13,16,36,47,62,68,91	83456	109526	115338	115309	0.999749	49	30	86	523	2632	8410	7.679	37485	78983	72.113	1066	39	70.882	90	352.767	5	28.6
799	a0037F08	25,34,49,57,71,9,91	82428	152802	153683	153432	0.998367	61	40	75	634	3452	71146	46.561	71146	138085	90.369	6548	76	81.751	101	273.495	10	26.2
800	a0037F19	19,38,52,61,78,8,90	82288	157723	134084	131707	0.982272	43	26	94	417	5541	27720	17.575	36978	144072	91.345	1939	41	88.094	121	148.884	32	23.875
801	a0037F21	16,3,34,44,59,66,91	82934	154615	155106	154896	0.998646	49	18	91	807	7818	32207	20.83	40181	140734	91.022	1706	36	89.966	61	241.77	12	63.833
802	a0037I14	11,20,34,40,64,67,88	82772	168556	150715	150580	0.999104	61	30	74	724	4611	46760	27.742	54226	138338	82.072	6187	72	77.892	97	383.907	2	12.5
803	a0037I17	13,25,39,42,60,67,89	82964	150328	109279	108716	0.994848	61	27	76	609	3520	17097	11.373	42728	95043	63.224	2605	52	61.047	59	986.559	9	38.889
804	a0037J17	13,22,33,46,61,78,84	82912	149880	130767	129668	0.991596	55	47	83	871	2839	11780	7.86	18959	133440	89.031	10726	127	80.324	164	179.732	2	7
805	a0037O08	13,16,30,42,65,73,79	82916	158221	140935	139903	0.992677	31	39	98	222	3452	68552	43.327	68552	134651	85.103	1535	49	82.557	143	191.79	18	9.556
806	a0037O09	13,19,28,40,55,73,81	83670	184257	200443	200083	0.998204	49	29	90	663	5878	133844	72.64	133844	170486	92.526	829	36	91.318	64	243.266	52	8.25
807	a0037O10	25,35,52,63,68,80,9	82828	160629	153332	153179	0.999002	43	37	92	864	3432	71734	44.658	71734	127016	79.074	902	48	77.961	115	301.322	12	62.417
808	a0038A03	25,38,47,65,66,8,89	83058	179235	155682	155346	0.997842	43	34	92	539	4313	22260	12.419	28275	146645	81.817	1979	61	81.015	289	111.965	85	19.635
809	a0038B02	1,15,39,47,65,67,79	82766	139252	88837	86154	0.969799	25	61	99	163	2121	28597	20.536	43610	129401	92.926	2009	57	86.808	172	99.209	106	12.321
810	a0038B08	13,22,27,41,64,70,85	82032	171615	157601	157568	0.999791	37	17	95	1966	7145	25856	15.066	54970	121469	70.78	1351	25	69.891	101	511.248	1	35
811	a0038B13	2,26,27,44,64,74,87	83400	174507	157740	156087	0.989521	61	19	77	1890	8552	33572	19.238	67895	162503	93.121	2501	47	95.866	61	111.295	16	26.562
812	a0038B16	12,15,35,46,61,67,90	83000	190739	146093	141023	0.965296	55	80	85	179	2493	50173	26.305	57963	199479	104.582	4415	93	85.061	425	53.882	348	16.075
813	a0038B17	23,34,41,57,69,8,90	82580	141534	136248	135187	0.992213	61	32	75	616	3544	16247	11.479	51536	113414	80.132	4477	66	75.329	83	405.217	34	37.794
814	a0038D05	21,31,50,65,7,76,83	82162	150196	150053	143608	0.957049	49	37	90	177	4028	52492	34.949	62596	149040	99.23	1646	47	92.265	105	89.99	130	16.685
815	a0038D10	11,26,39,50,59,66,84	82552	157825	70161	57027	0.812802	25	123	95	148	1038	13785	8.734	52447	127675	80.897	4104	169	58.496	860	70.264	535	9.488
816	a0038E21	18,31,44,5,57,70,83	82572	150184	133308	132758	0.995874	61	18	77	1174	8083	36699	24.436	42407	145502	96.882	3489	57	92.259	245	36.204	130	21.2
817	a0038F08	21,28,5,52,54,73,83	83356	159037	146850	145566	0.991256	61	23	77	581	6646	37877	23.816	53078	152859	96.115	3525	55	92.46	83	136.337	46	14.696
818	a0038G21	21,36,40,59,67,8,90	82204	186739	141958	140234	0.987856	61	51	76	872	3110	13038	6.982	26696	158638	84.952	11251	136	78.294	170	238.194	1	41
819	a0038H17	15,27,45,56,73,83,9	82740	150395	165798	165260	0.996755	61	20	76	1737	7290	52078	34.627	60428	145816	96.955	1779	41	94.808	68	108.824	6	68.167
820	a0038I16	15,29,50,65,74,8,90	82690	140532	109175	104025	0.952828	37	56	94	161	2276	45765	32.566	57137	127476	90.71	1828	62	82.427	126	170.341	228	14.175
821	a0038K20	24,3,30,47,62,75,86	82228	177234	119577	117898	0.985959	61	25	75	498	5795	54074	30.51	66009	144895	81.754	2340	55	79.974	79	435.405	84	13.036
822	a0038K22	18,31,46,63,69,7,90	83004	183971	163233	163001	0.998579	61	64	74	914	2144	6637	3.608	24966	137277	74.619	7531	130	69.515	278	194.975	9	209
823	a0038L03	24,27,3,51,57,71,80	82672	149590	150545	150063	0.996798	25	10	99	2936	14796	58348	39.005	63201	147969	98.916	1275	32	96.829	234	12.658	24	74.208
824	a0038L06	23,29,4,48,54,73,79	82346	158267	139394	138944	0.996772	61	27	75	1391	4918	26696	16.868	31482	132786	83.9	6064	79	78.845	124	263.105	20	42.8
825	a0038L08	21,33,42,6,61,77,90	82590	134954	128477	127190	0.989983	73	22	60	1377	9832	114110	84.555	114110	216314	160.287	804	73	21	49	303.816	97	945.629
826	a0038N17	19,37,47,6,62,69,81	82598	147221	92478	86809	0.938699	55	101	81	214	1210	6624	4.499	17168	122220	83.018	8639	166	66.999	384	110.557	308	19.906
827	a0038O08	26,3,35,43,63,69,87	83326	161301	99726	94565	0.948248	37	64	94	154	2461	81537	50.55	81537	157559	97.68	1446	56	90.077	116	111.905	290	10.431
828	a0038O10	17,31,4,46,62,66,84	82456	141539	133655	133334	0.997598	61	22	77	302	5935	33862	23.924	49319	130572	92.252	1388	37	90.425	36	357.111	29	24
829	a0038P21	10,23,28,51,53,73,85	82618	153403	116500	108242	0.929116	61	25	74	206	6283	39312	25.627	57048	157097	102.408	3564	48	90.66	128	92.148	150	16.887
830	a0039B08	24,32,4,41,64,75,87	82928	167121	137844	136657	0.991389	37	36	93	279	3891	85143	50.947	85143	140076	83.817	1672	52	82.577	188	151.782	11	52.909
831	a0039B13	12,21,28,46,62,76,88	82688	168642	137817	135798	0.98535	49	27	92	181	5959	56958	33.775	63040	160913	95.417	1306	36	92.704	59	181.203	86	18.756
832	a0039C03	24,37,4,43,55,73,84	82470	136272	138490	137116	0.990079	55	22	86	178	6354	94376	69.256	94376	139802	102.59	2443	33	97.23	26	88.692	125	11.752
833	a0039C11	2,26,36,45,53,73,79	82786	166242	148242	147502	0.995008	61	14	77	439	11300	123429	74.247	123429	158211	95.169	2452	35	93.686	42	249.905	0	0
834	a0039G17	10,24,27,45,65,74,85	82572	142231	123202	121304	0.984594	31	35	98	138	3879	99622	70.042	99622	135799	95.478	968	42	89.447	149	91.396	82	16.963
835	a0039G19	12,15,39,45,59,68,85	82464	143919	110577	102930	0.930845	31	91	96	136	1627	38466	26.728	47482	148091	102.899	3228	93	90.692	346	28.121	269	13.628
836	a0039H14	10,21,29,47,62,74,83	83174	171109	161668	161305	0.997755	61	16	77	826	10537	56426	32.977	56896	168600	98.534	5237	47	93.753	54	196.037	2	51.5
837	a0039H16	19,37,48,65,7,75,91	82872	165857	161274	161061	0.998679	49	21	90	893	7133	51662	31.149	71964	149801	90.319	1959	33	89.099	64	282.5	0	0
838	a0039H18	23,37,50,62,73,8,83	82990	159433	115806	112283	0.969578	25	69	98	170	2011	16340	10.249	55423	138815	87.068	2038	73	82.057	279	99.602	77	10.623
839	a0039I24	24,27,40,5,63,70,87	82940	138880	141378	140934	0.996859	73	41	60	2258	4167	10567	7.609	24403	170858	123.026	1940	128	21.226	97	414.196	193	358.679
840	a0039K07	15,33,4,45,64,77,84	82940	168454	99206	90652	0.913775	61	51	74	206	3332	35984	21.361	56678	169945	100.885	4772	72	89.985	76	179.026	276	11.83
841	a0039K14	11,25,31,42,58,66,79	82738	157456	172299	172211	0.999489	49	55	85	826	2192	11173	7.096	19332	120596	76.59	2233	79	75.379	119	323.58	9	29
842	a0039K17	11,24,27,46,55,67,82	83070	144041	160740	160572	0.998955	49	31	88	1191	4134	23850	16.558	51070	128159	88.974	2401	50	87.107	113	163.743	2	34
843	a0039L06	13,19,38,44,63,69,88	83308	172961	171968	171759	0.998785	49	40	89	848	3643	23572	13.629	53332	145758	84.272	3738	63	81.997	124	250.169	2	59
844	a0039M08	22,30,46,57,76,9,90	82532	152424	168209	168161	0.999715	55	31	82	1556	4193	10927	7.169	47533	130006	85.292	5085	69	81.136	109	256.294	85	9.612
845	a0039M09	1,16,31,46,61,76,91	83150	150653	142374	142306	0.999522	79	60	53	1155	2833	6889	4.573	29206	169997	112.84	877	132	19.167	135	382.652	125	560.96
846	a0039N08	1,22,34,50,57,68,83	82380	142260	86196	80115	0.929451	55	80	84	178	1998	133854	94.091	133854	159913	112.409	3399	46	77.898	159	181.553	270	9.541
847	a0039N15	22,29,43,64,66,88,9	82940	150228	176782	176541	0.998637	55	1	86	150701	150701	150701	100.315	150701	150701	100.315	862	8	99.671	11	44.909	0	0
848	a0039N21	25,3,30,44,54,73,88	82846	151665	143198	142656	0.996215	31	16	98	4236	8587	30398	20.043	52539	137399	90.594	1586	39	88.895	120	130.7	51	22.725
849	a0039O03	18,33,40,65,69,8,91	83070	109977	122132	121885	0.997978	61	35	71	963	2251	5593	5.086	15342	78793	71.645	5357	72	65.907	100	374.6	1	34
850	a0040A10	23,32,4,44,59,77,85	82058	144289	96755	96585	0.998243	73	83	53	874	1428	2485	1.722	6251	118570	82.175	2483	213	12.453	187	412.979	197	249.203
851	a0040B17	11,16,31,43,65,71,87	82314	144696	146878	145771	0.992463	55	23	84	290	5931	95445	65.962	95445	136413	94.276	2514	36	82.27	109	225.826	48	21.646
852	a0040B22	23,36,4,43,57,78,80	82204	159004	100681	95760	0.951123	43	33	93	187	4468	41762	26.265	51257	147449	92.733	1451	34	90.022	153	99.503	49	13.082
853	a0040C08	24,28,44,59,6,73,86	82628	183848	187854	187746	0.999425	43	26	91	2989	6147	17315	9.418	46237	159831	86.936	3508	56	84.858	139	198.453	11	23.091
854	a0040C14	25,37,43,56,7,76,90	83464	168720	113732	111879	0.983707	61	73	75	327	1837	15969	9.465	19297	134171	79.523	10767	164	72.799	207	217.87	85	9.341
855	a0040C15	2,25,27,47,59,76,85	83148	148867	131289	131200	0.999322	49	45	83	664	2141	7297	4.902	25140	96380	64.742	2628	65	62.555	140	396.45	5	48
856	a0040C19	18,36,47,6,64,74,90	83014	175892	90802	83855	0.923493	31	98	96	134	1656	51187	29.101	52043	162372	92.313	2022	76	83.327	188	143.09	189	12.831
857	a0040D10	19,33,4,46,58,69,79	82690	153528	125236	119712	0.955891	37	62	94	242	2277	26900	17.521	44077	141202	91.971	5914	100	84.039	284	75.394	226	13.681
858	a0040E01	17,33,41,54,6,72,82	83132	168577	121437	117349	0.966336	31	72	98	141	2330	118315	70.185	118315	167811	99.546	3002	63	88.781	169	104.805	143	8.399
859	a0040E12	26,28,52,59,7,75,87	82704	147657	145876	145183	0.995249	73	27	61	3195	7828	35632	24.132	37517	211380	143.156	1704	98	42.219	107	115.43	138	528.739
860	a0040F08	2,21,31,45,63,72,85	83278	146367	62946	60470	0.960665	25	87	87	258	686	2374	1.622	5819	59752	40.823	3805	205	47.878	1092	67.608	153	16.092
861	a0040F12	13,26,30,51,63,66,86	83142	181909	163738	161393	0.985678	25	42	98	446	4146	126029	69.281	126029	174154	95.737	1997	67	86.096	222	108.959	46	24
862	a0040F15	22,31,4,44,61,69,81	82368	160801	136548	134852	0.987579	49	32	91	210	4774	34020	21.157	75383	152794	95.021	2740	44	90.488	88	160.909	72	15.778
863	a0040F16	21,37,40,5,56,72,88	82884	134167	139791	139623	0.998798	67	23	68	1504	6797	36368	27.107	67119	156337	116.524	851	91	65.383	76	344.671	84	241.06
864	a0040G06	25,38,4,43,53,68,88	82602	161401	75257	67130	0.89201	37	105	87	167	1060	12552	7.777	21098	111365	68.999	3815	159	58.321	406	147.687	604	12.101
865	a0040G11	14,36,47,60,7,75,79	82870	148999	145306	143294	0.986153	37	41	94	177	3477	29042	19.491	58668	142559	95.678	2528	63	90.248	155	78.845	110	20.991
866	a0040G17	11,23,35,47,59,71,83	82670	157719	148042	147686	0.997595	43	23	92	404	5878	34267	21.727	39805	135213	85.73	1518	36	83.9	131	191.466	14	22.214
867	a0040H04	23,27,4,42,55,66,88	82630	146638	110998	109044	0.982396	55	54	85	196	2489	87737	59.832	87737	134407	91.659	3618	78	86.452	135	136.667	84	16.857
868	a0040H15	19,34,52,60,7,71,85	83178	168312	106877	104594	0.978639	67	71	63	636	1553	5178	3.076	14118	110267	65.513	3605	332	37.447	791	89.466	470	73.438
869	a0040I18	11,23,28,52,56,66,82	83464	168964	125907	124616	0.989746	61	21	77	263	7406	80322	47.538	80322	155530	92.049	2331	34	92.008	42	313	11	32.455
870	a0040I22	19,31,43,55,67,7,79	83816	134273	111828	106083	0.948626	61	38	75	253	3614	30387	22.631	50330	137364	102.302	6029	75	87.449	102	123.382	277	15.408
871	a0040J09	25,32,41,65,7,78,80	83082	152948	105917	105028	0.991607	31	34	97	138	4287	94559	61.824	94559	145785	95.317	1929	56	91.995	154	69.305	54	29.074
872	a0040L11	16,3,39,46,63,77,88	82838	166984	159925	159562	0.99773	61	17	77	415	9680	70006	41.924	73873	164565	98.551	1322	28	97.514	29	143.138	0	0
873	a0040M05	19,2,32,41,59,73,83	82386	153115	136673	136666	0.999949	73	56	60	1573	3002	4995	3.262	34545	168130	109.806	2018	149	9.012	97	653.443	154	493.065
874	a0040M10	2,26,29,50,63,68,91	83008	162677	129531	129464	0.999483	79	70	50	1063	2230	4331	2.662	25598	156159	95.993	2127	159	13.503	141	531.518	119	552.655
875	a0040N09	20,39,40,62,66,9,91	82454	150120	118980	115721	0.972609	61	46	76	235	2990	26386	17.577	57063	137547	91.625	6358	86	82.961	100	248.66	47	15.17
876	a0040O22	1,18,31,40,58,72,82	82726	141628	94057	87853	0.93404	25	77	98	151	1875	32735	23.113	44114	144410	101.964	2570	96	89.601	435	23.602	293	15.225
877	a0040P16	19,2,29,45,54,69,90	82846	170707	124583	121067	0.971778	49	60	89	185	2692	42636	24.976	48634	161570	94.648	4922	76	84.618	159	150.031	142	16.93
878	a0041A08	2,23,28,43,55,77,83	83330	166680	133823	130603	0.975938	55	39	85	174	4495	167691	100.607	167691	175320	105.184	2412	26	94.587	106	63.179	174	13.368
879	a0041B04	19,31,41,5,62,68,85	82708	143093	112681	110083	0.976944	61	26	76	211	5481	47945	33.506	56827	142507	99.59	5287	73	91.32	76	127.789	131	20.672
880	a0041B08	12,17,34,50,65,66,79	82976	169196	137960	137783	0.998717	61	5	77	1360	23492	112725	66.624	112725	117462	69.424	1686	15	65.955	23	2498.57	2	67.5
881	a0041C04	18,3,31,42,64,71,89	83280	157377	147669	147305	0.997535	73	58	60	1822	3254	5468	3.474	18853	188782	119.955	2545	170	14.585	101	527.218	146	555.986
882	a0041C21	19,2,31,51,53,76,81	82500	174034	109163	107635	0.986003	49	66	85	242	2103	22675	13.029	57568	138861	79.79	4095	131	72.625	327	125.78	207	31.454
883	a0041E17	19,28,47,63,7,76,86	83634	145943	151766	150999	0.994946	55	24	85	183	6174	78637	53.882	78637	148194	101.542	2713	26	94.159	25	315.44	20	31.9
884	a0041G09	24,3,36,52,59,70,85	82982	175070	78308	74829	0.955573	55	102	84	182	1588	87744	50.119	87744	162010	92.54	2349	111	85.107	140	164.179	227	13.608
885	a0041G13	15,38,4,47,55,75,81	83334	167678	132134	130396	0.986847	61	12	76	5309	14002	89108	53.142	89108	168033	100.212	1009	24	98.461	21	80.952	48	18.354
886	a0041H13	16,37,46,56,67,79,9	83646	179300	168864	168552	0.998152	61	22	77	970	7765	31938	17.813	70462	170839	95.281	3443	53	93.362	58	201.828	9	21.778
887	a0041H21	21,33,41,5,58,71,80	82892	141791	111579	108534	0.97271	37	28	96	152	5165	61967	43.703	62092	144631	102.003	1033	23	98.067	37	48.378	66	14.409
888	a0041I10	22,3,38,51,61,68,85	82828	143649	118887	114856	0.966094	31	59	97	150	2349	69582	48.439	69582	138648	96.519	2019	55	88.849	171	83.556	158	10.956
889	a0041I14	12,23,28,40,59,72,79	83004	195259	114851	110362	0.960915	49	56	90	179	3550	33578	17.197	48114	198830	101.829	3137	61	94.963	102	68.343	219	13.082
890	a0041K05	15,27,4,40,54,69,85	82834	157329	131813	129801	0.984736	61	10	76	233	15958	155773	99.011	155773	159584	101.433	1325	17	95.389	14	467.429	55	12.909
891	a0041L06	17,35,47,53,6,66,86	83318	177608	112931	112054	0.992234	25	21	98	534	5950	31040	17.477	36590	124969	70.362	2843	42	66.285	143	412.126	49	19.306
892	a0041O15	11,18,32,40,55,77,80	82406	159532	161477	161282	0.998792	25	41	99	178	3927	93556	58.644	93556	161040	100.945	1346	42	97.37	101	32.762	36	24.639
893	a0041O19	24,35,41,55,77,8,81	82676	179962	108368	104904	0.968035	55	60	85	179	2677	46966	26.098	53001	160648	89.268	4840	75	80.824	88	366.545	172	13.099
894	a0042A18	24,37,46,64,7,78,88	83036	160640	137125	136963	0.998819	49	29	86	1688	3818	12591	7.838	26183	110738	68.936	2846	53	66.816	78	677.205	14	34.571
895	a0042A19	19,32,47,64,70,8,91	82176	167523	166584	165666	0.994489	55	49	82	627	2957	35856	21.404	42236	144902	86.497	5480	86	82.047	130	224.569	39	22.615
896	a0042A21	1,23,30,48,64,78,90	82418	176142	118326	116194	0.981982	31	58	97	154	2818	61193	34.741	75226	163494	92.819	1282	46	89.054	183	101.541	78	8.962
897	a0042B14	19,32,45,58,6,71,84	82412	165700	130978	130863	0.999122	43	18	92	1045	6023	57838	34.905	57838	108426	65.435	1014	29	64.624	98	593.99	33	12.333
898	a0042B21	23,32,47,55,69,7,89	83582	140786	141824	141608	0.998477	43	8	95	1393	15825	63613	45.184	63613	126602	89.925	890	16	89.38	24	622.958	0	0
899	a0042C12	12,17,39,52,56,77,89	83068	180128	90694	90412	0.996891	43	50	84	452	1432	3869	2.148	27050	71609	39.755	2659	79	39.062	206	531.646	13	19
900	a0042E13	21,35,48,6,60,71,81	83214	170409	157221	157028	0.998772	61	53	74	648	2676	24337	14.282	47607	141831	83.23	6542	114	79.252	158	221.127	15	27.867
901	a0042F08	12,17,30,51,54,78,84	82478	167053	133558	133249	0.997686	55	33	84	556	4310	21788	13.043	54110	142240	85.147	4248	73	81.652	135	224.237	9	42.111
902	a0042F15	26,35,47,62,67,7,88	82188	162959	130838	130690	0.998869	31	30	97	797	4349	86215	52.906	86215	130471	80.064	1613	49	78.866	242	139.773	46	13.37
903	a0042G07	12,23,32,52,57,73,87	82658	168281	165440	164529	0.994493	49	26	91	969	6142	42584	25.305	45859	159705	94.904	2668	50	91.002	80	179.3	39	20.462
904	a0042G20	1,23,35,50,55,76,87	83160	180535	112023	108416	0.967801	49	70	90	187	2377	44582	24.694	46735	166424	92.184	2775	74	86.542	110	208.082	125	11.256
905	a0042H19	13,19,36,51,64,75,84	83298	147339	147070	146784	0.998055	37	16	96	677	8332	47754	32.411	60534	133315	90.482	1061	32	88.924	148	104.601	9	93.222
906	a0042I04	26,27,48,6,63,72,88	82736	155190	131773	129418	0.982128	61	10	76	442	15739	53246	34.31	70778	157392	101.419	1859	27	98.747	27	42.815	71	11.113
907	a0042I11	1,15,27,50,58,77,81	82712	171833	115676	115676	1	79	64	52	1282	2002	3265	1.9	9473	128158	74.583	1217	142	10.007	108	925.898	120	455.333
908	a0042I15	15,37,45,5,65,71,89	83142	158753	124464	120865	0.971084	61	27	74	699	5694	46409	29.233	48010	153746	96.846	5710	74	90.747	105	131.429	44	20.205
909	a0042I18	19,35,41,6,63,75,90	82858	146367	133560	133305	0.998091	73	31	60	862	6188	30502	20.839	54020	191840	131.068	481	73	36.937	40	602.825	51	1337.06
910	a0042I22	17,3,37,50,56,68,86	82990	146661	101564	97638	0.961345	61	44	75	264	3203	27689	18.88	57511	140936	96.096	5201	87	88.608	91	154.286	164	16.268
911	a0042K09	18,2,32,44,54,75,81	82248	145689	96488	88030	0.912341	49	91	85	177	1414	79684	54.695	79684	128696	88.336	4751	91	62.147	293	173.495	376	11.471
912	a0042M13	14,29,41,63,69,85,9	82812	188363	144339	141290	0.978876	25	42	99	152	4253	55688	29.564	84441	178652	94.845	657	46	92.261	180	75.472	92	10.793
913	a0042M15	18,29,42,57,74,80,9	83360	176151	181106	180512	0.99672	61	12	77	328	14544	87548	49.701	87548	174536	99.083	2294	23	94.577	23	411.304	10	9.2
914	a0042N09	23,35,42,57,6,67,85	82182	175092	198265	198206	0.999702	67	58	67	1799	3214	8408	4.802	22260	186412	106.465	3235	238	43.863	230	219.687	244	195.754
915	a0042O20	12,21,29,49,55,73,90	82262	167435	129599	126973	0.979737	49	47	91	182	3362	79808	47.665	79808	158054	94.397	2079	54	85.059	156	146.321	147	14.905
916	a0042O22	1,15,30,46,63,68,87	82792	145896	145456	145372	0.999423	79	39	54	2154	4640	13402	9.186	21507	180968	124.039	713	92	20.24	82	502.098	76	989.395
917	a0042P24	2,20,30,45,65,77,81	82882	166303	201024	200916	0.999463	31	27	98	1309	5928	46047	27.689	48252	160068	96.251	598	33	95.456	196	37.041	12	24.75
918	a0043A21	14,35,45,57,71,8,87	83184	158957	105224	99588	0.946438	61	58	73	254	2600	75735	47.645	75735	150838	94.892	9445	105	77.408	222	151.185	150	15.653
919	a0043B13	15,3,31,51,62,77,83	83340	199451	104750	83485	0.796993	37	84	90	204	1552	27665	13.871	38448	130372	65.365	2854	97	57.161	269	305.312	288	11.503
920	a0043C06	13,18,30,49,62,69,83	83050	140419	56266	53821	0.956546	67	123	52	420	725	1233	0.878	6169	89271	63.575	3238	469	26.06	1044	68.489	773	41.816
921	a0043F09	1,19,38,45,53,75,85	82956	117860	124527	123506	0.991801	61	19	77	436	5914	66843	56.714	66843	112371	95.343	4327	57	90.639	76	119.526	210	9.281
922	a0043F19	23,31,45,65,78,8,84	82064	166947	81130	78288	0.96497	61	59	70	359	1568	5132	3.074	11107	92519	55.418	9871	148	43.963	236	377.216	243	18.638
923	a0043G05	13,17,33,48,62,75,87	83472	148937	108738	108640	0.999099	61	46	72	590	1810	7181	4.822	14087	83271	55.91	5192	93	53.304	168	413.577	3	22.333
924	a0043G19	11,14,34,45,60,66,89	82828	159985	130948	129509	0.989011	31	37	98	151	4089	47720	29.828	57580	151323	94.586	1567	49	92.352	153	71.327	54	24.5
925	a0043G20	1,15,35,48,54,66,84	82598	159825	138007	137192	0.994095	61	29	76	1278	4963	19650	12.295	37795	143944	90.064	4303	63	87.291	107	189.047	5	16.8
926	a0043I20	15,28,48,62,70,85,9	82356	145784	63138	62824	0.995027	79	56	47	766	1303	2358	1.617	7926	72972	50.055	1130	188	11.656	186	512.699	223	149.906
927	a0043K19	17,2,33,50,55,74,81	83466	150672	73735	68588	0.930196	61	71	72	240	1596	15676	10.404	25826	113343	75.225	8260	134	66.335	170	288.471	137	12.292
928	a0043L02	25,34,4,44,55,67,80	82858	185157	131707	130076	0.987616	37	78	91	200	1723	9137	4.935	35589	134429	72.603	3076	104	68.402	306	184.359	103	20.311
929	a0043L16	18,35,43,5,55,71,91	82822	155326	140883	139165	0.987805	25	69	98	220	2082	85910	55.309	85910	143679	92.502	1378	74	89.337	242	65.955	39	15.436
930	a0043M05	10,18,33,42,58,68,85	82792	205841	128237	126394	0.985628	37	67	89	445	1953	13350	6.486	37910	130914	63.6	3871	98	60.137	252	317.389	152	13.632
931	a0043M13	16,34,47,55,6,71,82	82456	164976	141005	136199	0.965916	37	39	96	167	4330	105062	63.683	105062	168877	102.365	1373	32	93.912	82	104.463	123	12.016
932	a0043N11	26,30,47,64,68,85,9	82330	153597	129025	126465	0.980159	55	52	85	180	2918	28899	18.815	59467	151747	98.796	4168	67	90.472	70	183.229	150	12.053
933	a0043O01	12,17,29,48,61,68,82	82660	145097	78997	75981	0.961821	31	55	96	146	2195	32091	22.117	33264	120726	83.204	1157	38	77.207	124	257.839	55	20
934	a0043O05	15,31,40,5,55,76,90	82650	142477	172138	172008	0.999245	49	29	90	731	4459	21437	15.046	24815	129331	90.773	1688	46	89.277	79	187.899	19	22.842
935	a0044A06	2,20,35,47,56,75,91	82536	146592	140827	140256	0.995945	25	22	99	1499	6559	45214	30.843	48302	144310	98.443	1783	39	95.975	158	33.848	16	34.5
936	a0044B12	11,15,29,40,61,66,81	82372	138050	132250	131673	0.995637	31	30	97	219	4081	67582	48.955	67582	122441	88.693	1562	48	86.449	142	126.275	44	17.636
937	a0044B22	11,20,27,45,61,75,87	83526	168969	163268	163091	0.998916	61	32	75	1210	4372	23033	13.631	25977	139908	82.801	6000	82	79.01	116	303.888	8	27
938	a0044C14	12,26,30,50,60,73,89	83612	178295	103020	98592	0.957018	25	85	97	161	1920	23682	13.282	36373	163271	91.574	4228	119	84.382	588	43.366	177	13.266
939	a0044C24	10,20,37,48,53,78,84	82584	151767	90713	90619	0.998964	61	35	73	538	1843	5039	3.32	20984	64529	42.518	2868	59	40.502	93	970.516	4	10
940	a0044D07	14,34,5,52,55,69,81	82600	164919	167340	166874	0.997215	25	26	99	786	6127	83163	50.427	83163	159309	96.598	932	44	93.738	153	54.98	85	22.541
941	a0044F08	13,26,33,47,55,70,79	82136	148891	113215	111081	0.981151	61	45	74	750	2264	5299	3.559	11795	101914	68.449	9251	105	59.87	126	473.881	1	41
942	a0044F22	10,21,28,44,56,77,81	82490	155142	127594	127325	0.997892	49	42	83	555	2285	57666	37.17	57666	95970	61.859	3144	82	65.244	230	231.022	10	78.6
943	a0044H10	15,28,3,42,57,73,90	83082	165106	153639	152774	0.99437	43	13	95	176	12680	115691	70.071	115691	164849	99.844	619	14	98.326	18	123.611	14	38.5
944	a0044H17	14,27,3,42,59,78,86	83058	154275	145081	144104	0.993266	73	49	60	1477	4533	25356	16.436	68424	222151	143.997	1692	164	35.075	117	149.915	184	449.038
945	a0044H18	19,30,4,50,53,78,86	82050	138782	159667	159556	0.999305	61	26	75	1017	4777	25688	18.51	43219	124220	89.507	2426	45	87.511	56	306	5	39.4
946	a0044I05	1,15,28,40,64,74,83	82970	141619	132321	132006	0.997619	61	35	74	928	3026	12953	9.146	27034	105919	74.792	4601	69	70.563	136	299.757	33	27.909
947	a0044J06	2,21,38,40,53,77,86	83168	163237	95109	87216	0.917011	37	87	90	175	1570	10927	6.694	21101	136664	83.721	4322	128	71.469	414	97.58	402	15.361
948	a0044J13	18,38,43,59,73,85,9	82866	128019	124813	124378	0.996515	49	39	85	773	2520	24601	19.217	28341	98290	76.778	3631	65	73.944	110	303.236	0	0
949	a0044K02	11,15,33,52,59,67,89	83262	72119	91642	91486	0.998298	61	17	76	698	3617	32332	44.831	32332	61503	85.28	3534	38	79.401	43	345.488	0	0
950	a0044L14	16,38,47,56,7,78,87	82646	189633	114349	113386	0.991578	61	78	75	530	1741	9444	4.98	47564	135861	71.644	8167	150	66.95	176	353.864	36	10.917
951	a0044M05	18,35,4,42,65,78,81	83110	167956	102836	94589	0.919804	25	94	98	150	1797	41457	24.683	56270	168981	100.61	4671	92	79.545	476	68.578	194	8.83
952	a0044M19	13,18,27,40,57,78,90	82396	188312	148121	146426	0.988557	31	61	97	172	2866	95276	50.595	95276	174883	92.869	2010	65	89.563	161	115.901	57	17.456
953	a0044N06	22,27,4,45,63,68,86	83402	164779	129314	128316	0.992282	61	10	77	270	15994	52110	31.624	59191	159949	97.069	1688	27	95.637	38	177.895	11	39
954	a0044N19	1,20,34,43,60,72,79	82870	159960	135745	133531	0.98369	55	49	86	180	3317	64166	40.114	78460	162555	101.622	2138	54	94.742	64	94.531	229	10.31
955	a0044P16	25,31,51,59,68,7,91	83216	153336	136778	135534	0.990905	31	42	97	305	3062	73610	48.006	73610	128607	83.873	2907	72	81.336	241	115.315	31	26.677
956	a0044P19	23,33,52,54,78,85,9	83394	176577	85960	76964	0.895347	25	69	97	144	2548	44769	25.354	53303	175820	99.571	1912	78	89.207	676	22.682	253	14.723
957	a0045A07	12,26,28,44,61,66,85	83088	161633	121714	115532	0.949209	43	61	92	179	2549	18288	11.315	41005	155544	96.233	4232	81	86.936	194	93.552	158	18.772
958	a0045B09	1,22,33,47,64,71,81	82212	166498	140283	139308	0.99305	61	14	76	199	11020	113714	68.298	113714	154292	92.669	1960	30	90.394	40	399.45	2	8
959	a0045B23	16,29,48,60,78,89,9	82958	174404	151949	147493	0.970674	55	61	84	182	2797	36359	20.848	57065	170628	97.835	5057	96	85.908	245	76.465	294	19.874
960	a0045D18	11,17,29,47,58,75,85	82700	161851	183015	182711	0.998339	61	28	75	1013	5330	50090	30.948	59322	149261	92.221	4855	58	87.102	85	244.765	4	17.5
961	a0045E05	17,31,51,64,70,82,9	82826	159331	122352	121607	0.993911	67	54	67	1227	2489	7369	4.625	17862	134456	84.388	3504	198	39.516	168	379.208	194	168.366
962	a0045E17	24,32,42,5,54,68,84	82814	186127	129267	127301	0.984791	37	65	92	218	2253	39099	21.007	45692	146469	78.693	2798	80	74.782	223	205.439	104	10.817
963	a0045E21	11,23,38,43,64,75,89	82422	157105	128082	123673	0.965577	61	41	76	431	3722	23696	15.083	28993	152615	97.142	7356	99	86.449	136	135.61	115	24.757
964	a0045F15	23,3,36,42,54,72,83	82492	169107	164442	164243	0.99879	55	47	80	586	2823	25182	14.891	51217	132707	78.475	3308	73	76.155	109	365.459	17	28.765
965	a0045G02	1,16,27,47,63,75,83	83018	183153	118227	112222	0.949208	49	90	88	174	1998	101167	55.236	101167	179863	98.204	3233	72	85.996	126	178.69	298	10.513
966	a0045G06	10,22,36,52,57,77,86	82900	140884	121818	121784	0.999721	49	23	89	986	3892	13740	9.753	18943	89531	63.549	2065	43	61.717	83	642.747	21	27.952
967	a0045H07	25,38,46,62,7,73,79	82704	151140	127805	127066	0.994218	55	33	83	482	3316	35734	23.643	39420	109429	72.402	5114	67	67.797	86	563.709	6	32.167
968	a0045H09	20,37,43,5,64,74,86	82342	184784	101653	92656	0.911493	31	100	97	142	1879	31966	17.299	42674	187907	101.69	4258	98	90.02	264	55.962	382	9.602
969	a0045O08	16,2,35,46,62,70,83	82454	155029	96348	96346	0.999979	43	25	91	1563	2550	4967	3.204	9580	63769	41.134	1581	34	40.033	90	1032.97	0	0
970	a0046B06	16,37,42,5,57,69,91	82778	142553	135671	133143	0.981367	61	18	76	199	7714	99107	69.523	99107	138854	97.405	2872	30	89.433	62	237.823	27	11.778
971	a0046E14	2,25,36,48,61,75,90	82354	174213	137110	135200	0.98607	43	38	92	239	4213	38691	22.209	53619	160110	91.905	3826	78	86.602	150	139.073	117	21.197
972	a0046G03	12,14,35,49,56,69,88	82680	161161	155010	154851	0.998974	61	17	76	1528	8239	35716	22.162	59536	140073	86.915	2927	44	84.878	57	425.298	5	25.6
973	a0046H19	10,19,38,41,54,77,84	83712	160520	149664	148402	0.991568	49	32	89	191	4591	75398	46.971	75398	146920	91.528	1679	39	88.628	107	163.804	31	23.484
974	a0046I13	11,16,33,49,64,78,91	82668	159347	165019	164704	0.998091	61	14	76	1814	10985	39697	24.912	40545	153796	96.516	2389	41	94.06	39	193.026	41	47.268
975	a0046J07	19,36,46,62,71,8,86	82464	146735	113142	112970	0.99848	73	52	57	1248	2850	9075	6.185	25724	148223	101.014	2284	147	9.58	136	491.132	113	583.044
976	a0046K23	25,30,47,6,63,78,79	82876	193595	106254	96661	0.909716	61	52	73	196	3950	132080	68.225	132080	205429	106.113	8443	88	77.617	285	137.712	286	14.28
977	a0046M13	17,34,4,42,54,70,90	82530	157035	86578	84963	0.981346	49	72	80	255	1322	9146	5.824	25392	95218	60.635	4201	119	59.964	254	245.906	38	10.789
978	a0046N10	11,22,31,51,56,72,86	82392	158372	187074	186938	0.999273	79	40	54	2377	5590	19740	12.464	45377	223601	141.187	1134	93	25.738	66	408.712	83	1091.99
979	a0046N14	12,20,27,46,64,68,84	83030	154011	105161	101414	0.964369	61	34	76	369	4439	23120	15.012	31332	150953	98.014	4731	58	87.548	78	199.603	208	17.351
980	a0046P15	15,37,4,44,62,78,79	82914	140875	139788	138176	0.988468	55	27	84	308	5102	40933	29.056	49408	137757	97.787	3645	48	91.565	50	207.3	67	22.657
981	a0047B23	15,36,46,58,72,88,9	83812	168247	106581	106380	0.998114	73	45	60	1220	3581	13253	7.877	27523	161160	95.788	1893	126	13.376	81	956.136	154	443.474
982	a0047C15	13,18,29,46,56,72,81	82826	152923	91157	81962	0.89913	55	140	83	178	1218	30429	19.898	72961	170545	111.523	5527	111	81.205	194	111.794	691	10.208
983	a0047E02	21,32,40,58,7,73,85	82472	170172	88632	79724	0.899495	31	120	95	138	1129	15134	8.893	20511	135540	79.649	3969	155	66.018	599	85.75	569	11.36
984	a0047E13	18,3,37,47,61,66,88	82702	144967	128458	126819	0.987241	55	27	84	235	4834	36427	25.128	41851	130521	90.035	4287	47	83.271	60	388.883	75	12.253
985	a0047E22	2,25,38,41,60,69,81	82520	163395	118776	116178	0.978127	31	59	97	133	2647	95881	58.68	95881	156184	95.587	2621	51	89.486	146	108.479	98	13.694
986	a0047H10	11,14,37,41,65,70,82	82262	155810	147820	147795	0.999831	61	31	76	924	3190	11110	7.13	17164	98918	63.486	4578	71	60.427	97	632.959	10	26.2
987	a0047M09	12,20,34,41,54,73,85	82404	152239	141423	140434	0.993007	61	37	76	586	3562	28103	18.46	41548	131816	86.585	5478	85	82.104	117	225.41	32	27.25
988	a0047N12	13,17,27,43,65,67,88	83238	175185	158069	158024	0.999715	61	58	74	914	2244	6637	3.789	21338	130208	74.326	7712	120	68.939	224	234.804	45	40.422
989	a0047O15	25,27,5,50,55,68,89	83532	152956	98086	87048	0.887466	55	114	83	178	1521	45495	29.744	46671	173433	113.388	4722	99	88.333	279	45.427	503	10.28
990	a0048B11	11,22,32,41,62,69,88	83028	151444	170598	170445	0.999103	55	37	82	1000	3562	20848	13.766	31170	131812	87.037	4013	75	83.216	131	180.725	77	22.636
991	a0048B13	2,22,27,43,57,69,79	82976	164173	132225	131562	0.994986	61	23	77	641	6221	33563	20.444	48772	143098	87.163	4966	58	83.688	64	417.25	3	25.333
992	a0048C20	11,21,33,47,63,68,88	82746	158986	158549	158334	0.998644	49	31	90	540	4699	38791	24.399	49630	145695	91.64	2716	82	90.407	115	107.696	80	35.837
993	a0048D01	11,18,31,50,62,67,91	82850	172219	137426	134760	0.9806	25	42	99	275	3912	33740	19.591	48773	164306	95.405	1480	56	91.96	259	51.537	29	17.172
994	a0048D10	13,17,31,42,63,68,83	82790	153210	168581	168471	0.999347	79	36	54	3500	5517	11888	7.759	26551	198615	129.636	2461	104	22.031	97	397.567	88	919.227
995	a0048D11	12,22,28,43,54,74,90	82454	158596	105230	99592	0.946422	55	81	85	179	2089	59161	37.303	70906	169237	106.71	5741	75	90.964	99	115.111	288	10.188
996	a0048D23	24,36,4,40,62,76,82	82374	143208	99486	99231	0.997437	43	36	89	442	1979	10261	7.165	32605	71266	49.764	960	39	48.27	100	738.56	4	56.5
997	a0048F08	23,39,4,52,62,69,86	82014	155774	102416	96755	0.944725	43	81	90	175	1667	29157	18.718	39514	135069	86.708	2889	96	77.362	245	125.38	342	13.292
998	a0048F15	13,23,36,52,58,67,79	83360	157593	139784	135587	0.969975	43	61	91	184	2360	84980	53.924	84980	143979	91.361	2255	76	83.9	182	117.725	303	13.026
999	a0048H15	16,2,32,50,57,66,90	82818	154047	159727	159727	1	43	25	92	2200	4271	10011	6.499	19020	106782	69.318	2488	41	67.596	145	344.041	3	10.667
1000	a0048I10	14,38,52,56,6,76,86	82620	157925	168972	168689	0.998325	61	20	77	265	7933	61726	39.086	75531	158665	100.469	2433	34	96.77	47	91.106	17	48.176
1001	a0048J12	12,19,32,51,63,68,79	82756	149559	89273	82224	0.92104	31	59	97	150	2531	34436	23.025	69457	149334	99.85	2331	63	91.859	180	56.528	173	11.566
1002	a0048J14	1,19,32,40,56,67,86	82766	159053	136616	136482	0.999019	79	49	54	1096	3761	14793	9.301	30510	184322	115.887	1166	135	25.628	79	598.709	124	572.524
1003	a0048L02	12,14,29,44,59,74,89	82518	185508	149605	147918	0.988724	61	28	77	719	6285	29158	15.718	52024	175990	94.869	4427	73	88.9	174	100.557	201	15.398
1004	a0048L06	17,36,51,62,69,7,85	82770	140967	133517	133253	0.998023	55	40	80	769	2694	26786	19.002	27326	107760	76.443	6247	92	72.013	132	298.28	2	39.5
1005	a0049A11	13,22,30,50,56,74,91	82762	200823	147127	145560	0.989349	43	37	92	251	4556	35735	17.794	51741	168594	83.952	2566	64	81.148	169	214.852	83	18.675
1006	a0049B13	15,30,40,58,71,79,8	82674	192701	106461	102065	0.958708	25	56	99	157	3547	124611	64.665	124611	198676	103.101	1577	48	94.335	129	75.674	100	11.55
1007	a0049C03	10,21,38,48,64,73,88	82590	172018	95841	86132	0.898697	61	48	72	223	3844	101124	58.787	101124	184540	107.279	7570	90	88.14	152	104.092	382	11.987
1008	a0049D02	15,29,4,46,53,76,89	83088	132793	94490	93551	0.990062	61	30	76	267	3011	18598	14.005	36751	90337	68.028	3298	66	67.289	151	279.073	65	19.969
1009	a0049D03	22,30,42,5,58,78,89	82504	177282	164880	163356	0.990757	55	39	83	197	4482	120987	68.246	120987	174814	98.608	6381	61	86.055	120	199.292	99	8.152
1010	a0049E02	23,28,3,44,58,70,80	82874	139594	137935	137231	0.994896	61	21	77	1600	6574	20382	14.601	36930	138071	98.909	6699	70	91.664	77	140.87	22	35.864
1011	a0049E04	2,20,34,44,63,78,89	82868	143184	90437	86352	0.95483	55	68	83	207	1677	37112	25.919	41222	114070	79.667	3338	101	69.461	95	407.011	361	14.019
1012	a0049E18	1,14,27,40,53,66,79	83056	183828	174500	174409	0.999479	43	28	93	1925	5486	86075	46.824	86075	153620	83.567	1709	40	82.468	96	334.417	5	24.8
1013	a0049F03	17,29,43,59,7,77,84	82666	159106	109293	109076	0.998015	73	58	58	883	2877	17175	10.795	24007	166899	104.898	1885	158	21.163	194	314.119	124	520.129
1014	a0049F05	18,29,40,64,7,75,86	82390	162167	199602	199584	0.99991	73	77	59	1528	2774	5944	3.665	18722	213601	131.717	2410	196	15.561	125	355.904	204	453.162
1015	a0049F09	11,19,36,49,58,76,90	82524	169956	133226	131424	0.986474	25	70	98	252	2294	24861	14.628	34034	160615	94.504	2382	81	88.339	299	57.94	106	23.528
1016	a0049F10	1,17,30,40,60,77,91	83628	173710	167578	166724	0.994904	55	24	85	345	6793	111669	64.285	111669	163036	93.855	2781	47	88.446	59	333.915	24	15.375
1017	a0049G08	1,26,37,47,56,77,84	82902	164088	116982	112536	0.961994	55	91	84	181	1781	48532	29.577	48745	162158	98.824	7172	119	82.016	224	110.723	355	13.262
1018	a0049G09	13,24,30,44,53,70,82	83434	185531	160547	159423	0.992999	55	41	83	551	3744	21316	11.489	47340	153519	82.746	5997	84	76.527	167	258.455	13	29.769
1019	a0049G11	19,37,50,58,74,85,9	82560	150727	62539	62379	0.997442	49	33	84	415	1537	9536	6.327	16048	50732	33.658	1064	48	32.934	60	1678.85	14	25.357
1020	a0049H04	11,23,33,41,60,77,79	82376	163176	141194	140926	0.998102	73	70	59	1234	3060	10208	6.256	55002	214226	131.285	1688	189	16.125	202	218.084	197	471.122
1021	a0049H08	12,26,29,47,54,76,87	83084	186630	123401	121824	0.987221	31	61	96	341	2068	64249	34.426	64249	126208	67.625	2054	73	64.91	261	248.326	55	12.273
1022	a0049H13	25,35,50,57,69,7,86	82868	175025	176732	176604	0.999276	55	61	78	690	2205	7616	4.351	38110	134505	76.849	4276	93	74.138	151	299.026	18	6.222
1023	a0049H15	10,23,29,41,59,70,87	82644	155689	93669	86235	0.920635	61	33	73	248	4709	28211	18.12	56520	155402	99.816	4908	72	85.127	104	194.481	202	14.505
1024	a0049H19	25,39,50,58,76,8,91	82816	147890	116883	111044	0.950044	37	62	94	159	2366	40011	27.055	40454	146752	99.231	2824	97	89.391	232	47.177	326	14.552
1025	a0049H20	11,17,32,43,63,66,91	82194	145417	160567	160399	0.998954	55	23	84	640	5771	26543	18.253	43337	132755	91.293	1580	38	90.358	61	229.016	4	12.75
1026	a0049H21	10,25,30,51,62,76,80	82094	180043	124024	118316	0.953977	37	79	91	168	2036	83559	46.411	83559	160869	89.35	4441	114	81.518	293	99.573	255	16.082
1027	a0049H22	17,39,46,6,64,67,81	81634	132488	133360	132375	0.992614	49	18	90	1930	6502	24412	18.426	42517	117051	88.348	2285	38	86.706	60	291.983	2	47
1028	a0049H23	14,2,29,47,55,66,80	83196	153914	144657	143689	0.993308	55	36	81	337	3225	60681	39.425	60681	116128	75.45	2227	58	71.936	110	388.736	31	14
1029	a0049I10	20,30,51,57,74,8,89	82762	195529	102718	99967	0.973218	37	48	95	162	3573	88211	45.114	88211	171548	87.735	1752	54	84.283	127	233.48	81	13.333
1030	a0049I18	10,19,31,46,64,72,83	82832	164586	146327	144949	0.990583	49	44	87	488	3303	85767	52.111	85767	145347	88.311	3999	85	83.627	265	92.079	91	27.978
1031	a0049K15	1,17,38,51,56,66,81	82554	141017	91790	81436	0.887199	37	88	90	154	1575	75181	53.313	75181	138662	98.33	4075	75	73.234	200	173.88	201	14.766
1032	a0049N04	20,34,47,5,59,70,80	82574	159366	155697	155545	0.999024	61	12	77	1912	12497	77589	48.686	77589	149964	94.1	1931	30	92.444	35	336.229	10	27.4
1033	a0049N06	2,21,30,42,57,75,83	82860	146867	85466	83800	0.980507	61	56	72	230	1643	24168	16.456	26177	92063	62.685	3622	92	60.577	113	507.522	15	36.6
1034	a0049N07	13,22,29,47,63,77,89	82110	129783	96705	94682	0.979081	37	44	92	203	2345	12889	9.931	23454	103189	79.509	2840	70	75.472	115	267.33	43	25.349
1035	a0049P06	26,33,41,63,7,73,84	82450	146765	108707	105217	0.967895	61	17	75	254	8881	81802	55.737	81802	150985	102.875	1538	29	97.509	18	63.556	213	11.793
1036	a0049P11	19,38,51,58,7,72,80	82334	162309	96908	96577	0.996584	73	63	57	866	2248	11515	7.094	44672	141672	87.285	1510	156	14.589	105	766.562	123	472.691
1037	a0050A03	18,36,49,57,73,8,84	82446	138256	142142	141620	0.996328	37	28	93	1125	4351	21033	15.213	42533	121829	88.118	2223	46	85.451	121	159.446	33	24.909
1038	a0050A05	26,31,46,5,58,67,86	83170	140825	149665	149463	0.99865	73	10	61	4504	20530	72645	51.585	74613	205307	145.789	660	39	38.703	22	694.409	34	2089.53
1039	a0050B03	23,33,51,64,72,8,88	82904	144145	168116	167929	0.998888	55	16	85	1877	8266	78794	54.663	78794	132264	91.758	1593	38	91.53	52	215.538	22	45.5
1040	a0050B11	19,39,41,64,69,7,82	84136	141959	147166	146310	0.994183	55	15	86	182	9544	85090	59.94	85090	143166	100.85	2215	26	97.329	31	104.355	15	37.133
1041	a0050B17	22,32,50,63,7,71,87	83874	160009	147996	146430	0.989419	37	16	96	161	9930	111786	69.862	111786	158880	99.294	1048	27	96.84	86	46.593	36	29.167
1042	a0050C02	10,18,28,40,54,70,88	84240	158968	147934	146623	0.991138	61	10	77	2611	14818	81413	51.213	81413	148185	93.217	3413	30	90.657	42	353.619	0	0
1043	a0050C10	20,36,43,54,69,8,88	82450	146737	144548	144492	0.999613	37	25	95	847	4782	27998	19.08	57049	119565	81.483	1621	37	80.307	133	217.263	1	1
1044	a0050C11	13,15,30,45,60,75,90	82998	152402	126561	125020	0.987824	61	7	77	194	21695	141409	92.787	141409	151866	99.648	1608	20	92.986	56	178.375	40	17.5
1045	a0050C17	23,38,41,58,76,82,9	83318	171235	126325	123603	0.978452	61	43	75	781	3258	12526	7.315	28940	140122	81.83	9734	132	75.256	176	231.932	127	12.213
1046	a0050D17	13,24,28,51,54,76,91	83160	169131	112281	107676	0.958987	37	26	96	148	6609	168001	99.332	168001	171835	101.599	566	20	93.008	86	130.349	20	30.75
1047	a0050D18	14,30,40,5,57,68,86	83154	154114	113459	112931	0.995346	61	29	76	609	3339	17097	11.094	42261	96856	62.847	2554	51	60.786	66	912.515	2	104.5
1048	a0050D20	20,34,49,65,69,7,87	83186	142665	176003	175867	0.999227	43	40	90	1127	2907	15157	10.624	28411	116310	81.527	1929	50	79.98	138	205.761	4	41.75
1049	a0050E04	15,38,48,5,58,68,91	82554	155584	108612	107094	0.986024	37	23	96	165	5363	104892	67.418	104892	123368	79.294	640	27	76.731	49	714.327	113	10.628
1050	a0050E15	20,38,4,45,54,78,91	83258	158337	97891	91620	0.935939	37	45	94	152	3290	59350	37.483	62272	148086	93.526	1857	57	85.419	151	137.523	151	15.371
1051	a0050E24	10,25,29,48,56,66,91	82558	183221	121342	118477	0.976389	55	80	84	303	2160	34136	18.631	71974	172808	94.317	8693	147	83.734	155	168.968	236	15.305
1052	a0050F01	1,19,30,47,57,73,82	83142	138811	131310	128839	0.981182	55	45	85	179	3208	87313	62.901	87313	144361	103.998	3191	43	84.464	47	415.149	138	14.877
1053	a0050F15	11,26,28,43,58,73,88	83350	150562	111175	87381	0.785977	31	77	94	163	1638	11722	7.785	37221	126191	83.813	5434	107	61.626	417	132.993	180	12.878
1054	a0050F20	12,15,33,40,62,73,86	82448	149430	127961	127760	0.998429	55	38	83	307	3157	83958	56.186	83958	120000	80.305	1900	50	76.608	113	298.894	32	36.844
1055	a0050F22	20,38,50,56,69,89,9	82812	160172	101720	100385	0.986876	37	25	95	193	5174	21797	13.608	29329	129355	80.76	1624	38	78.511	78	433.795	55	10.618
1056	a0050G13	23,29,51,63,7,78,83	82770	150685	127000	125168	0.985575	61	13	76	190	11870	151823	100.755	151823	154310	102.406	1675	18	91.768	45	257.889	88	9.091
1057	a0050G17	12,21,31,42,54,67,81	82502	179723	102910	98925	0.961277	25	68	98	188	2168	17302	9.627	36176	147491	82.066	3722	92	74.692	271	160.292	149	13.725
1058	a0050H16	16,32,44,65,69,82,9	82658	189993	115177	114813	0.99684	61	11	76	4561	9434	22854	12.029	41463	103774	54.62	2267	36	53.226	43	2052.95	17	34.706
1059	a0050I01	11,21,32,44,57,71,86	83272	168559	140779	139305	0.98953	25	25	99	166	6707	63553	37.704	65438	167688	99.483	1810	34	96.08	114	54.053	31	14.355
1060	a0050J04	16,37,45,53,74,8,82	83244	163729	136742	134445	0.983202	55	45	85	189	3486	40251	24.584	49513	156892	95.824	4195	63	88.014	86	214.279	97	12.33
1061	a0050J06	1,22,30,51,59,67,88	82862	136423	124556	124198	0.997126	49	27	89	754	4098	25387	18.609	32207	110662	81.117	2886	52	78.847	68	419.191	2	176
1062	a0050K16	17,36,50,59,6,76,88	83178	143599	109105	105304	0.965162	43	29	93	165	4987	94031	65.482	94031	144640	100.725	1968	29	95.425	64	85.75	78	13.859
1063	a0050L08	11,14,39,47,64,77,86	82934	152569	95387	93372	0.978876	49	32	90	173	3368	77327	50.683	77327	107783	70.645	1905	26	65.732	43	1195.72	74	11.703
1064	a0050L21	20,37,44,54,6,67,83	82902	148609	167743	167565	0.998939	55	21	85	4693	6609	20502	13.796	27247	138803	93.401	3858	51	90.372	66	213.652	6	34.5
1065	a0050M03	23,33,4,47,65,74,87	82142	144783	80890	78576	0.971393	61	49	74	460	1789	7156	4.943	34233	87662	60.547	8074	121	48.629	221	324.403	72	37.278
1066	a0050M12	12,22,34,48,64,69,89	83322	165026	102210	98807	0.966706	25	58	98	392	2355	19186	11.626	33755	136628	82.792	5386	123	80.64	563	53.705	129	13.279
1067	a0050N24	14,30,41,6,60,74,83	83164	142217	92650	85917	0.927329	55	106	83	180	1442	88622	62.315	88622	152950	107.547	5626	102	83.981	120	147.133	511	10.031
1068	a0050O10	14,36,46,57,6,69,82	83348	157071	174216	173998	0.998749	43	23	92	624	6384	78424	49.929	78424	146844	93.489	1158	36	92.303	69	166.609	40	14.85
1069	a0050O16	14,38,41,62,75,8,80	83410	176489	151124	148686	0.983868	49	36	92	173	5020	101968	57.776	101968	180747	102.413	2906	36	93.005	52	211.481	39	34.564
1070	a0050P18	19,33,51,60,73,9,90	82574	148243	77168	75130	0.97359	61	81	67	463	999	2706	1.825	8298	80995	54.637	8530	180	49.219	289	252.211	87	27.483
1071	a0051A02	14,2,36,42,58,71,81	83356	114436	128237	127015	0.990471	61	13	77	292	8958	74590	65.181	74590	116464	101.772	3943	47	95.465	90	40.389	54	28.796
1072	a0051A06	11,16,35,42,63,72,82	83164	166270	109265	101772	0.931424	61	61	74	209	2537	42123	25.334	42861	154760	93.078	4266	95	79.573	110	266.3	225	20.76
1073	a0051B11	26,34,42,5,63,71,79	82638	140196	117906	115918	0.983139	61	17	76	260	7970	83029	59.224	83029	135495	96.647	3013	35	91.479	34	340.206	32	11.844
1074	a0051C04	14,39,44,55,72,8,82	82486	151307	114391	110919	0.969648	61	32	75	408	3878	16181	10.694	61357	124112	82.027	4006	80	79.31	119	252.319	88	14.545
1075	a0051D18	26,34,44,56,7,70,86	82956	140483	149120	149084	0.999759	61	25	75	888	4296	57037	40.601	57037	107418	76.463	3525	53	73.821	69	532.014	6	11.333
1076	a0051E13	25,29,4,42,64,69,83	82224	157636	135094	132729	0.982494	31	23	98	143	6816	130713	82.921	130713	156770	99.451	639	25	93.522	125	77.488	57	9.211
1077	a0051E21	11,15,31,46,60,73,85	82160	137888	126885	126605	0.997793	55	37	80	595	2783	57047	41.372	57047	102991	74.692	4407	72	69.884	119	338.647	72	17.056
1078	a0051F11	10,23,34,43,63,68,84	82786	158764	101150	92137	0.910895	43	102	86	177	1192	9240	5.82	18535	121632	76.612	5023	123	65.449	216	232.833	339	13.457
1079	a0051F14	1,25,29,52,55,77,79	83250	137916	142074	141738	0.997635	55	21	83	356	6039	39786	28.848	43035	126834	91.965	3925	56	88.424	92	168.141	13	38.154
1080	a0051G14	1,17,35,42,64,75,88	82802	148188	111143	107413	0.96644	55	85	84	183	1860	20578	13.886	30339	158113	106.698	8510	96	89.316	105	124.229	216	12.907
1081	a0051G24	17,2,34,40,61,71,83	83058	161329	169910	169840	0.999588	43	30	92	1014	4132	22157	13.734	41097	123965	76.84	1604	43	75.534	101	389.693	3	37.333
1082	a0051H05	14,33,49,5,62,72,79	82278	136118	121697	119646	0.983147	61	10	76	4998	13739	73023	53.647	73023	137391	100.935	1823	24	95.59	48	114.062	48	11
1083	a0051J05	14,35,42,5,61,66,83	82656	154390	142022	139124	0.979595	61	22	76	454	6902	47462	30.742	53679	151865	98.365	2321	42	94.303	41	170.122	148	12.304
1084	a0051K05	14,3,30,51,64,69,79	81942	172598	129653	127537	0.98368	61	16	77	195	10991	134420	77.88	134420	175862	101.891	2041	26	88.752	125	148.36	66	13.167
1085	a0051L01	13,23,27,51,56,68,87	82852	136344	160544	160027	0.99678	61	20	77	339	5598	77039	56.503	77039	111966	82.12	2198	40	80.259	42	633.476	10	31
1086	a0051L05	23,39,40,5,65,75,83	83254	140819	106668	100278	0.940094	43	42	90	255	3099	86244	61.245	86244	130165	92.434	1924	61	81.103	219	105.744	188	18.362
1087	a0051L07	25,28,40,5,61,78,91	82890	156550	119361	115015	0.963589	61	47	74	462	3123	15094	9.642	57634	146812	93.78	9569	102	76.579	182	194.571	63	19.889
1088	a0051L12	26,35,48,65,73,8,85	83132	155300	141052	138430	0.981411	61	15	76	2754	10046	30066	19.36	60617	150691	97.032	2313	36	93.897	47	184.596	62	12.935
1089	a0051L13	14,28,49,64,7,73,89	82666	166149	128445	125915	0.980303	61	27	75	799	5702	106044	63.825	106044	153975	92.673	4385	41	86.806	50	437.5	5	9.4
1090	a0051L19	13,26,32,44,62,73,90	82822	153477	130681	128176	0.980831	61	18	76	315	8261	101334	66.026	101334	148698	96.886	3019	37	90.665	87	161.506	22	12.545
1091	a0051M10	21,28,4,51,64,67,86	83304	181177	181894	181548	0.998098	31	11	99	392	16248	104101	57.458	104101	178728	98.648	972	26	97.988	136	25.89	3	41.667
1092	a0051M16	11,17,27,41,59,68,81	82622	184053	135213	135080	0.999016	37	52	90	509	2029	9289	5.047	34749	105508	57.325	720	68	56.436	224	353.973	37	24.054
1093	a0051N07	10,26,28,42,55,67,91	82544	161565	121445	117402	0.966709	25	51	98	643	2871	35321	21.862	38343	146429	90.632	3785	100	86.949	419	45.654	111	17.631
1094	a0051O20	21,36,4,49,60,69,89	82560	182302	158233	153877	0.972471	55	53	84	182	3435	53642	29.425	64575	182058	99.866	3211	56	91.497	84	162.56	169	10.923
1095	a0051P18	11,18,29,44,63,73,87	82690	154322	171991	171871	0.999302	61	18	76	1855	7973	37165	24.083	40667	143514	92.996	3374	48	90.395	57	252.754	12	34.667
1096	a0051P23	23,27,43,5,58,72,85	82938	150252	112308	83114	0.740054	61	68	73	711	1830	4279	2.848	20738	124474	82.843	14762	163	69.157	214	213.369	34	20.029
1097	a0052A16	19,3,34,48,61,73,84	82512	141799	126626	124253	0.98126	49	27	92	177	5447	129242	91.145	129242	147082	103.726	1306	24	97.401	33	54.818	176	10.659
1098	a0052A24	20,35,4,49,62,74,85	83636	151303	144737	144578	0.998901	61	42	74	949	2746	11757	7.771	25625	115370	76.251	7919	98	70.408	130	342.008	8	39
1099	a0052B17	18,32,48,53,6,73,82	83080	153385	158926	158597	0.99793	31	33	98	423	4357	51279	33.432	61932	143812	93.759	1635	49	92.118	173	67.145	26	18.231
1100	a0052C07	22,32,51,53,77,8,84	82524	138036	117014	114397	0.977635	55	49	85	179	2891	77754	56.329	77754	141705	102.658	1670	41	94.282	27	207.704	244	9.365
1101	a0052C19	21,29,4,41,57,77,88	83238	160933	175022	174989	0.999811	49	51	85	793	2453	5848	3.634	19432	125103	77.736	3664	77	75.22	156	254.968	6	17.5
1102	a0052C21	10,24,32,47,56,72,82	82710	142725	145765	145443	0.997791	55	29	83	515	4295	26222	18.372	52260	124571	87.28	3419	61	82.37	118	187.254	80	38.325
1103	a0052D24	21,35,4,46,54,72,87	82680	174655	110562	108294	0.979487	25	49	99	229	3239	90910	52.051	90910	158721	90.877	3401	92	84.112	297	88.657	93	15.258
1104	a0052E02	26,39,44,5,54,69,89	82932	141569	147707	146373	0.990969	55	13	85	198	11008	100248	70.812	100248	143116	101.093	3814	33	95.267	42	142.31	38	19.053
1105	a0052E07	18,28,50,58,7,78,84	82976	150260	78302	72418	0.924855	31	90	94	153	1376	20722	13.791	41308	123875	82.44	6159	126	72.779	358	107.316	171	14.526
1106	a0052E09	10,16,39,40,58,67,80	82506	181356	77372	72630	0.938712	55	89	83	179	2019	29372	16.196	31533	179705	99.09	4296	94	88.111	87	206.494	378	9.516
1107	a0052E10	14,39,42,6,62,73,88	83050	173897	147759	145556	0.985091	43	41	94	177	4128	112552	64.723	112552	169257	97.332	1687	60	90.163	140	108.864	169	11.036
1108	a0052E13	26,3,37,49,62,76,91	82658	156686	110177	100432	0.911551	37	86	89	191	1508	16173	10.322	27107	129703	82.779	4772	131	75.604	403	81.104	500	11.08
1109	a0052F17	19,28,46,6,60,70,89	82274	129447	96996	91521	0.943554	37	63	92	173	1932	30216	23.342	31098	121720	94.031	1832	69	84.668	194	88.021	182	15.225
1110	a0052G01	24,35,42,58,70,9,91	82730	132811	121100	119528	0.987019	43	31	92	372	4018	48673	36.648	51929	124570	93.795	1124	42	91.518	98	101.939	71	17.958
1111	a0052G17	25,29,44,57,6,68,90	83272	161752	98029	91265	0.931	55	91	83	179	1746	105519	65.235	105519	158970	98.28	6597	122	73.571	305	125.83	390	11.21
1112	a0052H06	19,39,5,52,58,70,88	81934	140876	130772	129618	0.991175	61	13	77	473	10627	79900	56.717	79900	138157	98.07	1087	25	96.233	24	194.833	44	14.341
1113	a0052I10	23,37,48,56,6,74,89	82694	165907	152366	151114	0.991783	61	28	75	470	5329	123208	74.263	123208	149238	89.953	3651	53	83.664	73	363.63	11	50.636
1114	a0052K12	16,28,44,64,75,8,90	82772	141063	154723	154199	0.996613	55	29	84	426	4602	41715	29.572	45863	133477	94.622	4078	55	90.604	74	175.338	29	9.621
1115	a0052K15	14,38,42,65,68,9,90	82806	156251	149042	147873	0.992157	55	20	86	180	7960	151839	97.176	151839	159201	101.888	3524	25	88.74	24	699.708	51	15.706
1116	a0052L10	20,36,44,57,75,85,9	82682	183762	93434	88338	0.945459	55	95	83	182	1811	87357	47.538	87357	172048	93.625	7786	118	78.038	203	181.512	344	10.203
1117	a0052M18	2,21,35,44,61,73,80	82476	148673	78685	68851	0.875021	25	69	97	155	1986	69737	46.906	69737	137080	92.202	1484	63	69.718	377	116.289	122	9.672
1118	a0052N10	1,17,31,43,53,74,80	82456	160002	166113	165856	0.998453	61	22	76	964	6504	26824	16.765	65292	143093	89.432	3489	48	86.793	67	306.597	20	29.45
1119	a0052N16	1,22,35,40,63,78,85	82678	178442	75583	66474	0.879483	43	94	84	182	1483	14794	8.291	33780	139473	78.162	4564	119	68.703	266	195.744	276	13.692
1120	a0052O12	1,26,35,41,57,70,80	82522	167880	166614	166144	0.997179	43	7	95	3351	23879	144117	85.845	144117	167154	99.568	2226	20	94.959	55	147.873	7	47.143
1121	a0052P04	23,28,4,45,61,76,90	83066	163397	163809	162780	0.993718	31	43	96	596	3269	77869	47.656	77869	140582	86.037	1812	54	82.842	252	108.044	40	20.2
1122	a0052P09	21,38,44,6,65,75,87	82638	161277	154726	154276	0.997092	61	42	75	706	3456	40517	25.123	62226	145162	90.008	5166	83	86.217	114	192.035	14	24.071
1123	a0052P13	15,2,35,49,57,72,81	83236	163926	127709	124877	0.977825	43	50	90	285	2841	22290	13.598	28087	142073	86.669	2940	81	82.768	179	146.447	128	15.891
1124	a0052P22	13,15,36,50,57,70,89	83608	159698	128827	126101	0.97884	55	49	83	189	2892	86957	54.451	86957	141744	88.758	3320	59	80.387	96	305.823	173	11.347
1125	a0053A02	16,36,43,63,70,9,90	82924	160330	140559	138396	0.984611	55	33	85	177	5042	87557	54.61	87557	166403	103.788	2086	26	98.217	21	98.762	104	7.538
1126	a0053A06	1,19,34,46,55,74,90	83488	151034	112375	103982	0.925313	55	113	83	184	1396	22213	14.707	38981	157795	104.476	7338	147	78.542	184	125.815	772	11.994
1127	a0053A07	17,32,51,6,61,75,80	82630	164561	160266	159168	0.993149	55	31	85	198	5362	64001	38.892	66958	166223	101.01	2805	42	96.001	61	92.934	50	18.22
1128	a0053A08	12,16,37,49,65,72,83	82674	176605	136895	131921	0.963666	37	70	92	163	2297	22244	12.595	33245	160844	91.076	3854	99	82.754	216	121.347	276	15.384
1129	a0053A18	20,29,49,54,70,84,9	81806	152324	139390	137698	0.987861	49	36	90	246	3909	41879	27.493	44864	140756	92.406	2193	45	88.371	85	201.376	49	12.184
1130	a0053B16	24,34,49,56,6,68,85	82378	179222	163344	162843	0.996933	31	22	98	655	7506	84794	47.312	84794	165137	92.141	924	38	91.567	138	107.399	10	29.3
1131	a0053C01	21,27,50,6,64,69,91	83210	139852	129260	126161	0.976025	61	19	76	446	7210	92307	66.003	92307	136997	97.959	2499	29	91.389	60	189.483	40	16.825
1132	a0053E09	11,23,27,49,63,69,80	82216	153561	92998	88713	0.953924	43	34	93	176	4668	110450	71.926	110450	158713	103.355	846	31	95.492	103	45.854	174	12.644
1133	a0053F23	12,24,38,41,59,66,88	83218	158708	123978	123969	0.999927	43	26	89	1659	3488	7682	4.84	26707	90713	57.157	644	32	56.842	98	698.561	3	12
1134	a0053H08	24,35,52,6,62,78,87	82230	154669	166802	166577	0.998651	49	28	90	955	4994	24419	15.788	40316	139846	90.416	1293	50	88.596	175	91.76	26	60.769
1135	a0053H11	12,24,37,51,53,69,86	82690	143456	179635	179535	0.999443	55	34	81	1665	3627	16377	11.416	34264	123339	85.977	4665	65	82.613	99	251.818	1	12
1136	a0053H14	2,23,27,40,62,67,81	82494	141602	114370	109816	0.960182	31	65	98	136	2200	94646	66.839	94646	143040	101.016	1540	55	92.297	130	63.185	200	13.47
1137	a0053H24	2,24,30,46,59,69,89	82598	166460	104859	102694	0.979353	37	31	95	174	4747	35971	21.609	65369	147172	88.413	1137	33	85.83	48	476.167	38	19.237
1138	a0053I18	13,14,28,42,56,70,84	83440	171529	95767	91273	0.953074	31	103	96	151	1450	95635	55.754	95635	149407	87.103	3526	94	75.537	264	146.746	170	18.941
1139	a0053I19	16,29,47,57,72,79,8	83288	156557	141476	138979	0.98235	37	34	96	176	4533	96503	61.641	96503	154138	98.455	1744	39	95.019	85	76.588	48	26.833
1140	a0053J08	18,34,41,6,65,67,86	82328	148379	107563	104881	0.975066	61	13	76	539	11318	136197	91.79	136197	147137	99.163	2473	32	94.414	38	207.5	36	11.222
1141	a0053K13	26,35,46,59,6,74,91	82704	152567	88353	83697	0.947302	55	68	84	178	2292	50281	32.957	52654	155907	102.189	3236	66	89.726	64	185.625	380	9.984
1142	a0053K21	21,28,41,60,7,72,90	82610	160053	129389	128146	0.990393	43	34	93	378	3649	11891	7.429	33499	124069	77.517	3864	72	73.24	202	199.163	86	30.221
1143	a0053L16	26,28,4,49,63,70,83	83176	176454	111106	110497	0.994519	49	60	82	404	1800	7173	4.065	25617	108054	61.236	3690	106	60.765	269	254.405	27	29.481
1144	a0053M09	20,35,5,50,65,67,82	82660	188120	138955	135812	0.977381	61	41	76	394	4322	37144	19.745	58923	177215	94.203	6587	86	88.621	118	169.254	174	8.247
1145	a0053N17	23,27,46,54,77,8,89	82408	166909	123271	119324	0.967981	61	63	73	405	2430	40489	24.258	40780	153119	91.738	7784	120	83.74	173	143.37	157	14.885
1146	a0053O18	12,25,31,43,61,72,89	82964	183001	117952	113935	0.965944	49	71	91	175	2625	46183	25.236	57248	186429	101.873	2591	63	94.29	73	108.74	248	10.125
1147	a0053O19	10,18,31,49,59,74,81	83406	186361	133263	132168	0.991783	31	30	98	280	5680	86799	46.576	86799	170421	91.447	1922	45	89.705	217	85.373	48	13.729
1148	a0053P04	13,14,38,46,64,66,91	83756	151520	169338	168118	0.992795	61	13	77	352	11793	81876	54.036	81876	153317	101.186	5674	54	93.941	121	63.017	97	16.031
1149	a0053P05	16,30,47,5,54,77,90	82560	170855	116289	113354	0.974761	43	38	92	172	4170	106178	62.145	106178	158466	92.749	820	40	87.722	290	61.655	126	24.587
1150	a0053P17	26,32,52,60,69,79,8	82896	151932	131284	130928	0.997288	61	22	77	202	6040	121104	79.709	121104	132898	87.472	1236	33	86.535	37	549.73	3	39.333
1151	a0054A01	19,28,4,44,54,71,82	82552	173052	104815	95318	0.909393	37	76	93	159	2292	49778	28.765	49932	174237	100.685	1288	65	91.917	184	51.049	465	9.88
1152	a0054B15	14,31,4,42,60,72,91	83250	156997	107574	104017	0.966934	43	43	91	196	3011	29604	18.856	39637	129497	82.484	1093	56	82.416	131	199.412	151	9.828
1153	a0054C12	17,30,48,58,73,80,9	82784	156538	101802	97007	0.952899	43	56	90	185	2016	23324	14.9	41362	112896	72.121	3219	92	68.171	180	261.983	225	11.858
1154	a0054F06	22,3,39,41,54,78,87	83196	146976	140755	137580	0.977443	61	27	76	269	5184	72949	49.633	72949	139976	95.237	2749	50	90.882	55	222.545	50	23.22
1155	a0054G13	17,27,50,60,7,70,80	82458	133007	147317	146878	0.99702	61	18	77	731	7180	48242	36.27	51954	129251	97.176	4471	51	93.469	67	129.657	0	0
1156	a0054G15	15,2,38,45,62,76,87	82862	153349	128533	124012	0.964826	31	64	97	147	2381	97249	63.417	97249	152403	99.383	2849	60	84.186	198	112.96	145	12.993
1157	a0054H12	17,31,48,55,6,78,91	82388	173759	112774	104813	0.929407	25	97	98	200	1576	13948	8.027	33665	152896	87.993	5201	160	78.888	498	68.61	195	12.903
1158	a0054H22	18,39,42,5,53,72,86	82136	162004	160171	159980	0.998808	49	43	89	811	3187	15655	9.663	37489	137042	84.592	2690	77	81.699	182	152.725	50	37.06
1159	a0054I08	10,17,31,52,54,76,79	83360	151325	87521	79618	0.909702	25	60	98	164	2667	81891	54.116	81891	160057	105.77	2695	47	88.139	296	56.483	125	9.832
1160	a0054I13	1,20,39,45,64,70,89	82940	170332	145988	144371	0.988924	61	15	77	234	11352	56271	33.036	66528	170284	99.972	1672	30	97.422	37	95.892	78	10.808
1161	a0054J03	10,25,38,49,58,78,83	83878	160080	184084	183759	0.998235	49	21	91	1119	7288	76801	47.977	76801	153063	95.617	1765	44	93.933	132	65.788	30	34.267
1162	a0054J07	20,32,4,40,57,70,79	82998	152000	159318	158527	0.995035	61	22	75	2468	5852	72281	47.553	72281	128747	84.702	3584	50	81.726	73	368.466	21	41.81
1163	a0054J15	11,25,30,52,65,69,90	83056	155171	157692	157630	0.999607	61	28	74	1131	4391	14280	9.203	59711	122957	79.24	5500	83	74.379	192	196.964	85	22.812
1164	a0054J23	25,32,40,6,62,72,83	82424	151152	113363	111210	0.981008	49	33	92	179	4483	43723	28.927	52325	147961	97.889	1164	27	92.664	37	244.27	157	13.064
1165	a0054K04	20,34,48,6,62,76,90	82930	159934	147570	146828	0.994972	61	20	77	283	6026	33974	21.243	49179	120527	75.36	4203	49	94.756	67	109.313	54	19.685
1166	a0054K05	2,25,34,42,62,68,86	82280	178357	190753	190643	0.999423	55	33	83	1258	4681	15544	8.715	48806	154480	86.613	7245	78	81.875	127	252.591	5	49.6
1167	a0054K20	2,21,27,46,65,71,90	82884	153584	148162	147395	0.994823	37	24	96	464	6145	33039	21.512	72803	147494	96.035	1281	33	95.793	115	52.643	29	14.069
1168	a0055B03	10,22,38,45,56,71,90	83034	161390	143276	143017	0.998192	61	42	76	1026	2883	8749	5.421	23366	121113	75.044	5263	90	80.071	113	267.124	135	14.652
1169	a0055C05	25,3,34,43,65,74,83	82932	170098	142983	141859	0.992139	37	28	96	143	5809	144792	85.123	144792	162662	95.628	710	37	93.89	183	50.836	73	14.932
1170	a0055C08	18,31,47,53,75,8,87	83024	145746	104684	99620	0.951626	61	32	74	306	4723	86240	59.171	86240	151136	103.698	4276	63	91.988	102	75.029	371	10.846
1171	a0055C11	12,15,36,49,54,77,79	82812	152507	126965	121454	0.956594	61	32	76	235	4836	85818	56.272	85818	154764	101.48	5746	68	83.455	167	134.371	191	14.618
1172	a0055C19	16,32,41,56,6,77,91	83444	141353	141363	141140	0.998423	61	29	76	715	4692	72270	51.127	72270	136070	96.263	5171	60	87.168	98	180.051	8	61.75
1173	a0055C22	26,34,46,62,69,80,9	82556	170735	115800	111888	0.966218	61	32	76	271	5129	87499	51.248	87499	164148	96.142	4024	72	91.241	88	142.83	141	16.922
1174	a0055D03	10,14,38,43,55,74,87	82590	180196	140715	138235	0.982376	49	56	88	200	2927	86273	47.877	86273	163948	90.983	4397	70	84.454	91	291.714	128	11.461
1175	a0055D06	10,16,30,52,56,68,88	83212	182956	177733	177526	0.998835	37	46	94	776	3234	25095	13.716	36830	148786	81.323	1753	66	78.892	197	188.228	47	32.723
1176	a0055D07	21,30,4,44,63,74,90	83486	174417	139014	138190	0.994073	61	31	77	547	4709	19197	11.006	39101	145983	83.698	5100	75	80.312	99	342.657	14	29.786
1177	a0055E06	23,37,49,59,67,7,86	82834	170994	169403	168472	0.994504	37	86	92	220	1629	11940	6.983	36426	140128	81.949	1190	94	79.231	220	156.386	48	23.104
1178	a0055E09	26,30,44,55,6,76,81	82440	165887	120868	117468	0.97187	61	20	75	297	8341	40587	24.467	75004	166831	100.569	4493	49	93.359	59	159.949	157	10.064
1179	a0055E13	1,20,30,44,62,71,84	82644	146762	101500	98819	0.973586	43	38	88	236	2871	75160	51.212	75160	109116	74.349	1280	41	70.148	89	477.326	117	11.359
1180	a0055E20	16,37,4,41,54,76,81	82386	159641	118656	113392	0.955636	43	61	91	188	2467	43616	27.321	62058	150506	94.278	2339	75	86.202	117	159.53	229	14.681
1181	a0055E23	16,34,49,61,70,8,89	82590	156572	90287	90077	0.997674	43	34	87	632	2088	7167	4.577	27049	71006	45.35	2690	52	43.408	153	577.863	7	27.714
1182	a0055E24	18,35,45,61,7,70,85	82516	132143	149701	149444	0.998283	67	16	68	1599	10182	44914	33.989	45512	162923	123.293	2108	76	63.242	133	182.654	75	323.733
1183	a0055F18	23,38,52,65,7,77,88	81886	160260	82149	74002	0.900827	37	100	89	165	1439	30393	18.965	49198	143935	89.813	2891	98	78.706	137	219.08	386	10.65
1184	a0055G06	19,36,44,56,6,72,79	83146	160881	134306	132369	0.985578	31	44	99	136	3746	140000	87.021	140000	164838	102.46	1714	40	94.109	139	56.856	164	9.604
1185	a0055G20	24,29,46,5,62,77,91	83118	161863	89416	85290	0.953856	31	41	98	138	4055	100687	62.205	100687	166278	102.728	1084	35	96.863	146	19.507	227	9.824
1186	a0055I11	1,24,35,47,60,74,89	83214	157984	88457	82091	0.928033	61	44	73	279	2317	22875	14.479	30578	101948	64.531	4281	143	80.582	216	104.116	330	24.815
1187	a0055J03	2,20,28,52,53,70,90	82826	146299	163373	162633	0.99547	73	31	61	2205	7325	56910	38.9	67626	227102	155.231	1112	89	38.479	59	89.153	141	601.021
1188	a0055J22	12,19,29,42,58,77,86	83164	151319	85778	85415	0.995768	37	9	97	2837	9168	46988	31.052	46988	82518	54.532	1007	25	51.857	43	1630.58	145	18.855
1189	a0055K04	18,27,3,43,53,70,81	82586	170244	104370	100629	0.964156	55	102	81	235	1433	9443	5.547	18862	146266	85.916	11811	201	72.239	288	144.375	330	17.218
1190	a0055L09	11,18,37,42,59,75,90	82678	146238	95697	89392	0.934115	49	86	90	176	1787	26866	18.371	40293	153731	105.124	3403	79	91.302	92	98.87	283	12.806
1191	a0055L10	17,29,44,62,70,8,81	83254	132872	175497	175419	0.999556	61	11	76	3401	11852	41282	31.069	50420	130377	98.122	3441	38	95.451	50	120.88	0	0
1192	a0055L12	17,27,49,57,6,77,83	82704	149694	82122	78782	0.959329	37	28	95	155	4961	41889	27.983	44497	138912	92.797	1451	31	87.968	59	278.881	135	11.533
1193	a0055L13	24,28,3,41,63,68,82	83082	160946	93918	93653	0.997178	43	30	92	729	2462	8020	4.983	24729	73879	45.903	1377	45	46.273	116	736.888	18	55.111
1194	a0055L18	13,26,34,50,61,67,81	82544	172585	162733	162555	0.998906	61	33	76	920	4534	28970	16.786	51085	149639	86.705	3561	65	84.248	77	346.857	2	238.5
1195	a0055L24	14,37,4,47,57,67,90	82230	149658	114469	109414	0.95584	43	44	92	171	3232	118072	78.895	118072	142246	95.047	2925	38	81.918	44	568.477	169	12.118
1196	a0055M14	21,38,46,58,74,8,81	83430	164976	78740	65209	0.828156	37	96	88	167	1375	17926	10.866	33758	132072	80.055	4473	129	64.614	459	114.66	357	16.104
1197	a0055M18	1,24,31,48,62,73,81	82562	149130	150821	150499	0.997865	73	35	60	2561	6350	21163	14.191	47606	222281	149.052	967	103	15.694	55	483.055	137	723.774
1198	a0055N10	13,23,38,45,57,74,83	82680	153944	113161	110163	0.973507	31	54	98	149	2827	81895	53.198	81895	152681	99.18	3588	62	90.106	193	69.031	99	19.273
1199	a0055N18	12,23,38,44,54,68,86	83348	174559	123531	122897	0.994868	61	52	73	791	2475	8421	4.824	15677	128713	73.736	10959	156	66.698	432	124.47	161	27.087
1200	a0055O05	20,28,45,58,67,8,85	82566	163471	91904	88181	0.95949	55	55	85	176	3155	67548	41.321	68295	173537	106.158	2533	46	96.669	60	42.8	241	11.942
1201	a0055O11	1,23,38,46,60,67,80	82762	163456	86371	79738	0.923203	61	80	74	779	1570	4183	2.559	15416	125624	76.855	17637	214	63.131	255	234.455	20	23.95
1202	a0055O22	24,33,4,44,57,72,89	82504	146161	119428	117309	0.982257	61	37	74	707	3206	24342	16.654	35986	118639	81.17	6081	87	74.004	118	308.195	111	14.676
1203	a0056A03	17,28,4,50,57,75,91	83066	155261	158486	158294	0.998789	31	8	99	431	19161	103958	66.957	103958	153295	98.734	568	17	97.918	54	52.926	16	23.438
1204	a0056A09	1,15,31,49,56,78,89	83212	164315	124568	120866	0.970281	55	57	85	176	2999	102156	62.171	102156	170967	104.048	4148	44	92.393	47	226.234	212	8.807
1205	a0056A10	11,15,30,43,54,76,83	83416	142023	115016	111355	0.96817	43	29	93	180	4825	24993	17.598	59873	139925	98.523	1744	33	93.866	101	74.693	48	24.312
1206	a0056A14	21,3,37,51,63,73,81	84322	184556	188126	187916	0.998884	49	35	88	1418	4608	17233	9.338	52788	161301	87.399	3399	62	85.149	120	226.667	17	12.294
1207	a0056A21	12,23,35,48,62,77,80	83452	152406	169865	169354	0.996992	55	14	84	854	10553	51464	33.768	72069	147755	96.948	2453	38	95.016	57	125.719	18	23.889
1208	a0056B01	18,31,48,56,68,84,9	82528	187960	167591	166177	0.991563	61	35	75	1482	4735	38676	20.577	48922	165734	88.175	4627	74	84.512	79	354.544	73	15.11
1209	a0056B05	15,37,47,58,7,70,83	83516	172484	169011	168811	0.998817	55	18	84	1917	8853	52197	30.262	57755	159361	92.392	3566	44	90.192	58	290.983	3	13.667
1210	a0056B08	18,39,46,65,70,87,9	83032	184327	141395	135458	0.958011	43	86	88	379	1789	7766	4.213	31281	153921	83.504	5343	125	72.991	295	152.183	306	15.984
1211	a0056C08	12,18,38,46,55,78,89	83032	135797	126077	124678	0.988904	49	23	92	176	5924	126487	93.144	126487	136261	100.342	577	17	97.189	16	190.938	73	10.438
1212	a0056C12	11,17,34,49,62,73,82	82676	148785	160909	160362	0.996601	61	26	75	1548	5396	36655	24.636	38835	140300	94.297	7191	69	86.649	82	241.671	3	16
1213	a0056C23	2,22,30,52,62,73,85	82686	141494	172227	172044	0.998937	61	22	76	1656	6097	23666	16.726	57537	134151	94.81	2419	47	93.048	61	160.393	3	17.667
1214	a0056D08	16,2,28,51,59,78,82	82166	156687	133647	131652	0.985073	55	36	85	177	4442	114657	73.176	114657	159913	102.059	2069	32	91.196	46	277.565	123	8.35
1215	a0056D12	21,34,46,57,67,7,89	83016	159736	125902	121541	0.965362	31	45	98	145	3563	81156	50.806	81156	160361	100.391	1964	54	93.773	157	44.803	127	22.929
1216	a0056D18	17,38,46,54,75,83,9	82640	171416	104853	100476	0.958256	37	86	91	180	1608	90902	53.03	90902	138310	80.687	2143	89	70.128	193	251.99	238	10.807
1217	a0056E09	10,15,28,49,65,76,82	83178	168948	102384	98081	0.957972	55	64	85	180	2687	117896	69.782	117896	172016	101.816	3679	55	81.493	65	458.185	154	9.649
1218	a0056F03	11,17,33,46,56,76,80	82846	169327	165038	164842	0.998812	61	28	76	1002	5261	16648	9.832	46508	147319	87.003	7007	85	82.458	110	267.373	13	22.538
1219	a0056F14	2,25,33,52,56,71,84	82040	175927	145279	143384	0.986956	25	38	99	364	4292	33475	19.028	57541	163096	92.707	2500	60	88.814	217	85.866	58	18.034
1220	a0056F23	1,22,29,48,53,70,86	83546	151066	112024	111634	0.996519	73	42	60	1154	3893	19696	13.038	33847	163529	108.25	2272	118	19.104	87	661.437	99	653.152
1221	a0056G18	10,24,30,41,57,78,91	83100	152851	123050	118788	0.965364	61	20	76	433	7634	109719	71.782	109719	152689	99.894	3071	46	92.325	96	87.354	116	28.845
1222	a0056I06	26,34,45,59,76,8,83	83250	167652	107219	99432	0.927373	55	104	84	180	1634	40950	24.426	44779	169969	101.382	6619	121	82.083	215	106.986	461	15.262
1223	a0056I19	13,15,28,52,61,68,86	82128	151874	92921	87915	0.946126	31	69	95	134	1630	60818	40.045	60818	112531	74.095	3209	93	59.075	373	161.185	160	12.7
1224	a0056J02	24,30,50,58,6,67,90	83174	188791	152964	152861	0.999327	55	32	82	1367	3969	26725	14.156	37021	127015	67.278	5437	74	64.316	110	612.273	4	4.75
1225	a0056K16	17,2,37,49,53,75,89	82826	152646	102610	92876	0.905136	61	16	75	236	10035	156792	102.716	156792	160572	105.192	1885	22	90.978	66	188.303	85	15.8
1226	a0056L08	15,2,32,40,65,68,88	82468	152828	147136	146984	0.998967	79	54	54	1749	3332	10348	6.771	19032	179930	117.734	1462	121	24.659	90	500.4	99	708.141
1227	a0056L22	23,29,49,5,57,66,89	82982	144398	84916	80359	0.946335	49	61	90	176	2482	115187	79.77	115187	151416	104.86	1930	40	94.222	60	106.233	168	11.72
1228	a0056L23	15,37,46,55,6,77,86	83248	175676	83516	79761	0.955039	55	108	80	229	1089	6334	3.606	9995	117661	66.976	10352	220	61.83	385	164.623	93	39.516
1229	a0056M03	1,24,38,43,65,78,82	82542	160521	157323	157068	0.998379	49	24	90	517	5726	39008	24.301	44177	137435	85.618	1037	40	83.301	65	404.477	13	39.538
1230	a0056O03	10,19,27,47,53,71,88	83030	164452	114856	110017	0.957869	31	53	97	136	2925	48450	29.461	76813	155068	94.294	2120	52	87.908	202	88.693	192	10.255
1231	a0056O10	22,27,49,62,66,8,87	83702	145436	134967	134546	0.996881	67	66	67	987	2531	14788	10.168	21993	167052	114.863	3245	203	57.805	177	131.814	415	91.653
1232	a0056O18	12,25,37,48,58,67,88	83316	144163	159299	159211	0.999448	55	34	82	1518	3507	10431	7.236	37624	119259	82.725	4950	68	79.176	98	306.122	1	20
1233	a0056P06	14,35,4,41,58,73,86	83344	149397	119330	117501	0.984673	31	50	96	155	2655	111152	74.4	111152	132796	88.888	1171	47	83.946	195	116.938	68	17.368
1234	a0056P19	22,32,48,5,57,72,80	81940	174615	120834	116060	0.960491	43	57	93	172	2873	37487	21.468	46719	163816	93.816	2754	66	87.419	143	139.692	168	11.863
1235	a0057A06	26,3,39,42,61,70,82	83352	161536	124828	124418	0.996715	49	24	87	770	4937	17442	10.798	31065	118495	73.355	2276	58	72.651	120	362.383	24	28.833
1236	a0057B02	25,3,33,40,59,77,81	82480	158074	155384	155179	0.998681	61	41	74	298	3033	24821	15.702	44009	124390	78.691	2695	70	77.288	102	348.108	2	197
1237	a0057B09	16,27,41,58,78,8,88	82788	143619	137264	136177	0.992081	55	19	86	178	7760	134337	93.537	134337	147452	102.669	1735	19	96.246	24	188.833	82	10.476
1238	a0057B21	14,30,43,53,73,8,90	82798	159113	152336	151224	0.9927	49	63	86	597	2101	22078	13.876	24920	132413	83.219	4443	108	76.911	242	132.169	273	17.407
1239	a0057C02	1,14,31,52,64,67,87	82870	168141	181707	181668	0.999785	49	39	89	1164	3426	14955	8.894	24964	133645	79.484	2229	61	77.728	114	322.439	16	43.125
1240	a0057C10	10,23,38,42,61,69,79	83104	163616	128546	127191	0.989459	55	28	85	180	5091	78914	48.231	78914	142548	87.124	4041	46	77.489	117	302.342	129	11.302
1241	a0057C16	22,36,4,46,65,67,91	83098	147717	126037	125973	0.999492	25	55	97	562	1663	6373	4.314	17207	91498	61.941	397	56	61.104	343	167.224	7	14
1242	a0057D24	25,28,42,54,7,77,85	82542	178511	120749	119197	0.987147	61	46	76	260	3305	39829	22.312	43779	152059	85.182	2564	76	84.017	107	261.009	39	15.487
1243	a0057E08	13,25,34,40,56,69,79	83446	155506	101541	95036	0.935937	37	71	94	167	2183	117975	75.865	117975	155024	99.69	2790	67	85.331	178	107.646	300	12.167
1244	a0057G07	14,2,27,41,56,72,89	81860	155094	113545	108582	0.95629	61	29	76	219	5247	85720	55.27	85720	152168	98.113	3524	39	88.882	56	279.607	108	14.676
1245	a0057I03	22,29,5,52,65,68,87	81744	134762	114856	114449	0.996456	37	17	93	225	5473	71915	53.364	71915	93046	69.045	916	30	68.821	91	460.758	4	22
1246	a0057I11	24,39,51,6,60,66,82	83440	158791	153233	151426	0.988208	61	31	75	640	4853	94203	59.325	94203	150466	94.757	5306	65	87.951	89	205.056	53	16.66
1247	a0057I21	16,30,51,53,75,9,91	83060	159562	102836	102778	0.999436	43	34	89	684	2234	6421	4.024	11106	75980	47.618	1683	48	46.336	173	493.561	5	48.4
1248	a0057K19	10,14,37,40,62,77,85	82666	169926	177117	176750	0.997928	61	22	76	1517	7085	31996	18.829	64691	155885	91.737	2873	43	89.931	80	212.4	4	29.25
1249	a0057L19	10,14,32,51,58,66,88	82670	156152	89130	75972	0.852373	55	179	79	183	966	29103	18.638	32028	173035	110.812	9467	209	80.524	264	73.973	971	11.208
1250	a0057L22	17,30,47,55,67,8,83	83032	175054	118167	110776	0.937453	37	114	89	178	1256	4969	2.839	38900	143254	81.834	5019	148	69.352	398	121.198	287	18.861
1251	a0057M22	14,34,40,58,6,75,91	82262	151046	114861	111723	0.97268	37	56	96	163	2843	125432	83.042	125432	159216	105.409	1231	58	95.237	98	27.327	206	21.922
1252	a0057N13	15,33,46,5,54,70,81	82878	175424	140419	137699	0.980629	37	29	96	171	5994	92995	53.012	92995	173829	99.091	1373	49	89.538	192	31.198	69	179.174
1253	a0057N20	17,36,52,65,75,8,82	83406	171395	79438	72840	0.916942	61	58	73	198	2895	40252	23.485	63842	167928	97.977	7635	104	85.439	113	196.54	282	9.745
1254	a0058A05	26,27,51,59,77,79,9	83176	163227	96542	93087	0.964212	55	71	84	179	2214	34025	20.845	68648	157263	96.346	2336	57	88.673	68	249.868	134	11.179
1255	a0058A11	16,31,41,59,72,80,9	83174	151250	158277	158128	0.999059	49	40	87	1017	3065	19356	12.797	41999	122621	81.072	3759	68	78.816	106	297.991	16	28.375
1256	a0058B07	25,3,31,47,60,70,90	82592	149212	103175	99333	0.962762	61	56	74	276	1918	54452	36.493	54452	107447	72.01	5973	126	68.113	216	213.079	59	26.339
1257	a0058B19	17,27,52,53,69,87,9	82642	154128	103675	99415	0.95891	61	25	75	273	5818	84955	55.12	84955	145453	94.372	3098	46	86.976	55	335.764	135	11.904
1258	a0058C01	1,26,29,49,60,75,81	83006	147069	147523	147411	0.999241	55	30	82	1017	3879	26012	17.687	38207	116384	79.136	3205	58	76.106	78	441.372	26	27.462
1259	a0058C13	12,25,35,42,59,73,84	82460	166924	135142	133413	0.987206	61	33	76	747	4413	37767	22.625	50384	145631	87.244	6533	87	85.029	115	209.009	51	18.706
1260	a0058D20	12,18,28,42,60,69,82	82640	158110	150680	149878	0.994677	61	9	77	212	17149	86182	54.508	86182	154342	97.617	1926	20	98.402	20	113.7	28	9
1261	a0058E06	22,3,33,49,57,70,88	83620	181143	170736	170615	0.999291	49	47	87	1031	2736	9322	5.146	20088	128602	70.995	3075	72	69.086	153	364.072	10	29.6
1262	a0058F07	1,17,39,41,62,76,83	83248	170344	86256	78788	0.913421	37	97	91	166	1474	22188	13.025	27115	142992	83.943	3386	116	76.636	244	147.238	298	13
1263	a0058F19	16,35,49,5,58,75,87	83242	158523	112371	111894	0.995755	55	34	83	600	3085	22816	14.393	35954	104911	66.18	3359	63	63.222	100	580.48	4	63.25
1264	a0058G07	26,38,42,6,64,78,84	82510	158233	161021	160783	0.998522	49	13	92	267	11816	72825	46.024	76439	153616	97.082	933	22	96.438	34	160.382	6	30.5
1265	a0058G17	12,25,36,45,65,70,86	82782	156270	139816	138856	0.993134	61	14	77	417	11012	89780	57.452	89780	154174	98.659	2992	40	94.645	71	95.549	80	19.812
1266	a0058H02	10,19,36,48,55,70,80	82378	115555	143567	142949	0.995695	61	12	77	1646	9357	65125	56.358	65125	112284	97.169	2025	31	94.902	45	119.244	7	75
1267	a0058K14	11,23,30,45,55,73,86	83372	92036	100556	99821	0.992691	49	22	90	178	3486	42565	46.248	42565	76699	83.336	801	20	79.883	32	569.969	26	10.615
1268	a0058K17	13,22,32,43,55,68,82	83184	186316	109694	107504	0.980035	49	64	88	223	2211	84368	45.282	84368	141544	75.97	1873	86	72.424	210	230.69	144	20.375
1269	a0058K18	21,30,46,56,6,73,84	82836	149314	103726	100262	0.966604	55	68	85	179	2233	51530	34.511	57947	151886	101.723	4580	61	86.883	102	165.324	215	12.665
1270	a0058K19	15,36,43,6,62,67,84	82630	196984	135535	127115	0.937876	25	80	98	163	2487	30567	15.518	46527	198992	101.019	3078	89	86.396	581	43.143	175	9.897
1271	a0058K23	13,26,37,46,53,71,87	83044	164641	146560	145847	0.995135	55	16	86	177	10407	52035	31.605	70639	166512	101.136	1126	25	98.661	40	29.625	61	16.705
1272	a0058L07	12,23,34,45,56,67,91	81962	189900	119443	119423	0.999833	73	64	57	1447	2476	5107	2.689	15523	158509	83.47	1863	169	11.651	138	723.986	166	408.825
1273	a0058L15	20,28,46,61,73,82,9	83332	191354	155581	150811	0.969341	49	46	91	185	4156	44616	23.316	69959	191211	99.925	4479	72	93.039	205	51.815	161	16.764
1274	a0058L18	17,35,46,5,63,73,89	82890	165865	106973	101326	0.947211	37	44	95	162	3691	49977	30.131	56784	162437	97.933	1791	52	94.04	85	99.506	129	11.07
1275	a0058M01	19,3,36,41,60,67,88	82764	160576	104252	99831	0.957593	49	62	89	178	2433	24782	15.433	36485	150870	93.956	3673	65	85.88	76	276.75	177	9.266
1276	a0058M12	13,25,32,47,57,75,88	83076	142036	134514	133772	0.994484	61	2	77	71135	71135	110245	77.618	110245	142271	100.165	1031	11	99.388	13	66.846	0	0
1277	a0058N01	19,2,33,44,65,70,85	82848	156189	144376	144255	0.999162	79	62	53	1123	2942	6557	4.198	29206	182427	116.799	936	154	13.277	129	425.395	165	488.339
1278	a0058N04	21,39,50,54,77,80,9	83076	152208	163364	163062	0.998151	49	6	93	2636	24852	135738	89.179	135738	149112	97.966	501	12	97.535	24	148.875	2	89.5
1279	a0058N13	16,2,38,42,54,74,89	82690	183038	135566	131495	0.96997	31	41	98	139	4298	160918	87.915	160918	176228	96.279	1907	33	89.245	91	211.011	46	10.5
1280	a0058N14	1,18,37,45,55,67,81	82600	173302	125372	121372	0.968095	43	32	93	174	5107	55361	31.945	77203	163450	94.315	1790	39	89.923	94	170.011	104	14.25
1281	a0058O19	24,3,33,43,54,66,79	83182	162430	181962	181743	0.998796	67	32	69	1630	6466	61255	37.712	70013	206921	127.391	2402	121	63.917	120	291.025	106	223.462
1282	a0059A16	16,38,46,53,6,72,90	82640	132754	123620	123210	0.996683	43	20	91	2949	5193	22312	16.807	30950	103871	78.243	1653	40	77.539	73	401.548	15	33.667
1283	a0059A20	13,24,38,42,62,72,85	83332	156235	90986	90976	0.99989	79	52	52	1091	2068	4825	3.088	12521	107545	68.835	1295	108	9.436	85	1128.77	95	479.442
1284	a0059B20	15,39,4,50,61,72,83	82526	166285	138841	137766	0.992257	31	31	98	215	5271	83571	50.258	83571	163402	98.266	1192	32	96.08	154	38.227	45	14.022
1285	a0059C04	14,31,44,53,6,71,85	81778	139884	142748	141654	0.992336	31	50	96	317	2586	32422	23.178	39605	129325	92.452	1852	62	88.881	257	56.58	58	17.466
1286	a0059C14	13,20,36,48,56,73,86	82912	164460	118170	114198	0.966387	55	79	84	178	2118	21656	13.168	68269	167396	101.785	5630	107	88.536	206	73.083	264	14.39
1287	a0059C19	20,31,40,60,7,78,81	81988	137001	151356	148710	0.982518	31	32	97	660	4093	20259	14.787	35366	131002	95.621	1427	45	92.593	221	43.027	39	16.385
1288	a0059D23	12,20,33,51,61,76,83	82114	157260	144044	143294	0.994793	49	37	91	191	3743	45216	28.752	45408	138497	88.069	2393	71	85.696	199	94.563	162	22.698
1289	a0059E07	12,21,36,44,58,78,91	82848	169844	164505	164369	0.999173	37	50	92	461	2788	10499	6.182	64039	139429	82.092	1269	61	80.391	202	160.604	17	50.706
1290	a0059E09	12,15,27,48,65,78,87	83492	154054	145311	145035	0.998101	55	45	81	705	2669	16200	10.516	28412	120106	77.964	5461	88	73.853	154	255.058	19	52.684
1291	a0059E15	23,35,41,5,54,74,88	82574	150995	126696	123304	0.973227	61	28	75	313	5334	88289	58.471	88289	149372	98.925	4635	58	86.811	125	152.656	63	13.222
1292	a0059G20	12,26,38,48,56,75,79	82930	159365	157541	155963	0.989984	61	19	76	1110	8043	43347	27.2	47368	152818	95.892	3229	44	92.82	84	125.929	63	13.714
1293	a0059H10	18,3,39,40,60,73,79	82794	157953	146602	143716	0.980314	61	35	74	260	3938	33858	21.435	40236	137838	87.265	5101	69	79.507	90	330.278	232	11.397
1294	a0059H24	19,36,45,59,7,78,89	83392	150029	95859	90114	0.940068	61	38	74	230	3796	54647	36.424	69147	144260	96.155	4292	57	87.876	115	140.722	193	10.399
1295	a0059J03	22,3,30,40,65,66,82	83070	170640	137453	135041	0.982452	49	45	91	197	3753	55708	32.647	83134	168908	98.985	2793	58	90.854	89	154.157	99	19.051
1296	a0059J04	18,2,38,49,64,70,80	82498	165176	136340	133040	0.975796	37	29	96	166	5721	107172	64.884	107172	165934	100.459	1176	34	96.421	79	51.975	196	9.214
1297	a0059J12	15,32,44,6,64,66,89	82162	145143	94044	88563	0.941719	37	76	89	168	1536	63155	43.512	63155	116744	80.434	1452	63	71.268	205	193.083	166	12.777
1298	a0059J18	19,3,32,42,62,66,80	82510	161904	124617	120779	0.969202	55	62	85	178	2734	42274	26.111	70163	169531	104.711	5033	72	94.114	96	72.115	190	13.721
1299	a0059K21	11,25,32,45,64,76,81	82822	185822	153950	152135	0.98821	61	30	76	732	5400	107086	57.628	107086	162028	87.195	4707	57	83.025	77	402.143	34	17
1300	a0059M03	17,3,33,51,58,67,91	82156	146180	126883	125189	0.986649	25	21	99	122	6924	139738	95.593	139738	145415	99.477	1147	15	96.512	88	54.875	1	270
1301	a0059N04	17,2,32,47,62,77,79	83092	142476	113993	111906	0.981692	37	38	95	161	3659	111217	78.06	111217	139077	97.614	672	34	93.438	59	139.542	83	13.446
1302	a0059N07	1,26,31,42,59,69,85	82670	151732	146356	144215	0.985371	55	22	85	178	7196	154533	101.846	154533	158321	104.343	3657	18	72.823	45	902.867	65	9.338
1303	a0059N14	2,21,33,51,62,66,89	82488	150207	143850	142711	0.992082	61	11	76	1786	12270	33141	22.064	41671	134977	89.861	4751	43	85.625	51	423.373	0	0
1304	a0059O19	15,29,51,55,67,87,9	83198	144389	74882	67972	0.907721	61	48	73	200	2777	20112	13.929	41967	133332	92.342	3911	71	82.389	149	150.772	232	12.772
1305	a0060A01	14,35,46,60,77,84,9	83080	145589	108262	99527	0.919316	43	61	91	176	2419	33812	23.224	54323	147560	101.354	2486	66	90.518	177	57.107	272	13.592
1306	a0060A02	12,21,27,43,56,66,86	82974	163412	94642	89233	0.942848	61	31	74	203	5314	84804	51.896	84804	164757	100.823	5575	55	88.627	90	185.378	138	13.775
1307	a0060A05	13,20,37,51,62,70,88	83168	168266	128190	127108	0.991559	73	41	59	1253	4803	108399	64.421	108399	196927	117.033	2615	143	46.586	141	222.589	147	397.905
1308	a0060A22	26,36,48,5,62,78,83	82668	158709	122243	118875	0.972448	49	56	92	174	2969	102442	64.547	102442	166265	104.761	1710	41	96.895	46	60.826	192	11.094
1309	a0060C18	13,15,37,40,63,67,91	82564	111782	105708	103577	0.979841	61	21	75	516	5272	41645	37.256	44741	110731	99.06	4561	53	92.875	67	101.09	68	17.515
1310	a0060C20	2,22,31,42,55,70,87	83560	175875	80727	74083	0.917698	61	80	71	332	1802	10752	6.113	39072	144181	81.979	10354	176	68.903	444	105.214	350	22.791
1311	a0060D04	18,28,51,61,71,8,81	82364	147351	141922	139215	0.980926	61	24	76	659	5991	40190	27.275	41640	143789	97.583	4435	62	91.927	81	138.358	56	12.286
1312	a0060D06	25,37,45,62,75,84,9	82850	151493	148483	148457	0.999825	73	60	60	1494	2779	5464	3.607	14651	166792	110.099	1613	145	16.965	99	569.717	130	533.769
1313	a0060E02	22,27,46,5,53,74,83	82404	162030	67953	62135	0.914382	25	68	96	172	1705	22938	14.157	35682	115968	71.572	4551	141	78.217	407	84.042	109	10
1314	a0060G17	20,30,50,54,68,7,79	83556	174936	124318	123759	0.995503	55	60	80	588	1999	5933	3.392	22949	119955	68.571	7989	106	59.234	166	423.819	39	24.641
1315	a0060G22	12,17,36,43,64,73,83	83032	163543	158879	158558	0.99798	61	21	76	1703	7135	29385	17.968	30775	149852	91.629	4774	59	88.496	76	243.605	9	33.333
1316	a0060K08	2,24,38,44,55,71,79	81968	159627	90987	82979	0.911987	31	85	97	132	1925	46740	29.281	56138	163672	102.534	1767	58	91.061	194	60.052	246	10.646
1317	a0060K22	10,22,32,40,59,76,91	82548	138188	153716	153711	0.999967	73	67	60	1285	2531	4734	3.426	18512	169595	122.728	2161	163	15.406	138	320.159	168	432.839
1318	a0060L14	1,17,32,46,59,71,82	83012	184288	84159	70349	0.835906	49	100	81	255	1037	8771	4.759	32475	103760	56.303	5051	154	43.99	368	278.796	25	24.92
1319	a0060L24	15,32,46,57,78,8,83	82716	157803	144981	144780	0.998614	37	25	96	544	5684	27011	17.117	43340	142100	90.049	1218	44	88.718	84	203.155	31	23.806
1320	a0060O20	10,21,30,50,55,71,85	83302	160906	140241	139973	0.998089	67	31	68	521	5707	105755	65.725	105755	176919	109.952	1337	97	54.56	124	418.121	71	299.563
1321	a0060P16	1,23,27,52,59,74,84	83378	154254	129281	127376	0.985265	61	13	76	417	11077	97370	63.123	97370	144001	93.353	2192	39	89.967	42	320.595	60	33.533
1322	a0061A07	20,3,31,49,61,67,80	82194	146508	141992	140405	0.988823	61	11	76	4512	13186	83150	56.755	83150	145053	99.007	2136	31	95.911	33	154	38	23.895
1323	a0061A13	11,25,34,51,63,70,85	82604	143098	135082	134111	0.992812	61	6	77	184	24094	143645	100.382	143645	144568	101.027	1340	10	96.925	15	293.333	0	0
1324	a0061B04	11,21,37,46,61,69,83	83494	145039	107018	104063	0.972388	55	51	81	181	2531	37309	25.723	43049	129091	89.004	5335	59	76.954	93	342.043	171	9.45
1325	a0061C08	22,3,31,43,58,76,84	82358	145967	28505	25887	0.908156	73	35	45	554	962	1973	1.352	4877	33677	23.072	972	127	11.533	139	836.561	97	132.485
1326	a0061E08	18,28,3,46,59,67,83	83196	148830	127617	124770	0.977691	61	19	76	199	8052	53281	35.8	54354	153002	102.803	2486	43	97.272	53	34.094	94	23.968
1327	a0061E11	19,27,46,63,78,9,91	82632	177407	169761	169288	0.997214	55	40	83	293	4041	88284	49.764	88284	161671	91.13	2222	61	89.025	80	233.338	75	10.72
1328	a0061F01	1,20,32,50,61,78,88	82748	138071	137541	137192	0.997463	67	27	68	776	6282	43582	31.565	46992	169624	122.853	2029	103	69.036	94	216.117	80	280.462
1329	a0061F22	13,19,29,43,61,70,83	83126	139532	85521	81176	0.949194	61	19	74	193	7585	76827	55.06	76827	144120	103.288	2472	35	96.337	34	99.441	165	10.485
1330	a0061F24	10,16,29,49,63,71,86	83892	152274	93156	85832	0.921379	49	71	91	178	2305	108244	71.085	108244	163696	107.501	2698	44	89.116	117	122.838	183	12.033
1331	a0061G07	20,30,48,5,61,69,85	82684	144951	152480	151666	0.994662	31	17	99	290	8444	86097	59.397	86097	143549	99.033	1144	40	97.011	123	23.252	49	30.061
1332	a0061I03	15,33,47,57,6,76,91	83426	163192	81990	79166	0.965557	55	78	81	187	1492	71895	44.055	71895	116443	71.353	4784	138	61.675	443	135.54	242	10.331
1333	a0061I21	1,22,37,46,62,72,89	82732	165133	113400	108318	0.955185	25	64	99	141	2461	37642	22.795	50541	157546	95.406	2629	89	87.745	328	51.747	183	17.836
1334	a0061J01	19,31,4,40,59,75,88	83064	175022	103737	98480	0.949324	37	69	93	181	2271	40498	23.139	42843	156767	89.57	3643	74	81.499	132	226.712	141	17.411
1335	a0061K05	21,33,44,54,76,8,84	83222	174105	109142	107138	0.981639	61	69	74	704	2052	9490	5.451	20297	141636	81.351	13652	190	70.657	335	149.907	61	14.23
1336	a0061K07	10,19,34,42,56,76,89	82690	151551	135176	133234	0.985634	55	51	82	194	2516	26358	17.392	53380	128346	84.688	5320	77	75.83	150	230.493	163	12.613
1337	a0061K12	10,17,30,49,61,66,90	83102	161918	78287	71885	0.918224	37	91	83	166	1096	5868	3.624	26479	99758	61.61	2858	123	56.894	440	149.527	286	14.003
1338	a0061K17	22,39,44,6,63,70,91	83186	136900	123488	122133	0.989027	61	19	77	353	7323	73296	53.54	73296	139147	101.641	1752	25	96.499	25	148.52	47	22.979
1339	a0061L24	23,3,33,46,62,68,90	83094	161303	111017	107832	0.971311	61	13	76	195	12598	82923	51.408	82923	163776	101.533	1378	25	98.771	22	40.409	81	13.494
1340	a0061N14	16,36,42,60,77,8,80	82608	147704	97131	94741	0.975394	43	21	95	178	7202	92463	62.6	92463	151258	102.406	1116	23	97.779	41	37.707	136	12.75
1341	a0061N24	13,16,38,40,61,75,82	82842	162931	166565	166304	0.998433	73	38	60	1520	5927	18236	11.192	53806	225232	138.238	1539	101	39.365	134	147.306	140	564.679
1342	a0062A04	17,31,49,58,7,71,88	83390	151217	103778	100647	0.96983	37	33	95	164	4225	27019	17.868	50091	139451	92.219	1479	43	89.743	112	128.545	22	50.591
1343	a0062A07	13,17,29,49,64,74,79	82832	161536	82500	74317	0.900812	43	58	91	173	2726	111981	69.323	111981	158150	97.904	1311	45	84.854	142	154.211	193	13.311
1344	a0062A14	2,20,37,40,55,69,82	82950	155932	123823	120483	0.973026	31	67	95	162	1930	32373	20.761	45882	129339	82.946	3190	93	78.314	370	84.446	155	16.587
1345	a0062A18	17,3,32,48,65,70,89	82792	174036	154627	154416	0.998635	43	7	95	20146	23074	55791	32.057	60113	161520	92.808	871	21	91.976	33	403.212	19	34.684
1346	a0062C02	10,26,38,46,63,76,85	83418	158022	88324	84100	0.952176	25	97	94	164	1140	8656	5.478	20514	110658	70.027	4716	173	66.038	879	58.047	129	20.504
1347	a0062C08	16,36,4,51,61,66,79	83188	163401	93064	83756	0.899983	37	115	89	157	1229	31643	19.365	54824	141411	86.542	3542	123	68.928	319	143.113	393	13.025
1348	a0062D04	1,23,34,47,62,66,85	82754	145780	160762	160394	0.997711	67	32	68	2031	5462	16416	11.261	41573	174804	119.909	2782	144	52.62	139	216.468	202	192.98
1349	a0062D17	24,29,48,55,7,76,85	82404	144656	78727	70562	0.896287	31	104	96	137	1368	33713	23.306	41835	142282	98.359	3689	90	83.849	226	90.978	251	11.167
1350	a0062F01	16,37,44,63,68,7,85	83230	137097	135438	135021	0.996921	67	42	67	644	3484	86947	63.42	86947	146333	106.737	1494	112	45.013	97	524.897	98	249.694
1351	a0062F03	18,35,47,54,69,79,9	82846	149540	171557	171285	0.998415	61	26	76	873	5345	34403	23.006	38333	138992	92.946	4414	62	88.668	101	159.782	96	8.417
1352	a0062F24	18,33,51,59,6,70,84	82938	151226	141686	140490	0.991559	31	34	98	190	4113	96955	64.113	96955	139845	92.474	1810	53	90.717	281	42.886	128	15.531
1353	a0062G11	1,26,39,40,55,71,88	82740	170013	70059	65307	0.932171	25	77	97	151	1874	23764	13.978	52469	144346	84.903	1478	75	79.824	289	115.498	82	11.244
1354	a0062H04	16,2,27,48,53,68,80	83270	155989	7833	7833	1	73	11	57	947	971	1338	0.858	1435	10682	6.848	10	23	0.918	18	8330.67	21	219.286
1355	a0062H16	20,39,51,56,67,7,84	82704	167627	138754	138592	0.998832	49	38	88	611	3274	66893	39.906	66893	124442	74.237	1920	53	72.79	118	386.449	1	11
1356	a0062J01	17,3,38,40,62,78,88	83360	146396	145960	145830	0.999109	49	30	89	502	4200	64272	43.903	64272	126005	86.071	1225	45	85.389	64	332.141	2	66.5
1357	a0062J07	18,36,48,54,67,7,87	82812	160547	131066	129884	0.990982	55	33	86	182	4574	96655	60.204	96655	150949	94.022	2235	39	90.035	38	397.895	58	15.138
1358	a0062L08	26,3,30,41,59,71,90	82600	161064	128990	126942	0.984123	55	54	84	194	2622	33597	20.859	44068	141612	87.923	4635	84	81.307	106	265.651	220	8.859
1359	a0062M01	10,25,35,40,53,74,90	82088	165278	144751	144375	0.997402	61	23	77	308	6579	77729	47.029	77729	151331	91.561	2877	47	88.99	90	199.433	26	9.538
1360	a0062M21	2,23,29,46,61,74,85	82756	170331	135999	134612	0.989801	25	101	97	289	1433	16866	9.902	60275	144797	85.009	3419	129	78.211	495	72.426	64	19.734
1361	a0062N10	11,22,34,47,61,76,79	82376	154184	112473	104264	0.927014	61	36	73	205	4499	48462	31.431	50190	161980	105.056	4618	59	88.454	130	113.008	264	11.784
1362	a0062N21	23,39,43,61,67,8,87	82842	162666	143069	142433	0.995555	61	23	77	550	6984	109740	67.463	109740	160641	98.755	4799	61	91.41	109	108.798	107	19.757
1363	a0062P14	17,28,52,6,63,74,85	82548	174457	127976	124338	0.971573	61	10	76	210	17706	164853	94.495	164853	177060	101.492	1956	14	91.048	55	276.2	22	19.409
1364	a0063A19	10,18,30,46,53,77,79	83260	159196	109537	105319	0.961492	55	64	84	179	2534	30614	19.23	66209	162188	101.879	4441	81	91.409	165	55.685	416	10.791
1365	a0063B23	25,30,46,5,60,72,82	82924	150515	139682	138658	0.992669	25	62	98	278	2110	86155	57.24	86155	130858	86.94	1873	88	84.138	297	74.556	79	21.924
1366	a0063D13	23,33,49,58,6,73,81	82650	173770	121865	115537	0.948074	43	59	91	226	2621	29785	17.14	40206	154666	89.006	2090	83	83.216	183	140.049	217	16.3
1367	a0063D17	1,18,39,51,54,74,85	82722	132305	85770	83688	0.975726	31	46	95	181	2321	30590	23.121	33688	106805	80.726	2358	66	77.335	198	148.596	25	22.6
1368	a0063F12	26,38,43,54,7,71,81	82800	152424	92378	90795	0.982864	55	39	83	178	2791	33863	22.216	36782	108852	71.414	3241	49	65.337	87	597.161	80	11.025
1369	a0063G12	13,21,34,52,62,77,84	82796	133276	147636	147315	0.997826	55	28	84	593	4429	17444	13.089	50710	124028	93.061	2823	51	89.021	119	111.437	28	48.964
1370	a0063H01	11,26,37,44,60,72,80	82656	147513	114471	110772	0.967686	37	35	96	153	4309	79371	53.806	79371	150818	102.24	1154	28	94.074	83	92	134	8.246
1371	a0063I24	18,3,38,50,54,76,90	82952	172334	127636	125409	0.982552	55	80	82	276	1871	14750	8.559	45575	149685	86.857	9531	154	77.164	312	115.83	166	19.373
1372	a0063J01	14,36,48,63,68,8,89	83102	174863	171593	171425	0.999021	31	24	97	1114	6497	82056	46.926	82056	155950	89.184	824	34	88.468	167	119.79	9	17.889
1373	a0063J16	2,21,29,52,64,78,81	82234	150637	120547	118600	0.983849	55	32	84	177	4575	106908	70.971	106908	146404	97.19	1307	19	92.888	39	261.667	46	11.043
1374	a0063K15	1,25,35,44,65,72,91	82604	143044	108258	100086	0.924514	31	87	95	139	1583	35814	25.037	45247	137762	96.307	1977	76	81.054	214	111.196	239	13.828
1375	a0063L06	17,34,44,6,60,69,84	83118	142688	84746	84732	0.999835	79	30	54	2881	3286	4322	3.029	8433	98600	69.102	1900	88	9.794	76	1150.63	65	634.846
1376	a0063L11	1,23,37,43,54,70,91	83568	159277	136591	135930	0.995161	73	52	60	913	3924	22049	13.843	44781	204083	128.131	2946	143	38.216	87	334.92	116	597.147
1377	a0063L20	16,38,45,5,63,66,80	82432	137395	139707	139449	0.998153	79	29	54	1317	5717	18829	13.704	25524	165819	120.688	1293	91	41.086	88	303.511	127	427.055
1378	a0063M01	17,33,42,57,7,78,79	82816	149716	141983	138063	0.972391	49	62	91	183	2485	78424	52.382	78424	154123	102.944	2319	55	90.014	124	103.645	125	16.784
1379	a0063M02	11,19,27,48,56,77,85	82534	157056	115953	115283	0.994222	61	28	74	631	3505	66300	42.214	66300	98141	62.488	3421	53	59.531	71	890.465	25	13.44
1380	a0063M24	12,14,31,50,58,68,80	81960	137516	123133	120407	0.977861	61	28	76	303	4995	77262	56.184	77262	139869	101.711	5087	48	90.577	100	112.46	54	31.704
1381	a0063N02	10,18,29,43,60,67,90	82650	179434	159415	156999	0.984845	61	34	76	565	5248	19499	10.867	51578	178462	99.458	5814	76	93.179	79	129.443	150	13.427
1382	a0063N18	14,36,45,5,54,76,85	82554	153035	147950	144822	0.978858	55	46	85	179	3397	115484	75.462	115484	156293	102.129	2070	33	89.293	116	135	80	9.062
1383	a0063O07	13,20,38,41,55,67,90	83572	145031	139798	138780	0.992718	61	26	75	846	5006	27578	19.015	61461	130176	89.757	4666	56	84.541	69	316.826	58	9.655
1384	a0063O09	14,3,32,44,63,76,83	83108	153570	70017	69565	0.993544	61	31	76	561	2626	25058	16.317	25251	81433	53.027	5591	81	48.242	105	744.114	25	54.08
1385	a0064C09	17,2,39,42,65,69,80	82702	158153	152902	151838	0.993041	61	14	77	246	11254	96751	61.176	96751	157556	99.623	3626	32	93.848	62	153.145	28	8.357
1386	a0064C16	14,39,43,65,66,7,85	82228	142574	115301	113302	0.982663	55	59	83	187	2192	33350	23.391	48090	129376	90.743	3291	66	84.794	76	277.263	45	13.511
1387	a0064D22	14,2,35,52,65,74,79	82322	169181	137783	134923	0.979243	37	55	92	220	2625	34316	20.284	38127	144376	85.338	1474	79	80.846	203	147.645	90	27.033
1388	a0064E01	12,24,39,44,65,76,90	82360	185381	182930	182057	0.995228	49	55	87	716	2824	12487	6.736	62983	155333	83.791	2704	67	81.019	128	271.07	59	8.305
1389	a0064E14	26,29,40,5,59,73,82	83560	113918	85072	79642	0.936172	61	26	74	186	4605	37751	33.139	47042	119735	105.106	3541	47	93.437	48	96.812	277	10.217
1390	a0064F13	25,35,49,54,6,76,89	82850	113956	141022	139997	0.992732	61	7	76	2886	16032	101050	88.675	101050	112226	98.482	1702	19	96.458	29	127.931	14	23.286
1391	a0064F18	10,20,39,41,65,72,88	82726	171002	145101	143142	0.986499	37	19	96	240	8834	86684	50.692	86684	167847	98.155	2040	34	95.673	111	56.523	69	16.304
1392	a0064G09	13,25,38,52,54,70,87	82484	163434	148528	148119	0.997246	49	57	83	597	2084	11995	7.339	40468	118804	72.692	4159	99	69.9	203	237.113	48	22.083
1393	a0064G20	20,37,4,42,61,68,89	82376	174147	125208	120130	0.959443	55	57	84	185	3199	18865	10.833	54598	182381	104.728	8356	109	90.51	161	78.925	239	15.979
1394	a0064H10	14,3,35,40,55,67,89	82922	151242	150133	148934	0.992014	61	14	76	859	10081	58823	38.893	62729	141136	93.318	1837	29	91.151	36	370.639	3	13.333
1395	a0064H18	20,35,51,55,6,73,79	82802	168675	120983	120829	0.998727	73	74	57	1510	2230	4079	2.418	17118	165091	97.875	2395	186	10.127	125	634.16	187	386.759
1396	a0064I17	22,33,40,56,68,7,89	83434	143966	150395	149821	0.996183	61	18	76	1127	7823	98777	68.611	98777	140827	97.82	5031	56	91.471	88	132.511	28	22.071
1397	a0064I21	20,28,4,41,59,69,84	83034	144553	138197	137920	0.997996	31	10	98	130	13781	128126	88.636	128126	137816	95.339	1627	22	88.645	62	253.484	20	34.9
1398	a0064J01	12,14,32,40,64,78,82	83334	145217	81337	75908	0.933253	37	78	83	238	1071	8904	6.132	12047	83604	57.572	3852	118	51.915	277	242.22	120	22.767
1399	a0064M14	26,38,41,5,61,72,87	82912	170416	128806	125968	0.977967	61	26	76	234	6497	55094	32.329	82377	168929	99.127	2310	53	94.448	130	52.262	129	20.674
1400	a0064M18	10,23,31,47,58,77,91	83060	151330	150066	148560	0.989964	37	74	90	474	1712	13417	8.866	28792	126721	83.738	1913	82	79.299	273	108.476	108	15.861
1401	a0064M21	11,21,39,52,60,76,87	82672	154884	122368	122086	0.997695	61	50	75	595	2438	27854	17.984	45358	121906	78.708	6978	101	71.226	170	259.065	39	13.462
1402	a0064M23	19,31,42,6,65,74,82	82880	149875	103995	103958	0.999644	55	18	80	583	3805	38864	25.931	38864	68500	45.705	2182	42	43.694	54	1551.63	18	33.333
1403	a0064N01	1,21,32,47,53,76,90	82596	184537	91996	87247	0.948378	55	75	84	175	2650	167114	90.559	167114	198775	107.716	2622	42	79.94	97	352.155	254	11.256
1404	a0064O18	26,39,45,57,6,75,86	82962	162619	97994	93250	0.951589	43	57	91	178	2788	113184	69.601	113184	158947	97.742	1213	51	92.415	89	121.326	128	12.008
1405	a0065A08	2,22,34,51,60,74,80	82318	156283	85818	80766	0.941131	55	63	84	179	2561	47022	30.088	71203	161370	103.255	4971	74	90.552	104	109.769	191	17.534
1406	a0065C04	12,21,34,51,59,71,87	82464	137232	106897	105008	0.982329	43	20	91	260	5186	55840	40.69	55840	103725	75.584	1084	27	73.308	69	520.058	16	46.625
1407	a0065C23	24,30,49,5,55,74,80	82932	169829	153253	152274	0.993612	49	19	92	426	8793	40058	23.587	62312	167081	98.382	2457	48	92.575	224	40.272	71	50.549
1408	a0065C24	12,21,38,50,57,72,82	82860	155487	133947	133184	0.994304	37	35	95	293	4023	70788	45.527	70788	140808	90.559	3153	80	85.969	168	113.036	142	19.908
1409	a0065E21	12,23,29,43,65,69,81	83172	161433	164594	164162	0.997375	49	49	88	624	2749	15488	9.594	38052	134705	83.443	3679	88	80.939	170	173.518	31	41.065
1410	a0065E22	12,23,31,49,64,76,85	82434	150268	97696	94034	0.962516	55	69	85	177	2363	39807	26.491	52536	163085	108.529	2778	58	95.522	90	35.5	225	15.707
1411	a0065F19	25,37,44,59,69,8,87	82832	167141	158003	156320	0.989348	61	23	77	867	6894	44550	26.654	55600	158564	94.868	5405	69	89.836	111	133.676	113	19.035
1412	a0065H02	19,33,50,57,67,8,80	83458	159146	158860	158726	0.999156	43	47	88	909	2570	8204	5.155	28419	120795	75.902	2280	71	74.004	185	219.751	42	17.095
1413	a0065H18	24,36,42,55,6,75,89	82892	171307	106490	101833	0.956268	61	18	75	235	9332	39107	22.829	78245	167986	98.061	2012	33	94.228	32	266.812	104	12.981
1414	a0065K17	18,37,49,5,54,78,82	83042	188698	148712	145939	0.981353	61	31	76	467	5758	47235	25.032	75980	178508	94.6	5307	69	89.473	122	159.59	44	8.977
1415	a0065L24	21,35,47,5,57,78,84	82792	155543	100815	93800	0.930417	61	41	74	192	3738	40528	26.056	54121	153263	98.534	4154	65	89.709	102	134.569	194	11.758
1416	a0065N21	10,21,31,40,61,68,87	82966	167407	149413	148412	0.9933	25	15	99	1436	11130	103655	61.918	103655	166961	99.734	1979	38	96.411	139	35.712	47	22.234
1417	a0065O05	25,36,42,56,78,82,9	83678	157099	150236	149859	0.997491	37	28	94	341	4628	28022	17.837	37986	129610	82.502	2118	49	80.931	104	280.327	25	32.12
1418	a0066B15	22,38,40,5,54,67,79	82452	144350	148704	148472	0.99844	55	28	84	903	4502	17654	12.23	33630	126078	87.342	4076	51	83.665	84	280.238	3	13
1419	a0066B20	17,2,38,52,59,72,91	83518	134204	147454	146211	0.99157	43	20	95	188	6423	32889	24.507	33112	128470	95.727	1290	34	92.687	58	143.948	55	26.636
1420	a0066B22	10,14,34,44,57,73,79	82156	157616	124131	119208	0.96034	55	72	84	179	2343	38494	24.423	51894	168722	107.046	6728	87	93.074	96	88.635	188	12.809
1421	a0066B24	1,20,37,52,65,76,85	82800	161203	146708	144630	0.985836	61	21	76	321	7286	40189	24.931	70347	153022	94.925	1389	41	92.686	45	237.533	38	29
1422	a0066C10	12,21,37,47,64,75,80	83540	166417	150770	150645	0.999171	61	32	75	1136	4126	21720	13.052	51107	132048	79.348	4979	73	76.154	96	408.312	3	162
1423	a0066C16	18,36,4,45,58,75,83	83108	153997	159758	159755	0.999981	43	25	92	2514	4249	10013	6.502	19020	106232	68.983	2417	40	67.304	141	356.851	1	35
1424	a0066D04	13,16,31,45,58,70,81	82396	146082	142549	142119	0.996983	43	13	95	230	11207	92165	63.091	92165	145697	99.736	954	31	97.351	45	47.689	51	33.804
1425	a0066D14	13,18,35,51,53,67,80	82768	147214	133601	132905	0.99479	55	13	84	677	9301	103276	70.154	103276	120920	82.139	2467	28	75.718	31	1139.03	30	14.567
1426	a0066E13	15,32,45,54,7,72,86	82878	146162	112915	112850	0.999424	79	68	50	1008	1983	3429	2.346	9614	134865	92.271	1723	154	12.501	120	589.525	125	457.184
1427	a0066G17	12,19,34,44,62,75,83	82906	179584	96457	88074	0.913091	37	61	93	159	2550	49803	27.732	63873	155595	86.642	1072	72	82.933	157	178.643	205	12.698
1428	a0066H15	18,39,44,59,7,71,80	83062	171650	107430	101843	0.947994	61	33	74	307	5217	109070	63.542	109070	172185	100.312	5327	59	89.695	67	243.433	144	9.569
1429	a0066I17	10,21,39,51,57,70,90	82618	140095	139791	139275	0.996309	61	11	77	302	12471	95947	68.487	95947	137187	97.924	1849	25	95.937	28	203.286	0	0
1430	a0066J15	26,38,44,57,77,8,91	82432	134584	126286	125073	0.990395	37	26	96	199	5090	51266	38.092	55740	132352	98.342	1926	44	94.789	84	67.476	76	17.697
1431	a0066J16	13,14,34,47,53,78,83	82546	184444	159490	157081	0.984896	55	17	85	179	10946	58451	31.69	70294	186088	100.891	2543	30	96.787	26	169.154	61	25.049
1432	a0066J21	24,31,43,60,69,83,9	82544	153036	147484	147135	0.997634	31	36	96	658	3183	21205	13.856	42762	114610	74.891	566	57	74.047	199	190.94	102	16.863
1433	a0066K01	2,23,35,51,58,69,84	82888	181626	118564	115073	0.970556	25	58	98	194	2798	21865	12.038	30832	162308	89.364	1981	96	86.032	383	60.796	109	19.128
1434	a0066K12	10,26,34,47,65,75,90	82762	166485	129248	127321	0.985091	55	50	84	420	3166	40164	24.125	47361	158306	95.087	8225	107	87.091	172	119.797	44	20.136
1435	a0066L20	12,18,39,49,61,75,91	83084	164582	133456	132771	0.994867	25	67	98	313	2050	19186	11.657	34244	137400	83.484	4174	120	79.994	346	89.668	98	19.408
1436	a0066M01	12,17,32,44,53,72,88	83202	185307	162501	162047	0.997206	31	40	97	556	3891	45097	24.336	52233	155652	83.997	2759	74	82.309	265	120.634	14	58.214
1437	a0066N01	19,27,4,41,61,74,80	82580	150528	96714	91815	0.949345	31	59	97	136	2156	44904	29.831	50453	127261	84.543	1310	66	78.342	192	154.464	303	9.716
1438	a0066N08	22,3,32,46,64,73,86	82776	180408	131801	126724	0.96148	37	44	95	155	4009	88798	49.221	88798	176399	97.778	2232	50	93.176	90	116.678	116	15.603
1439	a0066N11	12,16,30,41,62,67,82	82504	142776	141317	141032	0.997983	31	43	97	593	2905	65228	45.686	65228	124945	87.511	2424	66	84.537	232	91.724	16	49.875
1440	a0066O17	11,18,39,48,58,69,81	82804	146206	132985	132030	0.992819	31	62	95	288	1867	9519	6.511	17150	115772	79.184	2061	103	76.272	434	74.601	69	33.551
1441	a0066P12	20,30,52,60,67,86,9	83430	166945	112504	107350	0.954188	61	52	74	214	3129	15867	9.504	32100	162750	97.487	8609	114	87.214	251	73.825	200	14.075
1442	a0067C12	15,34,4,48,57,74,86	83308	153417	152883	152556	0.997861	73	25	60	1889	7877	32387	21.11	35101	196946	128.373	1465	77	54.739	50	277.4	55	1010.33
1443	a0067D11	1,16,30,43,55,66,89	82492	162150	119706	118878	0.993083	37	77	89	299	1495	25949	16.003	38335	115150	71.014	2705	121	69.609	226	208.323	51	43.098
1444	a0067D21	12,22,37,44,56,73,82	83078	184689	102410	97085	0.948003	49	88	90	179	1844	41409	22.421	47568	162273	87.863	3372	100	82.226	171	158.316	445	12.933
1445	a0067F04	21,29,45,56,75,8,89	83298	161833	100696	98019	0.973415	55	79	83	191	1554	90468	55.902	90468	122779	75.868	1959	94	69.797	137	345.197	129	12.302
1446	a0067H05	10,15,36,47,61,78,85	83024	159355	109095	104109	0.954297	61	57	74	518	2315	23108	14.501	57755	132009	82.84	6972	147	78.926	264	118.193	57	41.737
1447	a0067H19	12,14,33,43,57,75,84	82860	162110	154188	152705	0.990382	55	23	85	180	7204	129537	79.907	129537	165693	102.21	3564	26	85.719	39	574.41	50	14.98
1448	a0067J18	18,27,46,6,62,75,85	82420	176988	157918	156927	0.993725	49	44	89	328	3377	21894	12.37	40972	148590	83.955	3126	93	78.334	274	116.047	529	12.38
1449	a0067K17	25,3,39,45,56,72,80	82958	155486	199033	198865	0.999156	43	28	91	2070	5034	15619	10.045	37595	140975	90.667	2761	44	88.809	125	139.208	0	0
1450	a0067M15	23,31,42,5,56,73,80	82538	143714	95177	91201	0.958225	49	66	90	177	2095	23115	16.084	58985	138274	96.215	2247	57	87.359	77	213.104	213	8.254
1451	a0067M18	18,27,4,44,56,76,91	83642	173992	108780	105188	0.966979	31	58	97	138	2861	86453	49.688	86453	165987	95.399	2511	48	88.542	150	126.5	76	12.645
1452	a0067O07	1,25,32,48,60,68,85	82478	167959	135861	134178	0.987612	31	45	97	613	3219	32853	19.56	39811	144880	86.259	3587	79	83.402	238	113.21	55	16.964
1453	a0068A03	22,37,5,50,61,70,90	83034	167883	131402	130387	0.992276	73	39	58	735	5707	29609	17.637	40657	222592	132.588	1216	123	28.155	144	232.618	197	442.223
1454	a0068A06	1,25,33,51,53,78,87	82374	160558	144881	144330	0.996197	55	38	83	483	3541	84179	52.429	84179	134575	83.817	5905	90	79.506	138	231.739	33	28
1455	a0068A24	26,33,40,6,60,67,87	83322	152855	151964	151848	0.999237	55	37	81	979	3348	22302	14.59	44036	123889	81.05	3346	67	74.961	112	314.884	188	15.995
1456	a0068B21	23,30,5,52,63,76,91	82630	147670	122397	119862	0.979289	43	45	90	200	2778	31317	21.207	36050	125042	84.677	4292	68	78.333	114	265.553	89	19.36
1457	a0068C17	21,30,47,59,66,7,81	82312	143898	151219	151057	0.998929	25	36	99	957	3733	94128	65.413	94128	134392	93.394	799	46	92.535	212	49.929	10	15.7
1458	a0068E16	18,2,28,45,56,74,86	82512	145108	103714	102989	0.99301	61	4	77	21559	24725	53876	37.128	53876	98902	68.158	2210	21	66.127	25	1961.2	2	61.5
1459	a0068F07	15,2,28,41,54,67,80	83106	142705	110082	108505	0.985674	61	21	76	224	6362	110395	77.359	110395	133605	93.623	3301	52	88.582	67	229.791	95	9.453
1460	a0068F20	23,28,49,60,74,8,91	83236	142803	85784	79831	0.930605	61	33	74	228	4348	75393	52.795	75393	143498	100.487	2175	52	93.637	62	99.855	156	18.564
1461	a0068F21	21,37,4,52,53,66,91	82518	156829	144421	144181	0.998338	73	30	61	822	7502	33228	21.187	49293	225082	143.521	1043	92	40.575	71	188.028	128	623.797
1462	a0068G07	26,28,41,65,74,81,9	83076	183738	107162	106345	0.992376	61	74	75	266	1682	8212	4.469	17735	124511	67.766	7973	169	65.391	253	247.874	34	25.824
1463	a0068H09	16,36,40,54,6,78,86	83090	180610	102817	102618	0.998065	55	65	73	203	1236	11250	6.229	31540	80382	44.506	3761	225	49.152	586	143.971	309	24.175
1464	a0068H12	10,19,33,52,63,66,87	82894	158672	129678	129444	0.998196	49	48	87	317	2127	14335	9.034	38402	102107	64.351	1679	72	66.077	123	425.382	46	32.696
1465	a0068H16	15,32,47,60,71,80,9	83396	168433	148224	147803	0.99716	61	30	77	1015	5183	43690	25.939	44788	155497	92.32	7379	85	87.004	99	218.818	10	22.7
1466	a0068J18	1,21,30,41,54,69,86	82114	141923	140605	139778	0.994118	43	42	89	329	2399	14441	10.175	23860	100774	71.006	898	57	69.785	224	186.973	27	37.037
1467	a0068L06	11,23,31,48,61,70,88	82354	147386	128255	124927	0.974052	55	58	84	177	2635	36121	24.508	52267	152871	103.722	5271	67	90.057	68	169.044	209	15.12
1468	a0068P09	14,2,34,49,59,77,90	82964	152782	143828	143560	0.998137	31	26	98	451	4871	79873	52.279	79873	126654	82.899	1967	39	81.461	122	231.221	11	10.455
1469	a0068P14	16,27,52,6,65,66,81	83346	155081	117935	116368	0.986713	55	50	83	179	2569	42558	27.442	58686	128463	82.836	2598	52	76.5	106	329.255	172	8.971
1470	a0068P21	18,28,49,55,6,72,87	82000	158263	151143	150800	0.997731	61	12	77	3835	12270	32829	20.743	60628	147246	93.039	3484	44	90.723	57	256.719	2	24.5
1471	a0069A06	15,34,52,56,72,8,87	82682	142751	101656	97392	0.958055	61	37	75	200	3424	20632	14.453	35798	126706	88.76	5182	82	80.254	72	354.792	165	16.012
1472	a0069A13	14,39,4,40,56,74,81	82028	153389	119008	115300	0.968842	55	68	84	182	2205	33348	21.741	42327	149957	97.763	5103	90	86.448	117	152.068	266	11.259
1473	a0069A24	15,33,49,63,75,8,85	82762	139300	114466	112525	0.983043	31	34	98	138	4089	66398	47.665	67017	139058	99.826	1572	30	95.741	64	86.797	34	11.118
1474	a0069C09	22,35,48,61,74,87,9	83010	166944	128611	124816	0.970492	61	48	75	451	3104	28615	17.14	49863	149004	89.254	6328	112	82.804	159	163.975	103	25.583
1475	a0069D20	13,20,32,49,58,72,91	83112	197733	184104	183836	0.998544	61	32	76	791	5544	25969	13.133	49789	177417	89.726	2903	72	88.716	88	245.08	20	37.25
1476	a0069D24	20,29,46,58,6,78,80	82318	152861	111474	107566	0.964942	61	39	75	270	3866	27855	18.222	51965	150775	98.635	5378	75	87.397	79	197.215	176	20.938
1477	a0069E09	11,14,31,49,55,75,83	83164	146465	118835	118440	0.996676	55	25	80	601	3905	24898	16.999	34389	97642	66.666	3419	61	63.359	115	453.4	34	44.853
1478	a0069F13	18,37,51,60,7,77,89	82630	170791	160258	160005	0.998421	55	46	84	524	3341	39831	23.321	64757	153704	89.995	3939	79	86.933	132	162.917	6	135.5
1479	a0069G19	20,27,41,62,7,77,86	82834	138136	93136	93033	0.998894	73	56	57	1544	2123	3278	2.373	9831	118930	86.096	1929	146	10.632	124	583.992	127	401.85
1480	a0069G20	13,15,29,42,54,78,88	82524	149963	111818	109076	0.975478	61	15	76	202	10245	133615	89.099	133615	153679	102.478	2333	37	98.256	34	35.441	142	9.937
1481	a0069H07	12,20,39,43,58,71,82	82602	143106	164860	164712	0.999102	43	10	94	5587	14098	71780	50.159	71780	140980	98.514	1955	26	96.877	71	60.479	3	58.333
1482	a0069H24	22,32,52,56,70,81,9	82694	157895	52594	44755	0.850953	43	87	78	197	957	3877	2.455	17462	83272	52.739	5538	182	44.545	937	87.461	354	15.847
1483	a0069J15	15,29,48,59,6,75,83	83228	176070	78941	73516	0.931278	31	133	90	164	862	12537	7.12	46260	114728	65.16	2950	158	59.096	416	166.488	202	13.668
1484	a0069J20	23,35,44,63,66,79,8	83116	146490	151540	149046	0.983542	61	26	76	667	5370	74207	50.657	74207	139625	95.314	4819	65	89.092	111	133.27	37	32.054
1485	a0069K24	17,3,31,45,59,73,87	81998	143471	116358	115740	0.994689	61	50	74	476	2199	62546	43.595	62546	109958	76.641	4677	88	73.183	110	348.936	3	30.667
1486	a0069L19	24,29,49,58,69,8,82	83058	174361	87698	82581	0.941652	31	64	98	138	2571	87228	50.027	87228	164576	94.388	1598	53	88.423	152	118.033	193	11.632
1487	a0069M14	11,15,32,49,53,70,87	82790	173155	150344	149065	0.991493	49	43	88	458	3440	77886	44.981	77886	147920	85.426	2469	62	83.46	150	187.633	27	18.296
1488	a0069N23	12,26,35,52,64,71,86	82728	146262	113232	110431	0.975263	61	25	75	372	5866	35037	23.955	71865	146667	100.277	4842	56	91.276	74	152.554	80	18.387
1489	a0070A18	23,30,4,51,60,70,81	82924	151790	145909	142581	0.977191	37	20	97	188	7762	97763	64.407	97763	155249	102.279	2133	35	94.084	118	66.619	48	23.312
1490	a0070B23	22,38,44,53,78,80,9	83352	162130	119568	118289	0.989303	31	46	97	226	2896	34860	21.501	36635	133232	82.176	3085	59	78.995	233	144.876	23	13.043
1491	a0070C14	10,18,36,51,63,72,91	82746	160731	119603	118388	0.989841	61	5	77	659	32279	110928	69.015	110928	161397	100.414	2280	23	98.188	37	73.108	17	12.176
1492	a0070C18	22,35,44,5,62,76,86	83144	170109	178542	176986	0.991285	55	49	83	200	3321	14551	8.554	49664	162731	95.663	4205	68	89.917	85	189.482	101	10.356
1493	a0070D13	20,31,52,57,6,72,84	82882	176634	121901	118670	0.973495	37	39	96	149	4659	174780	98.95	174780	181722	102.881	1019	20	98.865	30	42.3	100	7.35
1494	a0070D18	19,38,50,55,6,66,83	83354	176955	125328	124014	0.989516	31	51	96	179	2992	39325	22.223	56505	152593	86.233	2655	65	83.366	120	238.033	100	8.7
1495	a0070D21	20,29,3,43,62,73,89	83184	153041	165443	164961	0.997087	31	23	98	868	6323	91380	59.709	91380	145442	95.035	1552	33	93.726	116	80.095	11	28.273
1496	a0070D23	22,36,50,64,78,79,8	82710	160854	90848	86582	0.953042	61	22	75	197	6968	128146	79.666	128146	153300	95.304	1314	37	92.498	86	125.709	65	19.338
1497	a0070F04	21,32,5,51,65,74,91	82992	148398	109538	106268	0.970147	55	62	84	179	2503	90853	61.223	90853	155219	104.596	7189	79	84.86	191	110.869	116	11.129
1498	a0070G09	10,23,33,40,57,71,82	83194	157904	195188	195060	0.999344	55	25	84	2937	5754	30734	19.464	49920	143869	91.112	3241	52	88.902	78	223.91	6	9.833
1499	a0070H08	11,26,38,47,53,69,82	83390	156044	147794	146086	0.988443	37	20	96	152	7782	42260	27.082	68500	155642	99.742	1846	43	95.719	84	60.19	117	13.889
1500	a0070L08	11,26,32,42,56,74,83	83052	158575	134862	126645	0.939071	61	44	75	219	3768	42412	26.746	52082	165830	104.575	6026	71	93.896	104	72.125	176	12.375
1501	a0070M17	16,35,52,54,67,8,91	83354	163673	172115	171842	0.998414	31	48	96	766	2992	20463	12.502	60928	143622	87.749	1522	66	86.08	224	99.219	13	42.923
1502	a0070N02	1,20,27,48,57,67,91	83438	155852	89207	84179	0.943637	31	71	96	168	1933	37597	24.124	46549	137306	88.1	2945	90	80.878	233	114.056	311	10.376
1503	a0070N10	18,32,50,59,72,8,89	82590	153231	134141	132367	0.986775	55	43	84	277	3329	47337	30.893	54042	143151	93.422	3200	64	87.713	90	192.556	88	17.011
1504	a0070N18	14,28,4,46,55,68,85	82892	183162	128183	122954	0.959207	49	107	85	209	1393	24670	13.469	67906	149130	81.42	5206	123	69.423	351	149.9	208	16.303
1505	a0070O14	22,33,5,51,63,69,82	82632	169217	148474	147676	0.994625	31	24	98	926	6461	81459	48.139	81459	155080	91.646	2161	46	91.563	132	106.235	15	16.933
1506	a0071A11	1,14,36,41,55,78,84	82452	165560	77507	72392	0.934006	43	63	92	174	2497	123772	74.76	123772	157365	95.05	1217	40	85.536	97	216.897	338	8.604
1507	a0071B13	25,38,48,55,72,86,9	82452	155907	73050	69421	0.950322	61	37	74	297	2560	25923	16.627	30550	94755	60.777	4203	72	54.843	87	785.161	103	20.33
1508	a0071B16	17,34,45,63,7,75,81	83124	185031	150502	147275	0.978558	49	28	92	177	6694	135299	73.122	135299	187446	101.305	1717	27	97.619	46	76.957	86	10.058
1509	a0071C13	12,15,38,42,53,71,83	83196	167908	148326	143166	0.965212	49	35	92	181	4754	151984	90.516	151984	166406	99.105	2139	52	91.183	68	181.206	135	18.385
1510	a0071E23	23,3,39,51,59,76,89	83102	147891	108362	106601	0.983749	61	56	74	430	2008	12515	8.462	18271	112463	76.045	7209	131	69.985	263	158.646	104	25.635
1511	a0071F01	18,37,4,48,64,72,85	83266	146235	151645	151511	0.999116	67	71	66	949	2136	5049	3.453	15615	151673	103.719	3281	208	41.721	174	244.5	209	204.22
1512	a0071F04	25,28,41,6,64,71,88	82184	159428	144301	142025	0.984227	43	32	93	202	4705	102795	64.477	102795	150562	94.439	1639	32	91.1	99	136.475	62	10.935
1513	a0071F18	20,3,32,52,54,77,82	83314	171154	139262	136960	0.98347	61	30	76	642	5629	20186	11.794	47056	168897	98.681	6771	89	92.117	180	57.356	80	39.6
1514	a0071I06	13,26,28,45,64,72,82	82190	160629	123958	121717	0.981921	31	40	98	129	4063	43640	27.168	56581	162547	101.194	1483	30	97.098	66	62.076	42	13.429
1515	a0071M03	11,20,39,42,55,78,85	83040	160777	109464	106698	0.974731	31	68	97	196	2038	21452	13.343	50543	138601	86.207	4764	115	78.255	346	89.853	231	16.762
1516	a0071N09	21,37,41,59,6,78,85	82690	153984	147000	146838	0.998898	61	37	76	1009	3675	23196	15.064	54696	136008	88.326	5261	77	83.946	101	244.693	1	7
1517	a0071N20	24,34,48,5,53,75,88	82570	153028	158718	156523	0.98617	31	65	95	440	2187	28401	18.559	54955	142170	92.905	1331	76	88.613	380	42.179	100	13.97
1518	a0071O12	22,32,4,47,54,66,83	83200	161329	99200	96813	0.975938	31	65	94	194	1912	21191	13.135	25689	124317	77.058	4259	108	72.308	347	123.173	112	17.277
1519	a0071P05	12,24,34,42,61,78,80	83376	166836	171983	171826	0.999087	55	19	84	2118	8014	85031	50.967	85031	152280	91.275	3441	46	89.112	61	297	3	16
1520	a0071P19	26,34,43,53,6,77,89	83012	157225	115488	113871	0.985999	31	47	97	182	3109	77967	49.589	77967	146132	92.945	2709	55	87.671	133	137.767	65	16.323
1521	a0072A05	18,30,43,57,7,72,88	82470	151057	139912	137881	0.985484	37	45	95	164	3148	37288	24.685	39295	141682	93.794	1815	62	88.627	103	139.369	149	18.96
1522	a0072A08	12,17,27,42,62,74,91	82766	166996	141342	141212	0.99908	43	27	92	548	4766	38837	23.256	42475	128704	77.07	1414	41	76.08	89	448.697	3	3.667
1523	a0072B20	21,39,49,64,71,8,83	82686	123185	130806	129438	0.989542	73	49	58	1738	3332	7688	6.241	24800	163285	132.553	1712	141	19.372	108	285.75	140	489.007
1524	a0072D14	11,25,33,48,57,73,83	82892	148368	136554	130420	0.95508	31	69	96	139	2119	55574	37.457	59719	146241	98.566	1965	58	89.83	228	58.412	130	13.623
1525	a0072E13	23,27,47,57,70,86,9	83214	141735	129603	129231	0.99713	37	28	93	491	4067	36746	25.926	37798	113899	80.361	1907	49	78.271	108	280.278	23	22.913
1526	a0072F01	19,29,48,5,63,74,81	83526	150075	112524	109387	0.972122	61	49	75	277	2769	83153	55.408	83153	135710	90.428	6789	99	82.745	168	148.357	84	11.571
1527	a0072F06	26,38,45,60,70,88,9	82746	169014	73767	68582	0.929711	43	84	75	224	997	10793	6.386	19115	83754	49.554	2341	124	45.413	507	175.16	221	15.629
1528	a0072G14	23,32,49,61,68,83,9	83252	158610	146456	142055	0.96995	55	44	85	179	3621	93558	58.986	93558	159357	100.471	2342	50	94.074	107	68.636	154	13.344
1529	a0072I04	16,29,3,42,55,68,81	83664	181114	120013	114624	0.955097	49	67	89	176	2504	45682	25.223	50626	167768	92.631	4531	94	77.706	289	119.806	273	21.077
1530	a0072I07	16,30,4,46,64,71,80	83394	136199	116205	115405	0.993116	37	53	90	457	2064	8192	6.015	24782	109412	80.332	4045	97	75.067	264	115.727	108	31.546
1531	a0072J17	20,36,42,64,7,76,91	82936	179952	126429	119943	0.948698	61	79	74	261	2087	18357	10.201	27352	164907	91.639	6532	145	75.879	218	161.803	352	23.105
1532	a0072J24	19,37,49,55,68,8,88	83092	161487	133080	130994	0.984325	37	46	91	546	3130	92611	57.349	92611	144017	89.182	891	42	87.243	148	138.264	6	23
1533	a0072K05	15,2,34,46,64,75,79	82712	146784	126204	125963	0.99809	49	38	87	261	2868	60078	40.93	60078	108993	74.254	1867	58	74.122	105	359.048	6	47.5
1534	a0072K14	14,34,42,64,74,8,85	81834	139855	154927	154789	0.999109	55	35	80	700	3338	27462	19.636	36300	116862	83.559	3968	64	81.441	116	221.552	13	19.615
1535	a0072O05	23,37,51,65,66,80,9	82838	147479	143202	142913	0.997982	61	22	76	1336	5647	44051	29.869	45346	124237	84.24	3571	50	80.764	116	230.922	91	17.385
1536	a0072O07	13,24,37,52,56,75,83	83616	140336	147405	146720	0.995353	37	21	96	287	6477	70564	50.282	70564	136029	96.931	1966	32	94.349	87	89.954	11	9.545
1537	a0072P08	25,28,3,51,55,66,84	82654	150874	147051	146929	0.99917	61	47	75	560	2411	9908	6.567	22052	113347	75.127	5140	87	71.213	126	342.873	10	23
1538	a0072P12	13,24,35,46,57,68,79	82402	154850	159651	158634	0.99363	55	18	84	750	8142	45510	29.39	48774	146565	94.65	3649	45	91.742	89	140.236	3	102
1539	a0072P13	25,27,3,48,62,69,82	82618	156265	172438	172272	0.999037	79	53	54	1767	4271	11398	7.294	51621	226366	144.86	1651	143	22.582	82	342.89	165	562.794
1540	a0073B07	25,3,37,52,57,78,89	83078	152229	117974	114028	0.966552	37	62	93	168	2231	28621	18.801	43909	138323	90.865	2093	79	84.338	236	85.517	159	23.019
1541	a0073C10	13,21,31,43,57,73,91	83766	165354	73902	71696	0.97015	37	88	74	260	697	3064	1.853	13926	61373	37.116	2702	152	33.708	417	252.348	324	13.54
1542	a0073D01	16,2,39,45,60,71,91	82820	181351	180744	180625	0.999342	61	9	77	7459	17573	85114	46.933	85114	158160	87.212	1918	35	89.906	88	199.443	18	41.944
1543	a0073E05	2,25,37,51,54,72,79	82578	178013	152040	148884	0.979242	43	22	94	289	7877	41818	23.492	47112	173296	97.35	2834	42	92.144	102	112.598	153	16.333
1544	a0073E10	14,32,49,65,67,8,81	82964	152477	105755	102150	0.965912	61	20	76	186	7852	111647	73.222	111647	157047	102.997	2539	38	97.742	29	62.241	104	15.75
1545	a0073E20	24,36,41,5,65,69,79	82268	165254	88711	88473	0.997317	61	39	70	707	1798	8046	4.869	15529	70128	42.436	5996	92	38.35	157	643.745	18	45.056
1546	a0073G07	19,30,52,59,6,77,80	83236	180113	86946	79059	0.909289	31	53	97	137	3459	93970	52.173	93970	183343	101.793	2673	47	93.493	181	59.298	93	10.613
1547	a0073G16	13,24,31,47,59,67,84	83390	156357	138633	138169	0.996653	49	48	84	712	2386	15703	10.043	29528	114571	73.275	3999	82	70.379	122	374.672	30	20.167
1548	a0073G22	17,3,36,47,63,71,84	82556	151154	138551	137097	0.989506	55	35	83	504	3666	24804	16.41	43449	128325	84.897	4285	71	79.107	199	147.151	90	25.522
1549	a0073H05	22,28,51,65,7,70,79	82514	177068	132827	127165	0.957373	31	68	95	346	2210	19461	10.991	39427	150335	84.902	5249	111	77.693	304	127.03	30	29.4
1550	a0073H19	15,31,4,52,65,70,80	82864	125268	86567	84409	0.975071	37	47	89	272	1898	14652	11.697	26848	89209	71.215	2950	80	66.432	170	233.712	116	19.991
1551	a0073H24	16,3,33,41,53,69,89	82994	197148	116159	112506	0.968552	37	60	94	161	3033	50939	25.838	55484	182022	92.328	4255	85	85.933	216	115.227	191	14.885
1552	a0073I08	18,29,5,51,58,76,79	83288	165236	186840	186699	0.999245	67	28	69	1561	7064	37180	22.501	44481	197812	119.715	1661	112	73.117	121	124.843	126	232.659
1553	a0073I16	24,28,47,55,78,9,90	82638	150329	138728	135369	0.975787	55	70	84	182	2196	40695	27.071	46572	153767	102.287	3809	84	90.622	109	92.45	315	12.765
1554	a0073I24	21,38,47,61,67,9,91	82384	164380	110987	99986	0.90088	37	86	93	152	2025	36332	22.102	52016	174151	105.944	1941	76	92.445	192	37.323	476	11.036
1555	a0073J04	16,28,3,52,62,71,79	82680	163287	124708	118542	0.950556	37	59	89	166	1880	28784	17.628	31504	110944	67.944	1392	67	65.774	188	290.75	72	17.014
1556	a0073J08	15,30,4,49,59,73,91	82674	158770	117092	92016	0.785844	55	94	83	310	1713	6922	4.36	40254	161099	101.467	15848	185	60.862	397	146.227	198	20.646
1557	a0073K12	21,38,45,55,68,7,84	82458	168973	167059	166802	0.998462	61	7	77	15409	23076	42815	25.338	57780	161535	95.598	1666	23	94.588	24	381	0	0
1558	a0073K16	1,17,29,50,54,67,89	82698	189406	117176	112399	0.959232	49	77	90	177	2377	39098	20.642	59421	183030	96.634	5503	102	87.607	189	104.354	296	12.669
1559	a0073K20	1,18,36,42,62,70,79	82072	160880	113570	111093	0.97819	55	65	82	190	2271	45603	28.346	55550	147650	91.776	3691	80	84.814	99	231.051	139	11.209
1560	a0073L17	24,37,48,57,77,82,9	83074	169236	122269	120196	0.983046	61	26	75	916	6035	29384	17.363	65569	156932	92.73	4377	63	88.828	102	175.853	39	24.872
1561	a0073L23	21,28,40,57,6,66,80	83164	156286	177787	177540	0.998611	61	26	76	945	5491	31766	20.326	43160	142769	91.351	2422	48	89.535	66	243.545	7	40.143
1562	a0073N03	15,35,40,56,6,70,82	83146	162618	81071	69978	0.863169	31	129	96	138	1263	19506	11.995	53615	162975	100.22	3326	123	83.335	447	46.79	522	11.851
1563	a0073N08	15,3,37,43,59,72,82	82498	151785	158410	156464	0.987715	55	47	82	340	3068	77847	51.288	77847	144199	95.002	2963	67	88.108	91	166.275	237	12.316
1564	a0073P05	22,34,44,65,71,8,88	82666	160318	156127	152089	0.974136	49	25	92	203	6320	98392	61.373	98392	158010	98.56	1915	42	92.042	61	158.721	164	18.756
1565	a0074B10	1,20,28,51,63,77,80	83186	165387	106765	96381	0.90274	31	95	95	170	1509	8590	5.194	23327	143424	86.72	4848	169	78.588	817	39.207	230	14.7
1566	a0074C19	18,27,47,65,68,7,82	82758	158562	91450	91101	0.996184	61	30	74	485	3098	48229	30.416	48229	92958	58.626	3713	58	56.275	75	923.293	5	16.8
1567	a0074D17	11,15,34,42,65,77,91	82442	169252	127957	123465	0.964894	61	50	75	305	3126	20608	12.176	25008	156303	92.349	8012	122	79.881	173	167.89	272	18.404
1568	a0074H21	10,25,37,46,65,68,81	82630	127273	143912	143310	0.995817	55	9	86	174	14223	106306	83.526	106306	128008	100.577	916	12	98.89	23	55	10	14.8
1569	a0074H24	19,3,35,51,54,70,86	83518	121580	110389	107915	0.977588	73	31	59	1144	5610	24090	19.814	65589	173912	143.043	1832	96	30.311	92	191.739	95	706.189
1570	a0074J11	14,2,30,50,61,76,82	83118	163775	142397	141096	0.990864	67	39	68	1359	4647	15133	9.24	20151	181236	110.662	1925	161	54.544	157	195.994	250	174.7
1571	a0074J18	13,26,29,48,57,69,84	82052	151603	164115	163983	0.999196	61	28	75	1773	4366	12586	8.302	26516	122256	80.642	3408	56	78.32	80	410.688	1	12
1572	a0074J19	14,29,3,48,58,72,90	83018	172438	88680	83111	0.937201	31	81	97	139	2050	37415	21.698	65648	166127	96.34	2352	76	87.06	329	60.66	189	12.466
1573	a0074K11	21,37,43,65,77,79,8	82446	163656	71378	64353	0.90158	37	71	93	159	1977	123539	75.487	123539	140428	85.807	2323	59	69.232	253	191.099	164	12.226
1574	a0074K21	17,34,47,56,74,88,9	83102	194088	130061	129695	0.997186	61	34	77	288	4835	28026	14.44	37320	164422	84.715	3965	71	82.721	84	394.619	31	12.548
1575	a0074M11	18,36,46,5,61,68,80	82540	155154	149785	149589	0.998691	49	47	87	518	2466	7873	5.074	19767	115938	74.724	4635	87	70.206	168	266.369	30	49.233
1576	a0074N14	19,36,47,65,77,83,9	82926	194067	117620	114708	0.975242	37	82	90	250	1660	9043	4.66	16563	136148	70.155	3492	130	66.898	657	93.166	115	26.357
1577	a0074N18	16,3,32,51,60,72,87	83082	143164	141222	140493	0.994838	61	37	76	399	3608	34250	23.924	53874	133507	93.255	5659	96	85.415	157	109.064	73	51.466
1578	a0074P05	14,27,4,43,62,71,83	83470	157083	149560	149230	0.997794	67	31	68	854	5544	27131	17.272	34714	171864	109.41	1757	135	64.522	233	102.635	151	210.702
1579	a0074P11	12,15,30,44,57,69,80	82992	148754	125854	121228	0.963243	49	66	91	176	2437	143110	96.206	143110	160874	108.148	1643	45	87.875	78	194.038	281	10.324
1580	a0075A22	2,23,37,44,57,76,88	82678	152813	128313	126512	0.985964	31	60	96	185	2354	22852	14.954	56925	141282	92.454	3079	82	87.532	163	106.135	124	14.137
1581	a0075B22	1,16,39,44,57,78,81	82832	151128	120862	120351	0.995772	61	34	76	462	3556	63727	42.168	63727	120905	80.002	5932	84	75.23	140	258.95	31	38.097
1582	a0075C05	11,16,34,52,57,75,80	82710	171652	92931	79818	0.858895	49	136	85	176	1191	18414	10.728	27252	162086	94.427	5245	176	77.703	428	65.107	754	13.804
1583	a0075C06	17,39,49,60,72,85,9	81956	178953	88239	88240	1.00001	43	33	87	958	1745	3986	2.227	8175	57606	32.191	1481	46	31.154	121	1017.27	4	28
1584	a0075C11	1,20,31,47,55,68,86	82600	141753	196521	196440	0.999588	55	36	81	786	3537	21111	14.893	44534	127346	89.837	3018	56	87.563	97	180.464	3	41.667
1585	a0075D19	11,16,38,51,55,76,88	82982	168567	134394	134059	0.997507	79	78	52	720	2521	11710	6.947	39662	196671	116.672	2587	191	31.421	123	367.74	133	529.098
1586	a0075F15	26,27,50,56,71,8,82	82694	187643	158554	158103	0.997156	61	13	77	5229	14277	123821	65.988	123821	185608	98.915	2223	44	97.721	58	61.345	22	32.682
1587	a0075G18	16,33,43,5,59,68,83	83066	141448	118454	116178	0.980786	55	32	85	179	4637	142412	100.682	142412	148393	104.91	1832	19	91.057	79	154.772	49	8.612
1588	a0075H22	24,3,37,42,65,67,87	83262	156398	140739	136177	0.967585	55	56	83	181	2842	43662	27.917	61489	159153	101.762	3044	63	90.557	104	113.192	194	15.448
1589	a0075I13	20,34,4,46,56,77,83	83700	176340	89822	84113	0.936441	55	84	83	181	1946	37781	21.425	48534	163535	92.738	7019	98	79.714	105	313.867	293	9.614
1590	a0075I17	13,26,39,52,65,78,91	82584	186853	87471	78452	0.896892	37	118	90	166	1280	10943	5.856	23386	151096	80.864	3199	145	72.141	440	104.72	456	13.11
1591	a0075J03	11,19,33,40,53,72,84	82908	163147	123250	121461	0.985485	61	53	75	572	2379	14233	8.724	24920	126118	77.303	6389	119	72.836	212	203.373	89	13.517
1592	a0075L07	25,33,46,64,74,89,9	83086	163411	98011	90691	0.925315	43	63	90	175	2508	92385	56.535	92385	158020	96.701	2820	66	89.076	142	105.359	183	15.792
1593	a0075M13	21,28,3,50,61,74,89	82284	165267	137041	135059	0.985537	25	25	99	140	6541	87859	53.162	87859	163546	98.959	1757	28	92.204	145	82.503	72	12.792
1594	a0075M16	25,33,43,55,6,69,85	83314	164077	167919	167570	0.997922	61	25	75	529	6115	41933	25.557	49970	152889	93.181	3657	60	90.923	95	150.484	28	21.321
1595	a0075N22	10,21,35,52,59,69,82	82598	153310	122925	112042	0.911466	37	69	92	166	2097	37306	24.334	38712	144754	94.419	3239	106	79.438	402	61.45	415	16.436
1596	a0075O06	24,34,52,65,73,89,9	82414	143456	153950	153803	0.999045	73	51	60	1142	3871	15240	10.623	30149	197455	137.642	2089	162	28.931	120	213.367	191	399.733
1597	a0076A02	16,2,37,52,61,77,87	83690	159589	97679	96138	0.984224	79	31	49	1595	4172	35977	22.544	36392	129350	81.052	1222	117	32.528	87	798.828	90	424.222
1598	a0076A09	22,29,40,55,6,74,84	82574	156997	116647	116025	0.994668	55	57	83	288	2332	25963	16.537	29455	132928	84.669	5837	103	80.168	151	199.305	25	41.64
1599	a0076A10	18,29,3,49,65,77,85	83182	152245	87965	87428	0.993895	73	76	56	684	1758	4847	3.184	20046	133624	87.769	3141	228	17.845	274	253.347	246	226.26
1600	a0076A14	10,17,36,41,58,74,89	82508	145825	148218	147087	0.992369	61	33	76	1510	3781	12177	8.35	50827	124774	85.564	5798	74	79.117	105	281.114	29	32.276
1601	a0076G09	20,29,4,44,65,66,86	82418	135629	89873	86552	0.963048	49	60	86	195	1664	20176	14.876	35581	99865	73.631	3250	103	67.224	152	269.855	169	20.331
1602	b0001F19	16,2,36,49,55,67,85	82700	143819	122648	119041	0.970591	55	67	85	180	2235	44100	30.664	44284	149807	104.164	3197	59	93.833	48	146.688	185	9.881
1603	b0001P05	17,38,43,58,6,70,79	83044	169242	146743	144872	0.98725	61	44	74	540	3296	96012	56.731	96012	145047	85.704	3793	87	79.614	131	242.702	155	17.471
1604	b0001P09	13,25,35,43,62,66,81	83872	155274	131150	128872	0.982631	55	53	83	277	2657	23275	14.99	41159	140871	90.724	4365	87	84.186	131	169.595	151	15.483
1605	b0002J03	13,17,39,40,59,70,86	83064	149660	144298	144098	0.998614	61	21	77	1000	6389	84933	56.751	84933	134172	89.651	3575	54	86.902	69	278.725	10	37
1606	b0002N09	1,21,38,52,63,71,89	82628	114652	117083	115901	0.989905	49	38	88	193	2820	23157	20.198	46350	107170	93.474	1573	51	87.465	64	186.094	99	24.869
1607	b0003A06	23,3,32,43,56,71,88	82470	144509	122394	120677	0.985972	31	31	98	135	4655	36183	25.039	38028	144330	99.876	1400	31	95.724	83	66.602	31	21
1608	b0003B03	1,15,38,44,59,70,90	83644	139786	109586	106373	0.970681	55	39	85	175	3742	67361	48.189	68090	145947	104.407	2363	37	95.469	52	97.192	89	14.382
1609	b0003C19	12,14,36,52,62,66,90	82626	179458	138408	137603	0.994184	43	13	94	309	12107	44916	25.029	46812	157398	87.707	983	27	86.794	88	259.443	53	16.377
1610	b0003C24	17,32,5,50,58,69,83	83356	165009	99613	94883	0.952516	55	68	83	183	2251	98817	59.886	98817	153129	92.8	4666	92	82.789	217	115.028	254	13.535
1611	b0003E10	14,30,42,63,67,7,80	82982	149939	122669	121432	0.989916	73	33	58	1534	5908	98986	66.018	98986	194985	130.043	1438	108	46.95	98	222.51	110	524.873
1612	b0003F18	13,17,32,45,56,78,85	83008	153674	171546	170853	0.99596	43	24	93	733	5802	39232	25.529	42709	139252	90.615	950	37	89.292	89	179.157	8	63.75
1613	b0003G06	14,30,4,52,54,75,89	82008	156174	105924	98736	0.93214	37	63	94	165	2345	26583	17.021	32329	147751	94.607	2116	58	83.536	170	130.276	293	12.171
1614	b0003G16	16,34,4,45,62,72,88	83150	145769	85206	77528	0.909889	55	75	82	188	1841	24402	16.74	56599	138141	94.767	5819	94	79.089	111	247.91	225	13.173
1615	b0003G22	12,16,29,51,56,70,80	83046	159447	89570	63932	0.713766	25	94	92	202	1392	11276	7.072	21375	130920	82.109	6008	157	68.846	865	52.654	332	12.434
1616	b0003G24	12,19,36,50,61,69,87	82502	171449	80070	74111	0.925578	43	72	88	199	2077	77479	45.191	77479	149563	87.235	3993	82	80.757	185	172.519	88	12.227
1617	b0003K13	19,29,4,47,60,68,84	82322	138507	149089	148698	0.997377	73	22	61	5055	9987	28330	20.454	45392	219720	158.635	804	69	27.189	38	268.895	64	1416.09
1618	b0003M09	16,33,47,58,66,84,9	83710	141125	135110	134602	0.99624	61	17	77	347	7523	21856	15.487	43579	127903	90.631	3748	49	86.737	61	296.164	28	23.286
1619	b0003M11	10,17,28,43,62,72,86	82818	155948	132094	130417	0.987304	61	17	77	227	8811	46238	29.65	56139	149790	96.051	2236	43	92.785	39	244.103	146	11.856
1620	b0003N23	16,28,41,5,55,70,86	82386	139949	44742	44727	0.999665	79	21	53	1030	2759	31012	22.16	31012	57959	41.414	552	49	9.278	44	2383.77	41	538.488
1621	b0003P11	11,23,32,51,54,67,90	82554	171158	125144	96561	0.771599	25	74	83	157	2320	20472	11.961	50779	171719	100.328	4377	99	84.551	573	41.417	246	11.016
1622	b0004A01	12,19,33,41,56,78,81	81968	186099	189983	189980	0.999984	43	38	92	2010	3457	7715	4.146	17796	131389	70.602	2007	54	69.583	129	438.527	3	12
1623	b0004A07	22,3,37,48,55,71,83	83540	167548	141763	140695	0.992466	49	26	92	212	6397	46956	28.025	47459	166334	99.275	1533	39	96.306	122	36.475	113	15.389
1624	b0004A13	24,39,40,53,78,8,89	82482	151044	142937	142701	0.998349	49	31	89	469	4202	32564	21.559	50120	130282	86.254	2594	53	84.528	72	319.361	12	31.333
1625	b0004C13	21,27,4,48,58,70,84	83006	151018	124387	124331	0.99955	61	35	74	1000	2863	8955	5.93	34875	100212	66.358	5491	73	62.333	101	561.208	3	67.333
1626	b0004F15	2,24,33,42,64,73,82	83210	148037	132493	130495	0.98492	61	40	76	597	3570	38833	26.232	60406	142828	96.481	8997	99	88.077	139	119.95	51	19.176
1627	b0004F23	26,31,50,57,78,87,9	82970	135405	116123	114336	0.984611	55	26	86	179	5399	98647	72.853	98647	140377	103.672	1970	23	97.566	43	47.767	138	9
1628	b0004G19	22,3,35,42,56,77,79	82522	174050	147166	145977	0.991921	61	17	77	262	10452	141993	81.582	141993	177692	102.093	4938	40	93.025	39	295.872	43	13.977
1629	b0004H15	18,2,39,52,57,67,82	82992	147129	149486	147912	0.989471	31	36	97	268	3881	30146	20.49	66981	139736	94.975	1758	55	91.063	181	61.304	102	20.127
1630	b0004M09	21,31,48,5,59,77,89	82832	174842	116493	111952	0.961019	43	45	94	171	3917	109499	62.627	109499	176268	100.816	2203	46	94.097	108	74.287	201	11.433
1631	b0004O07	20,32,41,5,60,76,89	82472	161531	106653	106538	0.998922	61	11	77	1649	9159	42763	26.474	45187	100751	62.373	2383	33	60.421	52	1219.31	17	31.118
1632	b0004O09	20,33,47,62,78,8,82	82526	147335	106617	106452	0.998452	37	34	89	690	2487	10767	7.308	35874	84560	57.393	1623	42	55.963	129	502.101	2	55.5
1633	b0005E19	16,31,4,49,57,68,82	82200	118454	101570	99724	0.981825	55	48	84	181	2403	85545	72.218	85545	115358	97.386	3056	52	89.978	69	156.13	114	9.632
1634	b0005G02	14,3,38,49,60,71,82	82726	135454	89559	86619	0.967172	49	43	90	177	2990	91710	67.706	91710	128576	94.922	1730	47	89.284	48	260.667	169	11.852
1635	b0005G04	15,34,50,6,63,73,80	82634	144610	152834	152821	0.999915	73	65	60	1508	3222	5734	3.965	56571	209460	144.845	2338	162	11.866	106	309.396	149	635.268
1636	b0005J24	11,18,35,49,60,68,86	82698	122974	105554	105241	0.997035	37	44	91	362	1880	22770	18.516	22791	82744	67.286	1032	61	66.546	196	205.418	23	38.174
1637	b0006J02	14,32,46,5,56,75,90	83206	115042	140685	140244	0.996865	61	10	76	624	11004	87236	75.83	87236	110049	95.66	2329	28	93.23	35	222.171	1	12
1638	b0006L10	11,16,36,45,56,69,84	82994	171119	122418	121866	0.995491	37	52	89	247	2124	33458	19.552	39922	110462	64.553	1760	83	62.389	248	254.282	29	44.759
1639	b0006N12	16,35,50,6,61,68,84	82254	133690	126929	126117	0.993603	61	24	76	260	5121	47985	35.893	59307	122914	91.94	3414	59	88.511	140	101.679	42	26.762
1640	b0006N18	15,39,5,51,64,78,80	83318	156943	143471	140018	0.975932	61	25	77	351	6252	30155	19.214	34707	156318	99.602	2982	52	92.39	71	90.789	260	21.146
1641	b0011C03	14,27,48,64,75,81,9	82724	113267	81467	81333	0.998355	79	38	53	1268	2547	5783	5.106	18428	96798	85.46	1595	103	15.183	71	806.803	95	408.284
1642	b0011C05	17,33,4,52,61,73,88	82678	127476	130074	129921	0.998824	43	23	92	1466	4346	22022	17.275	28935	99962	78.416	872	32	77.363	88	325.307	2	115
1643	b0011C20	2,22,37,47,65,78,86	82960	124716	126670	126270	0.996842	55	23	85	204	4606	23850	19.123	29158	105955	84.957	1664	41	83.36	50	407.24	7	55.857
1644	b0011F11	12,16,31,44,55,77,84	82684	145112	136970	134754	0.983821	55	51	82	472	2533	74119	51.077	74119	129212	89.043	4771	100	84.683	298	65.94	131	19.672
1645	b0011J11	14,34,41,61,68,7,88	82890	129670	151599	151249	0.997691	61	4	77	29448	32324	34785	26.826	58694	129298	99.713	370	11	99.254	9	90.556	2	76
1646	b0011K15	11,24,32,48,59,78,79	82564	151280	147267	146483	0.994676	31	21	98	183	6981	50875	33.63	53946	146610	96.913	2479	63	91.315	329	27.14	134	31.418
1647	b0011L08	16,36,41,57,7,71,83	82768	115150	107617	106987	0.994146	61	43	75	410	2052	16002	13.897	31473	88255	76.644	5794	89	71.239	148	219.939	20	28.35
1648	b0011N11	10,21,37,45,58,76,86	82420	126665	115915	113167	0.976293	49	26	87	667	3173	24108	19.033	30491	82502	65.134	2858	43	63.118	115	404.122	12	20.25
1649	b0011P03	12,15,28,51,58,75,89	82664	125076	117975	115363	0.97786	37	23	97	157	5577	103626	82.85	103626	128285	102.566	953	28	96.713	69	37.971	102	14.618
1650	b0012A23	15,3,30,48,56,67,81	83046	138280	124012	123749	0.997879	61	27	76	1406	4183	15885	11.488	26348	112966	81.694	4876	71	78.442	92	324.022	0	0
1651	b0012D09	17,34,43,5,57,76,87	82416	115317	105113	104205	0.991362	55	38	84	197	2828	74017	64.186	74017	107495	93.217	1656	45	88.907	67	177.463	74	12.189
1652	b0012E23	1,24,30,45,56,76,79	82452	124043	81612	76373	0.935806	61	39	74	215	2902	29471	23.759	34126	113180	91.243	5346	81	79.868	85	251.835	226	15.779
1653	b0012E24	22,36,47,5,55,73,88	83398	127360	158537	158494	0.999729	73	55	59	1176	3271	7238	5.683	57375	179910	141.261	1332	141	31.563	98	188.133	144	477.25
1654	b0012F18	19,2,36,40,57,74,91	82428	122755	124332	123361	0.99219	61	20	76	358	5661	30152	24.563	41907	113238	92.247	2488	44	88.09	47	290	51	19.412
1655	b0012G21	17,38,44,61,7,76,89	82684	135739	108716	107301	0.986984	55	45	84	204	2588	74656	55	74656	116472	85.806	4958	72	79	88	310.591	79	14.848
1656	b0012H05	14,2,37,45,64,68,83	83076	125242	97622	97201	0.995687	61	27	76	606	3468	14311	11.427	28823	93636	74.764	4487	70	70.612	71	508.958	15	44.667
1657	b0012I06	25,3,36,49,64,68,87	83046	118921	145964	145878	0.999411	67	25	68	1202	5360	37292	31.359	39980	134017	112.694	1830	95	61.569	97	208.732	82	310.439
1658	b0012I19	26,29,41,6,62,66,79	82776	126348	97947	92410	0.943469	49	42	91	176	3139	38574	30.53	47773	131875	104.374	1874	43	96.831	52	42.038	138	13.174
1659	b0012J10	19,27,44,57,66,7,84	82816	132379	112412	111123	0.988533	55	31	84	210	3913	26894	20.316	35164	121324	91.649	3383	64	89.025	154	87.63	57	18.123
1660	b0012L04	11,19,39,45,63,67,83	82972	128260	116759	115648	0.990485	43	27	91	724	3863	27508	21.447	28625	104303	81.322	2422	65	80.374	132	180.682	33	40.061
1661	b0012M01	20,3,34,45,53,71,86	83300	127586	97310	90565	0.930685	61	19	75	261	7243	106538	83.503	106538	137635	107.876	2301	27	84.414	67	244.075	202	17.485
1662	b0012M17	11,19,30,44,61,68,91	83446	137473	136795	131021	0.957791	31	41	98	147	3487	126974	92.363	126974	143006	104.025	2040	38	86.361	247	68.231	219	8.662
1663	b0012O02	26,29,4,52,56,67,85	82438	128206	84197	76204	0.905068	43	91	83	177	1057	5859	4.57	11141	96271	75.091	4667	118	62.412	203	215.438	318	14.013
1664	b0012O08	17,37,41,55,66,7,87	82668	128991	131992	131982	0.999924	73	53	59	1749	3046	5296	4.106	15630	161485	125.191	1085	131	17.224	96	394.448	130	530.046
1665	b0012O12	14,3,39,52,53,68,84	83074	126690	117578	117097	0.995909	31	34	96	239	3301	29155	23.013	44098	112266	88.615	2238	48	85.784	137	128.007	10	47.3
1666	b0012O18	1,18,29,47,59,78,91	83062	111530	87081	84847	0.974346	37	46	89	341	1796	9870	8.85	14559	82651	74.107	3007	75	68.62	307	108.629	117	14.094
1667	b0012O19	13,21,30,40,64,76,89	82120	124482	110577	108992	0.985666	37	27	94	174	4091	99020	79.546	99020	110464	88.739	747	35	86.665	171	91	53	19.604
1668	b0012O20	2,23,31,52,60,68,89	82678	132394	104747	96605	0.92227	37	58	94	162	2277	78314	59.152	78314	132086	99.767	1901	56	87.323	106	116.632	414	10.679
1669	b0013A02	12,23,39,47,60,78,88	83348	129566	162112	161926	0.998853	61	14	76	1350	9181	67677	52.234	67677	128547	99.214	2488	28	94.876	33	192.182	10	29.7
1670	b0013A12	10,25,28,45,63,69,89	82878	111469	97774	97503	0.997228	61	18	76	397	4064	39464	35.404	39464	73165	65.637	1566	29	64.053	34	1178.53	0	0
1671	b0013B07	15,35,42,62,69,8,89	82288	131107	153083	152715	0.997596	49	21	90	1863	5478	37455	28.568	41429	115054	87.756	1194	28	86.365	52	341.942	6	15.833
1672	b0013E08	1,23,31,51,57,75,79	82806	120171	109461	108611	0.992235	61	41	74	391	2075	8663	7.209	15939	85101	70.817	3549	118	68.059	250	129.46	245	24.567
1673	b0013H11	24,33,49,59,76,87,9	83256	118255	116925	115741	0.989874	73	32	60	1147	5430	25917	21.916	33354	173784	146.957	483	88	35.049	100	109.02	133	495.534
1674	b0013I13	17,29,45,65,76,9,91	82748	131180	111073	107550	0.968282	43	44	93	173	2736	36786	28.042	56060	120401	91.783	1797	55	79.701	166	140.777	212	15.373
1675	b0013I23	10,23,36,49,62,75,88	82588	136669	125824	124170	0.986855	61	37	73	560	3148	20669	15.123	40449	116511	85.25	4465	71	80.53	97	268.113	24	25.125
1676	b0013K01	25,3,38,42,63,75,91	83154	139471	112029	110772	0.98878	43	25	93	183	4795	32743	23.477	36042	119890	85.961	1461	43	83.137	144	149.674	78	25.205
1677	b0013K08	22,29,42,61,73,8,91	82468	119986	132407	127944	0.966293	55	64	82	183	1961	93061	77.56	93061	125567	104.651	4109	69	83.024	201	83.761	311	11.36
1678	b0013K15	24,3,38,45,58,77,89	82904	136366	138498	138277	0.998404	61	21	77	711	5665	32700	23.98	46344	118965	87.239	2698	53	86.197	65	288.077	3	32.667
1679	b0013L21	23,37,4,46,63,75,82	83280	136221	153420	153231	0.998768	37	14	95	421	9048	63605	46.693	63605	126684	92.999	935	25	91.588	77	142.948	31	14.581
1680	b0014A16	16,38,48,59,71,8,84	82874	147311	136899	135444	0.989372	55	32	85	192	4539	37813	25.669	71692	145248	98.6	1682	41	94.539	51	141.118	45	18.844
1681	b0014C17	13,19,31,49,60,77,87	83238	124934	109175	105951	0.970469	37	51	93	209	2060	15177	12.148	20573	105106	84.129	2063	68	78.937	146	164.904	153	14.634
1682	b0014C20	10,19,32,49,57,69,85	82920	137001	106156	97525	0.918695	37	61	93	178	2107	18893	13.79	29528	128539	93.823	3797	97	80.483	277	77.213	320	16.722
1683	b0014E09	13,21,27,44,59,72,83	82584	131995	99598	99558	0.999598	61	20	74	1078	3748	43904	33.262	43904	74968	56.796	2825	45	53.538	66	928.152	6	11.667
1684	b0014E23	11,25,37,47,55,74,91	82642	137710	137540	136313	0.991079	61	7	77	243	19971	115761	84.061	115761	139801	101.518	1517	16	98.721	25	44.92	36	17.722
1685	b0014G11	18,32,49,56,66,7,79	83000	128917	126545	124340	0.982575	61	10	77	314	12694	78261	60.707	78261	126948	98.473	1670	27	95.653	72	72.278	25	16
1686	b0014I13	10,21,27,41,63,67,79	82754	128529	108097	100530	0.929998	55	94	83	178	1480	51062	39.728	51639	139126	108.245	5154	102	84.795	171	77.228	486	13.039
1687	b0014K05	25,38,45,59,6,67,82	83198	130784	92815	87776	0.945709	55	78	83	192	1675	21675	16.573	24705	130665	99.909	8120	108	84.178	190	95.789	190	13.121
1688	b0014O13	2,25,29,40,58,70,89	82426	127653	136875	132442	0.967613	37	20	97	139	6574	124456	97.496	124456	131484	103.001	1089	25	94.297	98	57.714	59	27.525
1689	b0015B08	13,19,39,47,56,66,90	82530	125573	107153	103837	0.969054	55	48	83	241	2241	31017	24.7	31779	107579	85.67	5511	98	79.201	176	138.75	38	44.684
1690	b0015B12	1,21,39,42,56,68,91	83028	128491	85707	78761	0.918956	43	54	91	172	2466	32015	24.916	37014	133194	103.66	986	46	93.305	119	40.269	320	11.906
1691	b0015B15	12,20,35,44,60,70,87	82546	122912	81359	75327	0.925859	43	59	90	172	2094	72265	58.794	72265	123578	100.542	2131	46	89.537	82	128.561	222	10.441
1692	b0015B22	10,18,35,48,57,75,89	83138	127564	57325	55061	0.960506	67	42	58	531	1524	15599	12.228	22133	64036	50.199	1107	178	27.679	201	356.677	165	124.63
1693	b0015B24	12,25,33,49,60,66,80	83370	118979	127756	126599	0.990944	43	40	87	873	2256	7345	6.173	41001	90276	75.876	1488	53	73.531	196	157.439	9	70.444
1694	b0015C17	1,20,29,41,56,74,82	83270	122371	123207	122038	0.990512	55	30	84	227	3923	36359	29.712	44092	117710	96.191	3547	50	90.097	58	190.776	72	14.639
1695	b0015E14	11,24,37,50,63,76,89	83764	120755	133648	132539	0.991702	61	6	77	4462	20322	80311	66.507	80311	121935	100.977	4052	32	94.737	31	193.387	14	25.714
1696	b0015F11	18,32,47,5,63,67,85	82308	130827	90203	87139	0.966032	37	42	96	151	3123	124965	95.519	124965	131187	100.275	196	16	95.168	28	202.214	60	11
1697	b0015I02	14,34,43,54,67,82,9	82814	122801	151112	151095	0.999888	61	31	73	1029	2869	8897	7.245	14081	88962	72.444	3772	60	69.212	83	455.193	4	6.75
1698	b0015K02	15,31,41,58,6,69,87	82944	128985	82455	75174	0.911697	43	62	82	264	1536	47686	36.97	47686	95285	73.873	2739	71	64.687	116	365.129	235	13.587
1699	b0015L14	15,30,41,61,77,89,9	82198	137710	127109	125954	0.990913	61	22	76	455	5063	35796	25.994	49144	111401	80.895	2990	50	77.343	62	488.371	66	13.97
1700	b0015L20	10,25,34,50,60,77,88	82432	125482	134773	133888	0.993433	61	20	76	1411	5660	39601	31.559	45335	113204	90.215	3798	47	85.053	100	177.05	39	26.949
1701	b0015L23	11,21,35,40,62,75,79	82478	116334	145900	145635	0.998184	43	36	89	775	2642	10394	8.935	14603	95129	81.772	1717	51	80.553	143	158.098	2	8
1702	b0015M12	24,34,50,59,7,74,82	82372	134478	121929	120064	0.984704	49	29	91	173	4748	110563	82.216	110563	137696	102.393	1473	27	95.95	28	149.5	114	11.061
1703	b0015M16	19,2,37,43,63,71,80	83272	146031	105657	100579	0.951939	37	46	92	157	2860	85826	58.772	85826	131576	90.101	1656	54	82.203	186	129.962	124	14.645
1704	b0015N21	14,32,47,59,6,68,87	82590	146445	91019	91019	1	43	27	88	872	2121	6146	4.197	9749	57291	39.121	1491	41	37.903	123	738.106	5	30.2
1705	b0015O03	21,31,49,6,62,70,86	83292	127281	113914	110258	0.967906	61	32	76	513	3985	69468	54.578	69468	127546	100.208	3765	57	92.055	57	143.491	104	18.596
1706	b0015O13	16,29,4,43,58,74,91	83012	129324	77008	71192	0.924475	31	78	96	134	1577	40070	30.984	53699	123064	95.159	1883	52	87.418	145	105.29	100	10.05
1707	b0015P03	10,21,32,43,54,78,89	83136	142762	142505	141901	0.995762	67	17	69	1002	9869	97817	68.518	97817	167777	117.522	2037	66	52.793	67	803.851	81	167.099
1708	b0016B12	12,14,39,48,54,70,83	82718	138158	130699	129663	0.992073	61	27	76	1204	4664	20992	15.194	29440	125929	91.149	4858	80	88.055	101	141.02	88	25.682
1709	b0016G02	15,29,3,45,63,70,79	82378	124118	126983	126480	0.996039	61	23	75	865	5105	28334	22.828	38134	117424	94.607	8469	77	85.317	148	116.946	4	229
1710	b0016I19	21,32,42,64,72,79,9	82468	124437	109583	109455	0.998832	73	66	55	822	1935	4507	3.622	18438	127743	102.657	1204	146	14.916	104	506.221	173	307.682
1711	b0016J02	13,21,38,51,60,78,79	83514	129143	108025	103324	0.956482	43	46	92	176	2823	31690	24.539	51320	129869	100.562	693	43	92.641	66	96.576	225	13.911
1712	b0016K20	10,17,32,42,60,73,81	83134	122799	163556	162904	0.996014	55	37	81	1299	2955	7145	5.818	27227	109347	89.046	5211	73	83.458	99	199.162	28	21.321
1713	b0016M08	23,3,35,52,61,75,81	82750	140293	155543	155303	0.998457	55	39	82	814	3339	46194	32.927	48733	130241	92.835	4606	70	81.856	104	211.01	221	15.882
1714	b0016N10	21,28,42,63,78,8,87	83004	145605	148806	148227	0.996109	73	35	60	1558	6240	37646	25.855	37848	218412	150.003	1150	114	30.304	121	126.355	126	684.063
1715	b0016O16	1,25,36,47,58,69,80	82726	118650	140104	139881	0.998408	61	1	77	119254	119254	119254	100.509	119254	119254	100.509	936	10	99.214	8	81.375	8	35.25
1716	b0017G05	2,20,33,41,57,68,87	82770	144252	137655	137428	0.998351	55	23	84	721	5839	74730	51.805	74730	134298	93.1	2413	46	89.295	79	176.215	78	19.5
1717	b0017G07	12,21,35,41,65,68,89	82266	138730	127553	125496	0.983873	55	50	84	187	2696	72470	52.238	72470	134821	97.182	6008	71	84.99	127	157.811	30	26.033
1718	b0017G24	13,23,33,43,53,76,86	82578	126302	111483	111266	0.998054	79	53	53	1492	2503	4145	3.282	16264	132692	105.059	1272	127	17.834	111	435.405	118	469.89
1719	b0017H21	15,33,48,60,69,7,88	82734	127496	150590	150258	0.997795	43	19	94	1009	6550	26068	20.446	41802	124461	97.62	1824	40	93.881	67	101.627	20	49.65
1720	b0017M11	24,30,40,54,72,81,9	82396	141515	84170	80509	0.956505	61	17	75	190	8559	97285	68.745	97285	145507	102.821	2175	27	95.986	49	98.98	64	12.969
1721	b0017P03	13,20,29,40,53,68,85	82642	123953	104638	99474	0.950649	55	67	85	176	2082	47121	38.015	49825	139514	112.554	3233	45	93.134	40	79.95	511	10.395
1722	b0017P09	18,30,41,5,64,73,81	81568	135553	95332	95302	0.999685	61	34	73	445	2017	9685	7.145	26748	68598	50.606	2337	55	48.722	93	746.968	4	10.25
1723	b0018A19	2,25,32,49,63,74,82	83126	131128	93731	89860	0.958701	67	16	66	1016	9790	89191	68.018	89191	156648	119.462	1841	65	53.476	58	775.207	90	178.267
1724	b0018B05	15,2,27,51,61,70,91	82904	121445	138860	138754	0.999237	55	13	84	1853	8496	79038	65.081	79038	110456	90.951	1564	25	89.542	33	383.212	1	55
1725	b0018B13	25,36,40,63,66,7,88	83236	134436	115172	113189	0.982782	61	19	76	285	7048	37300	27.746	63485	133918	99.615	4030	49	92.362	52	174.519	139	8.583
1726	b0018D05	20,39,52,59,73,8,81	83490	126539	100873	93952	0.931389	61	39	75	259	3248	20269	16.018	30499	126672	100.105	5997	73	85.876	94	149.777	259	14.649
1727	b0018G03	21,34,47,60,73,8,86	83144	124191	119584	116453	0.973818	61	21	76	202	5792	69837	56.234	69837	121640	97.946	1483	33	91.857	74	115	87	18.425
1728	b0018G08	24,31,4,51,58,78,85	82084	126640	125354	125163	0.998476	73	46	58	1003	2975	10595	8.366	18878	136889	108.093	669	116	23.737	97	450.196	122	433.689
1729	b0018H18	26,33,5,52,57,74,90	82916	135202	78436	70661	0.900875	61	43	72	222	3036	23834	17.628	30264	130585	96.585	4562	86	84.116	122	137.27	379	12.475
1730	b0018J22	20,27,3,50,63,66,85	83248	122409	110296	110158	0.998749	73	55	58	810	2448	15480	12.646	35007	134648	109.998	1627	132	29.546	97	399.814	127	373.701
1731	b0018J24	22,30,43,6,61,71,86	83096	122047	109921	108419	0.986336	37	18	96	168	6313	28318	23.203	47171	113638	93.11	919	22	90.731	65	161.985	56	13.982
1732	b0018K16	1,14,30,49,58,70,85	83176	122760	96224	91275	0.948568	61	26	75	250	4667	20776	16.924	28530	121346	98.848	5184	57	88.494	52	231.769	169	12.266
1733	b0018M07	24,29,3,44,56,78,84	83164	136687	109688	101528	0.925607	43	81	90	175	1623	73177	53.536	73177	131494	96.201	3649	75	80.387	168	138.381	269	13.234
1734	b0018M12	10,19,29,40,65,78,79	82574	124230	91976	91937	0.999576	73	59	55	1030	1763	3737	3.008	14161	104033	83.742	1687	145	8.711	108	631.25	117	386.607
1735	b0018P08	12,22,32,42,65,75,85	82974	138737	116205	113224	0.974347	37	40	94	176	3190	80217	57.819	80217	127626	91.991	1772	51	86.336	155	107.832	204	10.995
1736	b0018P12	22,36,48,58,6,66,85	82924	141497	126833	126490	0.997296	67	25	69	1828	5879	36531	25.818	46355	146984	103.878	2361	94	54.704	163	240.153	161	154.957
1737	b0019B11	2,22,28,46,63,66,81	82928	120686	136403	136292	0.999186	61	22	75	1520	4304	49524	41.035	49524	94689	78.459	2992	43	75.754	60	484.417	7	28
1738	b0019E17	14,37,50,53,7,72,81	82820	128189	125696	123451	0.982139	49	52	81	461	1797	12477	9.733	34631	93471	72.917	3949	72	64.872	187	236.588	64	12.312
1739	b0019F01	10,14,30,45,59,72,84	82244	125979	122423	122421	0.999984	61	24	75	1026	3124	8388	6.658	13484	74997	59.531	3215	49	56.856	71	764.972	4	9.75
1740	b0019F19	11,23,36,50,65,68,85	82252	128888	126681	126310	0.997071	61	35	75	587	3030	14872	11.539	25802	106060	82.288	7800	96	74.763	119	262.445	57	22.737
1741	b0019G23	26,39,46,60,68,7,83	82700	136154	74567	73468	0.985262	61	71	75	473	1272	3110	2.284	13570	90312	66.331	10549	173	59.502	240	224.696	52	23.327
1742	b0019J13	10,20,34,52,61,74,91	82868	115863	127738	125959	0.986073	43	18	94	786	6389	27448	23.69	41496	115015	99.268	1901	32	95.781	40	99.75	39	23.026
1743	b0019N03	2,22,38,50,58,75,88	83370	126911	100244	95179	0.949473	55	57	84	176	2437	99764	78.609	99764	138963	109.496	3920	43	80.586	159	147.013	108	11.694
1744	b0019O02	18,39,45,62,77,8,90	82568	124686	76583	76334	0.996749	61	38	74	376	1645	17748	14.234	20984	62532	50.152	2810	64	47.944	97	668.907	2	11
1745	b0019O06	17,37,40,6,65,73,90	82568	130354	84819	78292	0.923048	31	102	95	143	973	23083	17.708	26731	99342	76.209	3105	155	67.463	517	73.708	289	14.9
1746	b0019O19	24,27,41,53,6,76,84	83262	137260	110039	105504	0.958787	31	97	94	179	1260	12215	8.899	21675	122301	89.102	3028	130	77.052	341	75.695	367	15.496
1747	b0020C07	12,19,35,47,55,72,85	83024	122456	133746	133602	0.998923	73	33	60	1160	4918	26323	21.496	67760	162298	132.536	827	81	33.512	80	290.55	91	639.275
1748	b0020C13	1,17,36,45,57,72,90	83052	136348	122914	121820	0.991099	61	29	77	268	4549	47206	34.622	58353	131939	96.766	4167	60	91.85	87	117.632	37	23.757
1749	b0020G05	10,17,34,48,59,67,85	82762	131968	130033	129702	0.997454	61	19	77	565	6112	25186	19.085	49369	116139	88.005	3613	44	84.129	49	423.939	8	21.375
1750	b0020H08	12,18,30,48,59,76,86	82628	135027	124084	120889	0.974251	61	28	76	328	4607	42734	31.648	43705	129007	95.542	7672	74	84.927	88	227.159	6	60.5
1751	b0020I15	12,18,36,40,56,71,85	82678	125221	105309	102708	0.975301	37	56	92	165	1995	67106	53.59	67106	111722	89.22	1067	53	80.854	273	79.322	184	12.609
1752	b0020K10	1,22,31,41,65,77,90	83058	116794	120852	119678	0.990286	61	7	77	194	16881	67154	57.498	67154	118167	101.176	2379	19	95.632	22	231.864	0	0
1753	b0020K11	24,35,5,51,59,72,90	82818	129329	89756	89648	0.998797	73	50	58	918	2442	10122	7.827	34955	122108	94.417	1610	123	6.96	104	621.115	129	432.031
1754	b0020L18	1,17,28,47,61,70,87	82588	132349	124029	122284	0.985931	55	35	83	231	3513	30759	23.241	41666	122988	92.927	3402	50	86.286	60	279.283	104	13.394
1755	b0020N07	2,22,29,49,56,76,83	82912	151425	115129	114057	0.990689	61	34	76	284	3575	63642	42.029	63642	121581	80.291	5364	81	74.436	103	357.311	61	31.262
1756	b0020O11	13,16,28,49,53,66,88	82216	113670	111846	110418	0.987232	55	43	81	236	2154	46624	41.017	46624	92627	81.488	2665	53	73.261	62	458.452	162	12.16
1757	b0020P13	2,25,31,46,57,77,80	82076	122020	153396	153046	0.997718	49	18	92	470	6489	65531	53.705	65531	116807	95.728	1350	28	93.211	44	178.568	8	53.375
1758	b0021A11	14,29,5,50,64,71,84	82454	137054	144752	144470	0.998052	43	30	92	403	3796	19430	14.177	38162	113895	83.102	2166	52	81.609	113	218.195	10	54.9
1759	b0021A21	24,38,51,63,74,84,9	82928	131170	96212	95591	0.993546	61	34	73	556	2491	12515	9.541	18272	84715	64.584	3626	71	61.976	99	500.394	13	25.923
1760	b0021C06	23,36,46,53,7,70,84	82128	124618	108467	104364	0.962173	55	67	84	185	1803	28905	23.195	31602	120819	96.951	4293	95	85.184	218	65.009	319	13.455
1761	b0021D18	2,20,31,48,58,74,83	83960	131773	125560	125034	0.995811	37	19	95	203	6587	101087	76.713	101087	125170	94.989	816	26	93.314	83	103.735	4	50.25
1762	b0021D20	26,31,48,64,66,7,80	82442	149089	117036	116964	0.999385	73	67	59	1507	2174	3654	2.451	14365	145683	97.715	3341	171	16.101	132	503.5	151	388.225
1763	b0021E06	14,28,3,45,65,75,88	82876	121673	137926	137749	0.998717	79	32	53	1808	5617	16994	13.967	22431	179765	147.744	557	74	19.068	67	307.269	86	905.651
1764	b0021E18	24,3,39,48,64,74,91	82742	130779	135691	134399	0.990478	49	20	92	177	6549	71924	54.997	71924	130996	100.166	1083	23	96.683	43	73.977	79	14.646
1765	b0021E19	11,15,39,44,56,75,88	82530	136732	144506	144219	0.998014	67	35	68	1299	4425	80745	59.053	80745	154894	113.283	2132	130	58.305	107	337.243	113	185.186
1766	b0021G14	23,28,50,63,67,88,9	82480	133852	121188	119683	0.987581	61	7	76	23525	19178	32930	24.602	35142	134251	100.298	1823	27	98.606	29	58.172	13	13.769
1767	b0021G19	17,27,4,47,64,78,89	82432	141470	141535	140946	0.995838	67	37	68	1554	4646	93417	66.033	93417	171910	121.517	2986	128	50.492	88	522.125	119	202.454
1768	b0021H22	17,37,4,51,59,74,83	82342	132076	80158	76661	0.956374	43	51	88	176	1572	41614	31.508	41614	80193	60.717	1927	63	51.86	148	405.277	275	13.095
1769	b0021I14	22,32,49,6,60,78,90	82822	120168	142296	142099	0.998616	43	12	95	182	10551	65837	54.787	65837	126617	105.367	1536	14	96.67	33	109.727	10	38
1770	b0021I20	11,16,27,44,54,70,79	82442	118928	86645	80543	0.929575	31	90	95	140	1273	63332	53.252	63332	114657	96.409	2228	90	85.635	230	64.165	162	14.358
1771	b0022C24	20,28,44,55,7,74,88	82504	142194	132658	132303	0.997324	61	29	76	367	4343	39071	27.477	55586	125960	88.583	3311	59	86.503	68	282.206	1	2
1772	b0022D09	16,27,40,55,7,72,91	82808	131116	135668	135167	0.996307	61	15	77	666	8195	65129	49.673	65129	122939	93.764	3132	38	90.655	44	278.477	0	0
1773	b0022D13	26,29,42,65,7,72,89	83026	132436	178865	178744	0.999324	55	19	83	1751	6472	37990	28.686	42026	122986	92.864	2943	45	90.211	57	220.035	16	26.375
1774	b0022H23	12,16,39,42,64,66,87	82672	137510	69652	65690	0.943117	37	70	88	165	1256	20872	15.179	24189	87971	63.974	3045	104	56.581	414	136.423	164	19.677
1775	b0022I12	1,14,32,42,57,77,89	82922	129020	107512	104205	0.969241	55	63	84	256	1918	37247	28.869	38180	120880	93.691	8801	128	78.527	221	112.136	189	15.466
1776	b0022K16	19,30,42,55,69,84,9	82838	128505	141911	141542	0.9974	61	18	76	1258	6684	32308	25.141	45478	120327	93.636	4705	57	91.256	70	155.029	16	24.062
1777	b0022L16	24,28,45,62,66,7,83	82080	126281	141109	140686	0.997002	55	6	86	6810	21076	66767	52.872	66767	126457	100.139	1440	28	97.62	24	70.833	15	87.067
1778	b0022P07	16,33,45,65,67,7,90	82676	124884	122846	120710	0.982612	55	29	85	188	4381	30802	24.664	45908	127069	101.75	3856	50	93.51	89	48.326	181	21.017
1779	b0023F18	1,21,28,48,55,75,82	82496	130065	122577	121672	0.992617	37	43	91	589	2270	10552	8.113	18702	97627	75.06	2264	79	73.793	248	133.56	62	15.532
1780	b0023H04	25,35,51,60,75,8,83	82386	116161	138167	137412	0.994536	61	3	77	47174	38891	69317	59.673	69317	116673	100.441	1199	13	99.163	14	65.357	1	57
1781	b0023H10	17,2,29,51,57,73,86	82606	141315	120452	119176	0.989407	37	34	93	656	3179	26920	19.05	29422	108088	76.487	2263	64	73.626	199	178.347	74	24.041
1782	b0023N22	20,3,39,47,57,69,83	82872	126883	79222	75337	0.950961	49	82	80	200	1135	15515	12.228	33448	93148	73.413	2497	98	63.866	414	100.543	351	12.031
1783	b0024D06	2,23,32,42,53,78,91	82880	123082	118222	116515	0.985561	61	19	76	1515	6268	29680	24.114	40401	119093	96.759	4581	58	92.472	80	105.787	36	22.278
1784	b0024E22	16,29,44,5,61,67,88	82844	134250	107560	104155	0.968343	37	35	95	129	3484	63095	46.998	63095	121969	90.852	1063	49	87.253	116	128.578	162	13.568
1785	b0024F06	22,39,45,53,7,76,88	82258	129160	129101	127943	0.99103	43	19	95	171	6449	51036	39.514	51284	122537	94.872	1049	26	92.089	49	193	50	15.22
1786	b0024I22	18,27,49,58,67,89,9	82390	106927	147388	147292	0.999349	79	50	54	1512	3324	9303	8.7	27124	166224	155.456	1279	127	15.511	76	211.803	109	681.147
1787	b0024J02	12,15,31,47,63,66,82	82014	128389	99604	94179	0.945534	55	80	84	183	1590	18012	14.029	30631	127243	99.107	6586	103	80.441	135	151.126	344	13.689
1788	b0024J07	22,35,46,55,7,75,80	82748	130739	120623	117679	0.975593	43	22	92	181	5469	85724	65.569	85724	120336	92.043	1899	36	87.889	87	164.126	111	14.009
1789	b0024J08	25,29,45,60,7,74,87	83026	121260	110931	104149	0.938863	37	45	96	154	2868	116665	96.211	116665	129085	106.453	1655	38	94.462	97	41.619	245	10.931
1790	b0024N07	12,15,34,43,55,70,88	82702	133731	156879	156847	0.999796	73	74	59	1512	2598	4329	3.237	18156	192303	143.798	2391	200	19.506	166	157.199	207	393.966
1791	b0024N19	14,28,47,5,58,74,82	81732	121828	106201	105987	0.997985	49	27	81	595	2772	47533	39.016	47533	74865	61.451	1474	39	59.602	79	617.278	19	23.737
1792	b0025O05	13,23,35,49,65,70,90	83064	127581	113489	111872	0.985752	73	38	59	1388	4217	17469	13.692	30684	160255	125.61	1496	111	31.585	89	362.36	182	302.39
1793	b0026B14	19,29,52,62,72,82,9	83406	136937	145123	144774	0.997595	55	33	82	819	3522	70673	51.61	70673	116257	84.898	3941	70	76.622	137	221.46	47	35.596
1794	b0026B23	18,38,40,6,63,68,81	83246	120144	134427	129890	0.966249	55	47	84	178	2725	67101	55.85	67101	128087	106.611	3031	71	89.754	70	95.314	444	12.698
1795	b0026E14	11,22,36,40,60,70,83	82744	131091	104245	104055	0.998177	73	30	60	1275	4827	75649	57.707	75649	144811	110.466	1125	88	17.284	49	986.531	103	583.427
1796	b0026F07	12,22,36,41,63,76,80	82860	140523	122824	121640	0.99036	61	43	75	303	2808	64120	45.63	64120	120749	85.928	2436	63	82.959	80	290.488	45	15.733
1797	b0026F16	1,20,35,46,53,69,81	83460	143031	151170	151080	0.999405	61	26	75	1773	4429	12586	8.799	29396	115173	80.523	3802	53	77.543	75	428.107	1	12
1798	b0026G06	10,24,38,52,53,67,81	83200	123052	125031	124655	0.996993	55	32	84	229	3331	83832	68.127	83832	106597	86.628	2808	50	83.849	72	275.556	1	34
1799	b0026H05	22,3,36,45,62,74,81	82946	122292	122509	119431	0.974875	55	59	82	187	1963	67509	55.203	67509	115867	94.746	3257	65	83.53	83	218.012	175	11.697
1800	b0026H19	23,3,34,49,55,78,79	82534	128921	120132	116075	0.966229	37	46	91	334	2387	16975	13.167	20202	109828	85.19	2356	69	78.973	178	144.764	79	16.962
1801	b0026L04	21,29,42,5,60,70,85	82694	129762	107182	105041	0.980025	49	25	87	722	3246	10798	8.321	15985	81161	62.546	3266	45	59.649	69	758.13	2	24.5
1802	b0026L08	11,24,33,51,65,75,81	82824	135549	100387	94891	0.945252	49	79	91	173	1862	108754	80.232	108754	147160	108.566	1153	54	92.306	66	86.591	452	10.429
1803	b0027A23	24,35,40,65,7,71,84	81928	124217	142919	142524	0.997236	61	3	78	205	41686	124667	100.362	124667	125058	100.677	806	10	99.456	11	36.636	34	8.029
1804	b0027B08	12,16,33,50,54,71,88	83604	129295	120545	120303	0.997992	61	18	77	944	5618	25449	19.683	26385	101135	78.22	3261	49	75.624	59	526.831	13	33.385
1805	b0027C07	10,15,37,50,54,75,87	83182	131849	133885	133640	0.99817	37	39	90	805	2440	21793	16.529	26706	95161	72.174	1664	50	70.541	189	205.291	2	20.5
1806	b0027D04	10,25,39,52,64,75,85	82422	122485	120279	116218	0.966237	43	32	93	202	3870	37863	30.912	47904	123854	101.118	2611	44	92.008	84	75.5	194	17.768
1807	b0027D14	13,18,31,52,55,66,85	83518	124679	120895	116639	0.964796	55	29	85	187	4485	85609	68.664	85609	130084	104.335	3067	37	90.403	71	151.775	77	15.442
1808	b0027F08	21,27,51,54,7,75,88	82122	129353	120983	120973	0.999917	61	32	73	1836	2522	4715	3.645	7781	80721	62.404	6602	78	57.02	110	503.4	8	27.75
1809	b0027I07	14,3,31,41,57,66,81	82654	137070	111544	110306	0.988901	67	33	68	662	4433	25010	18.246	31077	146312	106.743	1655	101	55.552	138	228.362	94	312.883
1810	b0027I19	12,25,29,50,62,78,85	82950	133842	128340	126827	0.988211	43	27	94	195	4647	34989	26.142	45573	125471	93.746	1420	35	90.283	46	262.435	99	9.434
1811	b0027K09	15,36,45,55,66,8,91	82718	132085	160642	160620	0.999863	55	45	80	714	2337	8815	6.674	33089	105185	79.634	2821	71	76.785	99	304.727	8	61.875
1812	b0027L02	10,15,33,51,56,74,79	82092	139330	157453	157438	0.999905	49	34	88	902	3156	29126	20.904	32691	107322	77.027	1999	57	74.152	118	289.432	118	15.771
1813	b0027L17	12,16,28,48,63,73,91	83244	122519	127115	126474	0.994957	37	18	94	164	5907	95565	78	95565	106340	86.795	651	24	84.764	53	337.811	42	18.167
1814	b0027M18	24,29,4,45,59,71,81	82508	95469	106099	105767	0.996871	61	15	77	198	5749	70663	74.017	70663	86244	90.337	855	23	89.27	23	443	1	55
1815	b0027N16	11,17,31,40,57,69,89	83288	123459	44406	44248	0.996442	61	8	76	1211	4769	14964	12.121	15432	38156	30.906	3014	27	27.829	33	2699.49	1	18
1816	b0027O24	22,37,52,54,69,7,84	82820	127916	152285	151950	0.9978	73	30	61	2543	6522	19449	15.205	31079	195668	152.966	1467	94	40.188	57	79.281	93	774.086
1817	b0027P04	26,30,43,5,65,70,84	82412	137731	146877	146493	0.997386	61	5	77	10459	27561	73542	53.395	73542	137805	100.054	2309	26	97.341	27	135.63	0	0
1818	b0027P15	11,26,35,51,61,78,89	82056	152476	139690	137704	0.985783	61	15	75	481	8573	31284	20.517	54137	128598	84.34	4881	43	81.115	109	247.752	99	18.081
1819	b0028B24	12,20,38,40,65,74,80	82506	125175	82233	75625	0.919643	37	52	92	168	1948	38219	30.532	38791	101311	80.935	2596	66	73.017	164	192.091	164	13.86
1820	b0028E08	1,26,28,46,54,78,79	82830	129013	140845	139908	0.993347	61	28	75	681	4098	26862	20.821	38345	114756	88.949	2916	57	84.871	102	177.098	33	44.091
1821	b0028J16	21,39,47,58,6,72,89	82052	118036	127466	126618	0.993347	61	37	72	476	2704	12315	10.433	46301	100074	84.783	3661	67	80.808	91	246.407	12	19.25
1822	b0028K06	12,18,37,43,62,68,87	82508	127008	110616	107303	0.97005	61	19	75	644	6294	31468	24.776	42012	119593	94.162	3320	51	85.377	50	311.12	244	12.361
1823	b0029A15	18,34,40,5,62,74,89	82646	136008	114488	110148	0.962092	61	13	76	227	10684	78792	57.932	78792	138899	102.126	1883	23	93.861	40	181.75	80	13.488
1824	b0029C19	10,18,27,50,61,73,86	82762	122356	93729	83431	0.89013	49	54	89	180	2299	71978	58.827	71978	124160	101.474	2860	68	85.762	74	156.189	379	15.47
1825	b0029F07	11,18,27,51,64,66,83	83670	139409	154736	154508	0.998527	43	35	91	262	3559	35704	25.611	35954	124568	89.354	1990	56	83.977	68	289.632	93	28.419
1826	b0029F21	13,16,39,43,54,72,84	83036	121593	94799	86468	0.912119	61	28	74	228	4432	86489	71.13	86489	124098	102.06	2994	44	83.265	76	225.75	257	12.42
1827	b0029I11	25,39,4,46,59,78,90	82992	138751	144084	143286	0.994462	61	22	75	633	5877	51500	37.117	54579	129312	93.197	2481	53	91.229	90	130.889	15	26
1828	b0029I19	26,36,51,58,70,8,87	82942	120247	95373	91803	0.962568	31	52	98	143	2417	71683	59.613	71683	125690	104.527	978	32	96.692	55	41.309	180	9.478
1829	b0029M19	26,35,49,55,66,82,9	82472	124518	143235	141788	0.989898	55	21	85	175	6116	98898	79.425	98898	128447	103.155	651	13	99.113	21	22.429	47	13.468
1830	b0029O07	15,3,36,40,53,75,80	82998	127461	140721	140588	0.999055	61	24	77	209	4995	64975	50.976	64975	119897	94.066	2216	40	91.98	43	229.884	6	56.333
1831	b0031I11	22,36,51,54,71,89,9	83080	137134	158985	158712	0.998283	61	28	74	1200	4415	15301	11.158	51222	123625	90.149	4250	56	84.126	79	274.734	2	32.5
1832	b0031J05	17,28,3,49,54,69,81	83090	128771	134000	133573	0.996813	37	5	97	16397	25497	92643	71.944	92643	127487	99.003	1209	14	97.604	39	71.923	42	6.667
1833	b0031K15	21,3,38,41,56,70,83	82446	133993	91090	88443	0.970941	37	55	84	242	1553	9118	6.805	25998	85436	63.762	2941	89	59.733	212	248.906	85	13.965
1834	b0031M21	11,17,39,51,53,71,79	82462	128574	103641	103461	0.998263	49	31	82	630	2682	55312	43.02	55312	83171	64.687	2490	50	62.856	99	481.828	7	8
1835	b0032H19	19,39,40,6,61,76,85	83038	126438	105843	93708	0.885349	55	53	82	182	2151	25433	20.115	41370	114017	90.176	3342	80	86.274	94	158.372	93	26.538
1836	b0032M19	17,31,47,5,65,72,81	82930	126154	143535	141469	0.985606	55	44	82	233	2706	73556	58.307	73556	119106	94.413	4612	69	84.639	111	160.613	148	10.473
1837	b0033O04	24,27,43,59,75,8,91	82568	126548	78550	73900	0.940802	55	65	84	179	1970	72157	57.019	72157	128104	101.23	2905	67	89.115	69	157.609	238	12.185
1838	b0034B02	12,22,29,46,60,71,79	82504	122717	126522	126416	0.999162	67	47	66	781	2606	62656	51.057	62656	122483	99.809	1968	134	46.198	205	224.649	136	146.846
1839	b0034C03	13,21,32,46,63,70,80	82598	138386	155193	154955	0.998466	61	2	77	69516	69516	126021	91.065	126021	139033	100.468	1413	14	98.184	12	120.5	33	32.333
1840	b0034E11	23,29,40,56,77,9,90	82752	119181	118090	116653	0.987831	49	21	92	172	5492	46454	38.978	47370	115343	96.78	212	21	92.778	34	206.794	77	20.468
1841	b0035A16	21,27,49,5,61,76,81	82126	133262	87484	84218	0.962667	61	33	75	540	3021	52090	39.088	52090	99704	74.818	6238	85	66.363	159	274.447	42	28.286
1842	b0035B09	10,20,36,45,60,68,82	82686	124247	103895	101826	0.980086	61	15	76	202	8237	117315	94.421	117315	123557	99.445	856	19	96.708	16	206.625	66	11.879
1843	b0035B20	10,16,28,46,57,74,84	82288	124110	151993	151945	0.999684	79	56	54	1505	3418	8761	7.059	63769	191435	154.246	1280	131	19.514	97	180.619	106	777.085
1844	b0035H09	23,36,48,59,69,9,91	82958	119275	156429	156326	0.999342	79	48	54	1668	3391	12233	10.256	29564	162813	136.502	722	111	31.162	85	235.341	116	535.371
1845	b0035H20	22,31,45,5,64,75,91	83072	137203	111070	110624	0.995985	73	67	57	755	2125	16079	11.719	21539	142427	103.807	1744	165	31.585	199	223.477	209	236.34
1846	b0035I14	1,16,32,49,54,73,80	82712	117913	91449	91449	1	49	36	79	430	1418	7070	5.996	15344	51059	43.302	1267	46	41.965	127	538.504	2	20.5
1847	b0035J08	19,36,4,42,63,73,85	82816	117561	126560	125452	0.991245	43	16	95	173	7437	111233	94.617	111233	119003	101.227	336	9	98.094	58	27.103	2	334.5
1848	b0035N08	25,33,4,41,62,70,91	82560	136005	150418	150210	0.998617	37	12	97	2675	10676	64081	47.117	64081	128114	94.198	1328	27	93.066	122	74.246	29	12.828
1849	b0036B21	13,15,39,46,62,74,82	82690	131642	95901	91774	0.956966	61	39	75	396	3244	19197	14.583	41024	126528	96.115	5953	73	83.772	90	208.278	201	13.025
1850	b0036E01	10,18,32,52,65,71,83	82752	137975	157423	157134	0.998164	55	5	86	2182	27479	106554	77.227	106554	137397	99.581	2026	21	96.483	21	189.19	23	38.217
1851	b0036F23	1,20,33,40,54,75,90	82752	126031	129568	126528	0.976537	43	27	93	178	4581	61904	49.118	61904	123693	98.145	1200	28	93.928	56	121.018	88	9.943
1852	b0036G15	10,15,31,45,57,67,88	82976	131445	120856	116596	0.964751	55	58	83	192	2132	13035	9.917	34670	123688	94.099	5360	87	82.543	117	168.556	293	11.007
1853	b0036I18	21,35,49,63,7,77,91	82774	140503	114065	110448	0.96829	31	57	96	179	2174	83405	59.362	83405	123942	88.213	866	51	81.01	269	90.015	180	13.711
1854	b0036J16	16,27,3,49,56,74,90	82846	146758	153909	153391	0.996634	61	12	77	9269	12108	19244	13.113	46943	145306	99.011	6092	57	93.222	65	153.031	0	0
1855	b0036J24	15,3,33,44,61,71,87	82530	131914	129304	129026	0.99785	61	11	77	1739	10125	34840	26.411	47407	111385	84.438	2078	28	82.805	34	666.853	1	10
1856	b0036K05	10,16,35,41,60,66,85	83268	132139	116465	110729	0.950749	61	37	75	210	3665	20589	15.581	28326	135630	102.642	8367	91	87.468	139	106.173	153	11.778
1857	b0036K10	15,2,30,47,53,74,84	82412	126239	84824	84397	0.994966	61	27	74	1369	2895	10248	8.118	18907	78181	61.931	5692	76	56.767	97	558.979	14	25.429
1858	b0036L04	14,35,44,54,7,78,90	83144	132309	135498	128964	0.951778	55	51	85	182	2874	125196	94.624	125196	146623	110.819	2392	58	91.685	75	61.133	439	14.615
1859	b0036M09	17,32,40,54,74,8,87	83684	135037	138395	137914	0.996524	61	28	76	1411	4126	19221	14.234	39709	115544	85.565	5137	68	80.758	116	215.474	56	17.661
1860	b0036M11	16,36,5,52,64,72,89	82470	129532	140764	140464	0.997869	43	24	92	310	4524	21687	16.743	35366	108580	83.825	1324	33	80.755	82	294.037	20	40.85
1861	b0036N19	16,29,46,54,66,7,82	83504	120881	100823	97220	0.964264	49	53	88	193	2002	53837	44.537	53837	106110	87.781	2789	69	82.53	126	153.222	69	26.261
1862	b0036P14	17,30,44,5,59,75,79	83150	126338	117343	116940	0.996566	73	74	59	1519	2046	3422	2.709	11077	151446	119.874	2956	210	20.655	140	283.007	178	340.573
1863	b0037J09	12,18,31,51,65,73,88	82082	125061	110624	110538	0.999223	67	39	68	1395	2867	8427	6.738	32638	111814	89.408	1850	138	29.127	127	425.929	124	278.565
1864	b0037L09	11,18,38,45,65,72,79	83348	134118	140214	139014	0.991442	31	27	97	569	4738	32270	24.061	35691	127929	95.385	1843	50	90.831	251	40.351	100	21.69
1865	b0037N03	16,30,48,57,6,70,87	82662	121818	106788	105646	0.989306	61	12	77	346	9514	39081	32.081	48297	114176	93.727	1949	30	90.164	34	324.706	42	22.429
1866	b0037P13	20,28,42,5,62,75,81	82738	130489	121140	120134	0.991696	67	33	67	656	4311	77641	59.5	77641	142266	109.025	1060	103	52.013	108	403.287	119	160.193
1867	b0038A13	14,28,48,6,61,67,79	82990	127718	121659	120296	0.988797	61	10	77	602	12662	106299	83.229	106299	126621	99.141	1640	26	96.358	35	106.714	81	11.321
1868	b0038A15	20,35,40,61,72,8,86	83112	128405	149350	148446	0.993947	79	56	54	1807	3246	9164	7.137	26322	181801	141.584	3121	176	35.055	98	174.01	167	397.24
1869	b0038D01	22,29,3,50,59,69,80	82248	127730	105556	102272	0.968889	49	41	90	177	3175	93698	73.356	93698	130201	101.935	2690	59	90.342	136	58.985	241	17.9
1870	b0038D07	26,39,4,43,64,76,79	82788	149108	115585	113758	0.984193	55	40	84	182	3663	31633	21.215	36097	146548	98.283	2519	55	92.825	72	126.764	125	12.568
1871	b0038F04	21,37,44,55,70,89,9	82936	142554	139991	139578	0.99705	43	30	92	525	4072	65548	45.981	65548	122183	85.71	1332	46	83.948	148	152.466	11	28.909
1872	b0038F12	20,33,48,65,71,79,9	82714	127710	105352	103446	0.981908	31	40	98	142	2993	30578	23.943	46736	119728	93.75	1924	44	88.596	87	155.736	126	8.056
1873	b0038K07	20,3,38,44,64,72,81	83106	138141	82953	81212	0.979012	43	54	83	235	1422	13283	9.616	27544	76825	55.613	1562	71	53.739	120	524.017	63	16.254
1874	b0038K13	14,33,51,55,7,71,86	83230	128212	129892	129283	0.995311	31	33	97	558	3502	35203	27.457	37975	115595	90.159	2445	58	88.12	154	94.974	14	43.214
1875	b0038L06	14,32,50,55,73,9,91	82994	128945	132999	131682	0.990098	61	11	77	3373	11600	81041	62.849	81041	127608	98.963	3304	35	95.521	40	144.4	0	0
1876	b0039B14	24,37,45,6,61,72,91	83542	123195	59832	59794	0.999365	43	16	90	1172	2715	7829	6.355	21255	43450	35.269	1485	28	33.6	80	1017.01	15	29.4
1877	b0039H16	26,31,47,6,61,73,83	82824	138342	107189	104617	0.976005	61	50	72	398	2050	26910	19.452	27195	102502	74.093	6067	109	74.832	256	118.141	149	30.698
1878	b0039H22	17,36,40,55,68,79,9	82732	139880	105239	98547	0.936411	55	93	82	185	1376	9034	6.458	25609	128017	91.519	7039	166	69.906	395	84.8	551	15.608
1879	b0039M08	23,31,46,55,71,81,9	83378	123780	136165	136113	0.999618	61	45	73	668	2001	6877	5.556	17015	90084	72.778	4326	77	69.16	120	317.575	2	32.5
1880	b0040F21	11,24,39,43,62,70,80	82614	131371	97900	94399	0.964239	61	38	74	282	2997	26005	19.795	30379	113888	86.692	4421	78	76.619	113	248.389	99	26.747
1881	b0040H15	23,36,47,56,76,8,81	82640	126316	110847	108232	0.976409	49	50	87	192	2225	22759	18.018	51372	111285	88.1	3861	70	80.044	126	192.151	65	15.323
1882	b0041B22	20,39,50,53,6,74,87	82942	142386	108524	105395	0.971168	61	24	75	289	5911	101563	71.329	101563	141887	99.65	6227	55	85.016	97	204.361	56	27
1883	b0041D05	21,29,44,53,69,7,79	82530	130417	117397	117143	0.997836	31	32	95	748	3064	18538	14.214	39002	98049	75.181	1807	47	73.838	210	162.029	5	18.8
1884	b0041D08	16,3,38,43,57,67,86	82150	119990	117917	115519	0.979664	55	24	85	191	5118	55366	46.142	56982	122838	102.374	845	28	95.624	29	91.862	251	10.307
1885	b0041E21	14,35,43,6,64,72,80	82176	129998	101959	95023	0.931973	31	95	86	143	1166	18620	14.323	21529	110802	85.234	2458	109	73.534	565	51.804	408	12.588
1886	b0041F12	19,34,4,49,64,66,81	83554	128596	124553	119916	0.962771	37	70	92	218	1649	10121	7.87	23321	115473	89.795	4412	111	75.075	523	51.157	270	19.619
1887	b0041H21	24,39,5,50,57,73,85	82896	123378	143644	142638	0.992997	61	18	76	845	6592	34376	27.862	40614	118658	96.174	2641	37	93.449	44	175.341	25	14.72
1888	b0041I07	10,24,35,43,61,76,88	83306	128310	103642	99886	0.96376	61	21	75	192	6306	44302	34.527	64482	132433	103.213	3231	36	93.31	35	207.829	150	8.733
1889	b0041L03	17,2,30,41,63,70,88	83600	122490	138714	138568	0.998947	61	23	75	965	4778	23257	18.987	31134	109899	89.721	3022	49	87.156	71	221.521	2	2.5
1890	b0041M18	14,2,39,51,63,75,87	82952	132907	112475	109843	0.976599	61	25	76	379	5069	37848	28.477	53231	126727	95.35	4690	54	88.641	47	302.362	64	13.844
1891	b0041O12	14,29,40,60,76,8,88	82628	145006	149282	149182	0.99933	43	30	89	1699	3253	9420	6.496	18688	97603	67.31	607	42	65.846	152	320.48	69	11.783
1892	b0042C14	2,26,28,47,57,71,89	83352	126549	144321	144281	0.999723	49	36	86	955	2536	7249	5.728	27793	91309	72.153	1526	47	70.919	96	383.354	0	0
1893	b0042E18	13,25,37,49,61,73,85	82546	110766	136296	135967	0.997586	61	21	75	1017	5032	27578	24.898	31360	105682	95.41	4205	49	89.775	59	187.441	13	20.538
1894	b0042G17	25,27,40,64,73,8,80	83338	129357	126764	124146	0.979347	49	44	88	185	2720	32576	25.183	32919	119710	92.542	3782	58	84.982	59	298.576	173	10.468
1895	b0042L11	13,17,36,44,54,66,80	83426	126358	121322	121286	0.999703	49	31	88	854	2500	10492	8.303	32751	77523	61.352	848	39	60.48	84	592.56	6	27
1896	b0043A10	1,26,30,52,53,72,83	82878	128693	129583	128717	0.993317	55	38	81	1137	3065	10367	8.056	15603	116480	90.51	8040	124	81.746	200	102.955	62	46.79
1897	b0043F05	18,3,36,44,55,69,86	83646	132316	162875	162710	0.998987	61	14	76	376	8823	98179	74.2	98179	123533	93.362	2256	29	88.237	63	246.587	1	29
1898	b0043F07	21,34,45,54,6,74,79	82490	128373	129121	126384	0.978803	61	21	76	200	6168	109807	85.537	109807	129536	100.906	2811	30	94.282	42	162.095	32	16.656
1899	b0043G14	23,3,31,40,63,74,86	83380	124632	146351	146076	0.998121	61	17	76	2020	6485	27740	22.258	49171	110259	88.468	4123	46	85.055	53	351.34	1	5
1900	b0043H03	2,20,32,51,64,71,85	82640	120952	163635	163546	0.999456	61	25	74	1019	4475	20952	17.323	44915	111892	92.509	3848	53	89.223	71	183.465	3	3
1901	b0043H13	2,24,29,43,53,72,87	82780	123223	127374	125276	0.983529	79	25	54	2080	6687	39696	32.215	48934	167196	135.686	1483	84	49.67	76	134.289	84	616.81
1902	b0044C01	15,2,29,44,60,77,82	82296	136947	94628	89668	0.947584	55	87	84	181	1620	70881	51.758	70881	141015	102.97	6036	110	86.412	100	140.17	342	13.424
1903	b0044E13	12,26,37,45,63,78,90	82634	141987	140564	139935	0.995525	37	35	93	277	3638	34341	24.186	38809	127341	89.685	2627	66	86.149	234	73.077	138	18.601
1904	b0044E23	20,33,45,56,6,66,88	83468	134561	89616	87301	0.974168	55	54	81	244	1667	52060	38.689	52060	90037	66.912	4781	98	61.619	135	371.074	70	22.157
1905	b0044G03	12,18,33,44,64,67,79	82854	135553	150532	150292	0.998406	55	2	86	67793	67793	109077	80.468	109077	135587	100.025	1211	12	99.029	17	74.294	1	53
1906	b0044G15	14,38,4,50,63,77,79	81434	139424	77121	61801	0.801351	55	47	80	560	1439	3461	2.482	6909	67660	48.528	4841	85	44.533	116	664.724	8	28.25
1907	b0044L13	22,27,48,59,7,73,90	82484	121673	114769	110755	0.965025	43	30	93	185	3808	43239	35.537	50503	114258	93.906	1043	28	90.682	57	188.561	54	10.907
1908	b0044N11	21,32,41,61,66,8,82	83816	119574	120515	120389	0.998954	61	29	73	928	2876	44348	37.088	44348	83427	69.77	3984	54	66.124	79	512.532	2	8.5
1909	b0045K17	18,38,4,51,57,69,87	82984	124688	108114	105233	0.973352	55	40	85	175	3305	88706	71.142	88706	132201	106.025	1980	33	92.093	36	231.361	104	14.712
1910	b0045L14	10,24,36,46,54,73,90	83214	136270	140549	137403	0.977616	61	13	76	246	10830	94941	69.671	94941	140797	103.322	2732	37	97.628	33	45.939	153	11.216
1911	b0045N16	12,25,30,40,55,75,87	82962	125429	109615	105303	0.960662	37	44	93	161	2821	28203	22.485	53148	124126	98.961	1290	48	92.329	92	81.793	157	13.357
1912	b0046J17	1,25,28,49,62,67,90	82864	124017	121837	117899	0.967678	37	54	94	221	2147	40275	32.475	43422	115985	93.523	1106	65	86.287	102	140.706	113	23.487
1913	b0046L15	21,29,3,40,54,71,91	82568	128586	125246	125042	0.998371	61	27	75	663	3816	26489	20.6	26786	103037	80.131	4283	65	76.791	121	241.868	33	17.515
1914	b0047C22	20,38,48,63,7,70,82	82798	114471	133066	132886	0.998647	61	27	76	1247	3846	60146	52.543	60146	103846	90.718	3807	56	87.42	69	208.696	0	0
1915	b0047F05	11,18,30,47,56,70,89	82728	137962	74849	67473	0.901455	37	61	91	159	1519	57026	41.335	57026	92674	67.174	622	57	71.537	218	162.014	339	11.649
1916	b0047G06	19,2,27,52,55,75,86	82970	125968	104027	100655	0.967585	43	46	92	174	2665	101658	80.701	101658	122595	97.322	800	34	90.954	64	155.391	145	10
1917	b0047J07	26,28,40,62,68,8,84	83468	120061	128350	126065	0.982197	61	19	75	528	5836	80220	66.816	80220	110884	92.356	2673	41	87.894	46	291.217	69	16.493
1918	b0047M13	25,27,51,58,6,74,86	82918	118433	166532	166430	0.999388	61	21	74	1592	5285	29974	25.309	43121	111002	93.726	3434	47	90.637	64	172.359	4	14.5
1919	b0048E02	13,21,29,50,58,66,87	83126	121867	126757	125682	0.991519	37	19	96	228	6253	94321	77.397	94321	118814	97.495	1413	26	93.585	53	130.453	28	32.286
1920	b0048G04	1,15,36,51,60,76,86	83208	116575	127529	127471	0.999545	79	43	53	1889	3316	5639	4.837	35545	142608	122.332	2064	112	19.725	79	445.076	95	614.937
1921	b0049B14	23,3,38,48,53,66,87	82850	134059	99492	96292	0.967837	55	62	84	180	2050	65663	48.981	65663	127135	94.835	5290	82	80.744	99	232.687	264	10.523
1922	b0049B24	13,20,28,50,60,71,83	83764	130886	111465	107519	0.964599	25	55	98	176	2315	14151	10.812	31574	127326	97.28	2898	73	90.036	189	56.323	120	19.967
1923	b0049E21	1,18,34,49,63,76,88	82906	127210	109853	106851	0.972673	61	29	71	566	3877	80658	63.405	80658	112438	88.388	3626	46	78.79	89	296.607	59	9.881
1924	b0049E24	2,25,30,43,64,67,91	83052	136944	106074	105965	0.998972	55	19	82	766	4257	57406	41.919	57406	80897	59.073	1460	33	57.396	46	1255.89	10	57.3
1925	b0049F24	17,35,48,56,7,72,83	82148	135934	109492	107693	0.98357	43	32	92	248	3179	29928	22.017	39955	101729	74.837	1759	46	72.342	133	274.15	54	21.019
1926	b0049I03	11,15,27,47,62,72,90	82800	126499	144488	144399	0.999384	61	25	74	448	4183	25955	20.518	27417	104588	82.679	2043	43	80.564	61	395.557	3	152.333
1927	b0049J22	19,2,30,48,60,66,79	82672	121003	141309	141154	0.998903	73	6	60	13091	22779	76188	62.964	76188	136678	112.954	791	23	76.739	20	335.05	10	2144.6
1928	b0049K11	1,26,34,51,64,73,91	82262	130259	93542	85886	0.918154	25	55	99	177	2166	27465	21.085	53256	119172	91.488	3449	82	83.835	251	80.673	28	28.821
1929	b0050A17	1,15,33,42,55,72,80	82510	126034	131128	130983	0.998894	55	12	85	674	9454	28721	22.788	42910	113454	90.019	455	19	89.439	23	565	7	45
1930	b0050B04	24,29,47,6,65,70,88	82760	136621	134144	133504	0.995229	43	37	91	278	3154	23305	17.058	35989	116706	85.423	1883	57	81.553	70	329.786	32	66.188
1931	b0050D20	13,18,36,41,59,77,82	82916	135298	117631	117295	0.997144	61	21	75	2261	5149	13297	9.828	27101	108147	79.932	5369	68	76.944	106	294.283	0	0
1932	b0050F04	21,34,48,63,66,83,9	82490	131533	70137	69665	0.99327	73	61	55	414	1499	5942	4.517	16619	91482	69.551	1058	236	22.387	523	119.059	233	170.897
1933	b0050F05	2,21,37,50,60,67,84	82602	128780	60104	51562	0.85788	37	83	82	154	1032	17713	13.754	19488	85693	66.542	2543	102	56.68	356	146.312	292	12.675
1934	b0050G21	13,21,39,41,53,75,81	82838	113803	95137	91154	0.958134	37	62	87	376	1430	10971	9.64	20298	88687	77.93	2743	87	70.871	212	143.637	191	14.131
1935	b0050L14	1,24,37,40,59,68,80	82594	136985	142926	142691	0.998356	55	31	84	687	3790	24697	18.029	36432	117503	85.778	3674	69	82.339	94	244.936	29	40.31
1936	b0050P06	23,30,43,62,74,79,9	83364	135165	103014	101336	0.983711	43	33	94	180	4049	42085	31.136	51776	133641	98.872	864	35	90.793	63	120.714	161	30.056
1937	b0050P12	19,32,48,54,76,88,9	82846	120514	104536	103044	0.985727	55	60	75	408	1379	5097	4.229	30937	82748	68.663	4127	82	61.556	140	323.8	93	10.742
1938	b0050P16	13,14,39,49,57,76,80	83160	129094	137380	137162	0.998413	73	37	60	1414	4986	21087	16.335	52885	184512	142.928	548	86	25.649	54	387.593	69	1087.72
1939	b0051J07	10,19,35,45,62,73,91	82650	141430	129453	127947	0.988366	43	14	95	176	10167	100079	70.762	100079	142349	100.65	406	10	98.659	17	92	23	14.435
1940	b0052D06	10,23,39,45,54,66,81	83132	149037	181765	181672	0.999488	61	26	76	1896	5262	21492	14.421	47696	136817	91.801	3962	55	88.964	84	195.798	0	0
1941	b0052F16	21,32,52,55,6,67,88	82946	162076	125185	120757	0.964628	61	39	75	263	4016	44234	27.292	49192	156639	96.645	5178	82	89.339	134	109.03	234	11.406
1942	b0053B18	26,37,42,54,73,86,9	83246	141507	115936	114159	0.984673	49	30	92	174	4643	90555	63.993	90555	139315	98.451	849	24	93.521	70	109.929	144	10.229
1943	b0053B20	17,30,45,6,62,68,89	83138	146933	122235	119983	0.981576	61	18	76	242	8189	49813	33.902	54418	147418	100.33	2061	38	96.147	29	149.931	91	14.429
1944	b0053D24	12,20,30,42,56,72,90	82528	145259	123743	120630	0.974843	49	37	92	182	3862	77139	53.104	77139	142915	98.386	1409	38	94.387	62	118.323	36	22.694
1945	b0053F06	17,38,42,5,55,77,82	81958	140154	88422	80731	0.913019	61	52	72	223	2638	17847	12.734	29486	137226	97.911	6581	96	79.396	158	154.911	206	21.364
1946	b0053H04	2,22,36,44,59,68,84	82796	144394	146939	146481	0.996883	37	20	96	1497	6766	40126	27.789	41764	135331	93.723	2359	54	91.34	104	109.385	37	30.486
1947	b0053L18	11,23,39,46,57,72,91	83472	166665	144680	141944	0.981089	79	27	52	1788	8177	41117	24.67	51241	220793	132.477	3138	121	34.166	95	328.147	97	809.784
1948	b0053N18	2,26,31,43,62,75,82	83156	168410	115492	111660	0.96682	43	36	92	260	4184	20467	12.153	29790	150626	89.44	2462	50	84.149	75	324.613	208	11.293
1949	b0054A02	13,22,35,52,60,72,88	82808	150302	98666	95524	0.968155	61	43	75	270	3163	33908	22.56	47832	136029	90.504	4126	87	86.057	102	188.167	85	20.753
1950	b0054A12	17,37,5,52,62,67,80	82430	132372	139866	139576	0.997927	37	13	96	161	9005	63460	47.941	63460	117071	88.441	256	20	87.925	39	399.872	3	129.667
1951	b0054I08	2,25,35,45,55,78,88	82730	142802	102692	102301	0.996192	73	39	60	1031	3988	17236	12.07	25967	155569	108.94	2064	107	15.748	79	711.759	98	653.929
1952	b0054J02	25,30,48,53,7,71,89	83110	129616	165150	165039	0.999328	49	16	91	1132	7610	27485	21.205	57460	121770	93.947	1031	27	93.088	52	172.058	2	6
1953	b0054J23	10,19,30,43,58,75,81	83314	139512	132726	131171	0.988284	73	42	60	1040	3661	28509	20.435	54515	153768	110.218	929	122	52.898	157	168.675	172	228.087
1954	b0054K10	22,34,4,40,53,73,87	83086	145467	116871	116309	0.995191	55	28	83	650	4022	15735	10.817	26567	112626	77.424	6305	86	73.23	127	303.394	9	45.556
1955	b0054K15	24,31,41,54,7,70,89	82650	128767	98279	96014	0.976953	55	52	84	183	2326	31105	24.156	35764	120962	93.939	4128	64	84.974	75	242	106	11.311
1956	b0054M04	12,19,38,43,60,76,91	83112	148547	169383	169109	0.998382	61	21	76	1047	6485	86661	58.339	86661	136205	91.692	1669	38	90.402	52	272.692	2	39
1957	b0054M12	13,25,30,41,58,68,84	83064	158486	96572	95500	0.988899	61	59	74	435	1802	24009	15.149	35201	106319	67.084	8203	149	62.955	225	252.569	92	20.467
1958	b0054M17	10,20,32,46,62,67,87	81808	118456	133062	132220	0.993672	61	15	76	881	7539	63584	53.677	63584	113089	95.469	2216	25	91.778	30	320.6	10	12.2
1959	b0055C04	10,16,34,51,54,69,83	82806	145980	128637	128511	0.99902	43	43	85	1056	1963	5031	3.446	10811	84431	57.837	1279	60	56.576	198	317.869	13	34.846
1960	b0055E14	16,33,4,42,56,75,86	83240	149855	129240	126346	0.977608	49	32	92	174	4828	87104	58.126	87104	154509	103.106	2750	35	96.097	41	95.488	165	11.721
1961	b0055E15	26,39,48,53,67,9,90	83080	123363	129476	129398	0.999398	61	25	75	1018	4153	15458	12.53	25977	103848	84.181	5264	65	79.791	91	273.484	3	14.333
1962	b0055M02	10,15,38,40,60,72,89	82512	133620	160601	160471	0.999191	49	14	90	316	8829	115119	86.154	115119	123608	92.507	1050	24	91.529	47	237.319	1	165
1963	b0056I03	26,31,4,45,55,74,89	82584	141285	74922	66677	0.889952	55	112	82	178	1258	30583	21.646	40119	140956	99.767	5339	123	73.009	262	111.939	683	12.893
1964	b0056I11	12,23,27,50,53,75,90	82770	149853	162747	162324	0.997401	49	48	86	779	2460	16838	11.236	26195	118120	78.824	2752	72	77.089	158	216.196	4	43.5
1965	b0056K07	17,35,50,62,71,9,90	81772	132494	148033	147393	0.995677	67	36	68	1450	4749	19598	14.792	40100	170965	129.036	3958	141	56.101	142	135.07	152	256.467
1966	b0056M02	13,16,37,50,55,78,80	82960	150321	140860	140551	0.997806	55	24	83	2245	4542	10479	6.971	30899	109023	72.527	4482	59	69.485	83	552.651	0	0
1967	b0056M05	13,23,39,48,63,71,85	82648	143888	103865	103679	0.998209	61	50	68	619	1568	4742	3.296	16321	78417	54.499	6162	96	49.209	151	483.166	6	20.667
1968	b0058B10	12,19,28,52,65,67,84	82900	142190	145364	145132	0.998404	43	20	94	794	6213	64654	45.47	64654	124274	87.4	1218	35	84.677	59	341.339	36	45.806
1969	b0058B24	11,24,36,47,57,66,87	82946	164417	131069	128647	0.981521	31	49	97	163	3149	36899	22.442	44285	154312	93.854	2072	49	88.245	98	177.357	166	11.729
1970	b0058D06	10,22,30,47,60,69,87	83074	147718	126838	124262	0.979691	37	40	92	364	2922	28407	19.231	44396	116893	79.133	2179	58	74.343	173	213.873	48	18.75
1971	b0058D08	22,37,4,49,58,77,80	83048	141022	163612	163363	0.998478	61	26	76	1555	4931	32866	23.306	44167	128218	90.921	4868	70	87.303	88	195.409	38	18.658
1972	b0058F20	13,14,33,44,60,68,81	83430	144289	131567	131200	0.997211	61	44	75	578	2282	10519	7.29	21574	100441	69.611	4361	90	66.758	142	320.606	63	38.714
1973	b0059A23	20,30,4,47,58,76,88	82750	162800	103657	99597	0.960832	55	81	84	189	1931	37661	23.133	42812	156476	96.115	10178	137	81.737	166	157.193	331	10.991
1974	b0060B07	11,25,29,49,59,72,88	82770	152917	159201	154508	0.970522	31	47	97	190	3275	52700	34.463	68156	153971	100.689	2567	55	91.625	259	41.093	110	19.673
1975	b0060E06	12,18,35,50,63,74,83	83190	159358	101905	101577	0.996781	61	48	72	511	1962	8867	5.564	31834	94197	59.11	4926	94	56.145	145	481.345	4	22.75
1976	b0060G12	15,2,36,52,63,69,83	82272	108952	109092	107331	0.983858	61	16	76	381	6592	72045	66.125	72045	105475	96.809	2195	26	92.777	30	252.667	23	12.609
1977	b0060O16	12,22,35,51,57,66,91	82598	164358	183644	183530	0.999379	49	27	89	1375	5598	25411	15.461	51070	151148	91.963	2414	46	90.102	108	148.194	7	37.571
1978	b0062B04	19,27,43,54,6,73,87	82970	163426	153741	153518	0.99855	55	23	85	1042	6370	33717	20.631	39637	146515	89.652	3157	48	87.507	84	239.905	1	264
1979	b0062D08	16,38,49,62,77,81,9	82914	153240	134316	133337	0.992711	61	18	77	192	7897	83596	54.552	83596	142151	92.764	2190	39	90.371	50	286.48	61	7.082
1980	b0062F14	16,33,44,6,62,74,80	82684	159083	130954	128157	0.978641	31	48	98	140	3214	88948	55.913	88948	154290	96.987	397	34	92.563	80	139.025	49	14.469
1981	b0062F24	1,26,27,43,61,68,90	83248	184410	169886	169762	0.99927	55	25	83	1099	5906	74728	40.523	74728	147652	80.067	2894	54	77.945	74	543.595	14	31.786
1982	b0062H16	11,14,38,44,58,67,84	83070	123115	87728	80841	0.921496	31	92	97	131	1431	41773	33.93	50772	131659	106.94	2999	79	89.153	141	66.411	305	13.082
1983	b0062H18	13,23,32,40,60,66,84	83122	166359	162197	162191	0.999963	49	27	90	2160	4164	10566	6.351	22476	112436	67.586	1692	42	66.14	94	595.245	8	47
1984	b0062J02	12,26,31,40,53,70,91	82456	162781	166120	165963	0.999055	43	33	92	1124	3826	16595	10.195	34727	126259	77.564	1667	50	75.759	107	359.336	23	43.957
1985	b0062N08	25,33,42,5,65,76,88	83372	160320	111723	108287	0.969245	43	55	92	181	2732	43273	26.992	55541	150267	93.729	1588	54	89.241	93	169.194	133	11.383
1986	b0062N12	26,32,4,48,61,71,91	83492	99885	128549	128283	0.997931	61	20	75	802	4640	26387	26.417	33824	92814	92.921	3176	42	88.735	73	153.877	2	9.5
1987	b0062N22	10,20,27,44,58,69,90	83282	181574	67879	67582	0.995625	67	63	58	481	1273	3597	1.981	13044	80249	44.196	3195	322	23.497	1192	95.386	760	33.171
1988	b0062P14	10,18,38,44,62,66,82	82246	168224	86682	76706	0.884913	49	119	89	175	1575	51169	30.417	60623	187461	111.435	4293	110	90.662	127	63.402	605	12.656
1989	b0063A06	11,25,28,46,53,75,86	82504	185042	124196	122681	0.987802	61	33	75	376	4445	85287	46.091	85287	146693	79.276	5171	70	72.762	81	614.605	62	9.984
1990	b0063F19	19,28,48,53,69,8,83	82710	169136	128151	124667	0.972813	31	48	99	146	3634	79931	47.258	82753	174448	103.141	1987	44	96.85	138	23.522	145	14.352
1991	b0066L10	22,39,43,5,60,77,81	83380	169968	135223	132453	0.979515	61	48	72	646	3016	15338	9.024	47126	144808	85.197	5482	93	80.054	125	261.888	80	14.575
1992	b0066P14	18,34,43,58,66,8,80	83140	152024	111772	107259	0.959623	49	81	87	224	1699	30990	20.385	44638	137619	90.525	5544	112	76.268	218	147.624	322	12.102
1993	b0067A16	12,17,35,40,58,76,81	83040	162378	140995	139043	0.986156	61	10	76	234	16415	150277	92.548	150277	164157	101.096	1605	19	98.733	34	44.324	31	17.742
1994	b0067A23	20,27,43,55,76,80,9	81554	184609	128745	128477	0.997918	25	74	97	239	1802	20785	11.259	47284	133389	72.255	2869	100	70.384	354	153.201	12	36.75
1995	b0067B19	26,30,45,58,69,7,91	83474	179851	135315	133511	0.986668	37	47	94	176	3389	26946	14.982	73173	159297	88.572	1297	51	84.811	155	166.613	76	19.645
1996	b0067C02	10,14,35,47,63,70,81	82898	150741	180143	180040	0.999428	43	29	91	1010	4671	39331	26.092	42454	135462	89.864	916	41	88.519	112	149.027	11	55.909
[truncated: 202 more rows]

## Sheet: Rice-Perfect Decon (BAC-by-BAC)
Rice Perfectly Deconvoluted BAC Assemblies - Velvet
Kmers: 25-79, step 6 Kmer chosen by largest n50 Insert size: 327 Expected covg: 57.43
BAC Data					Assembler Data											Blast Data
BAC id	Address	BAC Signature	BAC Size	Reads Deconv	K	Cnt	Used	Med	Mean	n50	n50/Sz	Max	Sum	Sum/Sz	Ns	HSPs	Covg	Gaps	AvgGap	Overlaps	AvgOvr
1	a0001A06	1,16,34,42,53,67,84	150885	82362	61	4	74	2431	37273	144071	95.484	144071	149094	98.813	346	12	97.803	39	24.846	62	37.839
2	a0001A14	18,33,4,49,53,71,90	129185	82946	55	4	82	124	30701	122437	94.776	122437	122806	95.062	234	12	97.934	25	76.44	47	16.128
3	a0001B10	21,30,49,65,78,88,9	139706	82382	61	3	74	57742	46545	81753	58.518	81753	139636	99.95	239	14	99.325	11	13.182	11	72.545
4	a0001B12	21,3,31,46,53,78,82	160400	83056	49	45	88	174	2801	27695	17.266	42840	126079	78.603	1911	86	63.815	276	201.014	79	32.405
5	a0001B21	23,39,42,58,7,74,90	143728	82546	43	9	95	145	15839	129258	89.932	129258	142555	99.184	1035	17	94.657	50	135.48	76	11.921
6	a0001C05	17,27,48,5,54,71,86	153024	82858	61	6	75	6126	24770	99565	65.065	99565	148620	97.122	645	28	97.401	45	1.467	225	17.382
7	a0001C15	13,17,37,47,60,76,82	146283	82520	61	1	75	146235	146235	146235	99.967	146235	146235	99.967	0	1	99.963	20	2.7	0	0
8	a0001D02	25,39,47,5,62,71,87	147696	82236	49	10	88	1359	14193	124193	84.087	124193	141932	96.097	400	29	93.831	97	77.402	65	24.662
9	a0001D07	1,16,28,50,56,72,85	155116	82392	49	1	89	155282	155282	155282	100.107	155282	155282	100.107	292	6	99.517	20	33.65	4	19
10	a0001D11	23,37,47,5,53,68,79	106135	83136	49	4	89	9355	26244	86148	81.168	86148	104976	98.908	151	6	92.48	13	589.231	4	80.25
11	a0001D19	23,39,41,55,6,68,80	164838	82356	61	2	75	81994	81994	163867	99.411	163867	163988	99.484	46	6	99.783	7	5.286	6	53.5
12	a0001D21	22,28,4,48,56,78,88	164648	81826	61	1	74	164706	164706	164706	100.035	164706	164706	100.035	69	3	99.931	3	4.333	2	50.5
13	a0001D23	1,24,33,41,61,67,85	136977	82370	61	2	74	68309	68309	136497	99.65	136497	136618	99.738	96	6	99.409	6	115.167	2	59
14	a0001F20	23,34,4,50,58,71,89	156034	82616	55	1	82	155455	155455	155455	99.629	155455	155455	99.629	70	4	98.125	26	103.115	1	244
15	a0001H02	21,29,43,6,63,76,82	141018	82870	37	8	99	210	17283	120157	85.207	120157	138266	98.048	891	23	94.047	98	68.582	43	38.93
16	a0001H06	11,19,37,52,64,73,79	120455	82214	49	3	89	5632	39641	113016	93.824	113016	118924	98.729	1242	7	68.515	22	1719.91	1	87
17	a0001H09	25,27,52,61,67,7,83	146755	83780	55	1	82	146773	146773	146773	100.012	146773	146773	100.012	255	4	99.869	5	2.2	9	20.111
18	a0001H14	13,15,32,51,59,69,81	141620	82692	31	3	99	133	46249	138500	97.797	138500	138748	97.972	388	10	94.038	125	65.472	5	51.8
19	a0001H20	13,16,35,44,56,71,89	182516	83236	61	1	74	182626	182626	182626	100.06	182626	182626	100.06	204	6	99.532	8	60.75	20	18.45
20	a0001I05	10,15,35,44,55,68,83	149762	83484	37	9	98	234	16721	142862	95.393	142862	150497	100.491	1776	26	94.745	132	51.523	29	36.862
21	a0001J13	10,20,29,50,57,76,81	143106	83136	55	8	82	4547	17643	112316	78.484	112316	141145	98.63	121	15	93.955	43	195.791	13	17.846
22	a0001J23	23,32,46,6,65,76,79	143444	82938	37	6	99	146	23402	139357	97.151	139357	140414	97.888	179	13	95.402	28	219.071	7	65.857
23	a0001L16	11,17,28,44,65,78,83	162958	83464	55	1	83	162442	162442	162442	99.683	162442	162442	99.683	50	8	99.014	6	102.5	83	11.94
24	a0001M03	2,24,32,52,58,76,80	151139	83154	61	4	75	26297	37207	95880	63.438	95880	148830	98.472	373	10	94.487	54	136.222	28	34.857
25	a0001M14	17,2,27,45,58,66,82	156438	82826	55	1	82	156334	156334	156334	99.934	156334	156334	99.934	20	5	99.909	5	3.8	5	24.8
26	a0001M19	19,29,51,59,66,8,85	168596	82656	49	4	89	7631	41968	152398	90.392	152398	167875	99.572	731	13	99.069	31	30.581	21	29.571
27	a0001N13	10,24,28,48,58,71,87	147387	82666	61	4	74	736	36872	145879	98.977	145879	147488	100.069	202	7	97.787	33	92.97	3	64.333
28	a0002A04	20,31,4,50,64,73,90	160787	82238	55	1	82	155322	155322	155322	96.601	155322	155322	96.601	30	6	99.238	8	134	3	51.333
29	a0002A14	24,38,48,54,6,69,80	170103	82854	49	11	89	491	14963	94001	55.261	94001	164598	96.764	427	29	96.681	78	18.641	208	20.154
30	a0002A20	11,15,35,45,58,74,80	157421	82466	55	4	82	11237	39147	133837	85.019	133837	156591	99.473	499	17	98.09	153	11.248	26	49.423
31	a0002B06	23,34,52,6,64,70,83	163769	82614	55	5	82	162	31348	84054	51.325	84054	156740	95.708	50	13	97.241	35	119.771	8	40.875
32	a0002B19	19,35,42,53,68,7,87	167257	82998	37	7	98	11839	23205	101933	60.944	101933	162439	97.119	1077	24	94.377	98	78.939	127	13.142
33	a0002C23	16,27,5,51,62,73,84	147374	82172	49	1	89	147407	147407	147407	100.022	147407	147407	100.022	114	2	99.944	7	11.857	0	0
34	a0002D18	18,33,41,55,75,88,9	145518	82726	55	1	82	145455	145455	145455	99.957	145455	145455	99.957	134	7	99.638	6	30.167	6	57.667
35	a0002E02	23,34,40,54,7,76,80	140339	82580	61	6	74	1703	22768	90030	64.152	90030	136612	97.344	581	19	93.005	108	66.37	195	13.585
36	a0002E08	20,27,42,65,70,8,83	138519	82444	61	1	74	138493	138493	138493	99.981	138493	138493	99.981	175	2	99.852	6	34.167	0	0
37	a0002E19	24,34,4,47,63,69,91	127277	83320	49	6	89	15101	21067	69397	54.524	69397	126407	99.316	330	17	96.253	130	10.615	289	11.727
38	a0002E21	24,27,42,56,69,7,81	151154	83026	55	7	82	2157	20233	121637	80.472	121637	141633	93.701	757	14	97.061	59	59.61	41	22.585
39	a0002E22	1,14,39,50,60,69,90	163374	83304	49	10	89	195	15738	145169	88.857	145169	157387	96.335	558	24	92.003	87	138.448	57	17.895
40	a0002F02	20,29,48,64,77,8,87	157034	82822	55	4	82	5359	39177	145862	92.886	145862	156708	99.792	247	8	98.034	14	201.357	3	89.667
41	a0002G02	24,3,35,49,53,73,83	155281	82654	61	3	74	5162	51658	149506	96.281	149506	154976	99.804	139	13	98.369	49	3.837	51	45.961
42	a0002G05	24,27,4,52,60,77,90	150372	82412	43	5	95	9258	29490	128262	85.296	128262	147450	98.057	953	18	97.191	51	71.627	12	47.583
43	a0002G13	18,2,27,42,63,77,84	152287	82750	43	2	95	74547	74547	143169	94.013	143169	149094	97.903	303	8	99.436	100	6.22	23	10.304
44	a0002H01	26,36,4,47,59,72,86	151384	82940	61	5	74	149	30106	146762	96.947	146762	150533	99.438	97	22	98.617	18	42.278	30	44.433
45	a0002H12	20,3,36,51,65,78,90	140008	82262	61	3	74	11050	44431	119522	85.368	119522	133295	95.205	648	11	98.479	44	23.545	22	49.727
46	a0002H16	20,32,42,6,63,69,86	157007	82888	61	3	74	3203	52285	153503	97.768	153503	156856	99.904	319	6	99.621	9	59.556	1	59
47	a0002I03	18,2,31,41,61,78,79	150938	83240	49	2	89	74979	74979	146598	97.125	146598	149958	99.351	112	4	99.858	9	13.444	2	47
48	a0002K20	12,14,27,51,60,67,85	153250	82914	55	4	82	5446	38264	141984	92.649	141984	153056	99.873	107	9	99.272	11	43.909	14	45.214
49	a0002M14	1,19,29,44,64,76,80	148856	82716	55	1	82	148858	148858	148858	100.001	148858	148858	100.001	10	1	99.988	5	3.6	0	0
50	a0002M17	13,23,37,42,64,77,81	140344	82364	61	1	74	139505	139505	139505	99.402	139505	139505	99.402	20	2	95.956	12	473	0	0
51	a0002N07	11,17,37,45,54,77,88	42243	82094	79	1	53	63067	63067	63067	149.296	63067	63067	149.296	298	5	46.597	5	203.8	1	21540
52	a0002O23	1,16,37,51,58,71,90	153075	83264	31	8	98	1058	18612	91068	59.492	91068	148898	97.271	532	18	92.952	116	88.379	58	9.259
53	a0003A07	1,25,39,43,63,73,86	184340	83274	25	9	99	3293	18022	115580	62.699	115580	162199	87.989	748	22	96.394	134	44.791	24	26.917
54	a0003A08	16,3,30,45,61,78,83	163017	82982	55	2	82	81091	81091	162021	99.389	162021	162183	99.488	464	9	97.713	17	213.059	4	26.75
55	a0003A09	15,31,44,54,74,9,91	167162	82918	55	2	82	83718	83718	167313	100.09	167313	167437	100.165	509	8	99.636	8	35.5	4	81
56	a0003A23	16,34,48,58,7,77,79	152587	82034	43	4	95	26849	37758	97190	63.695	97190	151034	98.982	962	11	84.655	63	364	28	17.25
57	a0003B08	18,31,4,43,54,77,86	162921	82386	61	7	74	1326	23118	133806	82.129	133806	161828	99.329	574	19	95.169	13	432.231	118	19.076
58	a0003D18	1,23,39,49,53,77,82	134017	82746	61	3	75	485	44221	132058	98.538	132058	132664	98.99	195	7	97.207	17	213.118	1	120
59	a0003D19	19,33,49,54,7,74,83	178286	82596	55	3	82	1027	59322	176831	99.184	176831	177967	99.821	20	10	99.615	6	2.667	22	30.455
60	a0003E15	18,39,43,56,6,78,83	155501	82850	61	1	74	155517	155517	155517	100.01	155517	155517	100.01	75	3	99.971	3	7.667	1	22
61	a0003E22	23,38,4,49,56,72,84	181097	82976	61	2	75	90503	90503	147764	81.594	147764	181007	99.95	353	4	99.489	13	71.154	0	0
62	a0003F19	11,21,31,41,64,74,84	158307	83442	61	2	75	79122	79122	158097	99.867	158097	158244	99.96	107	6	98.478	10	226.7	5	28.4
63	a0003G14	17,37,42,58,72,8,84	150164	82876	49	2	89	75154	75154	150190	100.017	150190	150309	100.097	584	9	98.709	28	36.964	42	21.5
64	a0003G23	17,34,46,53,68,8,91	135918	81952	55	2	82	68042	68042	135947	100.021	135947	136085	100.123	82	6	99.545	15	4.867	13	41.923
65	a0003H05	24,32,43,57,6,74,81	162455	82526	61	3	74	11608	54081	143688	88.448	143688	162244	99.87	148	7	99.312	70	2.957	37	24.622
66	a0003H10	2,20,39,46,54,76,86	144922	82856	43	9	95	244	15649	122114	84.262	122114	140844	97.186	458	24	94.326	71	101	38	27.684
67	a0003H14	15,3,32,41,55,74,85	144774	82418	55	3	83	306	44448	132889	91.791	132889	133344	92.105	368	12	98.669	35	48.114	8	30.375
68	a0003H18	20,35,52,58,66,7,89	165830	82444	61	4	74	883	41546	164256	99.051	164256	166186	100.215	415	7	99.247	43	17.953	26	18.346
69	a0003I19	1,14,34,48,56,71,80	116389	83318	55	2	82	57356	57356	114464	98.346	114464	114713	98.56	778	9	94.725	53	109.792	15	21.333
70	a0003I23	17,27,3,46,61,72,79	143312	82624	49	8	89	208	17188	133427	93.102	133427	137510	95.951	110	14	88.074	35	475.143	4	115.25
71	a0003K15	11,26,27,40,65,76,86	166150	82950	31	8	97	579	19228	95105	57.24	95105	153829	92.584	1163	27	84.877	166	148.795	19	22.474
72	a0003L04	13,20,31,46,65,75,89	171397	82834	49	3	89	105	56869	170397	99.417	170397	170607	99.539	135	9	99.744	12	9.083	23	14.304
73	a0003L06	18,38,41,53,7,74,91	142557	82670	55	4	82	492	35253	139919	98.15	139919	141014	98.918	168	11	99.031	74	2.541	19	62.789
74	a0003L14	18,39,4,41,63,66,89	147109	82350	55	2	83	73600	73600	147069	99.973	147069	147200	100.062	10	2	99.876	7	7.429	1	130
75	a0003L20	17,29,4,40,63,72,80	120643	83180	61	1	74	120638	120638	120638	99.996	120638	120638	99.996	0	2	99.799	2	3	9	26.222
76	a0003P01	18,32,51,62,78,86,9	177226	82838	61	1	75	177253	177253	177253	100.015	177253	177253	100.015	79	4	99.713	9	6	16	28.375
77	a0003P21	25,27,4,49,65,75,79	152603	82574	61	3	74	68957	49513	79418	52.042	79418	148540	97.338	40	11	96.513	102	36.294	20	81
78	a0004A05	18,35,46,64,76,8,82	163886	82608	61	5	74	7570	31889	112218	68.473	112218	159447	97.291	635	15	93.876	43	177.93	123	19.398
79	a0004B07	1,19,39,48,59,72,87	157760	82800	43	11	95	525	14302	116608	73.915	116608	157332	99.729	615	31	94.573	164	28.604	86	45.012
80	a0004C18	10,18,37,41,56,69,80	175878	82718	61	1	74	175816	175816	175816	99.965	175816	175816	99.965	157	4	99.624	9	15.889	21	24.667
81	a0004D01	12,17,38,49,63,67,87	175691	82682	55	21	82	490	7713	44284	25.206	62237	161989	92.201	2910	61	89.451	204	78.392	92	27.63
82	a0004E14	1,19,36,52,54,68,81	162335	82400	61	15	74	1422	9098	31257	19.255	62966	136472	84.068	791	31	87.664	128	143.797	74	21.892
83	a0004F10	10,15,29,52,58,73,84	153046	82476	61	3	75	14774	50671	128315	83.841	128315	152015	99.326	487	13	97.893	74	30.986	29	32.138
84	a0004F16	25,39,51,61,69,88,9	149666	83136	49	3	89	27026	49814	122305	81.719	122305	149444	99.852	387	10	99.019	87	13.172	7	46
85	a0004F22	10,23,30,44,65,67,89	154832	82574	49	3	89	131	51698	154863	100.02	154863	155095	100.17	307	7	99.744	27	6.259	4	57
86	a0004F23	16,28,42,58,6,76,83	183398	83428	61	4	75	23536	45838	136062	74.189	136062	183355	99.977	445	16	98.143	65	29.538	82	18.122
87	a0004H09	21,35,50,53,70,8,88	157786	83234	61	11	74	977	13453	114843	72.784	114843	147993	93.793	1684	33	89.364	98	157.98	20	65
88	a0004H17	11,17,35,52,55,70,84	156436	83038	37	5	99	1543	30287	99450	63.572	99450	151438	96.805	303	19	98.683	104	11.817	56	14.857
89	a0004I02	12,20,31,45,62,69,79	153482	82628	55	2	82	76746	76746	153307	99.886	153307	153493	100.007	10	7	99.441	3	5.667	60	14.017
90	a0004J04	21,27,40,60,74,82,9	192436	83428	55	1	82	192159	192159	192159	99.856	192159	192159	99.856	101	4	99.534	15	43.2	1	248
91	a0004J05	16,32,43,62,76,8,85	154639	83162	55	1	82	154503	154503	154503	99.912	154503	154503	99.912	20	2	99.893	11	15	0	0
92	a0004J11	22,39,46,56,69,8,85	138765	82768	55	6	82	5491	21834	65929	47.511	65929	131009	94.411	434	10	93.433	36	234.306	14	48.429
93	a0004J20	11,20,36,46,63,74,79	139113	82824	55	2	82	68889	68889	132894	95.53	132894	137778	99.04	771	11	98.16	27	78.111	11	41
94	a0004K07	22,34,45,55,77,85,9	172771	82448	55	7	82	10555	22764	87069	50.396	87069	159354	92.234	671	21	96.745	47	97.872	32	31.969
95	a0004K08	13,24,39,45,55,69,87	142444	82768	61	1	75	142347	142347	142347	99.932	142347	142347	99.932	10	3	99.918	4	20.5	1	35
96	a0004L12	17,39,4,44,58,68,87	143114	82916	49	8	89	2703	17103	118117	82.534	118117	136824	95.605	140	15	87.859	65	260.538	10	44
97	a0004L24	14,38,40,59,69,7,83	175117	83576	61	2	75	87391	87391	174644	99.73	174644	174782	99.809	186	7	99.476	25	24.24	10	31.1
98	a0004N06	18,28,48,5,65,66,90	168617	82202	61	8	75	3642	20724	64235	38.095	82206	165799	98.329	576	21	90.487	67	222.851	47	23.617
99	a0004N07	10,22,31,50,53,66,89	154516	82622	37	3	99	10989	50902	137178	88.779	137178	152706	98.829	250	7	98.465	31	72.774	5	23.2
100	a0004N11	25,31,49,5,53,69,84	150338	82930	61	1	74	150261	150261	150261	99.949	150261	150261	99.949	0	2	99.732	47	1.447	1	335
101	a0004N12	1,25,34,41,59,75,89	158173	82660	61	1	75	158125	158125	158125	99.97	158125	158125	99.97	88	3	99.781	46	2.13	1	248
102	a0004N23	23,27,3,41,65,73,91	159046	82706	43	3	95	27409	52635	130315	81.935	130315	157907	99.284	122	12	99.206	39	11.154	33	25.091
103	a0004P05	22,29,4,51,62,75,90	161352	83592	61	4	74	1610	40123	157152	97.397	157152	160494	99.468	208	10	99.237	25	29.92	45	10.733
104	a0004P10	13,19,27,50,62,76,79	140308	83110	55	5	82	5706	27218	105313	75.058	105313	136092	96.995	173	11	95.441	21	277.238	7	82
105	a0004P19	1,25,27,46,56,70,88	166699	82282	61	7	74	474	23671	112704	67.609	112704	165702	99.402	954	26	93.9	71	119.014	45	38.2
106	a0005B06	18,2,33,47,60,72,83	184331	83654	61	1	74	184303	184303	184303	99.985	184303	184303	99.985	84	5	99.922	8	7.875	4	20
107	a0005B10	14,39,45,58,78,79,9	138503	82682	55	1	82	138457	138457	138457	99.967	138457	138457	99.967	150	4	99.873	7	17.571	1	53
108	a0005B14	13,26,38,49,59,68,89	175941	83050	37	33	97	172	4933	51934	29.518	57588	162794	92.528	552	91	91.68	362	27.249	141	33.858
109	a0005B20	1,14,33,45,63,74,91	157877	82598	43	10	95	486	15175	114357	72.434	114357	151757	96.124	435	23	89.97	128	115.031	20	55.55
110	a0005C12	22,35,45,6,65,69,83	190734	83024	37	4	99	154	47398	189155	99.172	189155	189593	99.402	724	13	95.682	63	126.921	18	13.278
111	a0005D04	10,16,38,50,65,70,91	180499	82636	31	4	99	597	44859	178139	98.693	178139	179438	99.412	505	9	92.183	45	310.467	6	23.167
112	a0005D06	16,2,29,41,65,75,84	152395	83284	55	3	82	125	50839	152275	99.921	152275	152519	100.081	40	7	99.726	9	11.667	2	156.5
113	a0005D13	1,18,35,52,56,73,90	135483	83036	61	7	75	489	19327	121837	89.928	121837	135294	99.86	441	21	96.532	84	29.226	61	36.77
114	a0005D14	19,39,4,51,55,77,91	154175	82456	61	8	75	837	18884	112097	72.708	112097	151073	97.988	590	29	96.129	36	58.278	147	26.327
115	a0005F08	16,35,40,57,73,88,9	142789	82996	61	1	74	142837	142837	142837	100.034	142837	142837	100.034	238	4	99.645	12	2.417	11	43.455
116	a0005F14	26,3,33,50,64,75,83	167659	82870	61	7	75	193	22212	154312	92.039	154312	155488	92.741	275	15	85.506	48	488.896	23	36.261
117	a0005F15	13,18,33,45,54,73,89	160163	82892	61	1	74	160251	160251	160251	100.055	160251	160251	100.055	181	7	99.692	9	9.222	12	34.167
118	a0005G22	25,28,4,52,58,72,81	157530	82694	61	1	75	154424	154424	154424	98.028	154424	154424	98.028	85	5	99.873	19	5.316	2	49.5
119	a0005H04	2,21,32,48,56,69,87	156538	83184	55	5	82	309	30863	84093	53.721	84093	154319	98.582	513	20	98.031	79	20.114	60	24.9
120	a0005H08	22,31,46,54,6,68,88	137827	82456	61	1	74	137663	137663	137663	99.881	137663	137663	99.881	10	2	99.872	4	44.25	0	0
121	a0005H09	1,19,28,41,58,66,91	183840	83260	61	1	74	183805	183805	183805	99.981	183805	183805	99.981	319	7	99.739	6	70.167	1	59
122	a0005H12	26,37,5,51,55,75,85	150780	83314	43	5	95	112	29316	140553	93.217	140553	146580	97.214	363	13	94.619	340	20.906	38	26.474
123	a0005H24	18,35,44,58,6,77,88	160350	83158	49	6	89	5018	26485	115280	71.893	115280	158914	99.104	100	14	98.905	27	49.889	10	40.9
124	a0005J11	18,29,41,54,68,8,83	181246	83356	49	5	89	7836	35429	151778	83.741	151778	177149	97.74	249	17	99.266	36	6.833	33	32.879
125	a0005L01	18,3,35,41,62,72,84	160025	83600	37	6	99	3615	26524	139719	87.311	139719	159146	99.451	276	13	94.063	43	193.628	21	55.905
126	a0005L07	1,19,31,50,63,70,84	163606	83168	55	4	82	6377	40639	149696	91.498	149696	162559	99.36	308	17	96.639	38	133.605	20	21.05
127	a0005L14	26,29,44,58,71,83,9	139953	82112	49	16	89	418	8337	117736	84.125	117736	133407	95.323	901	29	80.02	78	331.705	144	14.507
128	a0005M15	22,28,49,5,59,71,85	155694	83768	49	6	89	1529	25538	108999	70.008	108999	153231	98.418	163	18	97.835	30	61.3	67	22.866
129	a0005M16	10,23,27,48,60,76,83	154241	82824	43	7	95	4613	21175	104926	68.027	104926	148230	96.103	180	13	95.141	83	85.217	17	24.824
130	a0005N04	23,35,43,60,7,73,82	183265	82646	43	3	95	25201	60843	157208	85.782	157208	182529	99.598	847	15	97.726	76	47.421	23	24.522
131	a0005N07	26,37,52,58,6,68,82	155840	82590	37	7	97	166	21667	139380	89.438	139380	151671	97.325	277	17	94.409	39	202.744	72	11.194
132	a0005N17	17,38,4,41,65,71,85	156934	83018	55	2	82	78255	78255	156383	99.649	156383	156510	99.73	30	9	99.586	16	3.188	20	29.95
133	a0005O11	16,32,40,5,53,71,81	146255	82926	49	3	89	10516	47344	127224	86.988	127224	142033	97.113	40	9	98.019	17	154.235	7	39.286
134	a0005O15	11,25,27,43,60,78,84	162408	82724	61	2	75	80975	80975	161742	99.59	161742	161950	99.718	108	7	99.447	17	37.412	6	43.667
135	a0005O18	12,26,32,43,59,67,80	153701	82688	43	4	95	11140	37566	127880	83.2	127880	150267	97.766	176	14	99.327	55	4.291	15	53.267
136	a0005P10	11,26,31,52,63,77,81	163766	82782	55	4	82	203	40807	162679	99.336	162679	163230	99.673	172	7	98.967	43	27	19	27.947
137	a0005P12	10,14,28,52,60,78,80	193424	82958	49	3	89	162	64561	193412	99.994	193412	193684	100.134	249	9	99.645	16	17.125	8	51.5
138	a0006A05	14,29,52,57,7,70,91	146785	83112	61	7	75	738	20738	141713	96.545	141713	145169	98.899	702	15	87.347	43	416.884	22	29.409
139	a0006A15	12,16,35,43,53,78,79	142385	83308	49	11	89	1587	12873	103018	72.352	103018	141609	99.455	292	23	95.79	31	110.097	170	15.182
140	a0006A22	18,30,4,40,61,67,84	190692	82454	61	3	74	8474	61872	173895	91.192	173895	185617	97.339	245	12	99.384	86	2.035	19	52.579
141	a0006B13	11,20,38,52,62,68,83	144690	83314	55	10	82	868	14362	86724	59.938	86724	143623	99.263	383	24	96.786	114	7.158	95	40.368
142	a0006D01	13,18,28,43,63,75,79	133631	81602	61	3	74	24941	44486	108357	81.087	108357	133460	99.872	343	12	94.046	10	731.1	10	64.5
143	a0006D11	26,35,45,5,56,68,81	176638	82186	55	2	82	88008	88008	175634	99.432	175634	176016	99.648	40	7	98.938	31	9.226	154	10.325
144	a0006E05	12,19,37,40,54,66,89	151126	82812	61	2	74	75411	75411	150597	99.65	150597	150822	99.799	40	4	99.669	13	27.923	3	45.667
145	a0006E07	20,38,46,5,57,71,88	145191	83162	61	1	74	144963	144963	144963	99.843	144963	144963	99.843	10	2	99.832	7	34.857	0	0
146	a0006F11	10,22,37,42,63,74,88	166236	83044	61	4	74	2705	41543	160641	96.634	160641	166173	99.962	211	10	99.401	50	8.74	11	50.818
147	a0006G04	18,37,52,63,70,8,86	156937	83278	55	2	82	78475	78475	156817	99.924	156817	156950	100.008	49	4	99.806	4	43	1	132
148	a0006G16	2,24,36,51,56,77,88	172915	83728	61	1	75	173120	173120	173120	100.119	173120	173120	100.119	210	4	99.84	15	15.867	4	9.75
149	a0006G21	24,28,43,5,56,67,89	133701	83302	49	2	89	66783	66783	133462	99.821	133462	133566	99.899	60	5	98.797	16	94.062	1	103
150	a0006I23	13,19,35,48,58,78,82	160978	83110	61	1	75	161024	161024	161024	100.029	161024	161024	100.029	229	3	98.956	13	129.308	0	0
151	a0006J08	22,35,4,43,59,70,89	167729	82886	61	2	75	83623	83623	159287	94.967	159287	167246	99.712	10	6	99.382	11	3.182	58	17.276
152	a0006K03	18,2,35,40,59,66,87	180381	83036	43	2	95	86509	86509	166936	92.546	166936	173018	95.918	180	9	99.283	45	22.733	33	8.182
153	a0006N03	18,30,45,63,71,82,9	180467	83128	55	3	82	14574	59648	164262	91.021	164262	178946	99.157	527	13	98.54	21	104.571	6	73
154	a0006N17	14,34,4,51,65,76,84	177031	82300	55	4	82	130	44001	175627	99.207	175627	176006	99.421	273	12	97.628	58	63.103	6	89.833
155	a0006N19	10,24,34,40,55,66,86	146214	82658	61	17	74	304	5652	56135	38.392	56135	96096	65.723	1086	68	70.328	222	178.32	105	36.171
156	a0006N24	15,2,39,48,55,73,89	164615	82576	61	14	74	276	11496	117547	71.407	117547	160950	97.774	675	38	91.8	152	66.197	80	42.95
157	a0006O21	13,20,39,44,61,77,79	174461	82900	49	4	89	6822	42459	156049	89.446	156049	169836	97.349	10	10	99.044	30	32.967	18	37.667
158	a0006P17	21,3,32,49,59,75,84	139985	82844	61	2	74	69867	69867	139405	99.586	139405	139735	99.821	20	3	99.211	28	32.179	5	40.6
159	a0006P19	13,18,34,48,60,70,91	164950	83452	49	1	89	164954	164954	164954	100.002	164954	164954	100.002	40	1	99.965	8	7.25	0	0
160	a0007A06	19,28,45,5,57,77,79	148030	82138	55	15	82	1166	9408	118165	79.825	118165	141121	95.333	1177	61	93.892	176	26.199	127	34.882
161	a0007A11	2,26,32,46,55,72,84	141160	82734	61	2	75	70567	70567	140995	99.883	140995	141134	99.982	20	9	99.527	4	26.75	10	56.1
162	a0007C14	13,21,36,45,61,71,88	135065	82626	37	2	98	66648	66648	133178	98.603	133178	133296	98.69	243	10	94.406	48	155.083	6	18.667
163	a0007D01	24,28,46,65,72,8,80	157557	82736	55	16	82	1500	9323	94930	60.251	94930	149174	94.679	1190	33	79.351	109	287.486	59	20.305
164	a0007D06	18,34,44,61,72,9,90	167397	83244	43	1	95	167381	167381	167381	99.99	167381	167381	99.99	325	5	99.844	11	23.727	0	0
165	a0007D15	21,34,44,5,64,68,82	164286	82280	55	1	82	164247	164247	164247	99.976	164247	164247	99.976	240	6	99.7	18	10.389	9	34
166	a0007E10	13,15,35,47,64,73,87	154125	82904	61	4	74	10660	38227	129247	83.859	129247	152910	99.212	255	9	98.976	58	4.776	22	59.136
167	a0007F17	15,38,50,64,67,7,85	164478	82274	49	9	89	529	18121	88927	54.066	88927	163095	99.159	288	24	97.047	102	27.098	57	36.719
168	a0007G11	15,27,44,53,67,8,86	176641	82612	37	2	98	87726	87726	175318	99.251	175318	175453	99.327	397	11	99.337	40	26.025	5	26.2
169	a0007H11	21,28,43,53,71,84,9	155827	82910	61	2	74	77663	77663	147707	94.789	147707	155326	99.678	543	11	94.208	44	200.114	2	110.5
170	a0007J02	14,3,36,43,61,77,91	150245	83188	61	1	74	150197	150197	150197	99.968	150197	150197	99.968	30	4	99.846	4	7	3	67.667
171	a0007J06	10,17,37,44,64,71,91	148936	83068	55	6	82	1584	24696	134111	90.046	134111	148181	99.493	296	10	98.784	28	50.75	8	48.75
172	a0007K09	20,39,4,48,60,75,80	143381	82812	37	3	99	5693	47533	136788	95.402	136788	142599	99.455	459	13	98.235	60	38.733	14	14.714
173	a0007K17	13,18,39,50,64,68,88	149657	83526	55	2	83	74698	74698	144885	96.811	144885	149396	99.826	176	7	99.661	8	24	7	45
174	a0007L18	2,23,30,49,54,71,87	183314	83134	43	6	95	2380	30209	165781	90.436	165781	181259	98.879	60	13	98.298	52	43.538	10	85.6
175	a0007P08	23,28,48,57,68,7,81	141817	82842	55	2	82	70472	70472	140835	99.308	140835	140944	99.384	30	5	99.15	45	24.267	3	38
176	a0007P23	11,14,28,40,63,71,90	166693	82710	55	1	82	166647	166647	166647	99.972	166647	166647	99.972	481	6	99.435	29	29.966	1	72
177	a0008A04	21,39,4,45,65,73,82	165353	82774	31	4	99	5977	40722	150814	91.207	150814	162889	98.51	219	15	99.106	61	8	78	12.692
178	a0008B20	26,30,4,42,62,77,87	173658	83256	43	8	95	2511	21515	122065	70.29	122065	172126	99.118	357	17	94.143	144	65.597	27	26.889
179	a0008C07	11,14,32,52,61,72,85	146014	82842	43	5	95	5260	28997	125251	85.78	125251	144988	99.297	110	13	98.662	68	19.029	4	165
180	a0008C11	2,26,35,42,60,76,90	157205	83342	55	1	82	157203	157203	157203	99.999	157203	157203	99.999	20	2	99.908	5	6.2	2	56.5
181	a0008D01	17,28,42,59,66,89,9	149744	82686	61	7	74	469	21289	101935	68.073	101935	149024	99.519	219	54	97.782	12	7	23	140.739
182	a0008D10	25,32,42,55,71,8,90	170004	83022	43	6	95	636	27914	155206	91.295	155206	167484	98.518	294	16	97.954	49	59.449	17	33.294
183	a0008D12	25,39,49,55,7,70,81	167432	82332	49	2	89	83725	83725	167349	99.95	167349	167450	100.011	20	4	99.881	31	2.935	3	36
184	a0008E08	12,24,27,47,58,73,79	145125	83302	55	2	82	70462	70462	119517	82.355	119517	140925	97.106	406	10	96.157	38	136.711	11	34.727
185	a0008E15	11,18,28,41,57,76,85	140580	82972	55	6	82	2843	21834	117457	83.552	117457	131004	93.188	275	14	87.353	30	455.6	262	15.691
186	a0008F02	2,23,34,48,65,72,82	177115	83030	49	11	89	986	15516	127882	72.203	127882	170678	96.366	591	25	90.746	160	96.856	55	16.255
187	a0008F10	12,22,27,40,61,77,88	145374	82582	55	1	82	145366	145366	145366	99.994	145366	145366	99.994	40	1	99.959	7	8.571	0	0
188	a0008G22	11,26,30,49,57,67,79	195162	82526	43	3	95	19899	64376	171605	87.93	171605	193130	98.959	334	10	97.213	43	121.581	3	70.667
189	a0008H20	13,17,38,50,53,73,84	187891	82914	61	1	75	188013	188013	188013	100.065	188013	188013	100.065	266	5	97.462	8	590	3	16.333
190	a0008I04	16,39,52,55,74,83,9	182099	83644	49	3	89	172	60742	181941	99.913	181941	182228	100.071	690	12	99.417	36	21.306	3	98
191	a0008J04	19,38,49,5,65,73,86	145570	82678	61	4	75	204	35905	143034	98.258	143034	143623	98.662	50	10	99.126	31	25.452	9	53.667
192	a0008K21	15,27,3,52,64,76,88	184036	83000	49	3	89	145	61094	182992	99.433	182992	183282	99.59	297	9	99.21	21	55.762	8	35.25
193	a0008L10	25,29,43,5,54,75,80	168503	82522	37	45	98	184	3350	81426	48.323	81426	150772	89.477	2847	101	77.962	293	113.058	105	38.181
194	a0008M11	25,28,44,60,76,79,9	135347	82912	49	9	89	512	14816	86278	63.746	86278	133351	98.525	213	20	98.462	55	17.636	37	30.054
195	a0008N11	17,35,49,59,78,8,80	145372	82830	61	2	75	72131	72131	140915	96.934	140915	144262	99.236	222	5	99.66	11	33.818	2	61
196	a0008O15	25,28,43,57,70,8,82	177800	82788	43	16	94	2731	10617	120787	67.934	120787	169875	95.543	395	34	95.683	78	77.91	81	19.728
197	a0008P05	26,36,52,61,76,84,9	111706	82026	55	3	82	3039	37258	108602	97.221	108602	111775	100.062	821	17	98.892	23	23.348	18	38.944
198	a0009B14	17,32,4,49,55,76,86	164083	82642	61	4	74	19155	39842	117533	71.63	117533	159368	97.126	251	13	97.467	94	29.032	54	26.444
199	a0009B24	15,27,43,63,7,74,89	175711	82772	55	3	82	4276	58199	170195	96.861	170195	174598	99.367	103	11	98.786	14	85.143	40	23.55
200	a0009C08	10,14,29,42,53,75,82	136864	83440	61	5	74	3965	24964	107686	78.681	107686	124820	91.2	168	16	96.14	56	69.946	32	42.688
201	a0009C22	17,3,35,44,57,74,82	140238	82330	49	1	89	140228	140228	140228	99.993	140228	140228	99.993	0	1	99.992	2	5.5	0	0
202	a0009D03	24,36,43,58,68,7,86	138236	82220	55	4	82	25223	33945	85224	61.651	85224	135780	98.223	531	10	93.704	17	459.118	53	16.962
203	a0009D05	13,15,27,49,55,71,84	166741	82966	61	2	74	83409	83409	161981	97.145	161981	166819	100.047	193	6	99.782	17	6.294	5	51.2
204	a0009D10	14,2,31,40,54,73,84	136126	82512	55	22	82	327	5061	75698	55.609	75698	111359	81.806	839	73	81.014	200	109.1	120	33.542
205	a0009D16	14,31,45,56,7,77,82	152456	83536	61	5	75	1103	29240	135429	88.832	135429	146202	95.898	621	16	90.284	179	69.296	29	83.034
206	a0009E03	2,24,27,50,54,78,83	163758	82202	37	3	98	115	54539	163394	99.778	163394	163619	99.915	591	10	99.355	35	23.943	4	54.75
207	a0009E21	21,3,39,44,62,67,85	153217	83026	55	1	82	153137	153137	153137	99.948	153137	153137	99.948	173	8	99.078	8	4.25	40	34.45
208	a0009F16	20,36,41,6,61,70,81	191893	82744	61	2	74	95834	95834	187158	97.532	187158	191669	99.883	205	8	99.803	10	20.9	4	42.25
209	a0009G17	17,35,4,45,60,67,79	177437	82876	61	3	74	21309	59172	155979	87.907	155979	177516	100.045	535	13	99.361	16	18	33	25.636
210	a0009I02	14,31,46,59,70,79,8	160363	82404	55	2	82	80218	80218	160319	99.973	160319	160436	100.046	275	5	99.269	11	85.818	5	45.8
211	a0009J03	18,2,34,50,53,69,85	162927	82942	55	2	82	81069	81069	161833	99.329	161833	162138	99.516	229	10	97.739	191	8.063	45	47.644
212	a0009J04	10,17,27,40,56,75,84	153033	82450	61	3	74	705	50471	150548	98.376	150548	151415	98.943	208	8	97.119	12	349.333	5	43.4
213	a0009J11	19,35,44,59,67,81,9	156867	82468	61	2	74	78582	78582	157010	100.091	157010	157165	100.19	466	11	99.283	8	16.125	31	32.097
214	a0009J18	17,38,45,64,69,8,86	152470	83086	61	1	75	152466	152466	152466	99.997	152466	152466	99.997	0	1	99.997	1	5	0	0
215	a0009J19	15,34,51,53,66,7,90	156995	82638	61	3	74	13135	52182	139512	88.864	139512	156547	99.715	315	8	99.441	34	19.529	4	53.5
216	a0009K02	15,31,43,64,68,8,81	165161	83282	49	2	89	81159	81159	156273	94.619	156273	162318	98.279	131	4	99.891	14	6.143	2	47
217	a0009K05	20,33,46,59,7,72,85	159495	82382	49	4	89	30177	39436	97172	60.925	97172	157747	98.904	339	11	94.779	41	195.585	4	77.25
218	a0009K14	15,3,38,46,65,69,84	172742	82368	49	10	89	432	16399	143273	82.94	143273	163997	94.938	324	19	92.092	74	160.905	107	16.383
219	a0009L08	2,24,31,49,65,66,91	134657	82776	31	2	99	65932	65932	131586	97.719	131586	131864	97.926	454	8	99.429	35	17.714	15	9.933
220	a0009L10	17,32,52,64,68,7,90	152941	82358	61	1	75	148309	148309	148309	96.971	148309	148309	96.971	75	7	99.452	16	38.625	6	36.667
221	a0009L21	23,28,46,5,64,69,87	147165	82222	61	2	74	73154	73154	88238	59.959	88238	146309	99.418	10	4	99.282	13	67.692	3	58.667
222	a0009L24	11,15,37,51,57,68,84	144495	82184	37	1	99	144059	144059	144059	99.698	144059	144059	99.698	171	4	99.872	17	8.824	1	35
223	a0009M23	2,26,37,48,59,70,81	166439	83104	61	2	74	83420	83420	166528	100.053	166528	166841	100.242	361	11	98.839	146	1.774	13	128.692
224	a0009N14	10,22,33,43,65,73,80	153776	82842	61	4	75	5652	37993	140478	91.352	140478	151975	98.829	227	14	96.942	37	96.676	25	45.04
225	a0009N22	20,33,4,43,63,67,81	155713	82456	61	3	75	8570	51021	144343	92.698	144343	153065	98.299	290	13	95.932	67	67.239	151	12.119
226	a0009O06	26,36,50,55,7,77,90	183794	83260	61	2	74	91507	91507	172182	93.682	172182	183015	99.576	141	7	99.746	16	9.938	5	61.6
227	a0009O10	13,16,33,51,57,77,85	150447	83428	61	6	75	365	24746	146949	97.675	146949	148481	98.693	248	11	93.913	17	506.941	15	36
228	a0009P07	15,28,45,53,6,78,81	160000	82718	31	8	99	1748	19545	120493	75.308	120493	156364	97.728	225	28	98.329	46	46.674	14	37.643
229	a0009P12	21,34,4,43,61,75,85	179624	83458	43	2	95	87779	87779	172721	96.157	172721	175558	97.736	271	5	99.244	15	85.133	3	27
230	a0009P17	12,26,27,41,55,69,83	183093	82950	61	2	74	91230	91230	171598	93.722	171598	182460	99.654	427	10	99.826	15	9.933	8	21.125
231	a0010A07	19,33,48,6,64,68,86	148575	83202	61	4	74	13601	36754	118327	79.641	118327	147019	98.953	805	22	97.154	81	24.099	67	33.97
232	a0010B21	19,30,41,65,76,8,87	155599	82894	49	15	89	255	10103	88448	56.844	88448	151555	97.401	1041	41	95.069	63	80.206	141	18.582
233	a0010B23	23,31,4,41,53,67,83	150784	83300	49	2	89	74957	74957	141798	94.04	141798	149915	99.424	113	4	99.859	26	4.577	2	47
234	a0010C24	13,16,29,52,59,76,90	158294	82432	61	7	75	1333	22361	122305	77.264	122305	156530	98.886	981	27	91.859	49	174.878	243	17.77
235	a0010D24	13,17,35,41,61,69,91	157189	82888	61	1	74	156965	156965	156965	99.857	156965	156965	99.857	10	2	99.85	3	78.667	0	0
236	a0010E05	23,33,50,61,66,7,91	154151	82394	61	5	75	218	30579	151753	98.444	151753	152895	99.185	299	14	91.187	52	248.904	18	35.722
237	a0010E10	15,33,50,53,68,82,9	145480	82658	55	2	82	72217	72217	128694	88.462	128694	144435	99.282	60	10	99.576	25	9.12	12	32.417
238	a0010F09	21,36,41,62,73,87,9	149296	82998	61	1	74	149298	149298	149298	100.001	149298	149298	100.001	10	1	99.988	3	6	0	0
239	a0010H09	2,20,36,50,62,72,80	138225	82906	55	7	82	1569	18983	100337	72.59	100337	132884	96.136	1000	16	85.063	42	481.452	4	106.5
240	a0010H20	26,28,3,48,60,77,86	183703	82266	61	21	74	1023	8661	122427	66.644	122427	181886	99.011	2119	51	91.096	226	49.394	154	33.721
241	a0010I03	15,28,46,56,7,71,91	153910	82692	49	5	89	118	30255	150779	97.966	150779	151279	98.291	480	12	95.305	27	251	7	64.143
242	a0010J05	19,34,5,50,54,72,91	157860	83354	61	1	74	157170	157170	157170	99.563	157170	157170	99.563	186	7	99.539	11	47.455	6	34.333
243	a0010K06	10,14,27,49,54,68,91	163032	82360	43	3	95	108	54022	161854	99.277	161854	162066	99.407	182	10	98.824	24	63.167	15	26.733
244	a0010K23	22,38,43,63,72,8,83	178081	83156	43	17	95	222	9700	115939	65.105	115939	164911	92.604	888	33	83.043	57	504.07	132	11.106
245	a0010M06	25,30,50,59,70,83,9	145608	83230	55	1	82	145565	145565	145565	99.97	145565	145565	99.97	10	1	99.961	9	6.333	0	0
246	a0010N03	20,3,33,42,60,74,84	140973	82464	37	5	99	1191	27872	130010	92.223	130010	139362	98.857	120	14	98.067	100	22.75	23	19.565
247	a0010N05	11,20,30,41,53,66,80	168954	83372	31	4	98	898	41301	163272	96.637	163272	165205	97.781	100	10	93.415	31	358.742	1	4
248	a0010N17	11,19,38,42,57,70,81	152950	83670	61	3	74	7271	50964	145192	94.928	145192	152892	99.962	1485	19	94.689	29	255.862	15	46.867
249	a0010O17	26,27,49,53,7,78,85	170652	82372	61	3	74	10613	56869	154392	90.472	154392	170607	99.974	341	10	99.255	8	31.375	35	29.143
250	a0010P05	13,20,33,52,64,69,80	158694	83094	37	5	98	367	31714	153945	97.007	153945	158574	99.924	1032	15	96.421	62	87.871	4	57.75
251	a0011B01	17,28,5,51,60,68,88	149133	83332	49	3	89	3006	49680	145915	97.842	145915	149040	99.938	453	12	98.67	151	1.669	42	41.238
252	a0011B06	10,24,39,42,59,77,83	156763	82878	49	7	89	6558	22142	77499	49.437	77499	154998	98.874	1227	29	97.017	84	24.155	105	25.219
253	a0011B08	16,31,40,56,66,8,83	177882	83218	61	2	75	88633	88633	172630	97.047	172630	177267	99.654	136	7	99.271	39	25.308	12	25.75
254	a0011B11	1,24,28,52,57,69,88	147154	83412	61	2	75	73569	73569	138131	93.868	138131	147139	99.99	183	9	98.884	4	8.5	71	22.648
255	a0011C08	12,18,27,52,54,72,80	155243	84198	55	5	82	10524	29416	106945	68.889	106945	147083	94.744	342	11	93.339	32	317.219	3	63.333
256	a0011C12	20,28,3,40,56,76,87	165990	82688	61	7	74	2299	23568	135823	81.826	135823	164981	99.392	622	14	91.848	228	47.39	27	100.963
257	a0011E03	20,31,41,63,71,8,91	139849	82968	61	3	74	6602	46367	132377	94.657	132377	139101	99.465	30	20	99.045	23	1.522	22	59.091
258	a0011E14	10,20,28,47,64,66,79	167821	82762	61	7	74	178	14208	94665	56.408	94665	99459	59.265	264	25	74.536	107	392.645	20	36.05
259	a0011E17	15,28,44,5,63,72,84	145470	82870	31	7	99	143	20821	142656	98.066	142656	145747	100.19	831	16	91.31	40	298.125	21	34.143
260	a0011E24	23,29,52,53,71,8,80	134012	83072	49	4	89	12609	33404	108295	80.81	108295	133619	99.707	326	11	98.13	70	31.686	14	20.571
261	a0011G01	26,31,49,54,72,8,90	189019	82854	61	1	74	186599	186599	186599	98.72	186599	186599	98.72	345	8	99.051	39	45.923	1	3
262	a0011G13	10,14,31,48,65,69,86	126035	82876	37	1	99	126035	126035	126035	100	126035	126035	100	0	3	99.745	1	1	13	24.692
263	a0011G15	11,20,31,44,59,76,82	151037	83238	49	6	89	7860	24666	117690	77.921	117690	147997	97.987	874	21	97.681	75	29.853	32	39.469
264	a0011G16	13,18,38,47,58,71,86	175325	83238	61	5	74	7553	34507	98775	56.338	98775	172536	98.409	818	14	91.517	21	665.81	53	16.792
265	a0011H17	21,30,48,62,72,8,91	178110	83042	61	1	75	178072	178072	178072	99.979	178072	178072	99.979	73	4	99.96	5	2.4	1	59
266	a0011I02	10,24,29,51,64,68,89	187739	82652	61	5	74	286	37510	186340	99.255	186340	187550	99.899	537	14	96.316	27	244.963	10	30.2
267	a0011I16	12,18,32,41,58,70,90	183165	82706	61	3	74	1736	59599	176829	96.541	176829	178798	97.616	1036	12	95.774	23	324.043	7	41
268	a0011J06	14,36,4,44,64,70,88	146867	82236	61	1	74	146962	146962	146962	100.065	146962	146962	100.065	86	3	99.946	8	4.625	2	21.5
269	a0011J08	1,18,32,43,64,69,84	157742	83104	37	4	99	1048	39219	154682	98.06	154682	156878	99.452	493	8	97.147	42	104.667	2	52.5
270	a0011L02	11,21,28,45,59,70,91	158743	82946	55	9	82	554	16385	93325	58.79	93325	147468	92.897	679	34	90.502	106	117.17	101	26.307
271	a0011L03	10,26,27,52,62,70,89	139441	82514	61	1	74	139474	139474	139474	100.024	139474	139474	100.024	261	4	99.834	6	38.667	0	0
272	a0011L16	14,33,4,48,59,66,82	161140	83050	61	1	75	161238	161238	161238	100.061	161238	161238	100.061	98	2	99.79	4	78	1	26
273	a0011N03	1,26,36,44,63,67,82	162587	82526	37	10	98	928	16188	144983	89.173	144983	161888	99.57	1168	22	90.454	202	74.47	10	47.8
274	a0011N12	11,22,35,50,54,73,81	158592	83230	43	4	95	2877	38922	149828	94.474	149828	155690	98.17	170	11	98.057	23	96	50	17.46
275	a0011O22	1,21,33,50,59,73,79	165376	83324	55	2	82	82786	82786	165447	100.043	165447	165573	100.119	344	7	99.711	16	13.375	5	52.8
276	a0011P18	17,30,46,65,7,74,86	166070	82818	61	3	74	7974	55345	157913	95.088	157913	166037	99.98	463	9	99.3	38	20.395	13	29.769
277	a0012A09	21,3,36,48,57,76,79	154531	83206	61	3	75	3822	51336	150040	97.094	150040	154010	99.663	84	6	99.017	9	85.222	49	15.347
278	a0012A14	26,27,3,45,54,67,84	144809	83150	61	1	75	144992	144992	144992	100.126	144992	144992	100.126	326	4	99.878	5	32.8	1	12
279	a0012C20	25,33,45,61,68,79,8	147939	82898	49	3	89	18882	48958	124539	84.183	124539	146876	99.281	66	8	99.19	26	26.5	10	51
280	a0012D04	10,18,39,47,55,76,84	161186	82310	43	15	95	2935	10276	89583	55.577	89583	154147	95.633	846	39	86.898	119	166.193	53	25.321
281	a0012E01	25,32,5,52,59,66,86	167960	81764	49	4	89	226	40454	161247	96.003	161247	161819	96.344	267	17	93.077	49	222.735	20	35.7
282	a0012E09	2,21,39,43,59,74,88	143489	82466	55	1	82	142729	142729	142729	99.47	142729	142729	99.47	50	3	99.187	30	33.433	1	163
283	a0012E23	19,32,44,5,55,78,87	149043	82224	55	3	82	7115	49423	140720	94.416	140720	148270	99.481	414	8	99.308	25	13.64	10	69.1
284	a0012F03	19,32,46,61,7,77,81	146407	82476	61	1	74	146447	146447	146447	100.027	146447	146447	100.027	51	7	99.305	6	6.167	30	32.7
285	a0012F10	11,16,30,40,59,74,85	171179	82654	49	3	89	148	56962	170635	99.682	170635	170886	99.829	283	12	99.312	29	32.138	8	30.625
286	a0012F18	20,3,30,46,55,70,91	157481	82588	55	1	82	157409	157409	157409	99.954	157409	157409	99.954	283	9	99.279	14	1.571	39	28.538
287	a0012G01	11,24,35,44,64,69,85	192852	82240	55	3	82	16030	63637	174726	90.601	174726	190912	98.994	30	14	99.014	13	20.308	90	18.189
288	a0012G07	25,36,4,50,54,74,84	165620	83494	55	14	82	2010	11429	106658	64.399	106658	160016	96.616	1024	37	83.922	117	205.274	166	15.729
289	a0012G17	20,34,51,58,68,81,9	132626	83190	61	4	75	337	32185	127912	96.446	127912	128740	97.07	355	14	97.752	57	34.333	11	93.091
290	a0012G20	21,33,45,57,69,81,9	153236	83566	37	3	99	2906	50616	147901	96.518	147901	151849	99.095	294	11	97.967	59	47.186	22	15.045
291	a0012H15	12,22,30,49,53,68,81	146080	83528	37	8	99	342	17920	139884	95.758	139884	143363	98.14	306	18	90.959	123	100.26	34	25.735
292	a0012I12	25,37,4,40,60,71,86	183552	82746	61	3	75	1045	61043	181876	99.087	181876	183130	99.77	50	11	99.185	42	11.357	18	56.611
293	a0012I14	10,26,39,49,56,73,87	158445	83226	61	1	74	158415	158415	158415	99.981	158415	158415	99.981	225	5	99.884	18	8.222	2	18
294	a0012I24	21,30,45,5,53,67,87	178250	82860	61	2	74	87316	87316	168334	94.437	168334	174633	97.971	411	10	99.694	16	29.312	3	25.333
295	a0012J06	13,25,33,50,63,72,90	124597	83294	55	2	82	62277	62277	124300	99.762	124300	124554	99.965	265	5	99.821	8	2.25	6	34.167
296	a0012J16	22,3,34,52,63,67,90	171811	82752	61	2	74	85734	85734	169257	98.513	169257	171468	99.8	31	6	99.778	13	2.615	5	69.4
297	a0012K10	22,30,45,54,70,8,80	161082	82832	49	6	89	2837	25364	116609	72.391	116609	152189	94.479	203	18	98.604	92	11.75	28	41.679
298	a0012L02	22,34,42,59,6,72,81	147054	82766	49	1	89	147056	147056	147056	100.001	147056	147056	100.001	296	2	99.794	23	13.174	0	0
299	a0012L04	11,26,33,45,62,71,85	167133	82920	61	3	74	20333	54627	138435	82.829	138435	163883	98.055	30	8	99.102	8	100.75	29	23.966
300	a0012L22	13,17,28,46,58,77,90	151740	82488	49	8	89	153	18742	147299	97.073	147299	149939	98.813	451	23	97.505	57	51.544	33	25.697
301	a0012M02	23,34,5,51,61,77,86	133069	82612	43	7	95	166	18752	122959	92.402	122959	131266	98.645	438	17	95.59	100	55.36	8	41.5
302	a0012N01	1,14,38,47,54,72,88	157998	82206	61	1	74	157767	157767	157767	99.854	157767	157767	99.854	20	3	99.838	10	18.4	1	72
303	a0012N13	26,3,32,47,58,78,81	172146	83552	61	47	73	190	3078	14100	8.191	23431	144675	84.042	2330	138	74.349	360	104.397	154	42.688
304	a0012N19	22,27,47,56,6,67,80	195378	82474	49	1	89	195344	195344	195344	99.983	195344	195344	99.983	178	2	99.885	5	44.8	0	0
305	a0012O16	11,24,29,52,54,74,86	148621	82482	61	2	74	74335	74335	148543	99.948	148543	148670	100.033	10	3	99.874	5	9	2	71
306	a0012O17	19,3,33,45,55,76,82	166416	83122	61	1	75	166168	166168	166168	99.851	166168	166168	99.851	20	4	99.855	6	13.167	8	20.25
307	a0012O18	11,22,33,44,55,66,90	142245	82138	49	5	89	2912	28158	115759	81.38	115759	140794	98.98	30	9	98.188	32	64.5	16	32.062
308	a0012P10	14,37,48,5,60,73,87	97258	82768	43	13	94	910	7265	81553	83.852	81553	94454	97.117	665	31	85.019	162	76.926	145	14.538
309	a0013B07	10,17,35,51,65,77,87	179320	81782	55	8	81	269	22146	170861	95.283	170861	177170	98.801	584	22	97.546	75	46.013	26	36.538
310	a0013B13	13,22,36,42,53,69,90	149654	83660	43	3	95	138	49726	148933	99.518	148933	149179	99.683	115	10	99.369	38	13.553	10	43
311	a0013B17	10,26,36,40,64,69,81	143351	82762	55	4	82	10588	35268	119769	83.549	119769	141075	98.412	422	8	94.917	19	367.053	5	62.4
312	a0013C06	22,35,47,58,68,8,90	137609	83114	61	1	75	137159	137159	137159	99.673	137159	137159	99.673	30	6	99.728	5	36	12	16.167
313	a0013C19	24,30,51,61,7,73,87	169142	83038	61	2	74	84554	84554	168972	99.899	168972	169109	99.98	68	7	99.634	3	41	14	35.429
314	a0013D01	16,35,4,48,55,69,90	163168	83404	61	1	75	163008	163008	163008	99.902	163008	163008	99.902	77	6	99.45	11	18.636	21	33
315	a0013D18	18,28,4,47,62,73,80	158829	83002	43	1	95	155748	155748	155748	98.06	155748	155748	98.06	20	4	99.895	35	3.571	1	41
316	a0013E05	10,21,36,42,65,66,84	161479	82610	61	1	75	161571	161571	161571	100.057	161571	161571	100.057	389	4	99.805	8	18.125	5	34
317	a0013E12	22,30,44,64,7,77,83	170662	82828	49	2	89	85234	85234	159941	93.718	159941	170468	99.886	243	5	99.76	12	17.833	5	39.2
318	a0013F11	23,34,42,60,75,87,9	144671	82966	43	1	95	144643	144643	144643	99.981	144643	144643	99.981	95	4	99.869	4	21	4	26.25
319	a0013H04	18,27,45,5,59,69,88	153601	82970	43	6	95	181	25411	151600	98.697	151600	152471	99.264	291	19	92.906	156	60.801	29	48.69
320	a0013I01	22,28,40,58,69,86,9	117841	83146	67	5	68	7730	28965	105306	89.363	105306	144827	122.9	674	25	55.183	33	1371	15	504.667
321	a0013I16	13,22,39,51,58,73,83	143297	82768	55	3	83	5081	47631	137701	96.095	137701	142894	99.719	20	6	99.451	11	29.727	18	25.5
322	a0013J01	14,27,47,61,69,8,84	145298	82284	43	4	95	3012	35992	137840	94.867	137840	143970	99.086	463	13	92.751	31	331.258	5	52.6
323	a0013K04	15,3,34,47,54,68,89	167234	82520	61	3	74	48060	55612	118635	70.94	118635	166837	99.763	10	4	99.639	9	52.778	21	6.095
324	a0013K22	26,3,38,52,55,73,80	157528	82896	49	14	89	2184	10937	85225	54.101	85225	153128	97.207	491	37	95.715	84	53.774	66	33.833
325	a0013L09	11,14,35,48,53,76,91	148124	83012	43	2	95	72400	72400	140575	94.904	140575	144801	97.757	242	6	99.609	22	23.455	2	31.5
326	a0013M03	1,26,38,50,62,74,86	137544	82714	61	6	74	364	21554	117883	85.706	117883	129328	94.027	296	15	97.692	86	30.791	11	47.818
327	a0013M11	22,37,41,60,68,9,91	151489	82498	61	2	74	75250	75250	150328	99.234	150328	150500	99.347	20	7	99.708	8	5.875	7	56.571
328	a0013M15	10,25,27,42,57,72,87	150035	82634	61	1	75	149333	149333	149333	99.532	149333	149333	99.532	106	4	98.962	9	173.111	0	0
329	a0013O07	17,36,49,5,56,70,91	176947	82590	61	1	75	176981	176981	176981	100.019	176981	176981	100.019	58	2	99.972	7	5.429	1	11
330	a0013P01	19,3,38,47,59,74,79	171590	82766	43	6	95	154	28498	167122	97.396	167122	170991	99.651	320	15	98.184	92	24.424	18	48.278
331	a0013P03	14,37,51,56,78,8,91	138079	82746	61	1	74	138044	138044	138044	99.975	138044	138044	99.975	0	4	99.763	2	5	6	52.833
332	a0014E09	13,24,29,41,60,73,80	157752	83202	55	13	82	145	11977	139520	88.443	139520	155704	98.702	373	27	94.316	59	121.441	81	22.235
333	a0014F01	23,38,40,55,70,8,85	144844	83574	55	5	82	2929	28833	135940	93.853	135940	144165	99.531	542	11	97.755	11	257.545	26	16.115
334	a0014F08	15,36,44,65,7,73,81	148284	82826	37	27	98	176	5264	84606	57.057	84606	142129	95.849	2727	62	76.731	353	89.422	114	25.772
335	a0014F09	10,22,29,44,54,72,85	151446	82700	55	4	82	6649	37545	136753	90.298	136753	150180	99.164	765	13	97.752	31	98.387	9	39.333
336	a0014F13	12,21,30,52,61,70,79	165528	83232	43	10	95	2550	15859	124202	75.034	124202	158594	95.811	225	21	94.302	34	257.029	55	12.582
337	a0014G01	16,27,4,50,59,67,87	151793	82690	61	1	75	151767	151767	151767	99.983	151767	151767	99.983	0	1	99.982	4	6.75	0	0
338	a0014G06	26,32,50,54,6,70,85	142890	83146	61	1	75	142640	142640	142640	99.825	142640	142640	99.825	185	6	99.276	22	18.318	25	25.24
339	a0014G07	12,23,36,51,55,74,82	156852	82092	55	4	82	31997	38717	90764	57.866	90764	154868	98.735	435	25	97.209	44	45.682	104	22.76
340	a0014G15	12,24,35,45,54,75,82	158749	82342	43	3	95	137	52475	157171	99.006	157171	157426	99.167	40	9	99.058	15	61.333	38	15.132
341	a0014H19	14,39,41,5,59,67,91	182441	83334	61	1	74	179238	179238	179238	98.244	179238	179238	98.244	160	7	99.313	11	81.182	47	7.681
342	a0014I02	10,19,37,51,61,67,82	157267	83786	61	1	74	157315	157315	157315	100.031	157315	157315	100.031	56	2	99.988	3	5	1	4
343	a0014J01	2,26,30,40,56,78,80	180753	83724	49	4	89	37023	44569	103996	57.535	103996	178278	98.631	50	9	99.442	29	16.379	17	31.412
344	a0014K20	1,21,29,51,61,72,84	140029	82542	55	5	83	1352	27859	131380	93.823	131380	139296	99.477	204	12	93.119	134	57.351	12	162.583
345	a0014L05	1,18,30,50,65,75,80	142212	82704	61	2	75	71114	71114	142049	99.885	142049	142229	100.012	10	5	99.508	6	29.667	12	43.417
346	a0014L09	19,38,40,64,71,87,9	136645	82878	55	2	82	68132	68132	77149	56.459	77149	136265	99.722	20	10	98.968	7	8	69	19.623
347	a0014L11	10,26,35,50,58,72,79	178407	83100	61	2	74	86902	86902	173677	97.349	173677	173805	97.421	266	10	98.907	17	97.235	15	19.8
348	a0014M17	10,15,39,43,53,69,91	156778	83404	61	1	74	156773	156773	156773	99.997	156773	156773	99.997	69	2	99.952	6	12.667	0	0
349	a0014N05	26,37,41,64,67,8,89	186840	82870	49	3	89	67662	61953	117987	63.149	117987	185859	99.475	222	11	99.003	21	80.19	4	44.5
350	a0014N13	11,15,28,50,55,69,79	139744	82514	49	3	89	33720	44880	94978	67.966	94978	134641	96.348	10	8	99.561	12	12.75	22	20.909
351	a0014N16	25,30,49,56,77,8,86	172089	82914	61	1	74	167974	167974	167974	97.609	167974	167974	97.609	170	7	98.608	11	212.364	1	59
352	a0014O04	21,27,3,47,55,77,87	142491	82542	55	3	82	6029	46179	131680	92.413	131680	138538	97.226	30	7	97.709	18	175.444	2	53
353	a0015B24	21,38,43,5,62,69,90	162616	83074	55	1	82	162589	162589	162589	99.983	162589	162589	99.983	0	1	99.983	2	14	0	0
354	a0015C08	1,22,28,45,60,73,84	153457	83222	37	7	99	1382	21503	139206	90.713	139206	150525	98.089	834	18	92.181	174	64.592	76	10
355	a0015C10	25,34,47,64,7,72,84	140875	83438	55	1	82	140745	140745	140745	99.908	140745	140745	99.908	40	4	99.693	6	22	40	7.525
356	a0015E02	1,18,38,48,61,77,83	170654	82940	43	18	94	815	8725	106267	62.27	106267	157065	92.037	1187	38	76.538	92	428.272	26	24.5
357	a0015E14	13,25,36,46,55,76,83	136401	83574	55	1	82	136383	136383	136383	99.987	136383	136383	99.987	0	1	99.985	2	10	0	0
358	a0015F08	12,25,27,44,63,71,81	163284	82732	55	4	82	139	40685	162349	99.427	162349	162742	99.668	50	11	99.342	56	2.768	48	19.146
359	a0015F12	1,23,33,44,56,69,83	158229	83352	55	2	82	79015	79015	157822	99.743	157822	158030	99.874	328	7	95.738	18	363.278	3	68
360	a0015F16	1,23,32,41,63,72,81	135123	82768	61	1	74	135117	135117	135117	99.996	135117	135117	99.996	0	1	99.995	2	3.5	0	0
361	a0015G07	2,26,34,52,54,66,88	174106	82422	43	9	95	10846	19069	94023	54.003	94023	171628	98.577	346	23	97.05	66	59.636	100	12
362	a0015G16	1,20,36,49,59,66,83	164532	83366	61	2	74	82087	82087	164013	99.685	164013	164174	99.782	353	6	99.385	23	37.043	1	160
363	a0015G17	25,29,3,41,61,76,86	158139	82878	49	5	89	1982	31502	140391	88.777	140391	157511	99.603	423	18	95.45	87	70.08	48	22.875
364	a0015G22	26,39,47,63,74,8,80	146996	83554	31	12	99	128	11928	127691	86.867	127691	143136	97.374	1144	24	84.368	108	208.639	8	55.75
365	a0015H12	18,38,42,56,67,8,88	203560	83020	55	2	82	101309	101309	193141	94.882	193141	202618	99.537	315	13	96.925	63	78.349	70	18.914
366	a0015I01	11,16,29,50,53,77,83	159818	82928	61	7	74	184	22652	144423	90.367	144423	158564	99.215	789	23	93.875	105	62.6	93	34.581
367	a0015J12	25,31,50,56,6,75,81	154211	82876	31	3	99	9063	51011	143804	93.251	143804	153035	99.237	359	12	95.387	207	29.986	5	181.2
368	a0015K07	1,23,36,40,61,73,89	157060	82842	61	3	74	58130	51775	93859	59.76	93859	155327	98.897	0	9	99.357	9	25.556	32	24.375
369	a0015L04	2,24,34,45,57,70,84	148174	82548	55	4	82	2367	37013	143155	96.613	143155	148053	99.918	550	12	99.021	45	23.889	8	46.875
370	a0015L22	17,39,45,5,61,74,84	133159	82528	61	12	74	1212	10911	72305	54.3	72305	130939	98.333	377	36	97.119	84	14.488	93	28.161
371	a0015M13	21,36,52,56,7,74,80	155215	83008	61	1	74	155197	155197	155197	99.988	155197	155197	99.988	10	3	99.841	5	5.8	2	109
372	a0015N13	12,24,31,46,56,74,87	143523	82764	61	15	73	934	9209	71397	49.746	71397	138139	96.249	1015	36	86.762	104	161.375	188	11.793
373	a0015O10	13,23,34,46,59,73,88	167754	82022	55	2	82	83876	83876	167623	99.922	167623	167753	99.999	45	7	99.584	15	14.467	18	26.722
374	a0015O16	11,21,36,43,55,72,81	179576	83066	61	5	74	575	35564	170818	95.123	170818	177823	99.024	302	13	96.558	48	103.542	18	67.278
375	a0016A18	2,20,27,49,60,73,88	172190	82614	61	28	73	353	5028	74822	43.453	74822	140794	81.767	1436	93	83.588	297	83.896	65	51.431
376	a0016A19	10,23,32,50,64,74,80	161045	83112	61	3	74	3655	53472	156624	97.255	156624	160416	99.609	254	11	99.402	44	16.091	12	21.25
377	a0016C21	25,31,52,62,74,8,88	144912	82304	55	14	82	223	9157	112774	77.822	112774	128206	88.472	1949	42	76.918	108	299.926	64	16.516
378	a0016D02	13,26,35,40,54,77,83	157830	82688	61	7	74	1172	22216	145594	92.247	145594	155516	98.534	163	12	95.349	28	217.393	36	34.806
379	a0016D21	13,22,31,40,62,71,80	149603	82844	49	2	89	74168	74168	138750	92.745	138750	148336	99.153	495	8	98.842	61	17.852	7	91.857
380	a0016E18	10,22,35,49,64,67,84	185876	82976	61	5	74	5536	36352	111058	59.748	111058	181764	97.788	404	17	97.397	48	94.292	10	31.3
381	a0016E22	14,37,52,59,71,88,9	139244	82662	61	5	74	4481	27462	124130	89.146	124130	137310	98.611	236	14	98.393	111	3.874	53	34.094
382	a0016F01	12,19,27,49,59,70,82	157683	82094	49	4	89	228	39170	156089	98.989	156089	156683	99.366	100	10	98.12	20	136.85	6	37.833
383	a0016G03	17,28,41,56,73,79,8	160646	82634	55	5	82	627	31856	147521	91.83	147521	159281	99.15	524	9	91.954	19	655.737	19	24.579
384	a0016G12	15,35,43,65,75,86,9	152737	82400	55	1	82	152734	152734	152734	99.998	152734	152734	99.998	134	2	99.909	7	19.857	0	0
385	a0016H18	2,26,33,49,61,69,86	151937	82630	49	17	89	203	8560	40680	26.774	59419	145521	95.777	853	48	95.767	247	13.794	104	29.077
386	a0016I12	10,16,33,48,61,72,81	148088	82678	49	5	88	1224	29052	142071	95.937	142071	145260	98.09	40	13	97.815	117	18.915	35	29.2
387	a0016I24	23,36,44,5,60,71,90	121862	82586	61	4	75	5326	28379	100683	82.621	100683	113519	93.154	20	11	98.45	45	16.467	41	28
388	a0016L04	26,28,51,56,6,69,90	166586	82970	49	5	89	219	33139	130798	78.517	130798	165696	99.466	376	14	98.883	51	27.784	5	88.6
389	a0016L16	11,17,30,50,64,72,87	149850	82832	49	12	89	694	11946	53789	35.895	56546	143359	95.668	1064	21	87.534	60	302.383	16	33.562
390	a0016O02	12,14,38,45,61,73,81	167974	83096	61	3	74	10976	55841	156324	93.064	156324	167524	99.732	516	8	99.474	20	31.25	7	37
391	a0016O04	1,23,29,45,58,68,88	157457	83186	61	1	74	157443	157443	157443	99.991	157443	157443	99.991	0	1	99.99	2	7.5	0	0
392	a0016P20	17,3,39,43,55,75,90	154296	82846	55	1	82	153727	153727	153727	99.631	153727	153727	99.631	263	5	99.371	12	80.667	1	3
393	a0017A08	2,26,38,51,65,67,83	164774	83126	49	3	89	9593	52745	146125	88.682	146125	158237	96.033	296	8	99.224	37	25.351	10	34.1
394	a0017A23	24,31,5,52,61,71,82	153232	82852	49	2	89	76677	76677	153250	100.012	153250	153354	100.08	113	3	99.952	16	2.188	1	39
395	a0017C10	22,33,52,53,6,75,79	167753	83032	43	7	94	270	23555	162379	96.796	162379	164885	98.29	270	12	97.456	50	74.68	31	17.194
396	a0017C24	10,20,31,43,56,70,85	120741	82550	61	2	74	59861	59861	115102	95.33	115102	119723	99.157	268	6	99.526	7	64.857	2	59
397	a0017D05	2,24,35,48,63,67,86	161584	82576	43	54	89	188	2303	72087	44.613	72087	124377	76.974	1322	166	79.67	422	61.104	353	20.011
398	a0017D10	11,23,29,42,62,76,84	156624	82592	43	12	95	180	12804	137680	87.905	137680	153652	98.102	910	28	90.685	82	162.768	99	12.545
399	a0017F01	12,16,36,46,59,75,81	183205	82574	37	3	99	159	61039	182825	99.793	182825	183119	99.953	40	6	99.62	16	25.562	9	32
400	a0017F04	23,30,41,56,7,75,85	150938	82564	55	6	82	3473	25112	132218	87.598	132218	150676	99.826	420	16	98.271	9	88	130	13.985
401	a0017H15	21,27,52,57,68,8,85	156214	83158	61	5	74	4349	30720	140888	90.189	140888	153600	98.327	45	12	98.639	30	33.067	98	11.571
402	a0017H22	25,34,48,54,78,8,81	156310	82878	61	3	74	233	52041	155730	99.629	155730	156125	99.882	182	9	99.3	39	16.359	8	57
403	a0017I08	11,19,28,51,62,74,87	148645	82352	61	1	74	148683	148683	148683	100.026	148683	148683	100.026	74	2	99.974	6	6.333	0	0
404	a0017J09	17,37,43,61,78,81,9	166278	83714	61	4	75	17829	40634	126599	76.137	126599	162538	97.751	339	8	98.913	138	9.725	5	93
405	a0017J18	16,28,4,40,65,77,89	157865	82936	61	26	73	526	5377	92204	58.407	92204	139823	88.571	2110	60	78.353	146	228.253	19	44.632
406	a0017K04	12,21,39,40,63,69,84	166727	82806	61	1	74	166602	166602	166602	99.925	166602	166602	99.925	214	6	99.472	10	49	10	39.1
407	a0017K18	12,23,37,41,61,71,84	166308	82992	43	1	95	166217	166217	166217	99.945	166217	166217	99.945	105	3	99.823	13	22.615	0	0
408	a0017L05	23,29,50,6,60,72,86	168740	83046	55	5	82	1548	33352	153790	91.14	153790	166764	98.829	191	14	97.523	30	72.467	222	9.036
409	a0017L09	23,33,48,5,55,67,84	143402	82488	61	1	75	143371	143371	143371	99.978	143371	143371	99.978	114	7	99.261	4	4.5	27	38.593
410	a0017L20	22,34,41,5,56,66,84	169046	82910	49	5	89	23543	33788	97689	57.788	97689	168942	99.938	30	12	99.21	27	8.889	43	25.488
411	a0017M18	19,33,47,5,61,75,89	162532	82442	61	3	74	808	53661	159993	98.438	159993	160984	99.048	588	11	96.396	35	156.4	11	34.909
412	a0017M21	1,21,34,40,65,70,81	170258	82712	31	14	99	1502	11465	82999	48.749	82999	160514	94.277	704	43	92.674	292	24.476	236	22.568
413	a0017N12	12,25,28,47,56,68,83	164693	83106	61	2	75	82015	82015	153101	92.961	153101	164030	99.597	346	7	99.657	17	6.118	12	38.417
414	a0017N18	15,27,41,5,57,75,82	156502	82252	49	1	89	156485	156485	156485	99.989	156485	156485	99.989	10	1	99.978	4	8.75	0	0
415	a0017P18	19,29,49,53,6,67,91	155104	82284	55	2	82	77521	77521	137026	88.345	137026	155043	99.961	471	7	98.747	21	75.905	17	20.529
416	a0018A20	19,35,43,56,74,8,84	150018	83118	61	2	74	75076	75076	150023	100.003	150023	150153	100.09	34	4	99.867	5	4.2	5	35.8
417	a0018B02	10,17,39,50,63,78,82	159937	83012	37	19	99	246	7992	87540	54.734	87540	151850	94.944	608	30	85.216	124	183.419	17	53
418	a0018B06	11,20,28,48,54,72,89	174693	83108	43	10	95	1024	16884	129227	73.974	129227	168849	96.655	1233	22	94.454	112	78.045	26	36.462
419	a0018B12	11,16,28,47,60,67,81	171629	82852	55	5	82	171	34336	170840	99.54	170840	171681	100.03	201	13	98.727	58	25.655	32	21.781
420	a0018B14	16,31,51,6,63,67,89	154164	82568	37	5	99	175	30762	153226	99.392	153226	153810	99.77	396	14	98.699	60	23.617	15	39.267
421	a0018B16	13,26,36,43,60,74,85	164627	83628	55	29	82	218	4644	32744	19.89	46892	134676	81.807	1863	67	68.874	170	280.859	225	15.533
422	a0018B17	14,29,51,54,6,77,81	147088	83018	55	15	82	189	9640	115858	78.768	115858	144608	98.314	919	29	93.174	46	183.109	59	27.407
423	a0018C10	1,21,37,49,57,74,87	159394	82814	61	2	74	79302	79302	158446	99.405	158446	158604	99.504	369	9	97.345	16	251.25	6	35.333
424	a0018D02	11,22,27,52,58,71,91	177550	83062	49	4	89	3255	44314	170639	96.108	170639	177258	99.836	155	8	99.315	51	19.667	8	26.625
425	a0018D06	13,19,30,46,54,67,85	178736	82370	37	7	99	371	24816	160787	89.958	160787	173715	97.191	359	20	94.92	65	136.923	8	22.5
426	a0018D10	22,27,3,44,60,75,89	157473	82324	61	1	74	157476	157476	157476	100.002	157476	157476	100.002	10	3	99.555	3	1.667	20	34.75
427	a0018D21	1,15,32,52,62,75,91	162539	82784	61	3	74	5503	52846	150169	92.39	150169	158540	97.54	40	7	99.086	14	88.357	4	62.25
428	a0018D23	24,3,34,46,60,76,81	140160	82760	61	7	74	713	19249	123889	88.391	123889	134748	96.139	267	17	97.907	58	37.69	29	25.793
429	a0018E15	13,25,31,44,64,78,86	173451	83242	49	6	89	144	28796	164942	95.094	164942	172776	99.611	517	16	95.843	41	151.878	51	19.294
430	a0018E19	13,25,29,51,65,71,82	147091	83486	61	1	75	146446	146446	146446	99.561	146446	146446	99.561	20	7	99.398	32	3.281	111	7.036
431	a0018F03	1,14,35,51,62,68,82	154645	82888	61	1	74	154678	154678	154678	100.021	154678	154678	100.021	208	2	99.883	4	45.25	0	0
432	a0018F14	20,36,4,52,55,71,87	190804	83184	49	38	89	248	4613	45738	23.971	47472	175305	91.877	2565	103	85.984	338	62.37	212	26.712
433	a0018F15	12,26,33,46,65,77,82	148260	83560	49	8	89	218	18398	142733	96.272	142733	147188	99.277	162	18	98.731	31	23.516	36	32
434	a0018G08	10,21,34,49,53,72,80	150917	83606	61	2	75	74936	74936	149361	98.969	149361	149872	99.308	672	7	98.815	26	63.077	4	37
435	a0018G12	22,31,49,63,73,79,9	163575	82312	37	24	98	142	6639	115263	70.465	115263	159344	97.413	1104	47	93.776	181	41.094	124	22.121
436	a0018H01	18,30,44,60,78,8,85	154821	82142	61	2	75	77475	77475	154804	99.989	154804	154950	100.083	0	4	99.66	3	6	9	56.444
437	a0018H08	1,22,27,42,54,76,82	152539	82596	55	1	82	152482	152482	152482	99.963	152482	152482	99.963	180	6	99.702	7	15.857	14	24.571
438	a0018H09	14,30,44,56,66,87,9	155317	82996	49	9	89	3686	16393	125954	81.095	125954	147540	94.993	840	22	88.249	45	381.378	27	40.37
439	a0018H12	19,31,44,58,73,8,89	145907	83156	61	1	74	145933	145933	145933	100.018	145933	145933	100.018	60	2	99.975	5	7.4	0	0
440	a0018H20	23,31,43,59,6,66,90	161862	82550	49	7	89	161	22794	145447	89.859	145447	159561	98.578	325	18	98.847	56	12.196	39	30.359
441	a0018I09	25,3,35,46,58,71,85	178801	82604	37	6	99	255	29370	170359	95.279	170359	176221	98.557	207	12	94.919	80	109.25	22	15.682
442	a0018I10	1,24,39,46,58,75,84	149757	82542	55	3	82	5307	49867	144183	96.278	144183	149601	99.896	110	10	98.944	5	3.8	44	35.523
443	a0018I14	1,16,36,48,65,74,88	142062	83042	61	1	75	142013	142013	142013	99.966	142013	142013	99.966	0	1	99.965	7	7.143	0	0
444	a0018I17	18,3,34,51,56,75,82	142552	83462	61	9	74	353	15448	102713	72.053	102713	139033	97.531	60	20	98.091	50	11.6	43	49.791
445	a0018I22	25,34,46,6,61,66,87	155139	82370	43	4	94	1876	38149	148726	95.866	148726	152596	98.361	152	6	98.258	10	270.2	0	0
446	a0018J06	23,38,51,6,62,71,91	173462	82388	49	2	90	86764	86764	173427	99.98	173427	173528	100.038	372	6	99.715	32	11.969	2	55.5
447	a0018J24	1,15,37,41,53,73,88	152604	82960	55	3	82	577	50341	150308	98.495	150308	151025	98.965	10	6	99.499	21	23.571	20	13.5
448	a0018K02	18,31,45,6,60,76,80	153263	83274	43	13	95	220	11414	113714	74.195	113714	148386	96.818	170	31	96.026	136	35.029	43	30.837
449	a0018K16	1,22,38,49,55,69,91	151104	82662	55	6	82	1681	24905	138625	91.741	138625	149432	98.893	135	12	99.044	17	58.706	20	22.35
450	a0018K18	12,20,28,49,57,78,86	155129	82890	49	5	89	11598	30907	128044	82.54	128044	154539	99.62	735	20	98.555	55	17.127	25	51.96
451	a0018K19	26,33,43,56,72,9,91	175706	83204	43	13	95	150	13437	147048	83.69	147048	174690	99.422	892	34	90.832	115	132.243	28	32.143
452	a0018K22	1,18,33,46,57,66,86	148283	82628	55	1	82	148298	148298	148298	100.01	148298	148298	100.01	141	5	99.715	15	8.267	14	21.357
453	a0018M08	10,25,36,43,59,71,79	149119	82868	61	1	74	149147	149147	149147	100.019	149147	149147	100.019	122	2	99.932	13	7.769	0	0
454	a0018M09	26,29,3,51,53,74,88	157381	83164	55	5	82	7561	31208	131892	83.804	131892	156040	99.148	830	16	94.88	60	129.3	3	100
455	a0018M12	23,3,30,50,57,77,84	172757	82674	49	3	89	125	44731	133944	77.533	133944	134194	77.678	70	11	99.512	41	5.976	13	46
456	a0018M18	23,28,47,54,6,75,84	161430	82546	55	2	83	80564	80564	161013	99.742	161013	161129	99.814	20	5	99.693	10	27.9	3	72.333
457	a0018M22	11,16,37,48,62,66,86	163579	83196	61	8	74	4658	19379	106387	65.037	106387	155037	94.778	170	23	93.227	72	127.569	47	40.319
458	a0018N12	12,17,31,41,60,75,86	177536	82694	37	8	99	2308	21452	146565	82.555	146565	171618	96.667	626	23	88.776	155	123.032	32	26.75
459	a0018N19	14,31,47,62,76,89,9	109545	83264	25	3	99	165	36655	109689	100.131	109689	109966	100.384	497	10	99.134	54	10.685	7	53.143
460	a0018O02	20,3,37,41,58,75,79	190742	83804	37	16	78	181	8941	129668	67.981	129668	143071	75.008	891	35	73.763	131	378.16	31	16.323
461	a0018O12	18,29,4,50,55,70,82	148557	83034	61	1	74	148484	148484	148484	99.951	148484	148484	99.951	228	4	99.426	13	65.615	0	0
462	a0018O14	18,34,4,52,59,68,79	153661	82272	55	5	82	205	30319	144989	94.356	144989	151598	98.657	535	13	93.117	38	272.237	7	33
463	a0018O16	19,29,3,46,57,75,87	150172	82860	61	7	74	4886	21117	51773	34.476	59543	147821	98.434	370	15	89.365	80	185.787	49	22.612
464	a0018O22	21,33,4,40,55,78,83	147333	83834	61	1	75	146691	146691	146691	99.564	146691	146691	99.564	60	3	98.821	29	59.897	0	0
465	a0018O24	1,18,28,44,53,68,89	173534	82792	61	1	75	172685	172685	172685	99.511	172685	172685	99.511	317	5	98.883	10	183.8	2	50
466	a0018P20	12,23,33,42,63,70,89	185417	83212	49	4	89	9723	46002	164440	88.687	164440	184008	99.24	33	10	99.084	10	126.3	13	33.462
467	a0019A05	14,32,4,45,53,69,80	75929	83220	31	1	99	76011	76011	76011	100.108	76011	76011	100.108	48	4	99.759	18	7.222	1	53
468	a0019B19	10,15,32,48,63,77,90	173055	83664	55	3	82	147	57601	172518	99.69	172518	172805	99.856	305	6	99.277	10	110.5	1	146
469	a0019C03	22,31,47,57,7,74,85	172000	82016	61	1	75	171970	171970	171970	99.983	171970	171970	99.983	127	7	99.398	5	2.4	27	37.889
470	a0019C14	16,34,50,64,76,86,9	166782	83190	55	2	82	83305	83305	166473	99.815	166473	166610	99.897	70	4	99.054	19	83	0	0
471	a0019C23	13,14,27,52,63,73,82	174617	82842	61	4	75	153	43580	173878	99.577	173878	174323	99.832	10	9	99.478	7	2	9	99.667
472	a0019D11	10,16,31,42,62,78,90	163033	82938	61	5	74	1260	31911	151024	92.634	151024	159558	97.869	563	10	94.677	24	349.083	6	50.167
473	a0019D16	20,29,45,5,55,72,83	158028	82956	55	1	82	158098	158098	158098	100.044	158098	158098	100.044	283	3	99.754	14	27.714	0	0
474	a0019E01	2,25,39,44,53,66,83	174210	83252	37	5	99	13742	34534	137361	78.848	137361	172670	99.116	480	10	96.422	24	254.208	8	16.5
475	a0019E08	1,17,34,52,58,78,86	158109	82496	37	10	99	188	15413	122164	77.266	122164	154134	97.486	1029	22	93.291	86	116.105	27	23.037
476	a0019E18	14,3,37,46,54,74,80	153313	82922	43	7	95	8060	21277	107759	70.287	107759	148940	97.148	1007	15	89.348	96	159.719	48	20.792
477	a0019F01	1,24,36,50,53,71,91	151706	82282	61	2	75	75699	75699	126180	83.174	126180	151399	99.798	30	8	97.924	132	1.447	171	17.298
478	a0019F03	12,22,33,45,58,72,87	184878	82814	61	3	75	10871	61315	172927	93.536	172927	183947	99.496	227	9	99.285	26	32.692	10	47.1
479	a0019F08	12,14,37,42,55,76,79	191738	82940	31	12	98	440	15415	115926	60.461	115926	184991	96.481	1448	29	94.072	187	59.631	10	21.6
480	a0019F12	14,27,45,55,6,70,90	177028	82894	55	9	82	5682	19548	119212	67.341	119212	175938	99.384	757	30	93.937	115	72.496	59	40.61
481	a0019G03	10,20,30,40,63,73,83	142337	82992	43	8	95	2986	17264	109716	77.082	109716	138114	97.033	822	18	86.33	124	154.056	10	35.5
482	a0019G14	20,38,47,6,60,77,85	180077	83466	61	3	74	5035	59920	174311	96.798	174311	179762	99.825	659	9	94.711	10	949.9	1	26
483	a0019G21	26,33,42,53,66,8,81	169465	82568	61	1	75	169519	169519	169519	100.032	169519	169519	100.032	28	4	99.823	2	4	11	26.545
484	a0019I07	24,27,44,62,68,88,9	164108	82836	49	3	89	10724	54319	150693	91.826	150693	162957	99.299	30	7	98.623	23	93.478	4	27.5
485	a0019I18	22,33,4,50,60,76,85	157678	82654	61	1	74	157655	157655	157655	99.985	157655	157655	99.985	10	1	99.976	3	12.667	0	0
486	a0019J04	16,2,33,40,63,76,79	160962	82362	61	2	74	80448	80448	147149	91.418	147149	160897	99.96	332	6	98.987	68	22.015	2	67
487	a0019J19	11,22,28,42,64,68,80	167265	82858	49	7	89	426	23796	153763	91.928	153763	166577	99.589	697	23	98.413	53	19.075	59	27.847
488	a0019K13	20,34,50,55,75,8,84	142500	83154	61	1	75	142442	142442	142442	99.959	142442	142442	99.959	10	2	99.835	13	5.462	5	32.8
489	a0019K23	18,37,50,57,6,71,79	176992	82820	61	1	75	176107	176107	176107	99.5	176107	176107	99.5	85	4	99.333	7	154	1	102
490	a0019L01	11,26,36,41,54,75,91	181542	83354	61	1	75	181584	181584	181584	100.023	181584	181584	100.023	37	2	99.964	4	8	1	34
491	a0019L09	1,26,33,48,58,76,89	138106	82582	43	5	95	1787	26778	120208	87.04	120208	133893	96.949	649	16	96.531	69	61.391	21	26.429
492	a0019M04	15,38,52,57,66,79,9	157168	83832	55	1	82	157001	157001	157001	99.894	157001	157001	99.894	20	2	99.875	8	24.5	0	0
493	a0019O01	14,3,34,50,62,70,87	167605	82912	43	2	95	82988	82988	165809	98.928	165809	165976	99.028	52	9	99.346	88	6.386	16	33.375
494	a0019O03	20,32,44,56,68,8,80	160799	82746	55	1	82	160778	160778	160778	99.987	160778	160778	99.987	109	5	99.671	25	5.4	6	65.667
495	a0020C05	20,38,49,53,76,79,8	167725	82948	55	37	81	223	3879	74141	44.204	74141	143555	85.59	1637	105	74.709	378	97.132	206	27.689
496	a0020C18	17,31,50,61,77,8,85	175345	83844	37	8	99	223	21371	145166	82.789	145166	170975	97.508	553	22	95.21	327	19.578	35	57.057
497	a0020D06	24,38,4,46,61,70,86	185553	83002	55	4	82	344	46076	183462	98.873	183462	184304	99.327	766	15	95.396	33	245.121	15	30.2
498	a0020F20	16,3,37,40,64,70,84	170382	83460	61	5	74	35824	34137	49444	29.019	70695	170685	100.178	247	14	97.837	156	1.833	80	42.5
499	a0020F21	11,17,36,42,61,67,86	164140	83198	55	14	82	173	10395	123311	75.126	123311	145540	88.668	749	25	85.235	112	211.821	12	42.583
500	a0020H14	11,23,34,44,53,74,81	185623	82122	55	2	82	92393	92393	183017	98.596	183017	184787	99.55	46	5	99.159	6	184.5	21	21.667
501	a0020I08	16,34,46,5,65,78,85	161603	82490	49	4	89	37158	38709	80420	49.764	80420	154838	95.814	20	14	99.224	29	10.655	36	26.25
502	a0020J10	10,22,28,41,61,75,83	154897	82990	61	6	74	9564	25784	95723	61.798	95723	154704	99.875	314	18	97.935	26	9.923	75	39.213
503	a0020M24	12,18,29,45,53,66,84	164242	83594	55	1	82	164202	164202	164202	99.976	164202	164202	99.976	0	1	99.957	41	1.707	0	0
504	a0020O07	17,33,40,5,64,66,85	166893	82448	61	1	74	166783	166783	166783	99.934	166783	166783	99.934	73	3	99.889	3	62	0	0
505	a0021A02	17,29,41,5,53,78,90	148941	82784	61	1	74	148917	148917	148917	99.984	148917	148917	99.984	0	1	99.983	2	12.5	0	0
506	a0021B13	12,15,37,52,60,74,81	147576	82568	37	11	99	203	13217	101046	68.47	101046	145393	98.521	1267	21	95.213	79	70.456	134	11.179
507	a0021B20	26,27,47,5,60,66,91	146416	82698	55	2	82	72750	72750	134771	92.047	134771	145501	99.375	143	4	99.837	14	2.071	4	52.25
508	a0021B21	25,34,45,5,58,73,90	166755	81830	55	1	83	166743	166743	166743	99.993	166743	166743	99.993	0	1	99.992	3	4.333	0	0
509	a0021E22	20,31,5,51,54,66,87	148312	82414	61	3	74	24551	49160	122670	82.711	122670	147481	99.44	20	9	99.183	15	4	27	42.667
510	a0021F22	26,30,46,61,75,8,88	181485	83472	61	15	74	234	11643	146427	80.683	146427	174652	96.235	1492	35	85.858	160	151.106	23	64.696
511	a0021H03	12,15,32,50,56,76,84	139921	81756	61	3	75	4293	46675	135602	96.913	135602	140026	100.075	107	8	99.556	27	2	10	56.7
512	a0021H13	12,19,30,45,64,74,88	148461	82744	55	12	82	2358	11407	98061	66.052	98061	136891	92.207	346	25	90.255	72	179.917	67	22.582
513	a0021H14	14,2,28,44,62,69,91	155200	83422	55	5	82	500	31013	153145	98.676	153145	155067	99.914	462	13	99.222	16	52.062	13	28.846
514	a0021J16	1,24,34,44,54,77,87	169987	83654	43	4	95	149	41342	164970	97.049	164970	165369	97.283	141	11	97.501	55	69.618	10	41.9
515	a0021J21	24,34,51,62,67,79,8	129925	82762	37	5	99	151	25257	125405	96.521	125405	126285	97.198	508	15	96.62	54	72.481	21	22.762
516	a0021L01	19,29,50,56,7,73,88	171293	82904	61	1	74	171574	171574	171574	100.164	171574	171574	100.164	427	6	99.906	15	10.733	0	0
517	a0021M16	2,24,39,47,61,68,81	161603	82426	61	6	74	1949	26845	134334	83.126	134334	161072	99.671	492	18	91.933	133	70.744	208	17.438
518	a0021N12	17,39,47,54,7,73,91	140118	82648	55	3	82	8255	46570	131281	93.693	131281	139710	99.709	30	7	99.517	26	5.923	8	65.375
519	a0021O04	15,38,49,6,61,74,88	135643	83036	55	10	82	389	13410	116354	85.78	116354	134107	98.868	96	22	96.226	55	70.909	37	32.946
520	a0021P15	12,24,28,50,64,70,81	166585	82962	61	2	74	82789	82789	165366	99.268	165366	165578	99.396	154	8	98.871	27	67.222	2	32.5
521	a0022A08	20,37,47,63,72,87,9	165596	82436	37	2	99	82505	82505	160336	96.824	160336	165011	99.647	50	8	99.52	22	30.818	3	39
522	a0022A11	14,36,49,53,74,86,9	150555	82718	61	2	74	75145	75145	150153	99.733	150153	150290	99.824	248	4	99.501	8	86.5	1	59
523	a0022B15	24,30,4,48,65,68,83	174474	82748	61	1	74	174604	174604	174604	100.075	174604	174604	100.075	234	5	99.945	5	14.6	1	23
524	a0022C04	10,26,33,44,59,78,88	130838	82836	43	2	95	65574	65574	131022	100.141	131022	131148	100.237	664	8	99.343	96	8.177	2	37
525	a0022C05	13,19,33,42,59,71,91	167139	83138	61	7	74	906	22807	140558	84.096	140558	159650	95.519	465	18	94.674	54	154.685	11	49.909
526	a0022C08	1,16,35,45,59,77,86	149833	83444	61	1	74	149601	149601	149601	99.845	149601	149601	99.845	20	6	99.595	9	2	19	31
527	a0022C09	26,37,40,61,7,74,79	183273	82458	61	7	74	143	25802	121340	66.207	121340	180619	98.552	220	18	98.382	36	73.583	10	31.6
528	a0022C12	12,26,39,51,62,72,81	162673	82392	61	1	74	162720	162720	162720	100.029	162720	162720	100.029	20	4	99.442	5	9	29	29.759
529	a0022D07	11,19,35,46,65,66,88	171199	82850	55	10	82	2551	16793	103988	60.741	103988	167931	98.091	997	29	92.152	122	88.197	75	35.68
530	a0022D15	11,14,27,50,57,74,88	149357	82484	61	2	74	74654	74654	149153	99.863	149153	149309	99.968	89	7	98.986	16	56.75	14	43.286
531	a0022E06	2,21,28,49,58,68,79	140477	82096	49	7	89	2135	19871	102174	72.734	102174	139103	99.022	663	15	89.128	55	274.909	6	25.333
532	a0022E19	20,33,44,5,53,73,91	187014	82982	31	12	99	452	14024	98378	52.605	98378	168289	89.987	1214	30	83.29	202	151.748	14	42.643
533	a0022E22	16,30,50,63,69,8,81	138717	82934	43	4	95	10432	33810	114234	82.35	114234	135243	97.496	334	11	99.358	19	24.947	12	34.667
534	a0022I16	19,34,41,53,70,79,9	150225	83750	31	10	97	451	14437	123274	82.06	123274	144376	96.107	322	21	93.868	38	237.026	8	25.625
535	a0022I22	15,28,47,59,77,8,88	136709	83108	43	5	95	5449	26604	101477	74.228	101477	133021	97.302	312	14	94.938	227	20.388	39	58.769
536	a0022I23	13,20,30,43,59,78,87	163647	83044	61	2	74	81845	81845	157234	96.081	157234	163691	100.027	128	7	99.392	7	36.429	68	10.882
537	a0022K23	19,27,42,5,64,67,90	144358	82838	55	3	82	8886	47702	133661	92.59	133661	143108	99.134	60	7	99.173	20	52.35	5	29.4
538	a0022L15	19,2,28,42,61,72,88	151838	82830	55	42	81	155	3023	25432	16.749	55249	126981	83.629	2215	120	80.555	532	46.4	166	29.157
539	a0022M03	20,27,40,59,6,71,89	162061	83384	61	1	74	162106	162106	162106	100.028	162106	162106	100.028	34	4	99.822	4	4.5	7	38.571
540	a0022M18	2,24,28,40,60,75,85	180206	83320	49	2	89	89933	89933	173677	96.377	173677	179867	99.812	780	9	98.543	59	30.746	50	16.24
541	a0022N04	2,21,36,47,54,70,82	138578	82744	43	5	95	4688	26993	120785	87.16	120785	134968	97.395	567	16	97.763	77	34.558	19	23.105
542	a0022O01	19,37,46,5,59,76,84	147205	82642	43	3	95	189	48910	146420	99.467	146420	146732	99.679	399	10	99.349	23	17.957	25	21.84
543	a0022O03	13,23,31,50,54,69,82	144324	83248	55	1	82	144232	144232	144232	99.936	144232	144232	99.936	20	2	99.918	4	29.75	0	0
544	a0022P22	13,15,31,48,53,72,79	162344	83258	55	1	83	162201	162201	162201	99.912	162201	162201	99.912	199	5	99.819	6	44.167	2	14.5
545	a0023A13	2,22,39,40,64,72,90	178230	82882	43	13	95	794	13223	125389	70.352	125389	171900	96.448	889	32	91.973	151	86.887	36	32.944
546	a0023A18	11,25,39,40,54,68,82	134527	82204	61	1	74	134588	134588	134588	100.045	134588	134588	100.045	95	2	99.836	3	73.333	0	0
547	a0023B01	2,23,36,41,64,66,86	167731	83208	37	8	99	437	20782	126092	75.175	126092	166263	99.125	1008	23	97.581	98	30.153	129	8.543
548	a0023C12	1,25,30,42,61,74,81	162213	83442	43	2	95	79258	79258	153477	94.614	153477	158517	97.722	364	7	79.841	72	115.431	32	762.156
549	a0023D24	26,3,36,46,56,66,89	136708	82558	61	6	74	5480	22117	112158	82.042	112158	132707	97.073	136	13	97.621	12	219.667	9	68.444
550	a0023E15	17,28,40,53,67,7,82	162693	82410	49	1	89	162680	162680	162680	99.992	162680	162680	99.992	10	1	99.98	3	10.667	0	0
551	a0023F22	11,17,38,48,60,74,90	150262	82224	37	1	99	149790	149790	149790	99.686	149790	149790	99.686	327	7	99.133	54	23.426	3	12.667
552	a0023G01	18,38,5,52,60,75,84	178129	83602	55	2	82	88743	88743	167377	93.964	167377	177486	99.639	50	6	98.111	9	349.667	6	36.167
553	a0023H04	20,28,43,6,65,68,91	147894	83332	55	1	82	147473	147473	147473	99.715	147473	147473	99.715	50	3	99.664	11	45.182	0	0
554	a0023L18	21,31,4,47,56,71,79	139547	82384	31	1	99	139519	139519	139519	99.98	139519	139519	99.98	98	3	99.941	7	11.714	0	0
555	a0023L24	14,3,33,47,56,73,85	160369	83454	61	14	74	552	10529	37849	23.601	48286	147418	91.924	1455	37	93.771	70	118.343	72	23.694
556	a0024B20	10,25,31,41,55,73,82	144874	82086	61	5	75	251	28046	134181	92.619	134181	140231	96.795	451	15	90.348	42	309.119	26	38.462
557	a0024E04	17,33,44,63,77,86,9	69573	82570	37	1	99	69565	69565	69565	99.989	69565	69565	99.989	0	1	99.984	4	2.75	0	0
558	a0024K17	12,23,30,46,58,66,83	172465	82834	61	2	74	86146	86146	172169	99.828	172169	172293	99.9	209	7	99.663	58	3.793	6	60.167
559	a0024K18	22,31,48,60,67,8,82	145497	82910	55	1	82	144506	144506	144506	99.319	144506	144506	99.319	30	3	98.23	6	429.167	0	0
560	a0024O14	18,3,32,45,57,68,91	148823	83608	55	2	82	72996	72996	145828	97.988	145828	145992	98.098	40	5	96.139	56	102.607	0	0
561	a0024O15	17,33,43,60,71,8,89	152986	82380	55	2	82	76337	76337	152494	99.678	152494	152675	99.797	157	4	96.223	55	102.273	3	51
562	a0024P10	24,32,46,53,66,85,9	160870	83168	43	1	95	161004	161004	161004	100.083	161004	161004	100.083	228	2	97.017	14	342.786	0	0
563	a0024P16	13,19,37,41,57,72,86	141341	83146	61	4	74	7874	35020	124211	87.88	124211	140081	99.109	39	8	98.301	14	142.929	17	23.588
564	a0024P20	11,16,39,41,61,73,90	146160	82934	61	1	75	146149	146149	146149	99.992	146149	146149	99.992	0	1	99.992	2	6	0	0
565	a0025B14	15,3,39,49,58,66,86	142002	82576	61	3	75	8993	46008	120403	84.79	120403	138024	97.199	203	9	96.997	10	389.3	52	7.154
566	a0025D14	14,33,50,6,65,78,89	172983	82558	49	2	90	86333	86333	162146	93.735	162146	172667	99.817	277	5	96.752	4	1381	2	47
567	a0025F24	18,34,42,55,7,73,83	147402	83152	61	13	74	3127	10762	75733	51.379	75733	139910	94.917	750	43	92.065	178	39.933	126	36.413
568	a0025H20	10,20,38,51,59,75,86	138723	82812	31	3	99	175	46332	138672	99.963	138672	138997	100.198	565	11	99.224	80	8.662	15	25.6
569	a0025L11	10,26,30,48,54,74,82	200060	83610	55	1	82	199952	199952	199952	99.946	199952	199952	99.946	141	7	99.514	26	33.5	2	51
570	a0025L17	26,27,4,46,57,73,81	165564	82570	61	2	74	82960	82960	165788	100.135	165788	165921	100.216	535	5	99.629	15	31.333	2	72
571	a0025L19	17,27,51,63,76,8,90	161449	82396	61	2	75	77616	77616	138887	86.025	138887	155232	96.149	499	11	99.236	57	10.544	11	57.545
572	a0025N05	17,3,34,41,64,77,80	166083	84096	31	3	99	18899	55025	146058	87.943	146058	165077	99.394	260	13	99.097	34	35.206	28	10.786
573	a0026A19	26,32,40,63,75,89,9	141665	82702	37	3	98	51160	46617	88508	62.477	88508	139851	98.72	353	11	94.86	25	283.92	13	14.077
574	a0026B01	25,29,47,53,73,81,9	170734	83032	61	7	74	1594	23565	124260	72.78	124260	164959	96.618	414	16	90.56	41	392.366	1	30
575	a0026B03	1,17,37,48,63,69,79	160650	82474	43	2	95	78812	78812	157500	98.039	157500	157625	98.117	70	9	99.349	54	14.741	6	41.667
576	a0026C03	24,36,45,64,67,80,9	170984	82468	49	3	89	173	56825	170173	99.526	170173	170475	99.702	390	10	98.658	30	57.7	31	18.161
577	a0026C09	1,14,29,46,65,73,83	164640	82562	61	2	75	82207	82207	164250	99.763	164250	164414	99.863	58	7	99.473	42	6.024	4	153.75
578	a0026D13	13,25,27,45,53,77,91	189797	82318	37	3	99	5235	62588	182402	96.104	182402	187766	98.93	388	9	96.151	27	263.963	2	89.5
579	a0026E05	19,3,39,50,65,71,81	159868	82626	61	1	74	159704	159704	159704	99.897	159704	159704	99.897	169	3	99.91	5	27	1	9
580	a0026K03	16,28,43,61,69,7,80	174111	83370	61	8	74	7039	20975	89060	51.151	89060	167807	96.379	748	24	97.729	69	41.797	20	53.5
581	a0026M03	16,2,30,44,58,72,86	180011	82372	61	1	74	179525	179525	179525	99.73	179525	179525	99.73	386	7	99.467	6	153.333	3	13.333
582	a0027A05	19,39,43,57,68,89,9	144350	82114	55	5	82	13018	28866	101717	70.466	101717	144334	99.989	530	12	96.941	160	18.281	62	24.048
583	a0027B11	13,23,28,41,62,78,89	172637	83186	31	3	99	10427	56908	156461	90.63	156461	170725	98.892	184	7	99.513	36	21.472	6	11.333
584	a0027D05	1,25,37,50,64,66,82	155775	82870	61	1	74	155723	155723	155723	99.967	155723	155723	99.967	0	2	99.967	4	5.75	1	28
585	a0027D10	14,37,49,6,63,66,84	183722	83010	49	9	89	134	20153	170710	92.918	170710	181380	98.725	779	22	92.239	110	124.464	7	81.143
586	a0027D15	14,28,50,54,66,8,86	163623	82998	61	3	75	6919	54397	155633	95.117	155633	163191	99.736	145	11	98.873	27	9.148	22	72.591
587	a0027E21	1,19,27,51,65,69,89	164169	82998	61	5	74	209	32578	137472	83.738	137472	162890	99.221	60	12	94.955	21	375.19	10	40.3
588	a0027F06	12,24,36,48,60,72,84	180089	82462	55	5	82	15703	35188	98747	54.832	98747	175940	97.696	684	16	97.194	79	54.975	15	47.4
589	a0027F16	11,20,37,49,56,71,81	170120	81982	37	16	98	271	10129	139433	81.962	139433	162074	95.27	922	48	89.652	150	100.033	59	44.051
590	a0027F21	10,26,37,43,57,66,83	157709	83144	55	3	82	33249	52292	123507	78.313	123507	156876	99.472	451	10	97.759	17	199.588	4	35.5
591	a0027H13	13,23,30,47,61,72,80	155771	82344	55	4	82	17263	38591	113450	72.831	113450	154365	99.097	85	7	98.916	27	52.148	2	140
592	a0027H15	14,27,46,58,7,76,87	155175	82178	61	1	74	155264	155264	155264	100.057	155264	155264	100.057	244	2	99.776	10	34.7	0	0
593	a0027H20	10,16,27,43,64,77,82	156161	82920	49	4	89	2780	38924	150010	96.061	150010	155698	99.704	312	8	98.656	17	110.529	3	73.333
594	a0027H21	1,23,28,42,65,71,86	155962	82382	55	1	82	155962	155962	155962	100	155962	155962	100	10	1	99.987	4	5.25	0	0
595	a0027H24	19,32,4,43,65,72,90	160619	82580	61	3	75	5779	53416	153388	95.498	153388	160249	99.77	539	13	97.619	52	61.269	9	70.889
596	a0027I14	14,29,4,49,61,78,87	143458	83248	61	4	74	7952	27941	95714	66.719	95714	111765	77.908	336	16	81.287	49	530.082	9	96.889
597	a0027J05	10,22,27,51,55,78,81	153544	82930	49	2	89	76593	76593	148912	96.983	148912	153186	99.767	65	5	99.798	9	21.111	4	30
598	a0027J10	19,3,37,44,53,77,90	148425	82218	43	5	95	3088	29490	138195	93.108	138195	147450	99.343	652	14	91.814	42	286.31	2	62.5
599	a0027J20	21,31,51,55,69,8,80	160117	83302	61	12	74	237	13071	90796	56.706	90796	156855	97.963	1319	29	94.757	52	124.904	71	26.761
600	a0027J22	19,38,4,48,62,67,89	166649	82718	37	10	99	161	16556	155168	93.111	155168	165568	99.351	640	19	80.971	82	378.89	18	35.722
601	a0027K13	22,34,43,62,7,78,91	139706	83082	37	5	99	241	27833	127145	91.009	127145	139167	99.614	475	13	98.412	76	17.461	26	34.308
602	a0027K16	10,16,36,44,53,76,87	147395	82744	49	17	89	216	7294	23534	15.967	48673	123998	84.126	310	35	85.904	105	175.267	71	33.437
603	a0027L01	24,30,52,64,66,8,84	148360	82320	49	2	89	74255	74255	148378	100.012	148378	148511	100.102	181	3	99.962	7	6.714	1	10
604	a0027L02	17,39,48,57,66,8,88	146396	82836	61	2	75	73223	73223	146284	99.923	146284	146446	100.034	20	5	99.543	8	35.125	3	129.333
605	a0027L18	15,30,5,50,62,66,88	186182	83456	61	1	74	186308	186308	186308	100.068	186308	186308	100.068	296	4	99.906	6	29.167	0	0
606	a0027M05	20,32,45,59,74,9,90	138334	82882	61	3	74	44772	45842	75030	54.238	75030	137526	99.416	269	16	97.912	191	2.309	44	55.636
607	a0027O21	16,2,34,43,56,73,81	171759	82960	49	4	89	3354	42602	162675	94.711	162675	170409	99.214	837	12	97.722	25	145.88	9	29.556
608	a0027P01	26,3,31,44,65,68,79	146421	83004	55	11	82	3144	13017	74952	51.189	74952	143190	97.793	1232	33	92.384	113	71.735	140	21.757
609	a0027P24	25,31,4,48,63,76,87	158724	82902	55	3	82	974	52551	156490	98.593	156490	157653	99.325	47	5	99.131	11	98.636	46	6.413
610	a0028A06	1,14,28,43,59,76,81	158810	83020	43	5	95	4412	31507	139205	87.655	139205	157539	99.2	278	13	96.342	316	11.424	27	81.481
611	a0028A09	16,3,31,48,54,75,85	199669	83016	61	2	75	98040	98040	195808	98.066	195808	196080	98.203	680	11	86.257	15	1824.67	4	17.75
612	a0028C03	15,29,47,5,56,69,86	153929	82640	49	2	89	76812	76812	148384	96.398	148384	153625	99.803	20	5	99.826	6	22.167	4	33.75
613	a0028E05	10,16,37,47,59,73,89	145007	82744	61	1	74	144908	144908	144908	99.932	144908	144908	99.932	0	3	99.793	7	14.429	8	24.875
614	a0028F18	25,30,4,45,57,66,85	147030	82910	37	6	99	949	23976	98296	66.854	98296	143856	97.841	890	18	92.742	105	94.457	19	39.632
615	a0028G10	26,32,49,5,64,77,88	171498	82724	55	1	82	169882	169882	169882	99.058	169882	169882	99.058	208	3	96.268	6	1066.67	0	0
616	a0028H05	11,25,38,50,61,71,80	169139	82390	61	1	74	168775	168775	168775	99.785	168775	168775	99.785	68	3	98.731	4	533.75	1	11
617	a0028H09	19,2,34,47,58,67,87	160123	81928	49	5	89	115	31709	158096	98.734	158096	158549	99.017	90	12	93.065	44	239.386	14	40.857
618	a0028I23	1,21,35,43,58,67,83	148781	82166	61	6	75	825	24293	95477	64.173	95477	145763	97.972	660	20	96.025	138	16.413	88	41.466
619	a0028J07	19,28,49,56,75,80,9	162753	82732	37	2	99	81420	81420	162738	99.991	162738	162841	100.054	226	5	99.802	8	27.25	2	52
620	a0028L14	20,3,35,48,59,68,88	155754	82802	61	1	74	155684	155684	155684	99.955	155684	155684	99.955	141	2	96.697	10	514.4	0	0
621	a0028M03	16,27,42,61,71,85,9	144236	83050	25	11	99	1005	12938	117701	81.603	117701	142326	98.676	525	25	98.225	93	15.968	39	27.564
622	a0028M15	11,21,30,51,58,77,82	187315	83252	49	32	88	252	5418	106029	56.605	106029	173406	92.575	1998	89	86.891	203	100.261	148	28.392
623	a0028N04	10,17,38,47,57,68,80	145757	83608	61	1	75	145750	145750	145750	99.995	145750	145750	99.995	0	3	99.772	3	3	10	32.4
624	a0028O18	21,37,42,62,7,71,82	133059	82828	55	1	82	133035	133035	133035	99.982	133035	133035	99.982	10	1	99.965	15	3.067	0	0
625	a0029A05	16,39,4,47,53,70,85	189526	82648	55	9	82	2744	20858	155003	81.785	155003	187724	99.049	399	21	97.341	16	245.312	29	38.448
626	a0029B03	13,14,36,40,65,72,87	167319	83150	55	1	82	167183	167183	167183	99.919	167183	167183	99.919	444	7	99.093	12	90.917	24	17.792
627	a0029C06	17,2,35,43,54,68,85	155593	82052	61	2	74	77645	77645	155024	99.634	155024	155290	99.805	101	5	99.382	8	120.125	0	0
628	a0029C13	10,19,28,50,59,68,90	157984	83210	37	5	99	175	30771	148828	94.204	148828	153855	97.386	135	13	96.07	28	203.536	13	39.231
629	a0029C18	10,21,33,46,60,75,91	134422	83172	61	1	74	134216	134216	134216	99.847	134216	134216	99.847	10	2	99.946	3	4.667	1	59
630	a0029D03	12,26,34,49,58,74,84	155601	83068	37	27	94	183	5393	48172	30.959	62181	145625	93.589	2489	70	88.143	346	42.922	107	33.636
631	a0029D16	21,3,30,43,60,68,80	141085	82540	61	1	75	140977	140977	140977	99.923	140977	140977	99.923	30	2	99.897	11	13.273	0	0
632	a0029E09	16,3,36,50,58,73,82	159601	83516	37	7	99	9090	21214	94800	59.398	94800	148498	93.043	329	23	87.567	103	187.252	29	19.172
633	a0029E20	24,35,4,50,56,66,80	140242	83172	61	1	74	140123	140123	140123	99.915	140123	140123	99.915	10	7	99.308	5	16	20	44.55
634	a0029F01	16,35,51,64,7,74,81	149506	83104	61	1	75	149397	149397	149397	99.927	149397	149397	99.927	61	3	99.839	13	10.615	1	103
635	a0029F21	13,16,34,41,63,74,87	150077	82444	55	8	82	2218	17120	113743	75.79	113743	136965	91.263	627	18	89.609	141	95.099	13	168.077
[truncated: 1,563 more rows]

## Sheet: HV3-Assembly Stats (BAC-by-BAC)
HV3 Deconvoluted BAC Assemblies - Velvet
[truncated: 2,202 more rows]

## Sheet: HV3-U35 unigenes gits by BACs
Results of U35 BLAST Against HV3 BACs
[truncated: 10,906 more rows]

[truncated: 6 more sheets: HV4-Assembly Stats (BAC-by-BAC), HV4-U35 unigenes hits by BACs, HV5-Assembly Stats (BAC-by-BAC), HV5-U35 unigenes hits by BACs, HV6-Assembly Stats (BAC-by-BAC), HV6-U35 unigenes hits by BACs]
