# Supplementary material for: Combinatorial Pooling Enables Selective Sequencing of the Barley Gene Space
Source: PLoS Comput Biol. 2013 Apr 4;9(4):e1003010. doi: 10.1371/journal.pcbi.1003010 (PMC3617026; doi:10.1371/journal.pcbi.1003010)
Supplement: Dataset S5 — Excel file Dataset_S5 contains the Velvet assembly statistics for each individual pool of 169 BACs for the set HV5 in barley. For each pool, ten choices of -mer were tested in the range [25,79] with a step of 6. The spreadsheet reports only the assembly that maximized the N50. Column titled “K” shows the value of the -mer in the range which maximized the N50. Column “Cnt” shows the number of contigs produced by Velvet. Column “Used” reports the fraction of the reads used by Velvet. “Med”, “Mean”, “n50”, “max” show the median, mean, n50 and max contig size, respectively. Column “Sum” is the sum of the size of all contigs/scaffolds. “n50/Sz” and “Sum/Sz” report the size of the n50 and the sum over the expected BAC size. “Ns” report the total size of gaps in the scaffolds. (XLSX) [file pcbi.1003010.s005.xlsx]

## Sheet: Assem-50%
HV5 Pool Assemblies - Velvet
Kmers: 25-79, step 6 Kmer chosen by largest n50 Insert size: 269
Pool Data (Size = sum of BAC sizes)					Assembler Data
HV5 pool	Size	Reads	Bases	Covg	K	Cnt	Used	Med	Mean	n50	n50/Sz	Max	Sum	Sum/Sz	Ns
1	21583178	8588298	769517688	25.7	55	14489	79	300	1194	4651	0.022	43212	17311755	80.209	522603
2	22095658	5838315	512842627	25.7	37	15513	66	224	863	3726	0.017	42157	13396054	60.628	356007
3	22161490	5162088	461433789	25.7	37	15054	69	236	963	4361	0.02	38457	14508070	65.465	367316
4	21874686	4775432	427167170	25.7	31	13290	58	220	914	3776	0.017	56789	12150639	55.547	302222
5	21786521	3720423	333637238	25.7	37	14675	66	239	872	3384	0.016	35381	12805233	58.776	335357
6	21428022	4733035	423289790	25.7	43	14927	71	240	971	4158	0.019	40001	14505835	67.696	404945
7	21479742	4268210	380489586	25.7	37	14464	66	221	919	4270	0.02	46946	13303817	61.937	365209
8	21090670	3885961	347401745	25.7	31	11587	60	254	1019	4072	0.019	43403	11812543	56.008	277409
9	22565831	4394600	391868425	25.7	43	14628	73	242	983	4468	0.02	55442	14390704	63.772	386665
10	22425959	4541704	406125855	25.7	37	16935	65	221	773	2927	0.013	24666	13102558	58.426	336558
11	21282261	7845048	700071221	25.7	49	14138	76	237	1145	5548	0.026	74903	16201947	76.129	440099
12	22424787	4899224	438511897	25.7	37	15115	64	216	850	3657	0.016	36708	12859614	57.346	329066
13	22240241	9811586	878337258	25.7	55	12715	80	270	1405	7179	0.032	77001	17865166	80.328	507267
14	21322229	4165083	371089086	25.7	31	13860	50	220	793	2927	0.014	27508	10993589	51.559	244278
15	21311647	4946404	432420944	25.7	31	20352	51	227	711	2120	0.01	32964	14489729	67.99	333674
16	21517352	3529661	315012125	25.7	31	12589	59	251	919	3449	0.016	29495	11577737	53.807	268039
17	22101535	4271937	380375688	25.7	31	14668	57	214	779	2850	0.013	27303	11433180	51.73	218823
18	22188520	6885704	613725181	25.7	49	14539	78	242	1099	4890	0.022	82561	15991292	72.07	432709
19	21905245	7118903	634060836	25.7	49	13970	78	232	1190	5998	0.027	49288	16631539	75.925	465551
20	22080383	4436059	393715449	25.7	37	15370	68	215	896	4080	0.018	44738	13779966	62.408	340050
21	21901719	6065773	542021712	25.7	49	14834	76	254	1070	4777	0.022	69215	15880189	72.507	479697
22	22196755	4867587	433692350	25.7	37	14768	67	225	918	4078	0.018	38921	13568816	61.13	334953
23	22163838	7194596	642735537	25.7	43	17990	72	217	832	3441	0.016	33278	14985009	67.61	389769
24	22119177	5767493	513952604	25.7	43	16048	71	225	918	4338	0.02	60618	14732795	66.606	347199
25	21944034	4620823	412005972	25.7	31	14375	59	229	801	2971	0.014	29831	11520520	52.5	208130
26	21686612	4474730	397499501	25.7	37	14998	66	226	910	3881	0.018	37780	13656659	62.973	327109
27	21660745	2471316	221410608	25.7	25	9613	48	317	903	2512	0.012	23740	8681874	40.081	180174
28	21465632	5071479	445429023	25.7	37	13739	68	241	1001	4417	0.021	47764	13756866	64.088	426984
29	22461225	2748836	245783521	25.7	25	9375	48	316	978	2955	0.013	31583	9177387	40.859	202670
30	21860578	3969226	355679061	25.7	31	12377	58	252	915	3404	0.016	29597	11333184	51.843	295970
31	21936980	3693530	330145917	25.7	31	11866	59	269	988	3632	0.017	31268	11730934	53.476	300815
32	22299018	4487392	400436034	25.7	37	15220	68	224	901	4066	0.018	40699	13717846	61.518	318112
33	21169423	3364217	299964109	25.7	31	13747	58	235	792	2778	0.013	30227	10892891	51.456	193077
34	21167072	7045775	631585264	25.7	49	13948	76	252	1155	5513	0.026	50814	16110721	76.112	482425
35	21936981	3602076	320854164	25.7	31	12623	59	237	896	3652	0.017	57856	11313017	51.571	273753
36	22194398	2496637	222706872	25.7	25	11433	47	241	714	2000	0.009	18327	8166439	36.795	158554
37	22188527	6327525	565417660	25.7	43	15243	73	229	1011	4998	0.023	36480	15414547	69.471	442168
38	21511474	7830302	702128635	25.7	55	14021	77	297	1169	4295	0.02	45875	16390962	76.196	566348
39	22586993	6345077	567981811	25.7	49	15529	78	271	1075	4606	0.02	79864	16696236	73.92	458733
40	22166188	5615565	501684598	25.7	43	18394	71	212	808	3625	0.016	37371	14871828	67.092	297290
41	21531451	5621449	494635412	25.7	37	14824	64	231	900	3927	0.018	40772	13342266	61.966	405896
42	20967248	4053176	362895061	25.7	37	14867	67	235	898	3878	0.018	63365	13364491	63.74	360054
43	22006335	3922502	351380205	25.7	31	14006	59	222	827	3166	0.014	47411	11591975	52.676	280543
44	21919351	3087092	276751321	25.7	31	12340	61	256	913	3212	0.015	25407	11271654	51.423	272820
45	22525873	3134389	280280308	25.7	31	12979	58	241	865	3315	0.015	32570	11237403	49.887	282589
46	21338686	5032167	441577965	25.7	25	33189	47	201	424	795	0.004	43786	14091075	66.035	286307
47	22129749	4805295	430036591	25.7	37	13773	65	235	981	4668	0.021	40872	13514387	61.069	355536
48	21885264	2485715	220819284	25.7	25	10196	47	310	874	2413	0.011	24764	8915555	40.738	194112
49	22639888	6507436	581143448	25.7	49	16983	74	266	917	3226	0.014	40483	15588545	68.854	522752
50	22224960	7345901	656392115	25.7	43	15263	71	220	1004	5066	0.023	48128	15325840	68.958	411369
51	21516173	4629406	414403861	25.7	37	14413	64	223	939	4187	0.019	44829	13541622	62.937	376330
52	21587880	4198962	374871834	25.7	31	12960	56	228	931	3790	0.018	27974	12067422	55.899	280338
53	22588173	5766122	515595900	25.7	43	15715	70	239	948	4284	0.019	52164	14898560	65.957	430958
54	21627843	7924057	693641087	25.7	43	14664	71	221	1014	5052	0.023	52842	14877649	68.789	440225
55	22094486	5994640	534673014	25.7	49	13459	79	269	1202	5680	0.026	53547	16182457	73.242	496090
56	21322240	4423531	395546861	25.7	37	14260	67	238	900	3573	0.017	36031	12834542	60.193	384832
57	21578469	7822133	699738341	25.7	49	13262	78	259	1221	5636	0.026	61635	16206155	75.103	467556
58	21744210	6612156	590013210	25.7	43	14293	75	241	1116	5682	0.026	63695	15954947	73.376	484989
59	21817087	4577224	406937470	25.7	37	13980	68	231	968	4559	0.021	50474	13540248	62.063	391863
60	22193220	6746771	603323869	25.7	49	14136	77	260	1157	5455	0.025	69380	16358471	73.709	513949
61	22311940	6124175	545422654	25.7	43	15242	74	245	1038	5176	0.023	51011	15832743	70.961	469986
62	21980470	3649165	326299181	25.7	31	11726	60	274	949	3286	0.015	27038	11128683	50.63	287262
63	21793575	4938768	440179156	25.7	37	12827	69	237	1071	5028	0.023	40557	13746399	63.075	386209
64	21332808	4969989	444773026	25.7	31	11413	60	252	1041	4584	0.021	39417	11883363	55.705	313804
65	22054525	7515170	671061579	25.7	49	14392	75	249	1169	5761	0.026	98387	16837872	76.347	494237
66	21746566	4402825	390317665	25.7	37	17057	59	202	779	3363	0.015	37649	13299102	61.155	375076
67	22552900	5646683	491515933	25.7	31	14055	54	218	838	3519	0.016	28537	11788041	52.268	344493
68	21721872	8998648	798180214	25.7	49	14419	76	237	1172	6240	0.029	52352	16905511	77.827	494920
69	21469159	5252684	467028264	25.7	37	13796	69	250	990	4240	0.02	40388	13658254	63.618	372800
70	22110944	8866848	788965788	25.7	49	13511	78	239	1222	5685	0.026	52067	16513747	74.686	493338
71	21668984	9012184	800430290	25.7	55	13081	79	299	1330	5700	0.026	72775	17405552	80.325	623203
72	21497376	6493807	575094213	25.7	43	15309	73	242	1029	4885	0.023	57975	15764579	73.333	510550
73	21329281	6971198	621085394	25.7	43	14342	73	237	1051	5224	0.024	49552	15078608	70.694	458884
74	22624609	4730424	419582392	25.7	37	13453	68	248	1009	4349	0.019	37255	13578801	60.018	405545
75	21676035	3228801	287616300	25.7	31	12431	60	273	870	2673	0.012	47976	10816016	49.898	285992
76	21885264	11348381	1006323260	25.7	55	14788	78	248	1154	5417	0.025	52776	17074659	78.019	522363
77	22147377	9082378	802682426	25.7	49	15896	75	245	1033	4520	0.02	43282	16435329	74.209	497982
78	22008679	6327119	557443087	25.7	37	13246	66	228	1049	5366	0.024	40398	13896558	63.141	385874
79	22079207	4699815	420297811	25.7	37	13399	66	248	987	4372	0.02	37709	13228227	59.913	401545
80	21390402	4677178	409646736	25.7	37	14124	67	249	959	4083	0.019	33956	13551713	63.354	434674
81	22174409	6613038	588949947	25.7	43	14623	73	240	1058	5193	0.023	45149	15483753	69.827	464849
82	21483260	7416277	662094719	25.7	43	14507	74	235	1066	5099	0.024	46642	15465735	71.99	442893
83	22696312	4110789	367501977	25.7	37	15538	59	228	838	3337	0.015	39144	13031224	57.416	361019
84	22018093	9517977	848895625	25.7	55	12679	81	277	1398	6459	0.029	68805	17727450	80.513	579132
85	21730107	5091430	452294249	25.7	43	13640	73	253	1087	5077	0.023	45212	14838425	68.285	480141
86	21529104	5588354	498947041	25.7	49	12647	78	271	1266	6172	0.029	45773	16020635	74.414	507739
87	22476502	4151902	369688536	25.7	37	13669	68	239	1001	4516	0.02	42659	13683529	60.879	413347
88	21080090	4885873	437085359	25.7	43	13009	73	293	1098	4195	0.02	41534	14290012	67.789	490220
89	22127403	8655392	770231656	25.7	49	13585	76	232	1190	6167	0.028	68896	16179321	73.119	465714
90	21795926	4634359	415032865	25.7	31	11554	59	265	1032	4191	0.019	39318	11927164	54.722	343502
91	21858231	4819461	429544942	25.7	31	11136	58	260	1049	4662	0.021	57562	11682049	53.445	309910
AVERAGE	2.18799e+07	5.52735e+06	4.92232e+08	25.7	39.3736	14260.2	67.0549	244.275	987.198	4269.59	0.0195165	45515.5	1.39029e+07	63.5577	384331
