# Supplementary material for: Combinatorial Pooling Enables Selective Sequencing of the Barley Gene Space
Source: PLoS Comput Biol. 2013 Apr 4;9(4):e1003010. doi: 10.1371/journal.pcbi.1003010 (PMC3617026; doi:10.1371/journal.pcbi.1003010)
Supplement: Dataset S6 — Excel file Dataset_S6 contains the list of all 3104 solved BAC-unigene relationships. Column A: BAC address in [31] library. First four digits are plate number (0001–0816). Letter is row (A–P). Last two digits are column (01–24). Column B: POPA is SNP namein PilotOPA (1–3) format, as per [27]. Column C: BOPA_C is SNP name in concatenated barley production OPA format, as per [27]. Column D: POPA12_SNP is the original SNP name from the SNP information provider, as per [27]. Column E: POPA3_SNP is the original SNP name from the SNP information provider, as per [27]. Column F: U35 is HarvEST:Barley assembly 35 unigene number corresponding the SNP locus. Column G: MTP is the set of minimal tiling path clones (1–9). Column H: LG_2009 is the linkage group (chromosome) assignment reported on [27]. Column I: cM_2009 is the centiMorgan position reported in [27]. Column J: cM_2011 is the centiMorgan position reported in [27]. Column K: LG_Arm is the linkage group and arm reported in [28]. Column L: Sort indicates the chromosome and arm determined using flow sorted materials as per [28]. Column M: Luo indicates FPC contig of MingCheng Luo on http://phymap.ucdavis.edu/barley/. Column N: Bozdag indicates the compartmentalized FPC contig of Serdar Bozdag on http://phymap.ucdavis.edu/barley/. (XLSX) [file pcbi.1003010.s006.xlsx]

## Sheet: Master
BAC	POPA	BOPA_C	POPA12_SNP	POPA3_SNP	U35	MTP	LG_2009	cM_2009	cM_2011	LG_Arm	Sort	Luo	Bozdag
0391C07	1_0420	12_10420	3107-561		1656	MTP3			0.544441	1HS	1H	7828	3738
0717B03	1_0420	12_10420	3107-561		1656	MTP8			0.544441	1HS	1H	5594	19311
0262M19	1_0895	11_10895	7174-365		3803	MTP3	1H	0.774553	0.893129	1HS	1H	368	4005
0416L20	1_0895	11_10895	7174-365		3803	MTP3	1H	0.774553	0.893129	1HS	1H	368	4005
0705H13	1_1223	11_11223	ABC09402-1-2-275		17306	MTP3	1H	0.753429	1.24182	1HS	1H	10348	16741
0356N21	1_0460	11_10460	337-641		197	MTP3	1H	0.950588	3.20548	1HS	1H	10272	7447
0356N21	1_1311	12_11311	ABC13023-1-10-344		5087	MTP3	1H	0.950588	3.20548	1HS	1H	10272	7447
0391G05	3_0715	12_30715		U32_7636_1701	19074	MTP6	1H	1.50686	3.20548	1HS	1H	1599	19551
0561L17	3_0715	12_30715		U32_7636_1701	19074	MTP7	1H	1.50686	3.20548	1HS	1H	1599	19551
0722A09	1_0460	11_10460	337-641		197	MTP3	1H	0.950588	3.20548	1HS	1H	10272	7447
0722A09	1_1311	12_11311	ABC13023-1-10-344		5087	MTP3	1H	0.950588	3.20548	1HS	1H	10272	7447
0053K22	3_0820	12_30820		OSU_Aglu3_304	5442	MTP4	1H	59.711	4.71034	1HS	1H	3172	16763
0530P23	1_0419	11_10419	3101-111		15699	MTP3	1H	3.75306	4.71034	1HS	1H	1537	14591
0768H01	1_0419	11_10419	3101-111		15699	MTP3	1H	3.75306	4.71034	1HS	1H	1537	14591
0400A02	1_0636	12_10636	4314-1463		16297	MTP3	1H	4.50649	5.41383	1HS	1H	716	17265
0400A03	1_0636	12_10636	4314-1463		16297	MTP6	1H	4.50649	5.41383	1HS	1H	389	1995
0668P06	1_0636	12_10636	4314-1463		16297	MTP3	1H	4.50649	5.41383	1HS	1H	716	17265
0010C14	1_1011	12_11011	931-681		14172	MTP4	1H	6.02743	6.97986	1HS	1H	8922	6635
0010C14	3_0933	12_30933		SCRI_bbc00931_01_2	14172	MTP4	1H	6.02743	6.97986	1HS	1H	8922	6635
0307H06	1_1011	12_11011	931-681		14172	MTP5	1H	6.02743	6.97986	1HS	1H	1740	16430
0307H06	3_0933	12_30933		SCRI_bbc00931_01_2	14172	MTP5	1H	6.02743	6.97986	1HS	1H	1740	16430
0064B21	2_1174	11_21174	6949-895		18344	MTP1	1H	8.29476	8.95576	1HS	1H	8202	17420
0380C10	3_1149	12_31149		U35_16668_351	16668	MTP6	1H	10.6677	10.687	1HS	1H	10371	19480
0625J06	3_1149	12_31149		U35_16668_351	16668	MTP7	1H	10.6677	10.687	1HS	1H	10374	19480
0157B23	3_0950	12_30950		SCRI_bbc05112_01_1	17234	MTP4	1H	10.6677	11.3476	1HS	1H	1601	12776
0157B23	3_0951	12_30951		SCRI_bbc05112_01_2	17234	MTP4	1H	11.4211	11.3476	1HS	1H	1601	12776
0184F11	3_0919	12_30919		SCRI_abc15612_01_2	7605	MTP4	1H	10.6677	11.3476	1HS	1H	9187	11739
0184F11	3_0951	12_30951		SCRI_bbc05112_01_2	17234	MTP4	1H	11.4211	11.3476	1HS	1H	9187	11739
0184F11	3_0918	12_30918		SCRI_abc15612_01_1	7605	MTP4	1H	11.4211	11.3476	1HS	1H	9187	11739
0606J11	3_0919	12_30919		SCRI_abc15612_01_2	7605	MTP7	1H	10.6677	11.3476	1HS	1H	960	1434
0606J11	3_0918	12_30918		SCRI_abc15612_01_1	7605	MTP7	1H	11.4211	11.3476	1HS	1H	960	1434
0265H13	1_0332	11_10332	2609-350		14245	MTP3	1H	15.3995	11.6596	1HS	1H	4749	9445
0502D01	1_0332	11_10332	2609-350		14245	MTP3	1H	15.3995	11.6596	1HS	1H	4749	9445
0405G18	3_0588	12_30588		U32_5200_1052	2776	MTP6	1H	13.0547	12.9381	1HS	1H	2395	281
0503C15	3_0588	12_30588		U32_5200_1052	2776	MTP7	1H	13.0547	12.9381	1HS	1H	2395	281
0362P22	3_0955	12_30955		SCRI_bbc07107_01_431	2554	MTP6	1H	15.3009	14.5898	1HS		8011	13492
0140J01	1_0775	11_10775	5494-316		17344	MTP2	1H	17.2584	15.905	1HS	1H	9279	17946
0144D09	1_0775	11_10775	5494-316		17344	MTP4	1H	17.2584	15.905	1HS	1H	2306	10650
0416F21	1_0030	11_10030	10922-503		20838	MTP3	1H	18.0541	17.3977	1HS	1H	7503	18338
0416F21	2_0371	11_20371	2496-1916		1285	MTP3	1H	18.0541	17.3977	1HS	1H	7503	18338
0416F21	3_0876	12_30876		OSU_HvZFP16_1_711	30825	MTP3	1H	18.547	18.2174	1HS	1H	7503	18338
0139F21	1_0873	11_10873	6792-1945		17898	MTP4	1H	20.8918	20.3279	1HS	1H	6103	454
0283K17	3_0241	12_30241		ABC15164_2_387	15292	MTP5	1H	20.8214	20.3279	1HS	1H	1699	6239
0187N01	1_0757	11_10757	5318-436		17361	MTP3	1H	23.8633	22.0407	1HS	1H	5160	12473
0395C03	1_0757	11_10757	5318-436		17361	MTP3	1H	23.8633	22.0407	1HS	1H	5160	12473
0683P02	1_0186	11_10186	1906-429		860	MTP3	1H	23.8633	22.0407	1HS	1H	708	3372
0035L02	1_0744	11_10744	5194-1118		2603	MTP1	1H	26.1095	23.619	1HS	1H	3239	17894
0591B07	1_0744	11_10744	5194-1118		2603	MTP3	1H	26.1095	23.619	1HS	1H	3239	17894
0334L11	2_1048	11_21048	6081-850		17397	MTP3	1H	26.5812	24.035	1HS	1H	3003	13217
0740F02	2_1048	11_21048	6081-850		17397	MTP3	1H	26.5812	24.035	1HS	1H	3003	13217
0152B02	1_0760	11_10760	5346-1587		17207	MTP3	1H	34.8338	28.2008	1HS	1H	70	6172
0159G11	1_0760	11_10760	5346-1587		17207	MTP4	1H	34.8338	28.2008	1HS	1H	2216	15252
0004K05	1_0814	11_10814	596-1035		455	MTP4	1H	35.4464	28.99	1HS	1H	10166	14694
0064H10	1_0814	11_10814	596-1035		455	MTP1	1H	35.4464	28.99	1HS	1H	3951	3423
0552B19	1_0814	11_10814	596-1035		455	MTP3	1H	35.4464	28.99	1HS	1H	3951	3423
0554D17	1_1357	12_11357	ABC15151-1-1-403		7188	MTP3	1H	36.9532	30.1462	1HS	1H	831	16882
0073J18	3_1177	12_31177		U35_17276_547	17276	MTP4	1H	36.9532	30.8068	1HS	1H	8985	14331
0116F21	1_1498	12_11498	ConsensusGBS0455-1		1798	MTP2	1H	40.995	34.4466	1HS	1H	6545	10196
0362G12	1_0764	11_10764	5381-1950		2984	MTP3	1H	40.995	34.4466	1HS	1H	400	17753
0469I09	1_1498	12_11498	ConsensusGBS0455-1		1798	MTP3	1H	40.995	34.4466	1HS	1H	6545	10196
0810M24	3_0336	12_30336		U32_11789_202	7003	MTP9	1H	41.7625	35.1134	1HS	1H	4026	12869
0499D18	1_0275	11_10275	2314-1412		1266	MTP3	1H	42.5229	35.768	1HS	1H	3823	1819
0205L14	1_0597	11_10597	409-1643		16128	MTP3	1H	42.5229	36.6427	1HS	1H	5279	2684
0668G17	1_1266	12_11266	ABC10866-1-1-57		4898	MTP3	1H	42.5229	36.6427	1HS	1H	6310	6056
0034K03	1_0314	12_10314	2510-1464		15702	MTP4	1H	45.1283	38.3556	1HS	1H	6915	746
0368E07	1_0314	12_10314	2510-1464		15702	MTP6	1H	45.1283	38.3556	1HS	1H	8220	18782
0584N11	1_0314	12_10314	2510-1464		15702	MTP3	1H	45.1283	38.3556	1HS	1H	3459	10179
0047A14	3_0683	12_30683		U32_7097_198	17174	MTP4	1H	47.473	40.4049	1HS	1H	5234	15441
0068A17	1_0294	11_10294	2407-1771		15366	MTP1	1H	47.473	40.4049	1HS	1H	6149	16987
0113K20	1_0235	12_10235	2141-2425		15353	MTP2	1H	47.473	40.4049	1HS	1H	4377	12358
0430G10	3_0796	12_30796		U32_9600_655	17909	MTP6	1H	47.473	40.4049	1HS	1H	3186	14995
0648E04	1_0235	12_10235	2141-2425		15353	MTP8	1H	47.473	40.4049	1HS	1H	4377	12358
0745P01	1_0526	11_10526	3710-852		16244	MTP3	1H	47.473	40.4049	1HS	1H	4089	621
0124A21	2_0855	11_20855	5019-879		17177	MTP4	1H	49.339	41.7446	1HS	1H	96	4807
0161P13	1_0957	11_10957	8166-525		19180	MTP4	1H	49.339	41.7446	1HS	1H	96	4807
0300L19	1_1301	12_11301	ABC12550-1-3-276		5440	MTP3	1H	49.339	41.7446	1HS	1H	3597	4529
0472P18	1_1064	11_11064	ABC02639-1-4-370		574	MTP3	1H	49.339	41.7446	1HS	1H	10231	3712
0142A11	1_0159	12_10159	1749-948		15052	MTP4	1H	49.7	42.21	1HS	1H	7107	19126
0142E15	1_0159	12_10159	1749-948		15052	MTP2	1H	49.7	42.21	1HS	1H	5125	18609
0230D14	3_0436	12_30436		U32_2485_199	1312	MTP5	1H	49.7	42.21	1HS	1H	1415	1962
0367F04	3_0438	12_30438		U32_2509_1666	15529	MTP6	1H	49.7	42.21	1HS	1H	1234	14373
0408M15	3_0762	12_30762		U32_8648_439	4996	MTP6	1H	49.7	42.21	1HS	1H	1067	6717
0537E01	1_0159	12_10159	1749-948		15052	MTP3	1H	49.7	42.21	1HS	1H	2510	3552
0671I24	1_0470	11_10470	3444-1044		1826	MTP3	1H	49.7	42.21	1HS	1H	6048	2360
0718D02	3_0436	12_30436		U32_2485_199	1312	MTP8	1H	49.7	42.21	1HS	1H	1415	1962
0802L14	3_0762	12_30762		U32_8648_439	4996	MTP9	1H	49.7	42.21	1HS	1H	1067	6717
0040H01	1_0438	11_10438	3217-929		1191	MTP4	1H	50.0009	42.42	1HO	1H	4699	1508
0042N03	1_0438	11_10438	3217-929		1191	MTP1	1H	50.0009	42.42	1HO	1H	3523	9738
0383D01	1_0438	11_10438	3217-929		1191	MTP3	1H	50.0009	42.42	1HO	1H	3523	2658
0547M10	2_1188	11_21188	7037-454		3892	MTP3	1H	50.0009	42.42	1HO	1H	2126	4515
0759O12	2_1188	11_21188	7037-454		3892	MTP3	1H	50.0009	42.42	1HO	1H	2126	4515
0791F01	3_0562	12_30562		U32_4758_440	540	MTP9	1H	50.0009	42.42	1HO	1H	1272	2323
0065M05	1_1478	11_11478	ConsensusGBS0342-1		14431	MTP1	1H	50.0009	42.42	1HO		5028	10177
0407D06	1_1478	11_11478	ConsensusGBS0342-1		14431	MTP3	1H	50.0009	42.42	1HO		5028	10177
0216F18	3_1208	12_31208		U35_17973_708	17973	MTP5	1H	50.6	42.63	1HL	1H	7560	6937
0227E02	1_1336	11_11336	ABC14148-1-1-177		4935	MTP3	1H	50.6	42.63	1HL	1H	1209	5976
0329C16	2_0698	11_20698	4163-1786		16403	MTP3	1H	50.6	42.63	1HL	1H	5430	6950
0329C16	3_0043	12_30043		ABC05789_1_168	16403	MTP3	1H	50.6	42.63	1HL	1H	5430	6950
0367D14	1_0506	12_10506	3640-2807		2062	MTP3	1H	50.6	42.63	1HL	1H	795	19741
0496H11	1_0506	12_10506	3640-2807		2062	MTP3	1H	50.6	42.63	1HL	1H	2640	14419
0502A04	3_0404	12_30404		U32_1867_673	14487	MTP3	1H	50.6	42.63	1HL	1H	8632	18345
0502A04	2_0260	11_20260	1866-866		14486	MTP3	1H	50.6	42.63	1HL	1H	8632	18345
0511C04	1_0300	12_10300	243-767		157	MTP3	1H	50.6	42.63	1HL	1H	3260	6339
0661N08	1_1336	11_11336	ABC14148-1-1-177		4935	MTP3	1H	50.6	42.63	1HL	1H	1209	5976
0711G14	2_0260	11_20260	1866-866		14486	MTP3	1H	50.6	42.63	1HL	1H	9442	2798
0711G14	3_0404	12_30404		U32_1867_673	14487	MTP3	1H	50.6	42.63	1HL	1H	9442	2798
0712I20	2_0260	11_20260	1866-866		14486	MTP3	1H	50.6	42.63	1HL	1H	9442	2798
0712I20	3_0404	12_30404		U32_1867_673	14487	MTP3	1H	50.6	42.63	1HL	1H	9442	2798
0728B09	1_1036	12_11036	ABC00634-1-1-173		414	MTP3	1H	50.6	42.63	1HL	1H	2919	4530
0006B07	1_1287	11_11287	ABC11913-1-1-104		19092	MTP1	1H	50.0009	43.0843	1HL	1H	3874	6015
0464H02	1_1287	11_11287	ABC11913-1-1-104		19092	MTP3	1H	50.0009	43.0843	1HL	1H	3874	6015
0357G15	1_1484	11_11484	ConsensusGBS0371-2		16897	MTP3	1H	51.2261	44.1671	1HL	1H	6793	4595
0763H23	1_1484	11_11484	ConsensusGBS0371-2		16897	MTP3	1H	51.2261	44.1671	1HL	1H	6793	4595
0315I20	1_0833	11_10833	6313-107		17877	MTP3	1H	52.4583	44.5891	1HL	1H	5624	13442
0620P12	1_0938	12_10938	7833-315		4264	MTP7	1H	50.6	44.5891	1HL	1H	8712	19150
0753I13	3_1381	12_31381		U35_3371_1446	3371	MTP9	1H	50.6	44.5891	1HL	1H	5287	16256
0016F24	1_0520	11_10520	3689-1101		16483	MTP1	1H	55.4932	45.2009	1HL	1H	384	13193
0052N03	3_0462	12_30462		U32_2905_242	1443	MTP4	1H	50.6	45.2009	1HL	1H	752	15509
0158P01	1_1169	12_11169	ABC07427-1-1-329		2712	MTP3	1H	52.4583	45.2009	1HL	1H	9486	10588
0236L06	3_0592	12_30592		U32_5342_1253	17659	MTP5	1H	52.4583	45.2009	1HL	1H	2222	8293
0274H04	3_0110	12_30110		ABC08981_1_44	17958	MTP5	1H	55.4932	45.2009	1HL	1H	1556	3822
0292B05	3_0750	12_30750		U32_8403_383	4334	MTP5	1H	55.4932	45.2009	1HL	1H	6741	14279
0315I20	3_1272	12_31272		U35_19606_774	19606	MTP3	1H	52.4583	45.2009	1HL	1H	5624	13442
0392L18	3_0478	12_30478		U32_3183_518	1782	MTP6	1H	55.4932	45.2009	1HL	1H	9985	2634
0392L18	3_0499	12_30499		U32_3648_1062	1929	MTP6	1H	55.4932	45.2009	1HL	1H	9985	2634
0521B14	1_0933	11_10933	7800-594		18398	MTP3	1H	55.4932	45.2009	1HL	1H	9985	2634
0576C24	1_0520	11_10520	3689-1101		16483	MTP3	1H	55.4932	45.2009	1HL	1H	384	13193
0604L16	3_0110	12_30110		ABC08981_1_44	17958	MTP7	1H	55.4932	45.2009	1HL	1H	1556	3822
0743I22	1_1162	11_11162	ABC07133-1-1-56		3046	MTP3	1H	49.7	45.2009	1HL	1H	1922	4489
0375N13	2_1000	11_21000	5798-867		3175	MTP3	1H	52.4583	45.8493	1HL	1H	8074	17026
0646L16	2_1000	11_21000	5798-867		3175	MTP3	1H	52.4583	45.8493	1HL	1H	8074
0776E01	2_0912	11_20912	5297-796		3138	MTP3	1H	52.4583	46.5039	1HL	1H	4610	7228
0001L11	1_1107	12_11107	ABC05122-1-1-267		2014	MTP1	1H	53.2188	47.2135	1HL	1H	1944	4517
0349A11	1_1107	12_11107	ABC05122-1-1-267		2014	MTP3	1H	53.2188	47.2135	1HL	1H	1944	4517
0395P21	3_0786	12_30786		U32_9376_522	5596	MTP6	1H	54.7327	47.2135	1HL	1H	2080	3529
0523J11	3_0522	12_30522		U32_4007_238	2115	MTP7	1H	53.2188	47.2135	1HL	1H	5800	9303
0791E03	3_0786	12_30786		U32_9376_522	5596	MTP9	1H	54.7327	47.2135	1HL	1H	2080	3529
0035N22	2_1217	11_21217	7284-710		3566	MTP1	1H	54.7327	48.2901	1HL	1H	6662	17876
0320K09	2_1217	11_21217	7284-710		3566	MTP3	1H	54.7327	48.2901	1HL	1H	6662	17876
0732D02	1_1217	12_11217	ABC09281-2-3-421		4205	MTP3	1H	54.7327	48.2901	1HL	1H	2319	206
0182C24	1_0293	11_10293	2401-1028		15338	MTP3	1H	55.4932	48.9875	1HL	1H		13336
0489O21	1_0293	11_10293	2401-1028		15338	MTP3	1H	55.4932	48.9875	1HL	1H		13336
0490K13	1_0293	11_10293	2401-1028		15338	MTP3	1H	55.4932	48.9875	1HL	1H	9999	499
0553D22	2_1361	11_21361	8743-197		18165	MTP3	1H	55.4932	48.9875	1HL	1H	1184	2619
0803I03	2_1361	11_21361	8743-197		18165	MTP3	1H	55.4932	48.9875	1HL	1H	1184	2619
0816C14	1_1326	11_11326	ABC13652-1-2-156		20162	MTP3	1H	55.4932	48.9875	1HL	1H	1337	5985
0294D05	1_1256	11_11256	ABC10636-1-4-285		4520	MTP3	1H	55.4932	49.6482	1HL	1H	3891	295
0573L13	1_1256	11_11256	ABC10636-1-4-285		4520	MTP3	1H	55.4932	49.6482	1HL	1H	3891	295
0663I06	3_0710	12_30710		U32_7545_543	18291	MTP8	1H	56.2537	49.6482	1HL	1H	3880	6359
0196M12	1_0324	11_10324	2577-1122		15598	MTP3	1H	57.0071	50.5413	1HL	1H	10118	19655
0227G23	3_0348	12_30348		U32_12176_199	21403	MTP5	1H	55.4932	51.202	1HL	1H	5265	5483
0586N13	3_0348	12_30348		U32_12176_199	21403	MTP7	1H	55.4932	51.202	1HL	1H	5265	5483
0650H15	1_0198	12_10198	1955-868		14783	MTP3	1H	57.7676	51.202	1HL	1H	3965	4534
0723N20	3_0348	12_30348		U32_12176_199	21403	MTP8	1H	55.4932	51.202	1HL	1H	1615	19338
0216G06	3_0343	12_30343		U32_12084_521	6609	MTP5	1H	58.9012	51.9055	1HL	1H	513	1366
0467M06	1_0768	11_10768	5402-929		14672	MTP3	1H	59.711	52.6273	1HL	1H	1179	51
0631K12	1_0768	11_10768	5402-929		14672	MTP3	1H	59.711	52.6273	1HL	1H	1179	51
0015F18	1_0552	11_10552	3845-1089		2095	MTP1	1H	59.711	54.542	1HL	1H	426	12771
0053K22	3_0821	12_30821		OSU_Aglu3_536	5442	MTP4	1H	59.711	54.542	1HL	1H	3172	16763
0206D18	1_1444	12_11444	ConsensusGBS0131-2		16715	MTP3	1H	59.711	54.542	1HL	1H	3677	10135
0468E02	1_1444	12_11444	ConsensusGBS0131-2		16715	MTP3	1H	59.711	54.542	1HL	1H	3677	10135
0196O20	2_1463	12_21463	ABC02590-1-1-198		836	MTP3	1H	60.7742	57.2703	1HL	1H	5024	18555
0739M20	2_1463	12_21463	ABC02590-1-1-198		836	MTP3	1H	60.7742	57.2703	1HL	1H	5024	11843
0080B15	1_0201	12_10201	1968-1263		15132	MTP4	1H	60.7742	58.5856	1HL	1H	9287	9492
0815N08	1_0201	12_10201	1968-1263		15132	MTP3	1H	60.7742	58.5856	1HL	1H	10135	2831
0405J17	1_0617	11_10617	4178-1592		16844	MTP3	1H	61.5277	59.2891	1HL	1H	3882	13285
0519B12	1_0617	11_10617	4178-1592		16844	MTP3	1H	61.5277	59.2891	1HL	1H	3882	13225
0810K17	1_0302	11_10302	2459-237		1223	MTP3	1H	62.781	60.6471	1HL	1H	10093	13241
0142C09	2_1431	11_21431	9638-619		5005	MTP4	1H	64.9146	62.5985	1HL	1H	895	11519
0731K09	2_0642	11_20642	3914-448		16511	MTP3	1H	64.9146	62.5985	1HL	1H	10043	4992
0416J21	1_0516	11_10516	3675-2615		15515	MTP3	1H	65.5272	63.143	1HL	1H	706	17425
0501D13	1_0043	11_10043	11603-445		18187	MTP3	1H	65.9637	63.7425	1HL	1H	3669	4586
0214I24	1_0960	12_10960	8214-982		16887	MTP5	1H	66.7031	64.4398	1HL	1H	4326	1024
0227M01	1_1062	12_11062	ABC02507-1-2-432		766	MTP5	1H	66.7031	64.4398	1HL	1H	7166	8663
0364A18	1_1062	12_11062	ABC02507-1-2-432		766	MTP6	1H	66.7031	64.4398	1HL	1H	7166	8663
0496G06	1_0002	11_10002	10070-1435		17380	MTP3	1H	66.7031	64.4398	1HL	1H	8956	18349
0752E17	3_1464	12_31464		U35_5351_865	5351	MTP9	1H	66.7031	64.4398	1HL	1H	4788	12603
0194J13	2_0290	11_20290	2036-1027		719	MTP4	1H	69.5337	71.8112	1HL	1H	5728	5499
0345C07	1_0166	12_10166	1770-1477		599	MTP3	1H	69.5337	71.8112	1HL	1H	4716	2700
0342M17	3_0298	12_30298		AY972619_MX_Nec1_2066	1694	MTP6	1H	69.5337	73.1264	1HL	1H	2747	1266
0638K20	3_0505	12_30505		U32_3713_267	15770	MTP7	1H	70.2942	73.781	1HL	1H	3019	584
0096D18	2_1057	11_21057	6142-1544		3770	MTP4	1H	71.4278	74.8148	1HL	1H	2482	10641
0238C18	2_0229	11_20229	1670-369		763	MTP3	1H	71.4278	74.8148	1HL	1H	10242	2844
0335P06	2_0229	11_20229	1670-369		763	MTP3	1H	71.4278	74.8148	1HL	1H	10242	2844
0627M07	3_1160	12_31160		U35_17015_1178	17015	MTP7	1H	88.2286	74.8148	1HL	1H	7216	19171
0735J15	3_0742	12_30742		U32_825_2405	14219	MTP8	1H	71.4278	74.8148	1HL	1H	116	19479
0801M18	3_0742	12_30742		U32_825_2405	14219	MTP9	1H	71.4278	74.8148	1HL	1H	3337	2253
0512J21	1_1075	11_11075	ABC03430-1-1-265		15416	MTP3	1H	71.4278	75.4755	1HL	1H	6272	4594
0613H10	1_1075	11_11075	ABC03430-1-1-265		15416	MTP3	1H	71.4278	75.4755	1HL	1H	5676	4581
0722C12	2_1176	12_21176	6961-1324		18020	MTP3	1H	71.4278	75.4755	1HL	1H	3490	17822
0783G03	1_1075	11_11075	ABC03430-1-1-265		15416	MTP3	1H	71.4278	75.4755	1HL	1H	6272	4594
0067G11	1_0006	11_10006	1016-376		14336	MTP4	1H	73.9416	76.9192	1HL	1H	1856	5019
0390M01	1_0006	11_10006	1016-376		14336	MTP3	1H	73.9416	76.9192	1HL	1H	3298	2870
0814K22	1_0890	11_10890	713-972		13916	MTP3	1H	73.9416	76.9192	1HL	1H	4940	9289
0023P15	1_0279	11_10279	233-1327		13884	MTP1	1H	75.4485	77.5737	1HL	1H	4314	6845
0431A08	1_0279	11_10279	233-1327		13884	MTP3	1H	75.4485	77.5737	1HL	1H	4314	6845
0138F07	1_0686	11_10686	4665-882		15669	MTP2	1H	71.4278	77.9224	1HL	1H	651	1789
0789A20	1_0686	11_10686	4665-882		15669	MTP3	1H	71.4278	77.9224	1HL	1H	10390	1789
0404E18	2_1126	11_21126	6655-978		3916	MTP3	1H	73.9416	78.577	1HL	1H	9584	14343
0663H04	1_0466	11_10466	3406-221		1715	MTP3	1H	80.2648	84.7065	1HL	1H	2790	2866
0174G08	1_1037	11_11037	ABC00697-pHv3016		17561	MTP3	1H	84.6868	86.2481	1HL	1H	3941	1809
0184E03	1_1037	11_11037	ABC00697-pHv3016		17561	MTP3	1H	84.6868	86.2481	1HL	1H	3941	1809
0698F06	3_0072	12_30072		ABC07288_1_285	3288	MTP8	1H	83.2996	87.4349	1HL	1H	7740	3731
0681I01	1_0434	11_10434	3204-811		1707	MTP3	1H	86.1866	88.8847	1HL	1H	209	478
0086A13	3_0204	12_30204		ABC12677_2_128	5017	MTP1	1H	86.1866	89.7656	1HL	1H	1755	11614
0097A15	1_1144	12_11144	ABC06571-1-2-356		154	MTP1	1H	87.616	89.7656	1HL	1H	9976	19761
0518O01	1_0830	11_10830	6250-1056		3052	MTP3	1H	88.2286	89.7656	1HL	1H	10488	3837
0548O16	1_0471	11_10471	34-472		14765	MTP3	1H	88.2286	89.7656	1HL	1H	10036	2835
0779M15	3_0204	12_30204		ABC12677_2_128	5017	MTP9	1H	86.1866	89.7656	1HL	1H	1093	5885
0694N01	1_0535	12_10535	3752-175		2159	MTP8	1H	92.038	91.7292	1HL		1379	19702
0779J07	1_1189	11_11189	ABC08077-pHv131-02		17369	MTP3	1H	90.9747	92.4266	1HL	1H	1305	7443
0288O03	1_0433	11_10433	3201-603		15974	MTP3	1H	93.9462	95.1427	1HL	1H	5001	97
0647P06	3_1163	12_31163		U35_1704_1053	1704	MTP8	1H	93.9462	95.1427	1HL	1H	253	11507
0192I16	1_1008	12_11008	9279-368		19276	MTP4	1H	93.9462	96.9534	1HL	1H	3227	7475
0513K18	2_1373	11_21373	8867-459		19241	MTP3	1H	95.4249	96.9534	1HL	1H	9297	2629
0550G18	1_1008	12_11008	9279-368		19276	MTP3	1H	93.9462	96.9534	1HL	1H	2652	2629
0609F06	1_1008	12_11008	9279-368		19276	MTP3	1H	93.9462	96.9534	1HL	1H	2652	2629
0192I16	2_0149	11_20149	1347-1061		15058	MTP4			98.6846	1HL	1H	3227	7475
0269D20	3_1192	12_31192		U35_17735_1334	17735	MTP5	1H	96.9177	98.6846	1HL	1H	5572	8360
0550G18	2_0149	11_20149	1347-1061		15058	MTP3			98.6846	1HL	1H	2652	2629
0609F06	2_0149	11_20149	1347-1061		15058	MTP3			98.6846	1HL	1H	2652	2629
0358C20	1_1277	11_11277	ABC11290-sfp44-06		19734	MTP3	1H	97.6781	100.404	1HL	1H	10477	8510
0443H10	1_1277	11_11277	ABC11290-sfp44-06		19734	MTP3	1H	97.6781	100.404	1HL	1H	10477	8510
0446J02	3_1319	12_31319		U35_21782_494	21782	MTP7	1H	97.6781	100.404	1HL	1H	3894	11478
0112I17	2_0169	11_20169	14371-423		7262	MTP4	1H	99.9455	101.994	1HL	1H	2771	767
0067A05	1_0357	11_10357	2711-234		15710	MTP1	1H	100.692	103.994	1HL	1H	1069	2620
0226G20	1_1173	12_11173	ABC07506-1-2-502		17416	MTP3	1H	101.445	103.994	1HL	1H	9461	1910
0414E15	1_0357	11_10357	2711-234		15710	MTP3	1H	100.692	103.994	1HL	1H	1069	2620
0510N20	1_1173	12_11173	ABC07506-1-2-502		17416	MTP3	1H	101.445	103.994	1HL	1H	9461	1910
0293H09	1_0111	11_10111	1497-628		14803	MTP3	1H	101.445	105.775	1HL	1H	2217	2631
0293H09	2_0187	12_20187	1498-596		14805	MTP3	1H	101.445	105.775	1HL	1H	2217	2631
0326M14	2_1020	12_21020	5914-838		17507	MTP6	1H	101.445	105.775	1HL	1H	2465	2371
0383A07	3_0532	12_30532		U32_4190_2397	3573	MTP3	1H	109.825	105.775	1HL	1H	1235	13741
0524B15	3_1152	12_31152		U35_16827_1024	16827	MTP7	1H	101.445	105.775	1HL	1H	1798	4165
0558G05	1_0111	11_10111	1497-628		14803	MTP3	1H	101.445	105.775	1HL	1H	2217	2631
0558G05	2_0187	12_20187	1498-596		14805	MTP3	1H	101.445	105.775	1HL	1H	2217	2631
0601B22	3_1152	12_31152		U35_16827_1024	16827	MTP7	1H	101.445	105.775	1HL	1H	1798	5505
0601C22	3_1152	12_31152		U35_16827_1024	16827	MTP7	1H	101.445	105.775	1HL	1H	1798	4165
0643O19	3_0532	12_30532		U32_4190_2397	3573	MTP8	1H	109.825	105.775	1HL	1H	8840	14075
0654I08	3_0532	12_30532		U32_4190_2397	3573	MTP8	1H	109.825	105.775	1HL	1H	5972	18706
0673C24	2_1020	12_21020	5914-838		17507	MTP8	1H	101.445	105.775	1HL	1H	2465	2371
0362K14	3_0509	12_30509		U32_3796_993	16289	MTP3	1H	102.959	107.09	1HL	6HS	8468	2777
0324K14	3_0191	12_30191		ABC11972_1_79	5393	MTP6	1H	104.346	107.775	1HL	1H	1530	3546
0396D15	3_0191	12_30191		ABC11972_1_79	5393	MTP6	1H	104.346	107.775	1HL	1H	1530	3546
0560N03	3_0191	12_30191		ABC11972_1_79	5393	MTP7	1H	104.346	107.775	1HL	1H	1484	1598
0362K14	2_0921	11_20921	5336-400		2235	MTP3	1H	105.846	109.378	1HL	1H	8468	2777
0131J13	2_0220	11_20220	1625-303		45406	MTP4	1H	107.55	111.152	1HL	1H	5851	3894
0379K21	3_0014	12_30014		ABC02471_2_350	15343	MTP6	1H	113.303	114.718	1HL	1H	1786	3404
0733L19	3_0014	12_30014		ABC02471_2_350	15343	MTP8	1H	113.303	114.718	1HL	1H	1786	3404
0340J23	3_1526	12_31526		U35_8362_355	8362	MTP6	1H	112.909	115.091	1HL	1H	2728	7488
0401J16	3_1526	12_31526		U35_8362_355	8362	MTP3	1H	112.909	115.091	1HL	1H	2728	7840
0597O06	3_1526	12_31526		U35_8362_355	8362	MTP3	1H	112.909	115.091	1HL	1H	2728	2781
0775M24	1_0905	12_10905	7389-555		18486	MTP3	1H	114.838	116.162	1HL	1H	1672	16895
0096H03	1_0729	11_10729	5048-1685		16847	MTP4	1H	116.31	116.241	1HL	1H	781	10929
0367D12	1_1409	12_11409	ABC30545-sfp38-06		30571	MTP6	1H	115.915	117.245	1HL	1H	1241	515
0692K07	1_1409	12_11409	ABC30545-sfp38-06		30571	MTP3	1H	115.915	117.245	1HL	1H	710	5998
0773F12	1_1409	12_11409	ABC30545-sfp38-06		30571	MTP3	1H	115.915	117.245	1HL	1H	710	5998
0277P19	1_0338	11_10338	2633-498		1019	MTP3	1H	117.795	118.982	1HL	1H	10426	10028
0432A12	1_0338	11_10338	2633-498		1019	MTP3	1H	117.795	118.982	1HL	1H	10483	10028
0150D22	2_0959	11_20959	557-1297		13804	MTP4	1H	117.795	119.783	1HL	1H	636	3107
0451O08	3_0257	12_30257		ABC16431_1_600	6224	MTP7	1H	117.795	119.783	1HL	1H	10037	5189
0637N10	2_1172	12_21172	6937-609		4012	MTP7	1H	121.119	121.563	1HL	1H	3130	1442
0093I24	1_0911	11_10911	7527-1618		4245	MTP4	1H	120.506	121.802	1HL	1H	7566	18667
0095K07	1_0911	11_10911	7527-1618		4245	MTP4	1H	120.506	121.802	1HL	1H	6595	3956
0387E23	1_1528	11_11528	ConsensusGBS0687-3		8487	MTP3	1H	121.119	122.34	1HL	1H	2494	10345
0413J14	1_0586	11_10586	4027-1814		16527	MTP3	1H	121.774	123.105	1HL	1H	7461	17433
0751D06	1_0586	11_10586	4027-1814		16527	MTP3	1H	121.774	123.105	1HL	1H	7461	17433
0498L15	1_1457	12_11457	ConsensusGBS0237-2		15283	MTP3	1H	122.534	123.808	1HL	1H	2628	4501
0524I02	1_1443	12_11443	ConsensusGBS0103-1		3602	MTP3	1H	123.752	125.295	1HL	1H	6657	4603
0262E02	2_1140	11_21140	677-411		13742	MTP3	1H	126.013	127.265	1HL	1H	4247	2682
0359E04	2_1140	11_21140	677-411		13742	MTP3	1H	126.013	127.265	1HL	1H	2688	6778
0108E13	3_0403	12_30403		U32_185_829	214	MTP1	1H	126.484	128.042	1HL	1H	3440	9579
0309F07	3_1377	12_31377		U35_326_272	326	MTP3	1H	126.484	128.042	1HL	1H	1109	6297
0346M22	1_0207	12_10207	199-393		14719	MTP6	1H	126.484	128.042	1HL	1H	6813	12132
0588J09	3_0403	12_30403		U32_185_829	214	MTP3	1H	126.484	128.042	1HL	1H	3440	9901
0789L09	3_0403	12_30403		U32_185_829	214	MTP3	1H	126.484	128.042	1HL	1H	3440	9579
0789L09	3_1377	12_31377		U35_326_272	326	MTP3	1H	126.484	128.042	1HL	1H	3440	9579
0057E04	2_1068	11_21068	6201-1190		3618	MTP1	1H	126.484	128.042	1HL		5414	3432
0062E03	2_1068	11_21068	6201-1190		3618	MTP1	1H	126.484	128.042	1HL		7717	17933
0077K15	2_1068	11_21068	6201-1190		3618	MTP1	1H	126.484	128.042	1HL		9172	17958
0503P03	2_1068	11_21068	6201-1190		3618	MTP3	1H	126.484	128.042	1HL		9172	17958
0019H19	1_0644	11_10644	4393-1078		16630	MTP1	1H	127.097	128.629	1HL	1H	10342	19659
0604K24	1_0644	11_10644	4393-1078		16630	MTP3	1H	127.097	128.629	1HL	1H	10342	19659
0065M13	1_0693	12_10693	472-1376		280	MTP1	1H	128.139	130.415	1HL	1H	6202	1578
0085I21	1_0693	12_10693	472-1376		280	MTP1	1H	128.139	130.415	1HL	1H	6202	1578
0294G24	1_0693	12_10693	472-1376		280	MTP5	1H	128.139	130.415	1HL	1H	6202	1578
0335F07	2_0133	11_20133	1298-1450		462	MTP3	1H	128.139	132.165	1HL	1H	2228	5988
0493J16	1_1038	11_11038	ABC00875-1-3-436		18679	MTP3	1H	128.139	132.165	1HL	1H	2798	16967
0695E14	3_0649	12_30649		U32_6455_90	3458	MTP8	1H	128.139	132.165	1HL	1H	6450	15150
0604M17	1_0903	11_10903	7381-1292		4509	MTP3	1H	129.639	133.468	1HL	1H	8252	17037
0339I24	1_0782	11_10782	5555-438		3369	MTP3	1H	131.892	135.621	1HL	1H	3610	16929
0728I19	1_0782	11_10782	5555-438		3369	MTP3	1H	131.892	135.621	1HL	1H	3610	16929
0393F20	1_1271	12_11271	ABC11085-1-1-168		19448	MTP3	1H	132.526	136.704	1HL	1H	10109	5983
0667K24	1_1271	12_11271	ABC11085-1-1-168		19448	MTP3	1H	132.526	136.704	1HL	1H	10109	5983
0730F06	2_1105	12_21105	6473-811		17123	MTP8	1H	134.047	137.78	1HL	1H	2704	6768
0208P03	2_1384	11_21384	9022-543		4257	MTP3	1H	135.561	138.857	1HL	1H	3028	19825
0293J17	2_0599	12_20599	3653-519		16253	MTP5	1H	135.561	138.857	1HL	1H	398	711
0302N16	1_1509	11_11509	ConsensusGBS0554-4		2375	MTP3	1H	135.561	138.857	1HL	1H	3641	3603
0558J08	3_0277	12_30277		ABC20718_1_107	23125	MTP7	1H	135.561	138.857	1HL	1H	7183	3700
0658M14	1_1496	12_11496	ConsensusGBS0450-1		3786	MTP3	1H	135.561	138.857	1HL	1H	3470	12334
0306E02	2_0594	11_20594	3639-969		2103	MTP3	1H	136.314	139.603	1HL	1H	3649	15189
0075H13	1_0746	12_10746	5222-919		17154	MTP4	1H	138.307	141.463	1HL	1H	6989	19119
0232G06	1_0590	11_10590	4057-2114		15898	MTP3	1H	138.307	141.463	1HL	1H	2203	17787
0522F10	1_0590	11_10590	4057-2114		15898	MTP3	1H	138.307	141.463	1HL	1H	2203	17787
0203F01	3_0934	12_30934		SCRI_bbc01078_01_1	14389	MTP3	1H	140.525	143.2	1HL	1H	4774	7572
0213P22	2_0429	12_20429	2864-221		1459	MTP5	1H	140.525	143.2	1HL	1H	4805	12384
0465B06	1_0443	11_10443	3263-2865		16085	MTP3	1H	140.525	143.2	1HL	1H	1071	17266
0702G11	1_0443	11_10443	3263-2865		16085	MTP3	1H	140.525	143.2	1HL	1H	1071	17266
0246M19	1_0970	12_10970	842-1286		14707	MTP3	2H	0	0	2HS	2HS	10093	13241
0387D19	1_0970	12_10970	842-1286		14707	MTP3	2H	0	0	2HS	2HS	2412	5198
0677J01	3_1446	12_31446		U35_4853_243	4853	MTP8	2H	0	0.660671	2HS	2HS	2600	5217
0270H10	1_0718	12_10718	4953-858		2946	MTP3	2H	2.14056	3.09536	2HS	2HS	3363	5234
0612N23	1_0718	12_10718	4953-858		2946	MTP3	2H	2.14056	3.09536	2HS	2HS	3363	5234
0253O23	2_1415	12_21415	9452-210		19593	MTP5	2H	2.85629	3.84168	2HS	2HS	1101	1968
0253O04	3_1224	12_31224		U35_18360_1798	18360	MTP5	2H	4.07567	4.58799	2HS	2HS	7076	1683
0359J02	3_1224	12_31224		U35_18360_1798	18360	MTP6	2H	4.07567	4.58799	2HS	2HS	7076	1683
0388M03	3_1224	12_31224		U35_18360_1798	18360	MTP6	2H	4.07567	4.58799	2HS	2HS	7076	1617
0160M24	1_0326	11_10326	2582-767		1246	MTP3	2H	6.44818	4.72257	2HS	2HS	3662	1826
0209F01	1_0326	11_10326	2582-767		1246	MTP3	2H	6.44818	4.72257	2HS	2HS	3662	1826
0595I04	1_1030	12_11030	9837-659		4971	MTP3	2H	3.56539	6.08673	2HS	2HS	3535	7069
0636B07	1_1030	12_11030	9837-659		4971	MTP7	2H	3.56539	6.08673	2HS	2HS	2078	3608
0802K15	1_1030	12_11030	9837-659		4971	MTP3	2H	3.56539	6.08673	2HS	2HS	3535	7069
0278E23	1_1059	11_11059	ABC02329-1-20-250		14747	MTP3	2H	7.14403	7.91581	2HS	2HS	8210	6650
0510L21	1_0230	12_10230	2118-501		1027	MTP3	2H	7.14403	7.91581	2HS	2HS	1511	16905
0325A18	3_0781	12_30781		U32_9193_552	5737	MTP6	2H	8.56886	9.12092	2HS	2HS	2024	2019
0642C14	1_0592	12_10592	4063-677		16007	MTP3	2H	8.56886	9.12092	2HS	2HS	732	12076
0720M13	3_0781	12_30781		U32_9193_552	5737	MTP8	2H	8.56886	9.12092	2HS	2HS	7364	19327
0683E23	2_0563	11_20563	3453-1974		16078	MTP3	2H	9.27796	10.0691	2HS	2HS	10484
0038D07	1_0502	12_10502	3627-881		15997	MTP1	2H	10.06	10.8644	2HS	2HS	3258	16913
0038D07	1_1119	12_11119	ABC05684-pHv2534-05		2282	MTP1	2H	10.06	10.8644	2HS	2HS	3258	16913
0094K05	1_0502	12_10502	3627-881		15997	MTP1	2H	10.06	10.8644	2HS	2HS	4823	8337
0113P06	3_0155	12_30155		ABC10887_1_461	4480	MTP4	2H	10.06	10.8644	2HS	2HS	3857	3334
0158N12	3_0155	12_30155		ABC10887_1_461	4480	MTP4	2H	10.06	10.8644	2HS	2HS	5941	3921
0181G22	2_0562	11_20562	3452-1355		16004	MTP4	2H	10.9414	10.8644	2HS	2HS	1003	16770
0217J01	3_0402	12_30402		U32_1824_1338	15782	MTP5	2H	10.06	10.8644	2HS	2HS	5368	15118
0324L06	3_1497	12_31497		U35_6429_534	6429	MTP6	2H	10.06	10.8644	2HS	2HS	5989	15445
0391D22	3_0402	12_30402		U32_1824_1338	15782	MTP6	2H	10.06	10.8644	2HS	2HS	5368	15118
0395H15	3_0775	12_30775		U32_9035_229	4660	MTP6	2H	10.06	10.8644	2HS	2HS	2902	5240
0503M13	1_1119	12_11119	ABC05684-pHv2534-05		2282	MTP3	2H	10.06	10.8644	2HS	2HS	3258	16913
0742M14	3_0775	12_30775		U32_9035_229	4660	MTP8	2H	10.06	10.8644	2HS	2HS	2902	5240
0249M13	3_0631	12_30631		U32_6062_476	3020	MTP5	2H	15.1496	12.0695	2HS	2HS	9256	18959
0273L09	2_1416	11_21416	9490-843		5583	MTP3	2H	10.06	12.0695	2HS	2HS	2511	14578
0301F15	3_0631	12_30631		U32_6062_476	3020	MTP5	2H	15.1496	12.0695	2HS	2HS	9971	15849
0332D01	3_0631	12_30631		U32_6062_476	3020	MTP6	2H	15.1496	12.0695	2HS	2HS	9971	15849
0764F19	2_1416	11_21416	9490-843		5583	MTP3	2H	10.06	12.0695	2HS	2HS	2511	14578
0233C13	3_1284	12_31284		U35_20027_279	20027	MTP5	2H	19.4705	15.9846	2HS	2HS	3295	4885
0314G16	1_0943	11_10943	791-1113		13833	MTP3	2H	18.324	17.2386	2HS	2HS	2370	12104
0346E23	1_0180	11_10180	1865-396		14822	MTP3	2H	21.611	20.4502	2HS	2HS	2396	9007
0470C23	1_0180	11_10180	1865-396		14822	MTP3	2H	21.611	20.4502	2HS	2HS	2396	9007
0598A09	3_0871	12_30871		OSU_HvPRR7_2748	22237	MTP7	2H	26.5681	25.3318	2HS	2HS	10172	758
0598A09	3_0872	12_30872		OSU_HvPRR7_324	22237	MTP7	2H	26.5681	25.3318	2HS	2HS	10172	758
0104O14	2_0394	11_20394	2646-1277		15700	MTP4	2H	27.2905	26.6287	2HS	2HS	1886	10637
0434I23	1_0216	11_10216	2029-1143		922	MTP3	2H	26.5283	26.6287	2HS	2HS	394	17064
0797E11	2_0394	11_20394	2646-1277		15700	MTP3	2H	27.2905	26.6287	2HS	2HS	1993	2027
0450C16	2_1366	11_21366	8787-1459		19669	MTP3	2H	28.4436	27.4974	2HS	2HS	1332	16903
0657C17	2_0593	12_20593	3616-1171		16350	MTP8	2H	30.3058	29.045	2HS	2HS	2766	5258
0006J08	1_0307	11_10307	2477-377		1093	MTP1	2H	31.0215	30.4214	2HS	2HS	10276	2850
0236C10	2_0368	12_20368	2477-910		1093	MTP5	2H	31.0215	30.4214	2HS	2HS	5047	2489
0454I03	2_0368	12_20368	2477-910		1093	MTP3	2H	31.0215	30.4214	2HS	2HS	10276	2850
0294I09	2_1049	12_21049	6086-690		2718	MTP3	2H	32.3337	31.1677	2HS	2HS	3480	6338
0364P16	2_1049	12_21049	6086-690		2718	MTP3	2H	32.3337	31.1677	2HS	2HS	3480	6338
0079B20	1_0987	11_10987	864-594		14190	MTP4	2H	31.0215	31.9141	2HS	2HS	2852	1860
0294I09	1_0987	11_10987	864-594		14190	MTP3	2H	31.0215	31.9141	2HS	2HS	3480	6338
0364P16	1_0987	11_10987	864-594		14190	MTP3	2H	31.0215	31.9141	2HS	2HS	3480	6338
0563I22	1_1110	11_11110	ABC05236-1-10-217		1841	MTP3	2H	32.168	32.9785	2HS	2HS	9404	6119
0787L13	1_1110	11_11110	ABC05236-1-10-217		1841	MTP3	2H	32.168	32.9785	2HS	2HS	9404	6119
0239P19	1_1452	12_11452	ConsensusGBS0155-4		26	MTP3	2H	32.6253	33.8165	2HS	2HS	4265	19521
0329M13	1_1452	12_11452	ConsensusGBS0155-4		26	MTP3	2H	32.6253	33.8165	2HS	2HS	4265	19521
0239P19	2_1304	11_21304	816-265		403	MTP3	2H	33.7386	34.2386	2HS	2HS	4265	19521
0329M13	2_1304	11_21304	816-265		403	MTP3	2H	33.7386	34.2386	2HS	2HS	4265	19521
0352A04	1_0847	12_10847	6471-1139		17092	MTP6	2H	33.732	34.2386	2HS	2HS	7091	18847
0293C14	1_0525	11_10525	3709-716		16422	MTP3	2H	38.033	38.8633	2HS	7HS	2300	9383
0082C22	1_1073	11_11073	ABC03253-1-2-279		15481	MTP4	2H	38.477	39.3711	2HS		4994	8959
0084G16	1_1073	11_11073	ABC03253-1-2-279		15481	MTP1	2H	38.477	39.3711	2HS		407	2280
0574B01	1_1073	11_11073	ABC03253-1-2-279		15481	MTP3	2H	38.477	39.3711	2HS		407	2280
0192B13	1_1057	12_11057	ABC02113-1-11-456		14349	MTP4	2H	39.1	40.0317	2HS	2HS	1877	6783
0298O10	2_1461	12_21461	ABC02112-1-9-351		14351	MTP5			40.0317	2HS	2HS	1394	11332
0302E11	2_1461	12_21461	ABC02112-1-9-351		14351	MTP5			40.0317	2HS	2HS	4662	16780
0318F08	2_1461	12_21461	ABC02112-1-9-351		14351	MTP5			40.0317	2HS	2HS	3042	13935
0657H08	2_1461	12_21461	ABC02112-1-9-351		14351	MTP8			40.0317	2HS	2HS	4492	7563
0671N20	1_0399	11_10399	2964-382		15856	MTP3	2H	39.1	40.0317	2HS		5026	2672
0748K15	1_0178	11_10178	1862-765		13848	MTP3	2H	39.1	40.0317	2HS		6484	15641
0313P06	3_0420	12_30420		U32_2213_658	15357	MTP5	2H	39.1	40.6863	2HS	2HS	1711	12543
0554P19	3_0420	12_30420		U32_2213_658	15357	MTP7	2H	39.1	40.6863	2HS	2HS	407	5186
0663N21	3_0420	12_30420		U32_2213_658	15357	MTP8	2H	39.1	40.6863	2HS	2HS	23	12814
0793G20	3_0420	12_30420		U32_2213_658	15357	MTP9	2H	39.1	40.6863	2HS	2HS	1958	12861
0219N06	1_0919	11_10919	7623-818		3531	MTP3	2H	39.1	42.0076	2HS	2HS	4486	2914
0283O24	1_0919	11_10919	7623-818		3531	MTP3	2H	39.1	42.0076	2HS	2HS	4486	2914
0409L16	1_0296	12_10296	2416-1016		15625	MTP3	2H	39.1	42.0076	2HS	2HS	662	5169
0647D23	3_0657	12_30657		U32_6582_1350	4098	MTP8	2H	39.1	42.0076	2HS	2HS	9761	6794
0715C01	1_0837	11_10837	6338-682		16249	MTP3	2H	40.4983	42.0076	2HS	2HS	7612	4619
0734B23	3_0657	12_30657		U32_6582_1350	4098	MTP8	2H	39.1	42.0076	2HS	2HS	9761	6794
0778N08	1_0837	11_10837	6338-682		16249	MTP3	2H	40.4983	42.0076	2HS	2HS	7612	4619
0605A17	1_0648	11_10648	4410-284		16684	MTP3	2H	41.6647	42.7784	2HS	2HS	1527	9140
0371M21	1_0342	11_10342	2651-1774		14397	MTP3	2H	44.13	44.8216	2HS	2HS	75	2816
0249I19	3_0363	12_30363		U32_1342_283	14924	MTP5	2H	45.5548	46.1368	2HS	2HS	3134	11315
0482E02	3_0363	12_30363		U32_1342_283	14924	MTP3	2H	45.5548	46.1368	2HS	2HS	10174	17747
0573K11	3_0363	12_30363		U32_1342_283	14924	MTP3	2H	45.5548	46.1368	2HS	2HS	10174	17747
0003D21	1_1493	12_11493	ConsensusGBS0428-3		1603	MTP4	2H	45.5548	46.7424	2HS	2HS	631	589
0260D11	1_1493	12_11493	ConsensusGBS0428-3		1603	MTP5	2H	45.5548	46.7424	2HS	2HS	6356	11406
0277P19	3_0379	12_30379		U32_1472_575	591	MTP3	2H	46.2639	48.804	2HS	2HS	10426	10028
0432A12	3_0379	12_30379		U32_1472_575	591	MTP3	2H	46.2639	48.804	2HS	2HS	10483	10028
0240F01	1_0486	12_10486	3534-162		16334	MTP3	2H	46.9796	49.5014	2HS	2HS	1675	6250
0367D04	1_0486	12_10486	3534-162		16334	MTP6	2H	46.9796	49.5014	2HS	2HS	9199	18863
0526G14	1_0486	12_10486	3534-162		16334	MTP3	2H	46.9796	49.5014	2HS	2HS	1675	6250
0580B16	1_1340	12_11340	ABC14332-2-1-112		21406	MTP3	2H	47.6887	50.5352	2HS	2HS	2996	6377
0728H21	1_1340	12_11340	ABC14332-2-1-112		21406	MTP3	2H	47.6887	50.5352	2HS	2HS	2996	6086
0132M14	1_1061	11_11061	ABC02350-pHv759-04		621	MTP2	2H	49.0274	50.994	2HS	2HS	6214	4921
0055P24	1_1505	11_11505	ConsensusGBS0524-2		1361	MTP1	2H	49.0672	51.8749	2HS		9806	11414
0087P21	1_0498	11_10498	3598-489		1865	MTP4	2H	49.0672	53.0861	2HS	2HS	6370	5146
0089I19	1_0498	11_10498	3598-489		1865	MTP1	2H	49.0672	53.0861	2HS	2HS	4256	4657
0109D22	1_0498	11_10498	3598-489		1865	MTP1	2H	49.0672	53.0861	2HS	2HS	4256	4657
0700H04	1_0297	11_10297	2417-924		15512	MTP3	2H	51.7511	53.0861	2HS	2HS	10208	18230
0741E02	1_0498	11_10498	3598-489		1865	MTP3	2H	49.0672	53.0861	2HS	2HS	4256	4610
0026L05	1_1054	11_11054	ABC01899-1-1-301		2112	MTP1	2H	50.598	53.184	2HS	2HS	8543	6107
0008G19	2_0131	11_20131	1292-406		465	MTP1			54.2667	2HS		3842	590
0080D03	1_0156	12_10156	1742-718		15099	MTP1	2H	51.7511	54.2667	2HS		10208	18230
0288G10	1_0234	11_10234	2128-874		15458	MTP3	2H	51.7511	54.2667	2HS		9876	2851
0527D10	1_0234	11_10234	2128-874		15458	MTP3	2H	51.7511	54.2667	2HS		9876	2851
0696P20	2_0131	11_20131	1292-406		465	MTP3			54.2667	2HS		3842	590
0723M11	1_0156	12_10156	1742-718		15099	MTP8	2H	51.7511	54.2667	2HS		757	1405
0101O19	2_0688	12_20688	4131-605		16176	MTP4	2H	51.7511	55.4596	2HS	2HS	9333	19343
0243L05	3_0691	12_30691		U32_7203_1124	18073	MTP5	2H	51.7511	55.4596	2HS	2HS	7909	16290
0288G10	3_0604	12_30604		U32_5549_215	2414	MTP3	2H	51.7511	55.4596	2HS	2HS	9876	2851
0340N04	3_0691	12_30691		U32_7203_1124	18073	MTP6	2H	51.7511	55.4596	2HS	2HS	5651	5267
0433H13	3_0691	12_30691		U32_7203_1124	18073	MTP6	2H	51.7511	55.4596	2HS	2HS	7909	16290
0527D10	3_0604	12_30604		U32_5549_215	2414	MTP3	2H	51.7511	55.4596	2HS	2HS	9876	2851
0618B10	2_0688	12_20688	4131-605		16176	MTP7	2H	51.7511	55.4596	2HS	2HS	3666	59
0043N21	1_0733	11_10733	5113-624		17355	MTP1	2H	54.952	56.6403	2HS	2HS	4983	18617
0156D07	2_1096	11_21096	6384-866		17641	MTP4	2H	54.952	56.6403	2HS	2HS	6419	9809
0556L12	3_0259	12_30259		ABC16937_1_362	8930	MTP7	2H	54.952	56.6403	2HS	2HS	9902	19718
0558J19	1_0733	11_10733	5113-624		17355	MTP3	2H	54.952	56.6403	2HS	2HS	4983	13245
0401E10	1_0325	11_10325	2580-1456		15607	MTP3	2H	54.952	56.6403	2HS		1817	4492
0805O21	1_0325	11_10325	2580-1456		15607	MTP3	2H	54.952	56.6403	2HS		1817	4492
0502A01	2_1388	11_21388	9060-471		4170	MTP3	2H	54.952	57.2948	2HS	2HS	9977	1799
0559G03	1_1131	12_11131	ABC05977-1-10-470		2310	MTP3	2H	52.4669	57.2948	2HS	2HS	1103	5213
0717P08	1_0638	11_10638	4331-1475		2082	MTP3	2H	52.4669	57.2948	2HS	2HS	6509	17374
0502A01	3_1474	12_31474		U35_5503_883	5503	MTP3	2H	53.5272	58.4999	2HS	2HS	9977	1799
0502A01	1_1400	11_11400	ABC20402-1-3-298		23488	MTP3	2H	53.5272	58.4999	2HS		9977	1799
0131C21	2_0387	11_20387	2601-171		15723	MTP4	2H	54.952	59.5766	2HS	2HS	2711	2193
0432D09	3_0338	12_30338		U32_11868_607	6454	MTP6	2H	54.952	60.8918	2HS	2HS	7435	15914
0028C23	2_0748	11_20748	4467-374		16863	MTP1	2H	56.2841	61.4913	2HS	2HS		13342
0344F23	1_0927	12_10927	7735-657		4578	MTP3	2H	54.952	61.4913	2HS	2HS	2504	8578
0472F05	2_0891	11_20891	5184-1163		3000	MTP3	2H	56.2841	61.4913	2HS	2HS	4001	17875
0657F10	2_0235	12_20235	1709-388		15122	MTP8	2H	54.952	61.4913	2HS	2HS	7352	14950
0722B19	2_0748	11_20748	4467-374		16863	MTP3	2H	56.2841	61.4913	2HS	2HS		13342
0735J05	2_0891	11_20891	5184-1163		3000	MTP3	2H	56.2841	61.4913	2HS	2HS	4001	17875
0027J13	3_0209	12_30209		ABC12967_1_550	5157	MTP4	2H	56.9932	62.1887	2HS	2HS	182	9408
0042H07	1_0558	12_10558	3884-1569		16637	MTP1	2H	56.9932	62.8493	2HS	2HS	4577	13174
0176I10	3_0557	12_30557		U32_4648_330	16849	MTP4	2H	56.9932	62.8493	2HS	2HS	3227	5035
0675C20	3_0557	12_30557		U32_4648_330	16849	MTP8	2H	56.9932	62.8493	2HS	2HS	3754	13172
0061C15	1_1133	11_11133	ABC06091-1-1-187		893	MTP1	2H	58.2391	63.5528	2HS	2HS	381	4467
0096E23	2_0500	11_20500	3212-2979		1365	MTP4	2H	58.2391	63.5528	2HS	2HS	5643	15110
0409E02	1_1133	11_11133	ABC06091-1-1-187		893	MTP3	2H	58.2391	63.5528	2HS	2HS	381	4467
0413O07	1_0948	12_10948	796-1148		13825	MTP3	2H	58.9	63.5528	2HS	2HS	4387	6390
0415P06	3_1288	12_31288		U35_20266_369	20266	MTP6	2H	58.2391	63.5528	2HS	2HS	3584	14181
0427I03	1_0602	11_10602	411-495		396	MTP3	2H	58.2391	63.5528	2HS	2HS	10373	17293
0480G08	3_1288	12_31288		U35_20266_369	20266	MTP7	2H	58.2391	63.5528	2HS	2HS	3584	14181
0495C12	1_1133	11_11133	ABC06091-1-1-187		893	MTP3	2H	58.2391	63.5528	2HS	2HS	381	4631
0733C16	1_0330	12_10330	2593-354		1303	MTP3	2H	58.2391	63.5528	2HS	2HS	4968	17341
0782K06	1_0796	11_10796	5759-478		15950	MTP3	2H	58.2391	63.5528	2HS	2HS	1530	3546
0653F10	3_0634	12_30634		U32_6180_831	3286	MTP8	2H	58.2391	65.5287	2HS	2HS	2402	2354
0773K17	3_0634	12_30634		U32_6180_831	3286	MTP9	2H	58.2391	65.5287	2HS	2HS	2402	2354
0215G19	1_1046	11_11046	ABC01644-1-3-379		14907	MTP3	2H	58.9	66.1955	2HS	2HS	2742	5996
0232P12	3_0772	12_30772		U32_8961_658	4920	MTP5	2H	58.9	66.1955	2HS	2HS	5471	17530
0242H17	1_1155	12_11155	ABC06958-1-4-146		16303	MTP3	2H	58.9	66.1955	2HS	2HS	1059	6795
0327E13	2_0181	12_20181	1479-1119		374	MTP6	2H	58.9	66.1955	2HS	2HS	315	6190
0392O15	1_1155	12_11155	ABC06958-1-4-146		16303	MTP3	2H	58.9	66.1955	2HS	2HS	5351	6866
0614C10	1_0679	11_10679	4630-1036		16560	MTP3	2H	58.9	66.1955	2HS	2HS	7860	17016
0729K03	1_0679	11_10679	4630-1036		16560	MTP3	2H	58.9	66.1955	2HS	2HS	7860	17016
0736K02	1_1155	12_11155	ABC06958-1-4-146		16303	MTP3	2H	58.9	66.1955	2HS	2HS	4206	19768
0050K16	1_0947	11_10947	7959-829		4807	MTP1	2H	58.9	67.0825	2HS	2HS	3785	2908
0069H15	1_0099	12_10099	1432-561		15103	MTP1	2H	58.9	67.0825	2HS	2HS	10086	18258
0100J20	2_0476	11_20476	3090-138		15980	MTP4	2H	58.9	67.0825	2HS	2HS	4906	4055
0258D01	1_0099	12_10099	1432-561		15103	MTP3	2H	58.9	67.0825	2HS	2HS	10086	18258
0348G02	3_0179	12_30179		ABC11718_2_269	5180	MTP6	2H	58.9	67.0825	2HS	2HS	7238	12646
0685G01	3_0042	12_30042		ABC05679_1_681	16729	MTP8	2H	58.9	67.0825	2HS	2HS	1154	5228
0697M23	2_0160	11_20160	13926-531		23260	MTP3	2H	58.9	67.0825	2HS	2HS	4067	16944
0726G23	3_0179	12_30179		ABC11718_2_269	5180	MTP8	2H	58.9	67.0825	2HS	2HS	7238	12692
0139B02	1_0624	11_10624	4233-63		848	MTP2	2H	59.21	67.6331	2HO		1275
0330D04	1_0624	11_10624	4233-63		848	MTP3	2H	59.21	67.6331	2HO		1275	4482
0018G21	2_0862	11_20862	5046-619		16933	MTP4			68.0674	2HL	2HL		18859
0084H11	1_1211	11_11211	ABC09016-2-2-348		4085	MTP1	2H	59.9	68.0674	2HL	2HL	8487	1888
0100N21	1_0057	11_10057	1214-441		14590	MTP4			68.0674	2HL	2HL	377	3997
0318I23	3_0206	12_30206		ABC12732_2_890	4907	MTP5	2H	59.21	68.0674	2HL	2HL	256	13707
0318J08	1_1288	12_11288	ABC11935-sfp60		5841	MTP3	2H	59.9	68.0674	2HL	2HL	7281	6080
0373B24	3_0514	12_30514		U32_3895_787	2098	MTP6	2H	59.9	68.0674	2HL	2HL	9	3131
0470I13	1_1211	11_11211	ABC09016-2-2-348		4085	MTP3	2H	59.9	68.0674	2HL	2HL	8487	1888
0491P01	3_1218	12_31218		U35_18188_1004	18188	MTP7	2H	59.9	68.0674	2HL	2HL	8389	10568
0550K03	3_0206	12_30206		ABC12732_2_890	4907	MTP7	2H	59.21	68.0674	2HL	2HL	597	6201
0793D08	2_0196	12_20196	1522-412		14568	MTP3	2H	59.9	68.0674	2HL	2HL	6175	9321
0793E09	2_0196	12_20196	1522-412		14568	MTP9	2H	59.9	68.0674	2HL	2HL	1797	16510
0794F16	3_0561	12_30561		U32_4731_1631	2752	MTP9	2H	59.9	68.0674	2HL	2HL	1735	3226
0083E14	2_0251	11_20251	1826-229		15783	MTP4	2H	59.9	68.5568	2HL	2HL	1187	15610
0062L21	1_1369	12_11369	ABC16534-1-1-101		20199	MTP4	2H	59.21	69.0462	2HL	2HL	1525	7355
0135D11	1_0883	12_10883	697-715		14504	MTP4	2H	59.21	69.0462	2HL	2HL	1402	6221
0318G05	1_1369	12_11369	ABC16534-1-1-101		20199	MTP3	2H	59.21	69.0462	2HL	2HL	7764	19875
0358E01	1_0035	12_10035	1114-892		14751	MTP3	2H	62.8184	69.0462	2HL	2HL	10128	10143
0487P17	1_0035	12_10035	1114-892		14751	MTP3	2H	62.8184	69.0462	2HL	2HL	9881	10143
0503L07	1_1369	12_11369	ABC16534-1-1-101		20199	MTP3	2H	59.21	69.0462	2HL	2HL	7764
0632J01	1_1369	12_11369	ABC16534-1-1-101		20199	MTP7	2H	59.21	69.0462	2HL	2HL	10133	19771
0638L08	1_0154	12_10154	1737-1233		15070	MTP7	2H	59.21	69.0462	2HL	2HL	779	7305
0724E05	1_1384	11_11384	ABC17685-1-4-365		4596	MTP3	2H	60.6845	69.7925	2HL	2HL	3984	6021
0112G15	2_0335	12_20335	2292-1253		15474	MTP4	2H	61.3936	70.5388	2HL	2HL	6042	7677
0527B17	2_0335	12_20335	2292-1253		15474	MTP7	2H	61.3936	70.5388	2HL	2HL	6043	3244
0194C13	2_0585	11_20585	3576-2715		15604	MTP3	2H	63.5341	72.0314	2HL	2HL	21	3083
0522J06	2_0585	11_20585	3576-2715		15604	MTP3	2H	63.5341	72.0314	2HL	2HL	21	3083
0692F19	1_0640	12_10640	4337-601		16610	MTP3	2H	62.8184	72.0314	2HL	2HL	3154	18462
0193D15	1_0191	11_10191	1917-848		837	MTP3	2H	63.5341	72.9919	2HL	2HL	4993	3277
0226I20	3_0323	12_30323		U32_10869_506	6625	MTP5	2H	63.5341	72.9919	2HL	2HL	7389	11055
0241D04	3_0275	12_30275		ABC19861_2_376	8314	MTP5	2H	63.5341	72.9919	2HL	2HL	4933	10715
0286O13	1_1504	12_11504	ConsensusGBS0519-1		16957	MTP5	2H	63.5341	72.9919	2HL	2HL	291	18
0312F14	1_1324	12_11324	ABC13578-1-2-135		6179	MTP3	2H	63.5341	72.9919	2HL	2HL	3536	6334
0316G02	3_0108	12_30108		ABC08847_1_341	17829	MTP5	2H	63.5341	72.9919	2HL	2HL	9931	6956
0331K14	1_1324	12_11324	ABC13578-1-2-135		6179	MTP3	2H	63.5341	72.9919	2HL	2HL	3536	6334
0339H14	3_0724	12_30724		U32_7924_529	18514	MTP6	2H	63.5341	72.9919	2HL	2HL	3359	1445
0599N21	3_0323	12_30323		U32_10869_506	6625	MTP7	2H	63.5341	72.9919	2HL	2HL	7210	1116
0128E05	1_0632	11_10632	4280-295		2583	MTP2	2H	63.5341	73.3467	2HL	2HL	3167	17296
0378E23	1_0632	11_10632	4280-295		2583	MTP3	2H	63.5341	73.3467	2HL	2HL	3167	17296
0756F17	1_0692	11_10692	4717-386		3425	MTP3	2H	63.5341	73.3467	2HL	2HL	3550	3169
0095P22	1_1278	12_11278	ABC11345-1-2-363		19760	MTP4	2H	63.5341	73.8911	2HL	2HL	7779	18758
0099J06	1_1278	12_11278	ABC11345-1-2-363		19760	MTP4	2H	63.5341	73.8911	2HL	2HL	5862	9269
0199K15	1_1278	12_11278	ABC11345-1-2-363		19760	MTP3	2H	63.5341	73.8911	2HL	2HL	3555	19526
0402C21	1_1316	12_11316	ABC13156-sfp87-02		20298	MTP6	2H	64.2432	73.8911	2HL	2HL	2384	2506
0514L08	1_1278	12_11278	ABC11345-1-2-363		19760	MTP3	2H	63.5341	73.8911	2HL	2HL	3555	19526
0741F17	1_1316	12_11316	ABC13156-sfp87-02		20298	MTP8	2H	64.2432	73.8911	2HL	2HL	2384	2512
0594D07	1_1430	11_11430	ConsensusGBS0008-1		15361	MTP3	2H	64.2432	73.8911	2HL		2973	4512
0070I10	3_1252	12_31252		U35_19042_573	19042	MTP1	2H	64.2432	74.5518	2HL	4HS	10067	19793
0717N08	3_1252	12_31252		U35_19042_573	19042	MTP3	2H	64.2432	74.5518	2HL	4HS	10067	19532
0010B13	2_1166	11_21166	6911-866		18021	MTP1	2H	66.8278	75.9526	2HL	2HL	7142	17954
0466L04	1_1121	12_11121	ABC05800-1-1-142		2107	MTP3	2H	67.5435	76.6133	2HL	2HL	245	5871
0512C14	1_1121	12_11121	ABC05800-1-1-142		2107	MTP3	2H	67.5435	76.6133	2HL	2HL	245	5871
0708O13	1_1347	12_11347	ABC14534-1-4-467		21103	MTP3	2H	66.1187	76.6133	2HL	2HL	6928	6087
0756I19	1_1347	12_11347	ABC14534-1-4-467		21103	MTP9	2H	66.1187	76.6133	2HL	2HL	6928	19413
0736N19	1_1072	11_11072	ABC03181-1-1-164		254	MTP3	2H	66.1187	77.7573	2HL	2HL	9854	3096
0117H18	2_0690	11_20690	4136-869		16459	MTP2	2H	62.8184	78.5403	2HL	2HL	1471	4625
0185C17	2_1144	11_21144	6804-1197		18158	MTP4	2H	69.2533	78.5403	2HL	2HL	7268	342
0006K04	1_0651	11_10651	4434-804		2472	MTP1	2H	68.2394	79.8188	2HL	2HO	5794	17377
0380C18	1_0651	11_10651	4434-804		2472	MTP3	2H	68.2394	79.8188	2HL	2HO	5794	17377
0463N09	1_1096	12_11096	ABC04704-3-1-245		1644	MTP3	2H	69.1606	79.9167	2HL	2HL	2745	1998
0464P10	1_1096	12_11096	ABC04704-3-1-245		1644	MTP3	2H	69.1606	79.9167	2HL	2HL	2745	1998
0047G01	2_0833	11_20833	4868-166		2808	MTP4	2H	71.1156	82.4431	2HL	2HL	2586	1115
0096H19	2_0833	11_20833	4868-166		2808	MTP4	2H	71.1156	82.4431	2HL	2HL	1891	3386
0125B08	1_0719	12_10719	4956-1444		16451	MTP2	2H	71.1156	82.4431	2HL	2HL	307	3225
0314P16	1_0407	11_10407	3014-914		15621	MTP3	2H	71.1156	82.4431	2HL	2HL	10183	19839
0314P16	3_1020	12_31020		SCRI_olad_220	15621	MTP3	2H	71.1156	82.4431	2HL	2HL	10183	19839
0314P16	3_1020	12_31020		SCRI_olad_220	15621	MTP5	2H	71.1156	82.4431	2HL	2HL	10183	19839
0384I02	1_0719	12_10719	4956-1444		16451	MTP3	2H	71.1156	82.4431	2HL	2HL	307	3225
0522C20	3_0205	12_30205		ABC12706_1_246	5836	MTP3	2H	71.1156	82.4431	2HL	2HL	3355	69
0802B19	3_1020	12_31020		SCRI_olad_220	15621	MTP9	2H	71.1156	82.4431	2HL	2HL	2570	12034
0598F24	1_0717	12_10717	4944-2118		2326	MTP7	2H	71.5596	82.9814	2HL	2HL	2683	3166
0740A22	2_0528	11_20528	334-1164		13829	MTP3	2H	73.0374	84.3517	2HL	2HL	4853	3206
0239A20	1_1402	11_11402	ABC22343-1-1-120		9836	MTP3	2H	73.7465	84.9573	2HL	2HL	10133	1838
0796P09	1_0650	12_10650	441-961		15003	MTP9	2H	73.7465	84.9573	2HL	2HL	778	5166
0681F08	2_0419	11_20419	2809-271		1435	MTP3	2H	74.3695	85.5201	2HL	2HL	6675	6483
0591N02	1_1449	12_11449	ConsensusGBS0143-1		21218	MTP7	2H	75.178	86.5845	2HL	2HL	1552	19760
0608C21	1_0952	11_10952	8065-1203		19220	MTP3	2H	75.178	86.5845	2HL	2HL	1421	11802
0241L02	3_0178	12_30178		ABC11711_1_344	5380	MTP5	2H	75.8937	87.2452	2HL	2HL	835	3129
0051F03	1_0196	11_10196	1946-698		15072	MTP4	2H	78.0343	89.6799	2HL	2HL	1610	7376
0051F17	1_0196	11_10196	1946-698		15072	MTP1	2H	78.0343	89.6799	2HL	2HL	4750	3205
0342O03	1_1388	12_11388	ABC18508-1-4-343		21925	MTP3	2H	78.0343	89.6799	2HL	2HL	1440	19774
0362M12	3_0696	12_30696		U32_7285_433	3479	MTP3	2H	78.0343	89.6799	2HL	2HL	1023	3116
0410A13	1_1388	12_11388	ABC18508-1-4-343		21925	MTP6	2H	78.0343	89.6799	2HL	2HL	1440	19774
0437K09	1_1435	11_11435	ConsensusGBS0033-1		3742	MTP3	2H	78.0343	89.6799	2HL	2HL	10410	8762
0437K09	3_1398	12_31398		U35_3742_3272	3742	MTP3	2H	78.0343	89.6799	2HL	2HL	10410	8762
0074K12	1_0818	11_10818	6023-567		18474	MTP1	2H	78.0343	90.4752	2HL	2HL	5847	13269
0409H17	1_0818	11_10818	6023-567		18474	MTP3	2H	78.0343	90.4752	2HL	2HL	5847	13269
0465H17	3_1445	12_31445		U35_4851_493	4851	MTP3	2H	79.1874	90.4752	2HL	2HL	475	16876
0605B18	2_0489	12_20489	316-1429		14236	MTP3	2H	79.1874	90.4752	2HL	2HL	5854	6463
0323A12	2_0699	11_20699	4164-176		1852	MTP3	2H	78.0343	91.1114	2HL	2HL	2809	3185
0012D22	3_1293	12_31293		U35_20358_497	20358	MTP4	2H	81.3279	93.2647	2HL	2HL	9670	17699
0217D11	1_0859	12_10859	6600-453		17102	MTP5	2H	81.3279	93.2647	2HL	2HL	1651	6753
0319B23	3_1293	12_31293		U35_20358_497	20358	MTP5	2H	81.3279	93.2647	2HL	2HL	9645	18817
0073O07	1_0823	11_10823	6117-1507		1467	MTP4	2H	82.7528	95.5831	2HL	2HL	2308	18615
0264O02	1_1214	11_11214	ABC09163-1-3-313		18066	MTP3	2H	82.7528	95.5831	2HL	2HL	4730	4427
0526J03	1_0823	11_10823	6117-1507		1467	MTP3	2H	82.7528	95.5831	2HL	2HL	10051	19804
0771C11	1_0823	11_10823	6117-1507		1467	MTP3	2H	82.7528	95.5831	2HL	2HL	10051	19804
0169H02	2_0781	11_20781	4629-162		16046	MTP3	2H	83.8197	96.2316	2HL	2HL	1461	17920
0358A10	2_0781	11_20781	4629-162		16046	MTP3	2H	83.8197	96.2316	2HL	2HL	1461	3150
0472A20	1_1100	11_11100	ABC04861-2-1-334		1276	MTP3	2H	83.8197	96.2316	2HL	2HL	1461	3150
0552B09	1_1100	11_11100	ABC04861-2-1-334		1276	MTP3	2H	83.8197	96.2316	2HL	2HL	1461	3150
0091I03	1_0287	11_10287	2371-950		1284	MTP4	2H	85.9205	98.7397	2HL	2HL	1688	10276
0422L15	1_0287	11_10287	2371-950		1284	MTP3	2H	85.9205	98.7397	2HL	2HL	2238	1804
0454A07	1_0287	11_10287	2371-950		1284	MTP3	2H	85.9205	98.7397	2HL	2HL	2238	1804
0454A07	2_0340	11_20340	2322-462		15564	MTP3	2H	85.9205	98.7397	2HL	2HL	2238	1804
0047L23	3_0896	12_30896		OSU_VRS1_HvHox1_1156	47126	MTP4	2H	86.6296	99.3942	2HL	2HL	513	1366
0047L23	3_0897	12_30897		OSU_VRS1_HvHox1_260	47126	MTP4	2H	86.6296	99.3942	2HL	2HL	513	1366
0047L23	3_0899	12_30899		OSU_VRS1_HvHox1_49	47126	MTP4	2H	86.6296	99.3942	2HL	2HL	513	1366
0047L23	3_0900	12_30900		OSU_VRS1_HvHox1_587	47126	MTP4	2H	86.6296	99.3942	2HL	2HL	513	1366
0047L23	3_0901	12_30901		OSU_VRS1_HvHox1_802	47126	MTP4	2H	86.6296	99.3942	2HL	2HL	513	1366
0351N10	3_0897	12_30897		OSU_VRS1_HvHox1_260	47126	MTP6	2H	86.6296	99.3942	2HL	2HL	7063	7214
0351N10	3_0901	12_30901		OSU_VRS1_HvHox1_802	47126	MTP6	2H	86.6296	99.3942	2HL	2HL	7063	7214
0351N10	3_0900	12_30900		OSU_VRS1_HvHox1_587	47126	MTP6	2H	86.6296	99.3942	2HL	2HL	7063	7214
0351N10	3_0896	12_30896		OSU_VRS1_HvHox1_1156	47126	MTP6	2H	86.6296	99.3942	2HL	2HL	7063	7214
0351N10	3_0899	12_30899		OSU_VRS1_HvHox1_49	47126	MTP6	2H	86.6296	99.3942	2HL	2HL	7063	7214
0479D08	3_1205	12_31205		U35_17930_958	17930	MTP7	2H	86.6296	99.3942	2HL	2HL	5229	15635
0462N21	1_1533	11_11533	ConsensusGBS0705-1		13232	MTP3	2H	87.3255	100.049	2HL	2HL	5403	11633
0086B23	1_0475	11_10475	3469-1152		1821	MTP1	2H	88.7437	101.303	2HL	2HL	2366	7497
0726G22	1_0475	11_10475	3469-1152		1821	MTP3	2H	88.7437	101.303	2HL	2HL	5179	8090
0428N22	2_1245	11_21245	7612-375		4017	MTP3	2H	89.3202	101.719	2HL	2HL	10364	19678
0428N22	1_0936	12_10936	7804-582		4564	MTP3	2H	89.3202	101.719	2HL	2HL	10364	19678
0466P10	1_1058	11_11058	ABC02258-1-6-382		14875	MTP3	2H	90.1022	102.379	2HL	2HL	2382	10039
0622F16	1_0969	12_10969	8397-432		4966	MTP7	2H	90.1022	102.379	2HL	2HL	734	3504
0390M06	2_0793	12_20793	4694-1865		16242	MTP6	2H	90.818	103.126	2HL	2HL	2200	5935
0697B13	2_0793	12_20793	4694-1865		16242	MTP8	2H	90.818	103.126	2HL	2HL	2200	5935
0145M04	1_0214	11_10214	2020-539		1061	MTP4	2H	93.5019	105.622	2HL	2HL	2732	5455
0053K22	2_0080	11_20080	11591-265		19588	MTP4	2H	95.6425	107.041	2HL	2HL	3172	16763
0755A13	2_0080	11_20080	11591-265		19588	MTP3	2H	95.6425	107.041	2HL	2HL	6287	12397
0100N21	1_0649	12_10649	4419-1392		16905	MTP4	2H	96.8221	108.576	2HL	2HL	377	3997
0100O08	1_0649	12_10649	4419-1392		16905	MTP4	2H	96.8221	108.576	2HL	2HL	4181	7575
0108J06	1_0649	12_10649	4419-1392		16905	MTP4	2H	96.8221	108.576	2HL	2HL	155	7802
0382J15	1_1285	12_11285	ABC11853-1-2-343		19697	MTP3	2H	96.8221	108.576	2HL	2HL	5104	6041
0401N12	1_0649	12_10649	4419-1392		16905	MTP3	2H	96.8221	108.576	2HL	2HL	8148	17034
0752P07	1_0649	12_10649	4419-1392		16905	MTP9	2H	96.8221	108.576	2HL	2HL	3200	9422
0686M14	1_1307	11_11307	ABC12856-1-1-77		4864	MTP3	2H	96.8221	109.292	2HL	2HL	1077	4476
0067L10	2_0086	11_20086	11660-365		21251	MTP4	2H	98.5916	110.931	2HL	2HL	2889	13804
0711C08	1_1250	11_11250	ABC10472-1-2-247		3452	MTP3	2H	100.374	111.586	2HL	2HL	9800	5989
0711C08	1_0876	11_10876	682-767		14502	MTP3	2H	100.374	112.259	2HL	2HL	9800	5989
0282J14	1_0398	11_10398	2944-1813		15444	MTP3	2H	100.374	113.531	2HL	2HL	5241	17388
0639M18	3_0200	12_30200		ABC12363_1_220	4022	MTP8	2H	100.374	113.531	2HL	2HL	4920	3200
0010N01	2_0923	11_20923	5347-585		2689	MTP1	2H	100.374	113.531	2HL		1828	17778
0014P04	2_0923	11_20923	5347-585		2689	MTP4	2H	100.374	113.531	2HL		1911	15034
0464G12	1_0900	11_10900	7236-1384		4319	MTP3	2H	101.779	114.345	2HL	2HL	3348
0703F23	2_1527	12_21527	ConsensusGBS0335-1		559	MTP8	2H	101.779	114.345	2HL	2HL	332	3853
0081L20	1_1466	12_11466	ConsensusGBS0272-1		19034	MTP1	2H	101.779	114.345	2HL	6HL	5560	11852
0085B05	1_1466	12_11466	ConsensusGBS0272-1		19034	MTP4	2H	101.779	114.345	2HL	6HL	1392	7393
0593B24	1_1466	12_11466	ConsensusGBS0272-1		19034	MTP3	2H	101.779	114.345	2HL	6HL	5560	1600
0081L20	3_0480	12_30480		U32_3207_632	1391	MTP1	2H	102.495	117.171	2HL	2HL	5560	11852
0085B05	3_0480	12_30480		U32_3207_632	1391	MTP4	2H	102.495	117.171	2HL	2HL	1392	7393
0618N16	3_0480	12_30480		U32_3207_632	1391	MTP7	2H	102.495	117.171	2HL	2HL	5560	11852
0636C24	3_0095	12_30095		ABC08156_1_83	3119	MTP7	2H	102.495	117.171	2HL	2HL	4464	1627
0087K13	1_0630	11_10630	4266-387		16224	MTP1	2H	105.769	117.587	2HL	2HL	7089	17441
0410N15	1_0630	11_10630	4266-387		16224	MTP3	2H	105.769	117.587	2HL	2HL	7089	17441
0064D24	1_1323	11_11323	ABC13569-1-1-107		5994	MTP1	2H	106.465	118.395	2HL	2HL	254	3128
0064D24	3_0555	12_30555		U32_4615_1449	18774	MTP1	2H	106.465	118.395	2HL	2HL	254	3128
0099G24	3_0555	12_30555		U32_4615_1449	18774	MTP4	2H	106.465	118.395	2HL	2HL	9155	171
0256N01	3_0049	12_30049		ABC06173_1_575	16820	MTP5	2H	106.465	118.395	2HL	2HL	4787	3648
0475N12	3_0049	12_30049		ABC06173_1_575	16820	MTP7	2H	106.465	118.395	2HL	2HL	4787	3648
0603O12	1_1323	11_11323	ABC13569-1-1-107		5994	MTP3	2H	106.465	118.395	2HL	2HL	254	3128
0814J17	3_0555	12_30555		U32_4615_1449	18774	MTP3	2H	106.465	118.395	2HL	2HL	254	3128
0524M09	1_1094	11_11094	ABC04580-1-4-420		1742	MTP3	2H	108.605	119.722	2HL	2HL	6037	4620
0169J02	2_0099	11_20099	11979-928		20989	MTP4			124.286	2HL	2HO	584	4967
0698M24	1_0988	11_10988	866-442		14183	MTP3	2H	113.476	124.983	2HL	2HL	4202	924
0698M24	1_0731	11_10731	5088-59		3084	MTP3	2H	113.476	124.983	2HL	2HL	4202	924
0805E17	1_0731	11_10731	5088-59		3084	MTP3	2H	113.476	124.983	2HL	2HL	4202	4835
0805E17	1_0988	11_10988	866-442		14183	MTP3	2H	113.476	124.983	2HL	2HL	4202	4835
0384B05	1_0263	11_10263	2277-634		15438	MTP3	2H	113.476	124.983	2HL		3304	3173
0004N12	1_0990	11_10990	871-462		14187	MTP4	2H	113.476	125.968	2HL	2HL	4409	3191
0004N12	2_1238	11_21238	7487-390		4375	MTP4	2H	113.476	125.968	2HL	2HL	4409	3191
0012M04	1_0990	11_10990	871-462		14187	MTP1	2H	113.476	125.968	2HL	2HL	3758	18571
0012M04	2_1238	11_21238	7487-390		4375	MTP1	2H	113.476	125.968	2HL	2HL	3758	18571
0065M05	1_1043	11_11043	ABC01334-1-1-55		14186	MTP1	2H	113.476	125.968	2HL	2HL	5028	10177
0208F13	2_1238	11_21238	7487-390		4375	MTP3	2H	113.476	125.968	2HL	2HL	4202	4535
0208F13	1_0990	11_10990	871-462		14187	MTP3	2H	113.476	125.968	2HL	2HL	4202	4535
0208F13	1_0989	11_10989	868-675		14184	MTP3	2H	113.476	125.968	2HL	2HL	4202	4535
0593F04	3_1402	12_31402		U35_3795_865	3795	MTP7	2H	113.476	125.968	2HL	2HL	3114	3861
0698M24	1_1043	11_11043	ABC01334-1-1-55		14186	MTP3	2H	113.476	125.968	2HL	2HL	4202	924
0805E17	1_0989	11_10989	868-675		14184	MTP3	2H	113.476	125.968	2HL	2HL	4202	4835
0672H11	1_1236	11_11236	ABC09941-1-1-100		18952	MTP3	2H	115.776	127.742	2HL	2HL	811	1837
0654L07	1_1118	11_11118	ABC05640-1-1-248		2021	MTP3	2H	113.476	128.874	2HL	2HL	8951	12863
0429B21	2_1396	12_21396	9148-259		5725	MTP6	2H	113.92	129.296	2HL	2HL	8060	18931
0626N24	2_1396	12_21396	9148-259		5725	MTP3	2H	113.92	129.296	2HL	2HL	3569	5450
0628D18	2_1396	12_21396	9148-259		5725	MTP3	2H	113.92	129.296	2HL	2HL	3569	5450
0187H10	1_0429	11_10429	3180-1771		1749	MTP4	2H	115.08	130.378	2HL	2HL	9905	19725
0187H10	2_0989	12_20989	5766-399		17712	MTP4	2H	115.08	130.378	2HL	2HL	9905	19725
0253O02	1_0429	11_10429	3180-1771		1749	MTP3	2H	115.08	130.378	2HL	2HL	10137	19817
0253O02	2_0989	12_20989	5766-399		17712	MTP3	2H	115.08	130.378	2HL	2HL	10137	19817
0396M01	1_0538	11_10538	3763-595		12	MTP3	2H	116.491	133.039	2HL	2HL	3801	5125
0396M01	3_1095	12_31095		U35_14464_179	14464	MTP3	2H	116.491	133.039	2HL	2HL	3801	5125
0679M14	3_1095	12_31095		U35_14464_179	14464	MTP8	2H	116.491	133.039	2HL	2HL	3801	5125
0679O07	1_0538	11_10538	3763-595		12	MTP3	2H	116.491	133.039	2HL	2HL	2026	12855
0679O07	3_1095	12_31095		U35_14464_179	14464	MTP3	2H	116.491	133.039	2HL	2HL	2026	12855
0396G09	1_0404	11_10404	3000-1074		1395	MTP3	2H	117.201	133.706	2HL	2HL	9880	3114
0106B14	1_0739	12_10739	5161-1809		2785	MTP1	2H	117.704	134.294	2HL	2HL	1542	17791
0563I19	1_0739	12_10739	5161-1809		2785	MTP3	2H	117.704	134.294	2HL	2HL	1542	17791
0031L21	1_0916	11_10916	7576-818		18600	MTP1	2H	117.91	134.355	2HL	2HL	657	2004
0654O09	3_0598	12_30598		U32_5408_830	1942	MTP3	2H	119.308	135.676	2HL	2HL	4966	16961
0654O09	3_1264	12_31264		U35_1943_367	1943	MTP3	2H	119.308	135.676	2HL	2HL	4966	16961
0090J22	2_1220	11_21220	7302-240		18708	MTP4	2H	120.024	136.331	2HL	2HL	4890	263
0350B05	3_1406	12_31406		U35_3838_1716	3838	MTP6	2H	119.049	136.331	2HL	2HL	2165	3156
0673O17	3_1406	12_31406		U35_3838_1716	3838	MTP8	2H	119.049	136.331	2HL	2HL	2165	3156
0231O11	1_0780	11_10780	5541-418		3326	MTP3	2H	119.049	137.034	2HL	2HL	10027	16961
0411N11	2_0511	11_20511	3256-1196		235	MTP3	2H	120.799	137.034	2HL	2HL	1522	3217
0611I21	1_0780	11_10780	5541-418		3326	MTP3	2H	119.049	137.034	2HL	2HL	4966	16961
0079C06	3_0636	12_30636		U32_6189_94	2844	MTP4	2H	122.211	138.037	2HL	2HS	9230	841
0394K16	3_0636	12_30636		U32_6189_94	2844	MTP6	2H	122.211	138.037	2HL	2HS	10477	19684
0090G21	1_1365	11_11365	ABC16258-1-1-77		7045	MTP1	2H	121.502	138.037	2HL	2HL	1522	3217
0363M06	3_0152	12_30152		ABC10730_2_206	18476	MTP3	2H	122.211	138.037	2HL	2HL	1052	8796
0363M07	3_0152	12_30152		ABC10730_2_206	18476	MTP6	2H	122.211	138.037	2HL	2HL	9622	18906
0456E19	3_0152	12_30152		ABC10730_2_206	18476	MTP3	2H	122.211	138.037	2HL	2HL	1052	8796
0585B17	1_1365	11_11365	ABC16258-1-1-77		7045	MTP3	2H	121.502	138.037	2HL	2HL	1522	3217
0319J07	3_0097	12_30097		ABC08212_1_434	16948	MTP5	2H	121.502	139.285	2HL	2HL	9036	3295
0099H03	1_0446	11_10446	3271-1422		16057	MTP4	2H	125.465	140.692	2HL	2HL	3851	4172
0183N14	2_0480	11_20480	3108-232		15818	MTP3	2H	126.028	140.692	2HL	2HL	797	10300
0283D07	2_0480	11_20480	3108-232		15818	MTP3	2H	126.028	140.692	2HL	2HL	797	10300
0594K11	1_0446	11_10446	3271-1422		16057	MTP3	2H	125.465	140.692	2HL	2HL	3824	5188
0717G21	3_0695	12_30695		U32_7281_349	4023	MTP8	2H	127.638	142.007	2HL	2HL	5464	16097
0384O12	2_1370	11_21370	8817-798		18767	MTP3	2H	125.465	143.176	2HL	2HL	5575	18287
0709M05	1_1486	11_11486	ConsensusGBS0379-1		2001	MTP3	2H	127.062	143.176	2HL	2HL	2447	3016
0709M05	2_1459	11_21459	ABC01791-1-1-110		14559	MTP3	2H	127.062	143.176	2HL	2HL	2447	3016
0724H21	1_1486	11_11486	ConsensusGBS0379-1		2001	MTP3	2H	127.062	143.176	2HL	2HL	2447	3016
0724H21	2_1459	11_21459	ABC01791-1-1-110		14559	MTP3	2H	127.062	143.176	2HL	2HL	2447	3016
0019J10	1_0109	11_10109	1486-908		605	MTP1	2H	127.638	143.714	2HL	2HL	2447	3016
0724H21	1_0109	11_10109	1486-908		605	MTP3	2H	127.638	143.714	2HL	2HL	2447	3016
0203C19	3_0041	12_30041		ABC05638_1_64	1238	MTP5	2H	127.638	143.714	2HL	3HS	3824	5253
0230H03	3_0041	12_30041		ABC05638_1_64	1238	MTP5	2H	127.638	143.714	2HL	3HS	3897	12914
0290O09	3_0041	12_30041		ABC05638_1_64	1238	MTP5	2H	127.638	143.714	2HL	3HS	2207	1758
0351G05	3_0041	12_30041		ABC05638_1_64	1238	MTP6	2H	127.638	143.714	2HL	3HS	1058	15802
0724H21	2_0183	12_20183	1486-1515		605	MTP3	2H	127.638	145.029	2HL	2HL	2447	3016
0263C22	3_0690	12_30690		U32_7166_403	3696	MTP5	2H	128.261	145.69	2HL	2HL	2675	14479
0753M04	1_0656	11_10656	4472-658		1990	MTP3	2H	128.261	145.69	2HL	2HL	2675	17939
0753M04	2_0366	11_20366	2464-1228		15516	MTP3	2H	128.261	145.69	2HL	2HL	2675	17939
0753M04	3_0690	12_30690		U32_7166_403	3696	MTP3	2H	128.261	145.69	2HL	2HL	2675	17939
0681M23	2_1125	11_21125	6652-209		17846	MTP3	2H	129.315	146.718	2HL	2HL	6268	6901
0141N23	1_0065	11_10065	1250-923		13780	MTP2	2H	130.011	147.372	2HL	2HL	1307	1961
0183J18	1_0383	11_10383	285-2932		14211	MTP4	2H	130.011	147.372	2HL	2HL	2840	5226
0244O10	1_0472	12_10472	3457-88		16283	MTP3	2H	130.011	147.372	2HL	2HL	1307	2603
0262C24	1_0472	12_10472	3457-88		16283	MTP3	2H	130.011	147.372	2HL	2HL	1307	2603
0287K15	3_1268	12_31268		U35_19537_1015	19537	MTP5	2H	130.011	147.372	2HL	2HL	7463	19132
0616O15	1_0472	12_10472	3457-88		16283	MTP3	2H	130.011	147.372	2HL	2HL	10519	19874
0667B13	3_0678	12_30678		U32_7077_588	3995	MTP8	2H	130.011	147.372	2HL	2HL	5602	1045
0681M23	3_0942	12_30942		SCRI_bbc02620_01_129	834	MTP3	2H	130.011	147.372	2HL	2HL	6268	6901
0681M23	1_0164	12_10164	1767-1619		834	MTP3	2H	130.011	147.372	2HL	2HL	6268	6901
0685D16	3_1268	12_31268		U35_19537_1015	19537	MTP8	2H	130.011	147.372	2HL	2HL	10369	19730
0774O01	2_0215	11_20215	1613-291		1221	MTP3	2H	130.011	147.372	2HL	2HL	3729	2649
0045D06	1_0376	11_10376	2822-739		14800	MTP4	2H	131.767	149.275	2HL	2HL	2983	13600
0121H03	2_0895	11_20895	5211-1755		2940	MTP4	2H	131.767	149.275	2HL	2HL	8050	1221
0503N18	1_1227	11_11227	ABC09559-1-2-143		4405	MTP3	2H	133.225	149.275	2HL	2HL	2844	4522
0663E22	1_0376	11_10376	2822-739		14800	MTP3	2H	131.767	149.275	2HL	2HL	2844	4522
0663E22	1_1227	11_11227	ABC09559-1-2-143		4405	MTP3	2H	133.225	149.275	2HL	2HL	2844	4522
0395D21	1_0579	12_10579	3988-933		16267	MTP6	2H	132.483	149.929	2HL	2HL	4182	16980
0318C21	3_0106	12_30106		ABC08739_1_112	19212	MTP5	2H	133.941	151.918	2HL	2HL	10199	11508
0478I11	3_0396	12_30396		U32_1731_424	15016	MTP7	2H	133.941	151.918	2HL	2HL	5757	6448
0778H12	3_0396	12_30396		U32_1731_424	15016	MTP9	2H	133.941	151.918	2HL	2HL	5757	6448
0803J01	3_0248	12_30248		ABC15411_1_155	16882	MTP9	2H	136.797	154.028	2HL	2HL	9718	19448
0037K15	2_1274	11_21274	7826-869		4384	MTP1	2H	137.513	154.389	2HL	2HL	4228	15105
0464A02	1_0915	12_10915	7574-495		18998	MTP3			154.591	2HL	2HL	1899	712
0150G19	3_0341	12_30341		U32_11937_312	7141	MTP3	2H	137.513	154.652	2HL	2HL	4228	15105
0274L04	3_0341	12_30341		U32_11937_312	7141	MTP5	2H	137.513	154.652	2HL	2HL	5286	9737
0464A02	2_0590	11_20590	3608-2133		16256	MTP3	2H	137.513	154.652	2HL	2HL	1899	712
0069O03	2_1181	11_21181	6990-661		18463	MTP1			155.68	2HL	2HL	1899	17806
0100O08	2_0027	12_20027	10503-360		5674	MTP4	2H	138.937	155.68	2HL	2HL	4181	7575
0176H03	2_0494	11_20494	3179-497		1764	MTP4	2H	139.653	155.68	2HL	2HL	6240	5564
0257N06	1_0826	11_10826	6157-1233		17949	MTP3	2H	139.653	155.68	2HL	2HL	3406	4574
0277E09	2_1181	11_21181	6990-661		18463	MTP3			155.68	2HL	2HL	1899	17806
0330G10	2_0027	12_20027	10503-360		5674	MTP6	2H	138.937	155.68	2HL	2HL	5732	19488
0362M06	3_1461	12_31461		U35_5285_326	5285	MTP6	2H	138.937	155.68	2HL	2HL	6052	3241
0623B06	2_0027	12_20027	10503-360		5674	MTP7	2H	138.937	155.68	2HL	2HL	5732	6659
0729N13	3_1461	12_31461		U35_5285_326	5285	MTP8	2H	138.937	155.68	2HL	2HL	8688	3285
0008H15	3_0914	12_30914		SCRI_abc07356_01_1	15644	MTP1	2H	139.653	156.769	2HL	2HL	3406	3219
0015F16	1_0625	11_10625	4240-749		16826	MTP1	2H	139.653	156.769	2HL	2HL	2484	3563
0021I05	1_0625	11_10625	4240-749		16826	MTP4	2H	139.653	156.769	2HL	2HL	7433	11035
0052O09	1_0625	11_10625	4240-749		16826	MTP1	2H	139.653	156.769	2HL	2HL	2484	3563
0114P01	1_0625	11_10625	4240-749		16826	MTP4	2H	139.653	156.769	2HL	2HL	2826	2010
0243H12	3_1209	12_31209		U35_1801_2794	1801	MTP5	2H	139.653	156.769	2HL	2HL	4298	5057
0257N06	1_1262	11_11262	ABC10785-1-1-82		4866	MTP3	2H	139.653	156.769	2HL	2HL	3406	4574
0365D12	3_0352	12_30352		U32_12401_495	19233	MTP6	2H	139.653	156.769	2HL	2HL	7041	11212
0367K09	3_0914	12_30914		SCRI_abc07356_01_1	15644	MTP6	2H	139.653	156.769	2HL	2HL	2806	1430
0556C24	3_0914	12_30914		SCRI_abc07356_01_1	15644	MTP3	2H	139.653	156.769	2HL	2HL	3406	3219
0797I04	1_0551	11_10551	3840-348		16569	MTP3	2H	139.653	156.769	2HL	2HL	2015	9139
0169M06	1_0566	11_10566	3910-1648		16316	MTP4	2H	140.269	157.258	2HL	2HL	4346	1485
0071B20	1_0766	12_10766	5383-999		17405	MTP1	2H	141.283	158.176	2HL	2HL	10	4458
0193J19	2_0518	12_20518	3294-439		1684	MTP3	2H	141.283	158.176	2HL	2HL	3629	4551
0333M10	1_0447	12_10447	3292-418		1682	MTP3	2H	141.283	158.176	2HL	2HL	2702	637
0382I03	2_0518	12_20518	3294-439		1684	MTP3	2H	141.283	158.176	2HL	2HL	3629	4551
0363I16	1_0315	11_10315	252-556		1190	MTP3	2H	141.283	158.176	2HL		500	3097
0385I04	1_0315	11_10315	252-556		1190	MTP3	2H	141.283	158.176	2HL		500	3097
0071B20	1_0714	11_10714	4879-1560		17013	MTP1	2H	143.596	159.111	2HL		10	4458
0187J03	1_0714	11_10714	4879-1560		17013	MTP3	2H	143.596	159.111	2HL		10	4458
0071B20	2_1250	11_21250	7655-579		19048	MTP1	2H	144.312	159.619	2HL	2HL	10	4458
0182A10	1_0487	12_10487	3536-89		16111	MTP4	2H	144.312	159.619	2HL	2HL	933	18188
0187J03	2_1250	11_21250	7655-579		19048	MTP3	2H	144.312	159.619	2HL	2HL	10	4458
0734A12	1_0487	12_10487	3536-89		16111	MTP3	2H	144.312	159.619	2HL	2HL	4249	16975
0136E24	1_1380	11_11380	ABC17314-1-1-226		21359	MTP2	2H	145.028	160.463	2HL	2HL	10438	5304
0315L22	1_1368	12_11368	ABC16528-pHv407		20945	MTP3			160.463	2HL	2HL	860	6120
0414D01	2_0994	11_20994	5784-213		17512	MTP3	2H	147.122	160.463	2HL	2HL	740	5171
0711G14	1_0181	12_10181	1868-1311		14488	MTP3	2H	147.122	160.463	2HL	2HL	9442	2798
0712I20	1_0181	12_10181	1868-1311		14488	MTP3	2H	147.122	160.463	2HL	2HL	9442	2798
0727J23	1_1368	12_11368	ABC16528-pHv407		20945	MTP3			160.463	2HL	2HL	860	6120
0774L04	1_1380	11_11380	ABC17314-1-1-226		21359	MTP3	2H	145.028	160.463	2HL	2HL	10372	5304
0118J03	1_0791	11_10791	570-1376		1738	MTP2	2H	150.667	164.354	2HL	2HL	4519	17908
0291M19	3_0823	12_30823		OSU_Aglu5_366	5962	MTP5	2H	150.667	164.354	2HL	2HL	6319	14695
0362K15	1_0791	11_10791	570-1376		1738	MTP3	2H	150.667	164.354	2HL	2HL	4519	17908
0328B15	1_0072	11_10072	1283-332		14693	MTP3	2H	151.37	165.284	2HL	2HL	1647	11777
0072I19	3_1506	12_31506		U35_6860_433	6860	MTP4	2H	152.795	166.599	2HL	2HL	8667	1703
0121C07	3_1506	12_31506		U35_6860_433	6860	MTP4	2H	152.795	166.599	2HL	2HL	3607	13457
0747H24	3_1506	12_31506		U35_6860_433	6860	MTP8	2H	152.795	166.599	2HL	2HL	140	4998
0097I23	1_0770	11_10770	5419-760		2801	MTP4			167.657	2HL	2HL	2693	18113
0186D19	1_0770	11_10770	5419-760		2801	MTP3			167.657	2HL	2HL	2050	1023
0658J09	1_0770	11_10770	5419-760		2801	MTP3			167.657	2HL	2HL	2050	1023
0658J09	2_1099	11_21099	6419-1680		18223	MTP3	2H	155.3	168.257	2HL	2HL	2050	1023
0658J09	2_1453	11_21453	9910-427		20367	MTP3	2H	155.3	168.257	2HL	2HL	2050	1023
0176J17	1_0329	11_10329	2592-1237		1302	MTP4	2H	155.3	168.257	2HL		1557	1390
0398I10	1_0085	11_10085	1344-930		15056	MTP3	2H	156.725	169.664	2HL	2HL	1808	2655
0412I03	1_1050	12_11050	ABC01852-1-1-214		13826	MTP6	2H	156.725	169.664	2HL	2HL	303	16785
0045L05	2_0561	11_20561	3450-692		1915	MTP4	2H	156.725	169.664	2HL		7775	15954
0447I13	3_0378	12_30378		U32_14697_157	20178	MTP7	2H	158.865	171.603	2HL	2HL	6849	147
0097I23	3_0102	12_30102		ABC08520_1_180	17805	MTP4	2H	160.29	172.918	2HL	2HL	2693	18113
0110I03	3_0102	12_30102		ABC08520_1_180	17805	MTP4	2H	160.29	172.918	2HL	2HL	124	7249
0485J19	3_0102	12_30102		ABC08520_1_180	17805	MTP7	2H	160.29	172.918	2HL	2HL	10037	13020
0603C05	3_0102	12_30102		ABC08520_1_180	17805	MTP7	2H	160.29	172.918	2HL	2HL	10037	13020
0196C23	2_0858	11_20858	5029-1423		17376	MTP4	3H	0	0	3HS	3HS	2845	8440
0082A23	2_0090	12_20090	1173-2131		14665	MTP4	3H	0	3.97014	3HS	3HS	5586	4575
0220J19	1_0103	12_10103	1453-346		14930	MTP3	3H	2.90014	3.97014	3HS	3HS	2223	2007
0387C21	1_0103	12_10103	1453-346		14930	MTP3	3H	2.90014	3.97014	3HS	3HS	9780	4573
0492I15	1_0103	12_10103	1453-346		14930	MTP3	3H	2.90014	3.97014	3HS	3HS	2223	2007
0629M12	1_0103	12_10103	1453-346		14930	MTP7	3H	2.90014	3.97014	3HS	3HS	2792	6788
0104I17	1_1434	12_11434	ConsensusGBS0031-1		11324	MTP1	3H	3.70614	6.31307	3HS	3HS	2223	2007
0220J19	3_1448	12_31448		U35_4975_534	4975	MTP3	3H	2.90014	6.31307	3HS	3HS	2223	2007
0492I15	3_1448	12_31448		U35_4975_534	4975	MTP3	3H	2.90014	6.31307	3HS	3HS	2223	2007
0180P22	2_0252	11_20252	1831-241		911	MTP4	3H	6.03057	8.90682	3HS	3HS	3967	3299
0180P22	1_0173	12_10173	1835-432		915	MTP4	3H	6.03057	8.90682	3HS	3HS	3967	3299
0042F07	2_0953	11_20953	5533-340		2959	MTP4	3H	6.69983	9.56137	3HS	3HS	256	13707
0342K07	3_1409	12_31409		U35_3907_2125	3907	MTP6	3H	6.69983	9.56137	3HS	3HS	1635	15248
0240F17	2_1190	11_21190	7060-1237		3760	MTP3	3H	8.23266	11.0112	3HS	3HS	10121	4516
0240F17	2_1398	11_21398	918-480		14149	MTP3	3H	8.23266	11.0112	3HS	3HS	10121	4516
0717N09	3_0297	12_30297		AF521177_HvHGA1_MX_CDS_1440	15715	MTP8	3H	8.23266	11.0112	3HS	3HS	3279	3693
0758K18	2_1398	11_21398	918-480		14149	MTP3	3H	8.23266	11.0112	3HS	3HS	10121	4516
0032K11	1_1310	12_11310	ABC12999-1-3-174		16772	MTP1	3H	10.8018	13.1278	3HS	3HS	9202	6113
0033B10	1_1310	12_11310	ABC12999-1-3-174		16772	MTP4	3H	10.8018	13.1278	3HS	3HS	6409	728
0661O14	1_1310	12_11310	ABC12999-1-3-174		16772	MTP3	3H	10.8018	13.1278	3HS	3HS	10094	6079
0661O14	1_1310	12_11310	ABC12999-1-3-174		16772	MTP8	3H	10.8018	13.1278	3HS	3HS	10094	6079
0663L09	1_0886	11_10886	7044-705		18300	MTP3	3H	10.8018	13.7823	3HS	3HS	9950	243
0219O21	3_0910	12_30910		SCRI_abc04112_02_2	1098	MTP5	3H	10.8018	13.9964	3HS	3HS	9846	3366
0489F09	3_0915	12_30915		SCRI_abc07947_01_1	17334	MTP3	3H	13.227	14.9079	3HS	3HS	4205	3602
0751K17	2_0595	11_20595	3646-1984		1968	MTP3	3H	12.4569	14.9079	3HS	3HS	4205	3602
0751K17	3_0915	12_30915		SCRI_abc07947_01_1	17334	MTP3	3H	13.227	14.9079	3HS	3HS	4205	3602
0074C15	3_0113	12_30113		ABC09033_1_40	3914	MTP4	3H	15.5514	17.6607	3HS	3HS	5503	9776
0324B17	3_0113	12_30113		ABC09033_1_40	3914	MTP3	3H	15.5514	17.6607	3HS	3HS	4476	7227
0324I09	3_0113	12_30113		ABC09033_1_40	3914	MTP3	3H	15.5514	17.6607	3HS	3HS	9777	13473
0341J01	1_0571	12_10571	3950-1500		16410	MTP3	3H	15.5514	18.2051	3HS	3HS	531	16879
0659M07	1_0571	12_10571	3950-1500		16410	MTP3	3H	15.5514	18.2051	3HS	3HS	531	16879
0575M11	1_0565	11_10565	3906-558		16130	MTP3	3H	19.1496	21.5758	3HS	3HS	3313	4520
0044C15	3_0192	12_30192		ABC11988_1_747	3801	MTP4	3H	23.4458	25.5337	3HS	3HS	701	19714
0263A06	3_0920	12_30920		SCRI_abc16651_02_484	6646	MTP3	3H	24.993	26.7143	3HS	3HS	993	2313
0413E10	1_0559	11_10559	3886-313		2304	MTP3	3H	24.993	26.7143	3HS	3HS	993	2313
0686L20	3_0920	12_30920		SCRI_abc16651_02_484	6646	MTP3	3H	24.993	26.7143	3HS	3HS	6414	4660
0686L20	3_0920	12_30920		SCRI_abc16651_02_484	6646	MTP8	3H	24.993	26.7143	3HS	3HS	6414	4660
0144A21	2_0794	11_20794	4701-2395		2635	MTP2	3H	26.9001	28.0234	3HS	3HS	6414	4660
0204B05	2_0794	11_20794	4701-2395		2635	MTP3	3H	26.9001	28.0234	3HS	3HS	6414	4660
0263F20	2_0794	11_20794	4701-2395		2635	MTP3	3H	26.9001	28.0234	3HS	3HS	6414	4660
0499L21	1_1237	12_11237	ABC09978-1-2-154		17731	MTP3	3H	28.4401	29.094	3HS	3HS	10196	4565
0084C23	2_0968	11_20968	5646-568		3028	MTP1	3H	28.4401	29.7546	3HS	3HS		17972
0336O12	3_0284	12_30284		ABC22737_1_28	26260	MTP6	3H	28.4401	29.7546	3HS	3HS	4665	11209
0355H11	2_0455	11_20455	2995-717		15962	MTP3	3H	28.4401	29.7546	3HS	3HS	502	5963
0383F12	3_0284	12_30284		ABC22737_1_28	26260	MTP6	3H	28.4401	29.7546	3HS	3HS	8285	18887
0577K01	2_0455	11_20455	2995-717		15962	MTP3	3H	28.4401	29.7546	3HS	3HS	502	5963
0697N09	3_0571	12_30571		U32_4926_1136	2392	MTP8	3H	32.8299	32.9234	3HS	3HS	6230	14666
0762F24	2_0607	11_20607	3688-1291		16189	MTP3	3H	32.8299	32.9234	3HS	3HS	10120	19749
0768L23	3_0571	12_30571		U32_4926_1136	2392	MTP9	3H	32.8299	32.9234	3HS	3HS	3243	8049
0182A10	1_1414	12_11414	ABC52215-pHv1348-01		50174	MTP4	3H	32.8299	34.1469	3HS	3HS	933	18188
0182A10	1_0026	11_10026	1074-992		14505	MTP4	3H	32.8299	34.1469	3HS	3HS	933	18188
0369B11	1_1527	12_11527	ConsensusGBS0667-8		8430	MTP6	3H	32.8299	34.1469	3HS	3HS	7233	18880
0374F24	1_1527	12_11527	ConsensusGBS0667-8		8430	MTP6	3H	32.8299	34.1469	3HS	3HS	3818	4552
0395N09	1_0026	11_10026	1074-992		14505	MTP3	3H	32.8299	34.1469	3HS	3HS	2787	10124
0395N09	1_1414	12_11414	ABC52215-pHv1348-01		50174	MTP3	3H	32.8299	34.1469	3HS	3HS	2787	10124
0598M18	1_1527	12_11527	ConsensusGBS0667-8		8430	MTP3	3H	32.8299	34.1469	3HS	3HS	3818	4582
0443G05	2_1268	12_21268	7788-203		18471	MTP3	3H	32.8299	35.9515	3HS	3HS	7018	15374
0477N03	2_1268	12_21268	7788-203		18471	MTP3	3H	32.8299	35.9515	3HS	3HS	6720	15368
0656O17	3_0431	12_30431		U32_2436_2433	15527	MTP8	3H	35.2191	35.9515	3HS	3HS	1751	4274
0064J07	3_0925	12_30925		SCRI_abc21967_01_1	22926	MTP4	3H	37.1693	37.6154	3HS	3HS	7120	5292
0584G09	3_0925	12_30925		SCRI_abc21967_01_1	22926	MTP3	3H	37.1693	37.6154	3HS	3HS	511	13651
0431C22	1_0825	11_10825	6156-1399		2213	MTP3	3H	39.4506	39.9155	3HS	3HS	2523	17794
0554J15	1_0825	11_10825	6156-1399		2213	MTP3	3H	39.4506	39.9155	3HS	3HS	2523	17794
0431C22	3_0953	12_30953		SCRI_bbc06156_01_472	2213	MTP3	3H	40.9978	40.9922	3HS	3HS	2523	17794
0554J15	3_0953	12_30953		SCRI_bbc06156_01_472	2213	MTP3	3H	40.9978	40.9922	3HS	3HS	2523	17794
0270K08	2_0193	11_20193	15141-257		6413	MTP3	3H	42.0629	42.3135	3HS	3HS	6208	18293
0270K08	1_0114	12_10114	15141-288		6413	MTP3	3H	42.0629	42.3135	3HS		6208	18293
0109N23	2_0647	11_20647	3933-1077		16591	MTP4	3H	43.2287	43.9591	3HS	3HS	2411	1416
0737E19	1_1002	11_11002	9018-522		4571	MTP3	3H	43.9915	48.021	3HS	3HS	6914	18312
0341M04	1_1117	12_11117	ABC05532-1-4-411		783	MTP3	3H	44.7615	48.8774	3HS	3HS	298	12002
0341M04	2_1506	12_21506	ABC16710-1-2-189		21316	MTP3	3H	44.7615	48.8774	3HS	3HS	298	12002
0341M04	3_0913	12_30913		SCRI_abc05532_02_1	783	MTP3	3H	44.7615	48.8774	3HS	3HS	298	12002
0157P13	2_1259	11_21259	7738-324		19088	MTP3	3H	44.7615	48.8774	3HS		298	12002
0341M04	2_1259	11_21259	7738-324		19088	MTP3	3H	44.7615	48.8774	3HS		298	12002
0123P19	3_1475	12_31475		U35_5532_765	5532	MTP4	3H	45.5387	49.5319	3HS	3HS	10063	19876
0124H21	3_1475	12_31475		U35_5532_765	5532	MTP4	3H	45.5387	49.5319	3HS	3HS	324	6186
0773A14	3_0785	12_30785		U32_9354_684	19941	MTP9	3H	45.5387	49.5319	3HS	3HS	545	520
0013E02	3_0064	12_30064		ABC06946_1_359	3083	MTP4	3H	46.3087	50.1926	3HS	3HS	1104	5548
0809M03	3_1009	12_31009		SCRI_olad_176_03	19359	MTP9	3H	48.6332	50.8533	3HS	3HS	2794	3631
0663K11	1_1069	12_11069	ABC03043-1-1-113		14127	MTP3	3H	49.4104	53.2023	3HS	3HS	4921	4587
0711K23	1_1069	12_11069	ABC03043-1-1-113		14127	MTP3	3H	49.4104	53.2023	3HS	3HS	4921	4587
0255L11	3_0467	12_30467		U32_3096_1267	15917	MTP5	3H	49.4104	53.863	3HS	3HS	7184	793
0396M20	3_0467	12_30467		U32_3096_1267	15917	MTP6	3H	49.4104	53.863	3HS	3HS	7184	16634
0300G07	3_0721	12_30721		U32_7845_180	19047	MTP3	3H	50.1804	55.221	3HS	3HS	1734	68
0610E10	2_1402	11_21402	921-414		14134	MTP3			56.5363	3HS	3HS	3793	19633
0010G18	1_1102	12_11102	ABC04904-1-1-135		1587	MTP1	3H	50.1804	59.8335	3HS	3HS	846	1781
0118A03	2_1093	11_21093	6354-1193		15656	MTP4			59.8335	3HS	3HS	3743	5556
0159M20	3_0737	12_30737		U32_8184_522	18828	MTP4	3H	48.6332	59.8335	3HS	3HS	3816	7702
0234D05	3_1122	12_31122		U35_15712_1129	15712	MTP5	3H	48.6332	59.8335	3HS	3HS	3492	4171
0285O04	1_1102	12_11102	ABC04904-1-1-135		1587	MTP5	3H	50.1804	59.8335	3HS	3HS	3156	1005
0405A22	3_0737	12_30737		U32_8184_522	18828	MTP6	3H	48.6332	59.8335	3HS	3HS	4241	5472
0677B04	1_1102	12_11102	ABC04904-1-1-135		1587	MTP3	3H	50.1804	59.8335	3HS	3HS	846	1781
0358A11	3_1015	12_31015		SCRI_olad_202_01	18534	MTP6	3H	50.9576	60.5798	3HS	3HS	4529	3637
0373O22	3_1015	12_31015		SCRI_olad_202_01	18534	MTP6	3H	50.9576	60.5798	3HS	3HS	5933	17688
0325J13	1_1511	12_11511	ConsensusGBS0587-1		17738	MTP3	3H	51.7276	61.9379	3HS	3HS	3651	10142
0592K03	1_1511	12_11511	ConsensusGBS0587-1		17738	MTP3	3H	51.7276	61.9379	3HS	3HS	171	11137
0680D20	3_0680	12_30680		U32_7084_191	4130	MTP8	3H	51.7276	61.9379	3HS	3HS	7523	15452
0019L08	1_0233	12_10233	2125-1506		872	MTP1	3H	51.7276	63.2531	3HS	3HS	4443	17849
0190L20	1_0233	12_10233	2125-1506		872	MTP3	3H	51.7276	63.2531	3HS	3HS	4443	17849
0552C24	1_0380	11_10380	2838-663		1515	MTP3	3H	51.7276	63.2531	3HS	3HS	549	2597
0652I23	1_0380	11_10380	2838-663		1515	MTP3	3H	51.7276	63.2531	3HS	3HS	549	2597
0612E13	2_0866	11_20866	5058-404		2614	MTP3	3H	52.4976	63.9382	3HS		4547	17007
0414B12	1_1086	11_11086	ABC04214-1-2-360		1568	MTP3	3H	53.2748	64.5989	3HS	3HS	1478	1853
0598P12	3_0618	12_30618		U32_5814_1420	17691	MTP7	3H	53.2748	64.5989	3HS	3HS	320	4137
0010G18	2_1475	12_21475	ABC04904-1-2-311		1587	MTP1	3H	54.4	65.2535	3HS	3HS	846	1781
0061D20	1_0391	12_10391	2913-1920		15851	MTP4	3H	54.4	65.2535	3HS	3HS	1668	6228
0077A18	2_0574	12_20574	3515-379		1732	MTP1	3H	54.4	65.2535	3HS	3HS	3602	17306
0121C04	3_0262	12_30262		ABC17236_1_405	21110	MTP4	3H	54.4	65.2535	3HS	3HS	103	12521
0259O02	1_0391	12_10391	2913-1920		15851	MTP5	3H	54.4	65.2535	3HS	3HS	5453	15442
0305G03	1_1099	11_11099	ABC04826-1-1-174		1591	MTP3	3H	54.4	65.2535	3HS	3HS	586	1784
0375N17	1_0155	12_10155	1738-446		828	MTP6	3H	55.57	65.2535	3HS	3HS	4865	10333
0392F01	2_0574	12_20574	3515-379		1732	MTP3	3H	54.4	65.2535	3HS	3HS	3602	17306
0496M21	1_1295	12_11295	ABC12277-3-1-268		4796	MTP3	3H	54.4	65.2535	3HS	3HS	8603	6106
0503O23	1_1501	11_11501	ConsensusGBS0471-1		2827	MTP3	3H	54.4	65.2535	3HS	3HS	995	6835
0527C06	3_0130	12_30130		ABC09756_1_341	4059	MTP7	3H	54.4	65.2535	3HS	3HS	1491	10484
0569M22	1_1265	12_11265	ABC10847-1-2-167		4241	MTP3	3H	54.4	65.2535	3HS	3HS	10069	105
0588G12	1_1295	12_11295	ABC12277-3-1-268		4796	MTP7	3H	54.4	65.2535	3HS	3HS	10488	5523
0588G12	1_1295	12_11295	ABC12277-3-1-268		4796	MTP3	3H	54.4	65.2535	3HS	3HS	10488	5523
0604C09	1_1518	12_11518	ConsensusGBS0639-2		3547	MTP3	3H	54.4	65.2535	3HS	3HS	4880	10152
0608M22	3_0318	12_30318		U32_10491_165	4917	MTP7	3H	54.4	65.2535	3HS	3HS	5484	4255
0609B08	3_1008	12_31008		SCRI_olad_172	13979	MTP7	3H	54.4	65.2535	3HS	3HS	7084	15377
0646H19	1_1518	12_11518	ConsensusGBS0639-2		3547	MTP3	3H	54.4	65.2535	3HS	3HS	4880	10152
0677B04	2_1475	12_21475	ABC04904-1-2-311		1587	MTP3	3H	54.4	65.2535	3HS	3HS	846	1781
0689E09	1_0155	12_10155	1738-446		828	MTP3	3H	55.57	65.2535	3HS	3HS	3296	9214
0731J16	3_0262	12_30262		ABC17236_1_405	21110	MTP8	3H	54.4	65.2535	3HS	3HS	39	1360
0742C03	1_1501	11_11501	ConsensusGBS0471-1		2827	MTP3	3H	54.4	65.2535	3HS	3HS	995	6835
0777P15	1_1502	11_11502	ConsensusGBS0508-1		667	MTP3	3H	54.4	65.2535	3HS	3HS	3895	15102
0171F23	1_0137	11_10137	1630-1150		14838	MTP4	3H	54.4	65.2535	3HS		40	6167
0020F16	2_0486	11_20486	3143-1276		1570	MTP4	3H	56.4	67.8594	3HL	3HL	5348	13907
0086D22	2_1472	11_21472	ABC04375-1-1-173		1755	MTP1	3H	56.4	67.8594	3HL	3HL	8164	1918
0097C14	1_0966	11_10966	8383-349		4630	MTP4	3H	56.4	67.8594	3HL	3HL	4347	13863
0121M20	3_1502	12_31502		U35_6656_330	6656	MTP4	3H	55.57	67.8594	3HL	3HL	237	5336
0123G06	3_1502	12_31502		U35_6656_330	6656	MTP4	3H	55.57	67.8594	3HL	3HL	140	4998
0140A01	2_0288	11_20288	2027-1307		1030	MTP4	3H	56.4	67.8594	3HL	3HL	1656	7380
0140J01	2_0439	11_20439	2897-208		15730	MTP2	3H	56.4	67.8594	3HL	3HL	9279	17946
0144D09	2_0439	11_20439	2897-208		15730	MTP4	3H	56.4	67.8594	3HL	3HL	2306	10650
0144G09	1_0008	11_10008	10248-954		19973	MTP2	3H	56.4	67.8594	3HL	3HL	5126	18279
0150K21	2_0002	11_20002	10012-1239		19659	MTP3	3H	56.4	67.8594	3HL	3HL	48	18212
0162N03	3_1502	12_31502		U35_6656_330	6656	MTP4	3H	55.57	67.8594	3HL	3HL	5753	6449
0186P23	2_0002	11_20002	10012-1239		19659	MTP3	3H	56.4	67.8594	3HL	3HL	48	18212
0266D14	1_0224	11_10224	2066-1133		15396	MTP3	3H	56.4	67.8594	3HL	3HL	3814	6343
0305L20	2_0333	11_20333	2288-126		1155	MTP3	3H	56.4	67.8594	3HL	3HL	1212	16884
0372P17	1_1482	12_11482	ConsensusGBS0364-1		16534	MTP6	3H	56.4	67.8594	3HL	3HL	8154	10200
0374K16	2_1472	11_21472	ABC04375-1-1-173		1755	MTP3	3H	56.4	67.8594	3HL	3HL	8164	1918
0374M17	2_0721	12_20721	4261-3175		16376	MTP6	3H	56.4	67.8594	3HL	3HL	3407	4177
0386O21	1_0349	11_10349	2676-256		1439	MTP3	3H	56.4	67.8594	3HL	3HL	1931	2621
0394B01	3_0126	12_30126		ABC09585_1_277	18890	MTP6	3H	56.4	67.8594	3HL	3HL	6828	12136
0395P11	3_1012	12_31012		SCRI_olad_183	9061	MTP6	3H	55.57	67.8594	3HL	3HL	7868	19135
0395P11	3_1014	12_31014		SCRI_olad_193	11625	MTP6	3H	55.57	67.8594	3HL	3HL	7868	19135
0411E22	1_0926	11_10926	7728-341		4356	MTP3	3H	56.4	67.8594	3HL	3HL	9017	17966
0453J06	2_0721	12_20721	4261-3175		16376	MTP7	3H	56.4	67.8594	3HL	3HL	3407	19436
0516E14	1_1530	11_11530	ConsensusGBS0697-1		19757	MTP3	3H	56.4	67.8594	3HL	3HL	10286	1989
0519M08	3_1017	12_31017		SCRI_olad_207	495	MTP3	3H	56.4	67.8594	3HL	3HL	5467	16966
0538D18	1_1530	11_11530	ConsensusGBS0697-1		19757	MTP3	3H	56.4	67.8594	3HL	3HL	10082	1787
0544F02	1_1125	11_11125	ABC05866-1-1-311		17240	MTP3	3H	56.4	67.8594	3HL	3HL	5614	1836
0594E06	2_0288	11_20288	2027-1307		1030	MTP3	3H	56.4	67.8594	3HL	3HL	1283	4159
0598F18	2_0583	11_20583	3567-112		15993	MTP3	3H	56.4	67.8594	3HL	3HL	2187	17287
0606A08	1_0784	12_10784	5610-428		17197	MTP3	3H	55.57	67.8594	3HL	3HL	9782	17795
0609O13	3_1017	12_31017		SCRI_olad_207	495	MTP7	3H	56.4	67.8594	3HL	3HL	9053	17049
0658M11	1_0966	11_10966	8383-349		4630	MTP3	3H	56.4	67.8594	3HL	3HL	308	18215
0686C16	3_1368	12_31368		U35_3077_600	3077	MTP8	3H	56.4	67.8594	3HL	3HL	408	14818
0740G20	2_0333	11_20333	2288-126		1155	MTP3	3H	56.4	67.8594	3HL	3HL	1212	16884
0741C09	1_0349	11_10349	2676-256		1439	MTP3	3H	56.4	67.8594	3HL	3HL	1931	2621
0758H08	1_1283	11_11283	ABC11783-1-1-99		5159	MTP3	3H	56.4	67.8594	3HL	3HL	6589	6101
0758K05	3_0126	12_30126		ABC09585_1_277	18890	MTP9	3H	56.4	67.8594	3HL	3HL	6828	12136
0765L24	1_0926	11_10926	7728-341		4356	MTP3	3H	56.4	67.8594	3HL	3HL	9017	17966
0140A01	1_0437	11_10437	3215-654		15967	MTP4	3H	56.4	67.8594	3HL		1656	7380
0233G10	2_0444	11_20444	2934-1076		1652	MTP3	3H	57.1249	68.5079	3HL	3HL	2147	10120
0284A19	1_1401	11_11401	ABC21245-1-2-275		22515	MTP3	3H	58.01	69.0523	3HL	3HL	4810	1847
0505H18	1_1401	11_11401	ABC21245-1-2-275		22515	MTP3	3H	58.01	69.0523	3HL	3HL	4810	1847
0090E16	3_0009	12_30009		ABC01956_1_787	14757	MTP4	3H	58.6361	69.9454	3HL	3HL	1615	5205
0751D21	3_0009	12_30009		ABC01956_1_787	14757	MTP8	3H	58.6361	69.9454	3HL	3HL	4994	8959
0025K21	1_0005	11_10005	10126-999		16766	MTP1	3H	61.4427	71.2607	3HL	3HL	1351	3378
0196E09	1_0005	11_10005	10126-999		16766	MTP4	3H	61.4427	71.2607	3HL	3HL	2652	2629
0249G08	1_0678	12_10678	4627-1463		2805	MTP5	3H	59.8883	71.2607	3HL	3HL	7382	18787
0315F04	1_0678	12_10678	4627-1463		2805	MTP5	3H	59.8883	71.2607	3HL	3HL	8531	7915
0330I12	3_1016	12_31016		SCRI_olad_204	7049	MTP6	3H	58.6361	71.2607	3HL	3HL	2765	19544
0519K24	1_1429	12_11429	ConsensusGBS0006-2		46831	MTP3	3H	59.8883	71.2607	3HL	3HL	6810	19692
0520H07	1_0678	12_10678	4627-1463		2805	MTP3	3H	59.8883	71.2607	3HL	3HL	10110	16181
0564D03	2_1064	12_21064	6181-908		3553	MTP7	3H	59.8883	71.2607	3HL	3HL	1180	4145
0604A09	1_1429	12_11429	ConsensusGBS0006-2		46831	MTP3	3H	59.8883	71.2607	3HL	3HL	6810	19692
0617L12	1_0678	12_10678	4627-1463		2805	MTP7	3H	59.8883	71.2607	3HL	3HL	5370	2118
0625C16	3_1011	12_31011		SCRI_olad_179_02	21320	MTP7	3H	58.6361	71.2607	3HL	3HL	2720	6288
0735N13	2_1064	12_21064	6181-908		3553	MTP8	3H	59.8883	71.2607	3HL	3HL	1180	4145
0763N11	2_1511	11_21511	ABC18582-1-2-417		8070	MTP3	3H	59.8883	71.2607	3HL	3HL	8136	6100
0204G23	1_0728	11_10728	5038-1035		17346	MTP3	3H	62.9899	72.2088	3HL	3HL	1921	14413
0516J19	1_0728	11_10728	5038-1035		17346	MTP3	3H	62.9899	72.2088	3HL	3HL	1921	14413
0490B13	1_0158	11_10158	1746-1527		15060	MTP3	3H	59.8883	73.2977	3HL	3HL	4086	4527
0490B13	3_0829	12_30829		OSU_Contig2595_at_152	15060	MTP3	3H	59.8883	73.2977	3HL	3HL	4086	4527
0627O11	2_0863	12_20863	5047-902		16923	MTP3	3H	64.1917	73.2977	3HL	3HL	2528	1803
0758J23	1_0158	11_10158	1746-1527		15060	MTP3	3H	59.8883	73.2977	3HL	3HL	4086	4527
0758J23	3_0829	12_30829		OSU_Contig2595_at_152	15060	MTP3	3H	59.8883	73.2977	3HL	3HL	4086	4527
0799K21	3_0829	12_30829		OSU_Contig2595_at_152	15060	MTP9	3H	59.8883	73.2977	3HL	3HL	6866	14994
0714O24	1_0373	11_10373	2804-1832		15913	MTP3	3H	59.8883	73.9706	3HL	3HL	2060	8040
0226J23	3_0088	12_30088		ABC07831_1_419	17316	MTP5	3H	64.1917	75.2736	3HL	3HL	4926	11376
0602D10	1_1084	12_11084	ABC04158-1-1-332		14263	MTP3	3H	64.1917	75.2736	3HL	3HL	9942	19644
0627O11	1_1150	12_11150	ABC06816-1-11-542		17225	MTP3	3H	64.1917	75.2736	3HL	3HL	2528	1803
0499H23	2_1502	11_21502	ABC14384-1-1-53		5060	MTP3	3H	65.5231	76.4298	3HL	3HL	10391	6083
0015B23	1_1391	11_11391	ABC18717-1-3-215		8186	MTP1	3H	65.5231	77.3719	3HL	3HL	803	14608
0105D06	1_1152	12_11152	ABC06873-1-1-239		2602	MTP4	3H	65.5231	77.3719	3HL	3HL	1779	5702
0112B20	1_1152	12_11152	ABC06873-1-1-239		2602	MTP2	3H	65.5231	77.3719	3HL	3HL	5097	8442
0386D03	1_0335	11_10335	2616-2560		380	MTP3	3H	65.5231	77.3719	3HL	3HL	9311	7843
0650N03	1_0335	11_10335	2616-2560		380	MTP3	3H	65.5231	77.3719	3HL	3HL	9311	7843
0663D08	3_0005	12_30005		ABC01483_1_288	259	MTP3	3H	65.5231	77.3719	3HL	3HL	2224	2643
0762N09	3_0005	12_30005		ABC01483_1_288	259	MTP3	3H	65.5231	77.3719	3HL	3HL	2224	2643
0789N03	1_0839	11_10839	6364-645		3787	MTP3	3H	65.5231	77.3719	3HL	3HL	7295	17935
0021F09	3_0616	12_30616		U32_5731_1803	126	MTP4	3H	68.3225	78.2528	3HL	3HL	7051	2139
0021F09	3_0788	12_30788		U32_9413_179	19516	MTP4	3H	68.3225	78.2528	3HL	3HL	7051	2139
0335E22	2_0608	12_20608	3691-1359		2017	MTP6	3H	65.5231	78.2528	3HL	3HL	7320	14941
0464A07	1_1284	12_11284	ABC11816-1-1-243		18281	MTP3	3H	65.5231	78.2528	3HL	3HL	3016	6002
0726G10	1_1284	12_11284	ABC11816-1-1-243		18281	MTP8	3H	65.5231	78.2528	3HL	3HL	1706	1552
0206P07	1_1394	11_11394	ABC19175-1-2-375		9699	MTP3	3H	69.6034	81.2808	3HL	3HL	10224
0490M17	1_1394	11_11394	ABC19175-1-2-375		9699	MTP3	3H	69.6034	81.2808	3HL	3HL	10224	19713
0009M04	1_0172	11_10172	1827-958		15085	MTP1	3H	69.6034	82.6205	3HL	3HL	7243	15235
0112G15	3_1242	12_31242		U35_18763_863	18763	MTP4	3H	69.6034	82.6205	3HL	3HL	6042	7677
0130I02	1_0172	11_10172	1827-958		15085	MTP4	3H	69.6034	82.6205	3HL	3HL	201	7251
0561H13	3_1242	12_31242		U35_18763_863	18763	MTP7	3H	69.6034	82.6205	3HL	3HL	6224	15154
0198L18	1_0813	11_10813	5960-1302		18053	MTP3			83.5809	3HL	3HL	2168	16918
0399H04	3_1323	12_31323		U35_21958_528	21958	MTP6	3H	70.7117	83.5809	3HL	3HL	6489	12999
0721L03	3_1323	12_31323		U35_21958_528	21958	MTP8	3H	70.7117	83.5809	3HL	3HL	6489	12999
0483D06	3_0754	12_30754		U32_8513_567	18954	MTP7	3H	71.4889	84.2171	3HL	3HL	2572	10512
0161L23	3_1529	12_31529		U35_8623_432	8623	MTP4	3H	72.2589	85.4039	3HL	3HL	8987	4266
0178M02	1_0452	12_10452	3321-2496		1800	MTP3	3H	72.2589	85.4039	3HL	3HL	2822	4495
0235D09	1_0452	12_10452	3321-2496		1800	MTP3	3H	72.2589	85.4039	3HL	3HL	2822	4495
0041I16	2_0521	11_20521	3306-446		16009	MTP4	3H	74.1515	86.0279	3HL	3HL	7834	13892
0151D05	2_0521	11_20521	3306-446		16009	MTP4	3H	74.1515	86.0279	3HL	3HL	8910	16313
0322O03	1_0276	11_10276	2315-702		15496	MTP3	3H	74.7776	86.5662	3HL	3HL	10437	19871
0322O03	3_0399	12_30399		U32_1775_564	815	MTP3	3H	74.7776	86.5662	3HL	3HL	10437	19871
0296G06	1_1454	12_11454	ConsensusGBS0222-2		478	MTP3	3H	78.5269	90.0959	3HL	3HL	4454	10144
0517A10	1_0047	11_10047	1176-1547		14619	MTP3	3H	78.5269	90.0959	3HL	3HL	5699	13933
0567I22	2_1194	12_21194	7098-1465		3980	MTP3	3H	78.5269	90.0959	3HL	3HL	2778	13292
0361K18	3_0170	12_30170		ABC11489_1_1122	17315	MTP6	3H	80.8945	92.7325	3HL	3HL	764	14577
0672B13	1_1524	12_11524	ConsensusGBS0658-1		2989	MTP8	3H	81.6645	92.7325	3HL	3HL	811	10209
0049L15	3_0677	12_30677		U32_7048_390	3906	MTP4	3H	81.6645	93.8091	3HL	3HL	395	14140
0694N21	1_1517	12_11517	ConsensusGBS0637-1		4904	MTP8	3H	83.6651	93.8091	3HL	3HL	923	7038
0101N16	3_0278	12_30278		ABC20753_1_334	10001	MTP4	3H	83.2334	95.1366	3HL	3HL	3445	54
0344N13	3_0278	12_30278		ABC20753_1_334	10001	MTP6	3H	83.2334	95.1366	3HL	3HL	5225	12098
0403A12	3_0278	12_30278		ABC20753_1_334	10001	MTP6	3H	83.2334	95.1366	3HL	3HL	5225	12098
0003A15	1_1138	12_11138	ABC06343-1-2-292		16658	MTP1	3H	85.9896	98.0545	3HL	3HL	6997	8110
0064I22	1_1138	12_11138	ABC06343-1-2-292		16658	MTP4	3H	85.9896	98.0545	3HL	3HL	820	7302
0100O08	1_0628	11_10628	42-512		15	MTP4	3H	87.2417	98.0545	3HL	3HL	4181	7575
0166J11	1_1138	12_11138	ABC06343-1-2-292		16658	MTP3	3H	85.9896	98.0545	3HL	3HL	6997	8110
0277L05	2_1348	11_21348	861-268		14179	MTP3	3H	87.2417	98.6601	3HL		1358	6240
0081G10	2_0136	11_20136	13081-199		22023	MTP1	3H	88.8249	100.287	3HL	3HL	3336	4558
0141P19	3_0663	12_30663		U32_6715_250	3947	MTP4	3H	89.3143	100.287	3HL	3HL	32	16257
0162D08	3_0663	12_30663		U32_6715_250	3947	MTP4	3H	89.3143	100.287	3HL	3HL	2847	19636
0257D12	3_1018	12_31018		SCRI_olad_217	15709	MTP5	3H	89.3143	100.287	3HL	3HL	8227	18769
0271A08	2_1294	11_21294	8020-87		3373	MTP3	3H	88.8249	100.287	3HL	3HL	2218	2623
0271A08	3_0663	12_30663		U32_6715_250	3947	MTP3	3H	89.3143	100.287	3HL	3HL	2218	2623
0591N04	2_1294	11_21294	8020-87		3373	MTP3	3H	88.8249	100.287	3HL	3HL	2218	2623
0550D21	1_0134	12_10134	1622-214		15032	MTP7	3H	89.3143	100.709	3HL	3HL	4714	8871
0586C20	3_0325	12_30325		U32_10917_237	5451	MTP7	3H	90.4801	101.37	3HL	3HL	4528	16777
0147A04	2_0659	11_20659	4019-302		2257	MTP4	3H	91.2501	102.116	3HL	3HL	5624	12518
0280I16	2_0659	11_20659	4019-302		2257	MTP3	3H	91.2501	102.116	3HL	3HL	3652	13274
0266J10	1_0253	11_10253	2236-773		1075	MTP3	3H	91.8834	102.661	3HL	3HL	10018	6408
0280I16	1_0583	12_10583	4019-573		2257	MTP3	3H	91.8834	102.661	3HL	3HL	3652	13274
0302D09	1_0253	11_10253	2236-773		1075	MTP3	3H	91.8834	102.661	3HL	3HL	10018	6408
0604F23	1_0747	11_10747	5224-1560		2725	MTP3	3H	93.4306	104.153	3HL	3HL	1618	17767
0752J22	3_1367	12_31367		U35_3071_1164	3071	MTP9	3H	95.3737	106.001	3HL	3HL	10026	19517
0806B04	3_0250	12_30250		ABC15559_1_489	7676	MTP9	3H	96.1509	106.668	3HL	3HL	156	10253
0810I11	3_0090	12_30090		ABC07895_1_382	17441	MTP9	3H	97.7125	107.995	3HL	3HL	1043	3688
0402K12	1_0074	12_10074	1291-538		546	MTP3	3H	98.4897	108.699	3HL	3HS	1761	1558
0402K12	2_0130	11_20130	1291-936		546	MTP3	3H	98.4897	108.699	3HL	3HL	1761	1558
0402K12	3_0909	12_30909		SCRI_abc01918_03_1	546	MTP3	3H	98.4897	108.699	3HL	3HL	1761	1558
0474A16	3_0640	12_30640		U32_6288_886	3564	MTP3	3H	98.4897	108.699	3HL	3HL	4398	16452
0621D19	3_0640	12_30640		U32_6288_886	3564	MTP3	3H	98.4897	108.699	3HL	3HL	4398	16452
0171H16	2_0626	11_20626	3787-1223		2118	MTP4	3H	99.1158	109.433	3HL	3HL	194	30
0336E19	1_0515	11_10515	3674-1352		16375	MTP3	3H	99.8858	110.093	3HL	3HL	3590	12057
0355L06	1_0515	11_10515	3674-1352		16375	MTP3	3H	99.8858	110.093	3HL	3HL	3590	17363
0118E05	2_1083	11_21083	6302-250		3889	MTP4	3H	101.433	111.494	3HL		735	12011
0164N04	2_1517	11_21517	ConsensusGBS0043-8		16921	MTP3	3H	102.98	113.048	3HL		5259	10168
0148D15	1_0662	12_10662	4528-2080		16760	MTP3	3H	104.535	114.363	3HL	3HL	7764
0279B08	2_1495	11_21495	ABC11028-1-1-64		18711	MTP3	3H	104.535	114.363	3HL	3HL	7764	19875
0279B08	1_0344	12_10344	2660-678		1463	MTP3	3H	104.535	114.363	3HL	3HL	7764	19875
0279B08	1_0662	12_10662	4528-2080		16760	MTP3	3H	104.535	114.363	3HL	3HL	7764	19875
0294A03	1_0344	12_10344	2660-678		1463	MTP5	3H	104.535	114.363	3HL	3HL	7764	19875
0294A03	1_0662	12_10662	4528-2080		16760	MTP5	3H	104.535	114.363	3HL	3HL	7764	19875
0407I10	3_0342	12_30342		U32_12072_133	21415	MTP6	3H	104.535	114.363	3HL	3HL	279	7049
0560A02	1_0344	12_10344	2660-678		1463	MTP7	3H	104.535	114.363	3HL	3HL	10476	19614
0016E15	2_1513	11_21513	ABC18746-1-2-109		23659	MTP1	3H	109.14	119.526	3HL	3HL	4031	3599
0063K18	2_1513	11_21513	ABC18746-1-2-109		23659	MTP4	3H	109.14	119.526	3HL	3HL	4843	7593
0087E21	2_1513	11_21513	ABC18746-1-2-109		23659	MTP4	3H	109.14	119.526	3HL	3HL	874	8007
0016E15	1_1392	12_11392	ABC18746-1-3-208		23659	MTP1	3H	111.422	120.725	3HL	3HL	4031	3599
0068A17	1_1392	12_11392	ABC18746-1-3-208		23659	MTP1	3H	111.422	120.725	3HL	3HL	6149	16987
0213D02	3_0423	12_30423		U32_2291_275	15449	MTP5	3H	111.422	120.725	3HL	3HL	2561	9295
0318M01	3_0423	12_30423		U32_2291_275	15449	MTP5	3H	111.422	120.725	3HL	3HL	9879	15072
0635J11	3_0423	12_30423		U32_2291_275	15449	MTP7	3H	111.422	120.725	3HL	3HL	3119	5085
0689P04	2_1081	12_21081	6295-131		2428	MTP3	3H	111.422	120.725	3HL	3HL	10289
0703B01	3_0423	12_30423		U32_2291_275	15449	MTP8	3H	111.422	120.725	3HL	3HL	2561	9295
0795O05	1_1392	12_11392	ABC18746-1-3-208		23659	MTP9	3H	111.422	120.725	3HL	3HL	5031	1512
0323O05	2_0168	11_20168	1435-670		563	MTP3	3H	113.998	124.041	3HL	3HL	1925	1971
0435J07	2_0168	11_20168	1435-670		563	MTP3	3H	113.998	124.041	3HL	3HL	1925	1971
0126O12	3_0276	12_30276		ABC20222_1_336	21628	MTP4	3H	113.998	125.111	3HL	3HL	1941	12559
0214M03	3_0375	12_30375		U32_14243_215	15067	MTP3	3H	114.775	125.111	3HL	3HL	1925	17869
0215F01	1_0312	11_10312	2500-1514		1363	MTP3	3H	113.998	125.111	3HL	3HL	7262	11680
0323O05	1_0100	12_10100	1435-495		563	MTP3	3H	113.998	125.111	3HL	3HL	1925	1971
0435J07	1_0100	12_10100	1435-495		563	MTP3	3H	113.998	125.111	3HL	3HL	1925	1971
0373B24	3_1329	12_31329		U35_22627_571	22627	MTP6	3H	115.545	125.858	3HL	3HL	9	3131
0016F01	1_0584	11_10584	4025-300		16147	MTP1	3H	117.1	127.265	3HL	3HL	10173	7480
0081L14	1_0584	11_10584	4025-300		16147	MTP1	3H	117.1	127.265	3HL	3HL	10173	7480
0099H03	1_0584	11_10584	4025-300		16147	MTP4	3H	117.1	127.265	3HL	3HL	3851	4172
0581K08	1_0584	11_10584	4025-300		16147	MTP3	3H	117.1	127.265	3HL	3HL	5252	19643
0182A13	3_0927	12_30927		SCRI_aj420778_01_1	14099	MTP3	3H	117.1	127.265	3HL		51	17738
0182A13	1_0680	12_10680	463-218		14100	MTP3	3H	117.87	128.011	3HL	3HL	51	17738
0335E02	1_1330	11_11330	ABC13753-1-2-167		6405	MTP3	3H	120.59	129.834	3HL	3HL	809	3371
0374K12	3_0223	12_30223		ABC14021_1_457	6485	MTP6	3H	120.59	129.834	3HL	3HL	4570	11641
0523K24	3_0223	12_30223		ABC14021_1_457	6485	MTP7	3H	120.59	129.834	3HL	3HL	2071	10949
0720F20	3_1220	12_31220		U35_18257_694	18257	MTP8	3H	120.59	129.834	3HL	3HL	3373	11730
0727F08	1_1330	11_11330	ABC13753-1-2-167		6405	MTP3	3H	120.59	129.834	3HL	3HL	809	3371
0033D11	2_0944	11_20944	5488-1097		2124	MTP1	3H	122.137	131.241	3HL	3HL	6308	19634
0698L10	3_1499	12_31499		U35_6448_287	6448	MTP8	3H	123.684	131.241	3HL	3HL	9849	14178
0717F12	3_0732	12_30732		U32_8112_835	4351	MTP8	3H	123.684	131.241	3HL	3HL	6786	19314
0437K03	2_1405	11_21405	9282-205		5772	MTP3	3H	123.684	132.617	3HL	3HL	10410	7075
0395O01	3_0274	12_30274		ABC19616_1_756	10272	MTP6	3H	124.843	133.364	3HL	3HL	6357	488
0545H14	3_0274	12_30274		ABC19616_1_756	10272	MTP3	3H	124.843	133.364	3HL	3HL	6357	488
0701P13	3_1525	12_31525		U35_835_1187	835	MTP8	3H	126.268	134.049	3HL	3HL	1508	3564
0714O09	3_1525	12_31525		U35_835_1187	835	MTP8	3H	126.268	134.049	3HL	3HL	1508	3564
0085F04	1_0821	11_10821	6069-304		17444	MTP1	3H	126.268	134.71	3HL	3HL	1596	13202
0092H01	1_0754	11_10754	5260-462		17434	MTP4	3H	126.268	134.71	3HL	3HL	627	19757
0096E23	1_0754	11_10754	5260-462		17434	MTP4	3H	126.268	134.71	3HL	3HL	5643	15110
0178E03	1_1338	12_11338	ABC14307-1-4-145		19991	MTP3	3H	126.268	134.71	3HL	3HL	756	5975
0178E03	1_1172	11_11172	ABC07496-pHv1343-02		16550	MTP3	3H	126.268	134.71	3HL	3HL	756	5975
0401G07	1_0821	11_10821	6069-304		17444	MTP3	3H	126.268	134.71	3HL	3HL	1596	13202
0438L18	1_0754	11_10754	5260-462		17434	MTP3	3H	126.268	134.71	3HL	3HL	5383	18288
0573H21	1_0754	11_10754	5260-462		17434	MTP3	3H	126.268	134.71	3HL	3HL	9157	3771
0628D21	1_1172	11_11172	ABC07496-pHv1343-02		16550	MTP3	3H	126.268	134.71	3HL	3HL	756	5975
0628D21	1_1338	12_11338	ABC14307-1-4-145		19991	MTP3	3H	126.268	134.71	3HL	3HL	756	5975
0701P13	3_0924	12_30924		SCRI_abc21044_01_1	23678	MTP8	3H	126.268	134.71	3HL	3HL	1508	3564
0714O09	3_0924	12_30924		SCRI_abc21044_01_1	23678	MTP8	3H	126.268	134.71	3HL	3HL	1508	3564
0078G03	2_0650	11_20650	3965-353		16531	MTP4	3H	127.095	135.431	3HL	3HL	1150	4036
0078G03	3_0096	12_30096		ABC08208_1_646	17687	MTP4	3H	127.095	135.431	3HL	3HL	1150	4036
0078G03	3_1238	12_31238		U35_18691_432	18691	MTP4	3H	127.095	135.431	3HL	3HL	1150	4036
0167C14	2_0413	12_20413	2779-2186		15255	MTP3	3H	127.095	135.431	3HL	3HL	9977	19545
0471G02	1_0867	11_10867	6716-823		3759	MTP3	3H	127.095	135.431	3HL	3HL	3997	19023
0171G22	1_0280	11_10280	2335-1614		15666	MTP3	3H	130.19	136.924	3HL	3HL
0171G22	2_0343	11_20343	2334-1827		15667	MTP3	3H	130.19	136.924	3HL	3HL
0445B06	1_0280	11_10280	2335-1614		15666	MTP3	3H	130.19	136.924	3HL	3HL		2625
0445B06	2_0343	11_20343	2334-1827		15667	MTP3	3H	130.19	136.924	3HL	3HL		2625
0243G18	1_1141	11_11141	ABC06381-1-5-73		2787	MTP3	3H	130.816	137.738	3HL	3HL	1127	6207
0383M05	3_0963	12_30963		SCRI_bbc11945_01_349	20899	MTP6	3H	130.816	137.738	3HL	3HL	554	527
0410G08	1_0188	12_10188	191-346		1529	MTP3	3H	130.816	137.738	3HL	3HL	1242	2625
0410G08	1_0505	12_10505	3635-400		2093	MTP3	3H	130.816	137.738	3HL	3HL	1242	2625
0450I11	1_0505	12_10505	3635-400		2093	MTP3	3H	130.816	137.738	3HL	3HL	1242	2625
0514K24	1_1141	11_11141	ABC06381-1-5-73		2787	MTP3	3H	130.816	137.738	3HL	3HL	1127	6207
0057M08	1_1196	11_11196	ABC08260-1-1-108		1520	MTP1	3H	130.816	138.392	3HL	3HL	1560	4531
0298F07	1_1196	11_11196	ABC08260-1-1-108		1520	MTP3	3H	130.816	138.392	3HL	3HL	1560	4531
0613J09	2_0369	12_20369	2481-903		15562	MTP3	3H	130.816	138.392	3HL	3HL	397	2819
0778C08	2_0369	12_20369	2481-903		15562	MTP3	3H	130.816	138.392	3HL	3HL	397	2819
0386K13	1_0842	11_10842	6402-691		3358	MTP3	3H	131.593	139.004	3HL	3HL	1641	17769
0425K01	1_0842	11_10842	6402-691		3358	MTP3	3H	131.593	139.004	3HL	3HL	1641	17769
0493K22	1_0205	12_10205	1987-480		940	MTP7			141.224	3HL	3HL	7027	18309
0185G04	1_0381	11_10381	2847-485		14408	MTP3	3H	136.659	143.329	3HL	3HL	1584	4247
0185G04	2_1428	11_21428	9618-372		4691	MTP3	3H	136.659	143.329	3HL	3HL	1584	4247
0290N03	3_0092	12_30092		ABC07973_1_264	17348	MTP5	3H	134.306	143.329	3HL	3HL	3496	6330
0358A05	1_0122	12_10122	1557-1313		14999	MTP6	3H	136.659	143.329	3HL	3HL	10128	2174
0358A05	1_0122	12_10122	1557-1313		14999	MTP3	3H	136.659	143.329	3HL	3HL	10128	2174
0442N12	3_0092	12_30092		ABC07973_1_264	17348	MTP6	3H	134.306	143.329	3HL	3HL	3496	6330
0164I05	1_1127	11_11127	ABC05919-1-2-157		16642	MTP4	3H	136.659	145.837	3HL	3HL	8607	13083
0402I07	2_0085	11_20085	11657-398		19903	MTP3	3H	137.278	146.253	3HL	3HL	5805	6060
0174J11	1_1154	12_11154	ABC06897-2-3-312		3050	MTP3	3H	138.825	147.568	3HL	3HL	2070	1856
0174J11	3_1251	12_31251		U35_19018_419	19018	MTP3	3H	138.825	147.568	3HL	3HL	2070	1856
0269A09	1_1154	12_11154	ABC06897-2-3-312		3050	MTP5	3H	138.825	147.568	3HL	3HL	5292	762
0393H20	1_1154	12_11154	ABC06897-2-3-312		3050	MTP6	3H	138.825	147.568	3HL	3HL	2070	1856
0402I07	1_1328	11_11328	ABC13678-1-2-369		4863	MTP3	3H	138.825	147.568	3HL	3HL	5805	6060
0599J10	1_1154	12_11154	ABC06897-2-3-312		3050	MTP7	3H	138.825	147.568	3HL	3HL	2070	1856
0599J10	3_1251	12_31251		U35_19018_419	19018	MTP7	3H	138.825	147.568	3HL	3HL	2070	1856
0803G01	1_1154	12_11154	ABC06897-2-3-312		3050	MTP3	3H	138.825	147.568	3HL	3HL	2070	1856
0803G01	3_1251	12_31251		U35_19018_419	19018	MTP3	3H	138.825	147.568	3HL	3HL	2070	1856
0813C06	1_1154	12_11154	ABC06897-2-3-312		3050	MTP9	3H	138.825	147.568	3HL	3HL	4187	13286
0174J11	3_1496	12_31496		U35_6407_219	6407	MTP3	3H	140.373	150.107	3HL	3HL	2070	1856
0592K03	2_1427	11_21427	9610-1195		19171	MTP3	3H	141.538	150.107	3HL	3HL	171	11137
0599J10	3_1496	12_31496		U35_6407_219	6407	MTP7	3H	140.373	150.107	3HL	3HL	2070	1856
0803G01	3_1496	12_31496		U35_6407_219	6407	MTP3	3H	140.373	150.107	3HL	3HL	2070	1856
0679M14	1_0570	11_10570	3949-1560		16694	MTP3	3H	142.316	150.107	3HL		3801	5125
0809B21	3_0137	12_30137		ABC10057_1_934	4001	MTP9	3H	142.316	151.844	3HL	3HL	5481	6878
0316H02	1_0631	11_10631	4270-184		2650	MTP3	3H	144.64	153.606	3HL		8652	13309
0539M08	1_0631	11_10631	4270-184		2650	MTP3	3H	144.64	153.606	3HL		1224	10121
0367D10	2_1386	12_21386	9040-492		19623	MTP6	3H	145.885	154.444	3HL	3HL	3571	14269
0047I05	2_0952	11_20952	5520-925		17198	MTP4			156.42	3HL	3HL	3738	5222
0104I13	2_1266	11_21266	7772-223		3055	MTP4	3H	148.893	156.42	3HL	3HL	2261	12587
0161P08	2_1272	11_21272	7818-967		4423	MTP4	3H	150.368	157.766	3HL	3HL	10408	8879
0237L13	2_1531	12_21531	ConsensusGBS0431-2		267	MTP3	3H	149.714	158.047	3HL	3HL	1975	16765
0219K13	2_1376	12_21376	8919-758		17264	MTP3	3H	151.218	159.54	3HL	3HL	1975	16765
0237L13	2_1376	12_21376	8919-758		17264	MTP3	3H	151.218	159.54	3HL	3HL	1975	16765
0237L13	3_0841	12_30841		OSU_Glb34_1_37_73	267	MTP3	3H	151.218	159.54	3HL	3HL	1975	16765
0389G03	3_1500	12_31500		U35_6520_551	6520	MTP6	3H	151.988	160.194	3HL	3HL	6161	7705
0397D05	3_1500	12_31500		U35_6520_551	6520	MTP6	3H	151.988	160.194	3HL	3HL	6161	7705
0362O03	2_0421	12_20421	2825-1609		1452	MTP6	3H	154.312	162.17	3HL	3HL	1949	6799
0430A17	2_0421	12_20421	2825-1609		1452	MTP6	3H	154.312	162.17	3HL	3HL	1949	6799
0341K05	2_0505	12_20505	3226-874		16221	MTP6	3H	155.089	162.831	3HL	3HL	2442	868
0321A12	3_0921	12_30921		SCRI_abc17007_02_1	23212	MTP6	3H	155.852	163.485	3HL	3HL	3079	12325
0814L20	3_0921	12_30921		SCRI_abc17007_02_1	23212	MTP9	3H	155.852	163.485	3HL	3HL	3079	12387
0412C14	3_0370	12_30370		U32_1392_2167	14846	MTP6	3H	155.852	164.146	3HL	3HL	6999	4239
0213O08	1_0646	11_10646	4403-885		2565	MTP3	3H	162.149	167.333	3HL	3HL	4771	17331
0213O08	2_0198	12_20198	15347-51		8966	MTP3	3H	162.149	167.333	3HL	3HL	4771	17331
0270B08	1_0646	11_10646	4403-885		2565	MTP3	3H	162.149	167.333	3HL	3HL	4771	17331
0451J13	3_0767	12_30767		U32_8797_283	4972	MTP7	3H	162.149	167.333	3HL	3HL	8301	4621
0680J20	3_0767	12_30767		U32_8797_283	4972	MTP8	3H	162.149	167.333	3HL	3HL	8301	4621
0031P01	1_1410	11_11410	ABC36454-pHv2499-01		40144	MTP1	3H	167.769	172.82	3HL	3HL	8566	6096
0058A08	1_0681	11_10681	4643-867		16666	MTP1	3H	167.769	172.82	3HL	3HL	9217	17051
0306E12	1_0893	11_10893	7169-713		3483	MTP3	3H	167.769	172.82	3HL	3HL	8073	17942
0306E12	3_1388	12_31388		U35_3483_585	3483	MTP3	3H	167.769	172.82	3HL	3HL	8073	17942
0375C11	1_1410	11_11410	ABC36454-pHv2499-01		40144	MTP3	3H	167.769	172.82	3HL	3HL	8566	6096
0413O08	1_0681	11_10681	4643-867		16666	MTP3	3H	167.769	172.82	3HL	3HL	9217	17051
0767M11	1_0681	11_10681	4643-867		16666	MTP3	3H	167.769	172.82	3HL	3HL	7686	17032
0159N07	1_1411	11_11411	ABC38781-pHv2346-01		14549	MTP4			173.426	3HL	3HL	8658	5956
0467P24	1_1411	11_11411	ABC38781-pHv2346-01		14549	MTP3			173.426	3HL	3HL	2433	1425
0498H06	1_1411	11_11411	ABC38781-pHv2346-01		14549	MTP3			173.426	3HL	3HL	2433	1425
0312K12	3_0736	12_30736		U32_8179_620	3355	MTP5	3H	168.395	173.426	3HL		5717	15867
0387C21	2_0057	11_20057	10982-896		20986	MTP3	3H	168.395	174.448	3HL	3HL	9780	4573
0546E18	2_0057	11_20057	10982-896		20986	MTP3	3H	168.395	174.448	3HL	3HL	2851	1798
0083J17	1_1516	11_11516	ConsensusGBS0632-3		21725	MTP4	3H	169.316	174.992	3HL	3HL	8278	8693
0496F04	2_0176	12_20176	14538-224		23269	MTP7	3H	170.094	175.696	3HL	3HL	2764	7533
0490I15	3_0229	12_30229		ABC14673_1_118	6814	MTP7	3H	170.094	177.011	3HL	3HL	8230	290
0735A04	3_0229	12_30229		ABC14673_1_118	6814	MTP8	3H	170.094	177.011	3HL	3HL	3477	1989
0269K01	2_1500	12_21500	ABC13480-1-2-87		19636	MTP3	3H	171.641	178.246	3HL	3HL	2245	5987
0403L08	2_1500	12_21500	ABC13480-1-2-87		19636	MTP6	3H	171.641	178.246	3HL	3HL	7323	6082
0078C24	3_0055	12_30055		ABC06491_2_376	16631	MTP4	3H	172.411	178.993	3HL	3HL	643	6203
0088J09	1_0767	11_10767	5399-139		3081	MTP1	3H	172.418	179.164	3HL	3HL	6912	13273
0809K23	1_0767	11_10767	5399-139		3081	MTP3	3H	172.418	179.164	3HL	3HL	6912	13273
0005H02	3_0135	12_30135		ABC09967_1_296	3927	MTP1	3H	173.174	179.813	3HL	3HL	3284	19538
0341F07	3_0135	12_30135		ABC09967_1_296	3927	MTP3	3H	173.174	179.813	3HL	3HL	3284	19538
0248E01	2_0145	11_20145	13301-90		7876	MTP3	4H	1.64272	1.19899	4HS	4HS	917	6765
0141P19	2_1056	11_21056	6133-774		17714	MTP4	4H	3.7429	2.59986	4HS	4HS	32	16257
0162D08	2_1056	11_21056	6133-774		17714	MTP4	4H	3.7429	2.59986	4HS	4HS	2847	19636
0762A21	1_0208	11_10208	1996-652		15198	MTP3	4H	3.7429	2.59986	4HS	4HS	3365	8865
0762A21	2_1056	11_21056	6133-774		17714	MTP3	4H	3.7429	2.59986	4HS	4HS	3365	8865
0163H03	1_0409	11_10409	3026-1011		15854	MTP3	4H	3.7429	3.19936	4HS		2767	16438
0386E11	1_0409	11_10409	3026-1011		15854	MTP3	4H	3.7429	3.19936	4HS		2767	16438
0171K02	2_1228	11_21228	7385-763		2585	MTP4	4H	3.7429	3.79886	4HS	4HS	2149	1870
0163H03	2_0274	12_20274	1962-972		13718	MTP3	4H	7.05605	6.86363	4HS	4HS	2767	16438
0360E09	1_1485	12_11485	ConsensusGBS0372-1		2803	MTP3	4H	11.2703	10.7665	4HS	4HS	963	1103
0351N24	3_1458	12_31458		U35_5192_464	5192	MTP6	4H	12.0189	12.3448	4HS	4HS	3010	15345
0585K24	3_1458	12_31458		U35_5192_464	5192	MTP7	4H	12.0189	12.3448	4HS	4HS	806	6702
0725K07	3_1458	12_31458		U35_5192_464	5192	MTP8	4H	12.0189	12.3448	4HS	4HS	806	6702
0730E20	1_0490	11_10490	3551-2537		15524	MTP3	4H	12.0189	12.3448	4HS	4HS	963	1171
0170N19	3_0540	12_30540		U32_4339_992	16604	MTP4	4H	15.7548	14.8773	4HS	4HS	4063	12381
0711H12	3_0540	12_30540		U32_4339_992	16604	MTP8	4H	15.7548	14.8773	4HS	4HS	2523	3676
0247B13	3_0150	12_30150		ABC10624_1_1026	18368	MTP5	4H	18.0075	16.9572	4HS	4HS	3202	1620
0071P03	1_0113	11_10113	1513-514		13670	MTP1	4H	19.5185	19.447	4HS	4HS	4023	13864
0172C19	1_0113	11_10113	1513-514		13670	MTP3	4H	19.5185	19.447	4HS	4HS	1850	7367
0214G16	1_0738	11_10738	5149-1645		15833	MTP3	4H	19.5185	19.447	4HS	4HS	1850	7367
0430K18	1_0738	11_10738	5149-1645		15833	MTP3	4H	19.5185	19.447	4HS	4HS	1850	7367
0673O14	1_0113	11_10113	1513-514		13670	MTP3	4H	19.5185	19.447	4HS	4HS	4023	13864
0064A11	1_0574	11_10574	3968-342		16008	MTP4	4H	20.1215	21.5268	4HS	4HS	8856	18658
0077D18	1_0221	11_10221	2055-947		15274	MTP1	4H	21.6118	22.9277	4HS	4HS	3664	6337
0376O20	1_0221	11_10221	2055-947		15274	MTP3	4H	21.6118	22.9277	4HS	4HS	3664	6337
0161J12	1_1199	11_11199	ABC08396-1-4-120		18059	MTP3	4H	22.3603	23.9615	4HS	4HS	8505	1889
0450A21	1_1136	11_11136	ABC06172-1-2-104		15631	MTP3	4H	23.102	24.7079	4HS	4HS	10117	540
0260G06	2_1458	12_21458	ABC01736-1-1-337		14194	MTP3	4H	23.8506	25.4542	4HS	4HS	1026	6214
0665F03	2_1458	12_21458	ABC01736-1-1-337		14194	MTP3	4H	23.8506	25.4542	4HS	4HS	1026	6214
0232A17	1_0626	12_10626	4243-2278		2006	MTP5	4H	24.5922	26.2005	4HS	4HS	5143	5301
0271O21	1_0562	12_10562	3897-578		16578	MTP3	4H	24.5922	26.2005	4HS	4HS	2953	13228
0365G24	3_0394	12_30394		U32_1684_474	764	MTP3	4H	24.5922	26.2005	4HS	4HS	794	4571
0365G24	1_1060	12_11060	ABC02346-1-1-66		620	MTP3	4H	24.5922	26.2005	4HS	4HS	794	4571
0449K17	1_0132	11_10132	1595-1107		618	MTP3	4H	24.5922	26.2005	4HS	4HS	794	4571
0638D05	1_0626	12_10626	4243-2278		2006	MTP7	4H	24.5922	26.2005	4HS	4HS	1423	18106
0051F09	2_0302	11_20302	2129-1928		15275	MTP1	4H	26.1933	27.999	4HS	4HS	1681	7505
0702N16	2_0680	11_20680	4098-758		744	MTP3	4H	26.1933	28.7453	4HS	4HS	5107	15353
0171F13	1_0031	11_10031	1094-801		15040	MTP4	4H	28.4044	30.3725	4HS	4HS	3050	8567
0171F13	3_0907	12_30907		SCRI_abc01648_02_1	530	MTP4	4H	28.4044	30.3725	4HS	4HS	3050	8567
0449K17	1_0395	12_10395	2929-1610		15853	MTP3	4H	24.5922	30.3725	4HS	4HS	794	4571
0738K10	3_0907	12_30907		SCRI_abc01648_02_1	530	MTP3	4H	28.4044	30.3725	4HS	4HS	2109	6063
0738K10	1_0031	11_10031	1094-801		15040	MTP3	4H	28.4044	30.3725	4HS	4HS	2109	6063
0803C09	1_0031	11_10031	1094-801		15040	MTP3	4H	28.4044	30.3725	4HS	4HS	2109	6063
0121F21	2_1389	11_21389	9081-753		19283	MTP2	4H	36.3685	34.3793	4HS	4HS	5279	2684
0252P20	2_1389	11_21389	9081-753		19283	MTP3	4H	36.3685	34.3793	4HS	4HS	159	10
0511E14	2_1389	11_21389	9081-753		19283	MTP3	4H	36.3685	34.3793	4HS	4HS	159	10
0752H20	3_0863	12_30863		OSU_HvPhyA_123	2724	MTP3	4H	33.3811	35.2419	4HS	4HS	1586	48
0752H20	3_0864	12_30864		OSU_HvPhyA_3050	2724	MTP3	4H	33.3811	35.2419	4HS	4HS	1586	48
0752H20	3_0865	12_30865		OSU_HvPhyA_345	2724	MTP3	4H	33.3811	35.2419	4HS	4HS	1586	48
0730M09	1_0860	12_10860	6603-1702		2691	MTP8	4H	36.3685	37.8784	4HS	4HS		19348
0752H20	1_0810	12_10810	5900-1872		17807	MTP3	4H	36.3685	37.8784	4HS	4HS	1586	48
0604N01	1_1382	12_11382	ABC17649-1-5-464		7417	MTP3	4H	37.8726	42.2217	4HS	4HS	10342	1977
0377B03	3_0992	12_30992		SCRI_olad_101	5055	MTP6	4H	38.6281	43.0598	4HS	4HS	3534	11613
0729O16	3_0992	12_30992		SCRI_olad_101	5055	MTP8	4H	38.6281	43.0598	4HS	4HS	3534	11613
0091I03	2_0012	11_20012	10255-529		5236	MTP4	4H	39.7579	43.7205	4HS	4HS	1688	10276
0111K18	1_0347	12_10347	2670-1431		13762	MTP2	4H	38.6281	43.7205	4HS	4HS	5595	14386
0152O10	2_0012	11_20012	10255-529		5236	MTP3	4H	39.7579	43.7205	4HS	4HS	5411	2701
0162M06	2_0012	11_20012	10255-529		5236	MTP3	4H	39.7579	43.7205	4HS	4HS	5411	2701
0239P20	1_0171	12_10171	1812-373		15066	MTP5	4H	38.6281	43.7205	4HS	4HS	4742	1168
0254N17	1_0347	12_10347	2670-1431		13762	MTP3	4H	38.6281	43.7205	4HS	4HS	5595	14386
0630P13	1_0171	12_10171	1812-373		15066	MTP7	4H	38.6281	43.7205	4HS	4HS	4742	1248
0634J14	1_0171	12_10171	1812-373		15066	MTP7	4H	38.6281	43.7205	4HS	4HS	4742	1168
0117N12	2_0180	11_20180	14765-388		8092	MTP2	4H	40.3609	44.9929	4HS	4HS	1311	2852
0329E13	1_0063	12_10063	1230-523		14717	MTP6	4H	40.3609	44.9929	4HS	4HS	3301	273
0654C20	2_0240	12_20240	1751-296		696	MTP3	4H	40.3609	44.9929	4HS	4HS	9798	7116
0258A21	3_0187	12_30187		ABC11855_1_206	4517	MTP5	4H	42.4541	46.9688	4HS	4HS	9998	3381
0746N14	3_0187	12_30187		ABC11855_1_206	4517	MTP8	4H	42.4541	46.9688	4HS	4HS	9998	3381
0452G01	1_1180	11_11180	ABC07631-1-1-83		2557	MTP3	4H	40.957	48.7673	4HS	4HS	5936	1883
0745K14	1_1180	11_11180	ABC07631-1-1-83		2557	MTP3	4H	40.957	48.7673	4HS	4HS	1477	624
0294N07	3_0993	12_30993		SCRI_olad_109	18373	MTP3	4H	43.7849	49.4341	4HS	4HS	1138	4490
0181E07	1_0793	11_10793	5726-414		17611	MTP4	4H	44.9355	50.2171	4HS	4HS	360	5160
0224I01	1_0793	11_10793	5726-414		17611	MTP3	4H	44.9355	50.2171	4HS	4HS	6616	17906
0310I10	1_0668	11_10668	4544-461		16672	MTP3	4H	44.9355	50.2171	4HS	4HS	9883	4475
0752C18	1_0668	11_10668	4544-461		16672	MTP3	4H	44.9355	50.2171	4HS	4HS	9883	4475
0052L18	2_0939	11_20939	5475-1355		17488	MTP1	4H	46.4119	51.5262	4HS	4HS	5254	13280
0053L15	2_0939	11_20939	5475-1355		17488	MTP4	4H	46.4119	51.5262	4HS	4HS	1451	3385
0370D20	2_0939	11_20939	5475-1355		17488	MTP3	4H	46.4119	51.5262	4HS	4HS	9962	12772
0672E24	1_1112	12_11112	ABC05345-1-1-75		1286	MTP8	4H	46.4119	51.5262	4HS	4HS	26	4642
0618C20	2_1490	11_21490	ABC09891-1-1-28		18704	MTP3	4H	46.4119	52.3887	4HS	4HS	9910	12622
0404E16	3_0564	12_30564		U32_4821_1059	16498	MTP6	4H	47.5972	53.2757	4HS	4HS	1481	12312
0001N10	1_0261	11_10261	2268-601		1128	MTP1	4H	48.5	53.9364	4HS	4HS	9795	508
0325E05	1_0261	11_10261	2268-601		1128	MTP3	4H	48.5	53.9364	4HS	4HS	9795	508
0435P16	3_1382	12_31382		U35_3372_1463	3372	MTP6	4H	48.5	53.9364	4HS	4HS	4670	12681
0753P15	3_1382	12_31382		U35_3372_1463	3372	MTP9	4H	48.5	53.9364	4HS	4HS	4670	12681
0176N06	1_0432	11_10432	3190-644		1787	MTP4	4H	48.5	54.7317	4HS	4HS	10466	10494
0374B21	1_0667	11_10667	454-1502		14571	MTP3	4H	48.5	54.7317	4HS	4HS	628	4539
0471I06	1_0667	11_10667	454-1502		14571	MTP3	4H	48.5	54.7317	4HS	4HS	628	4539
0592G11	1_0577	11_10577	3984-1920		15951	MTP3	4H	48.5	54.7317	4HS	4HS	7348	765
0597F12	2_0269	11_20269	1944-1901		15250	MTP3	4H	48.5	54.7317	4HS	4HS	465	6263
0253N02	2_1071	11_21071	6215-539		3338	MTP3	4H	48.5	54.9397	4HS	4HS	5537	17873
0271C13	3_0488	12_30488		U32_3424_95	15586	MTP5	4H	48.5	56.12	4HS	4HS	2502	12582
0374B21	3_0878	12_30878		OSU_PDI_995	14571	MTP3	4H	48.5	56.12	4HS	4HS	628	4539
0470J08	2_1029	12_21029	5950-378		17301	MTP3	4H	48.5	56.12	4HS	4HS	2388	17825
0471I06	3_0878	12_30878		OSU_PDI_995	14571	MTP3	4H	48.5	56.12	4HS	4HS	628	4539
0503K03	2_1442	12_21442	9723-836		4710	MTP7	4H	48.5	56.12	4HS	4HS	2372	5024
0576A08	2_1029	12_21029	5950-378		17301	MTP3	4H	48.5	56.12	4HS	4HS	2388	17825
0597F12	1_0195	12_10195	1944-1844		15250	MTP3	4H	48.5	56.12	4HS	4HS	465	6263
0650A09	2_1254	11_21254	7691-679		3855	MTP3			56.12	4HS	4HS	6655	2676
0656J23	3_1026	12_31026		UCI_Adh1_1279	42740	MTP3	4H	48.5	56.12	4HS	4HS	5840	4598
0691J14	2_1442	12_21442	9723-836		4710	MTP8	4H	48.5	56.12	4HS	4HS	2372	5024
0741H17	2_0156	12_20156	1385-227		14839	MTP8	4H	48.5	56.12	4HS	4HS	3750	3863
0474D04	1_0424	11_10424	3131-1029		15537	MTP3			56.2243	4HO		3724	18643
0031A04	2_0831	12_20831	4856-1785		16262	MTP4	4H	50.4	56.32	4HL	4HL	2811	7752
0114O05	2_0496	11_20496	3193-671		16117	MTP4	4H	51.2985	56.32	4HL	4HL	5371	666
0166L04	1_1190	12_11190	ABC08085-1-3-454		3427	MTP4	4H	50.4	56.32	4HL	4HL	6367	10384
0248G18	3_0605	12_30605		U32_5552_250	17791	MTP5	4H	50.4	56.32	4HL	4HL	3100	8250
0441M06	1_1063	12_11063	ABC02614-1-2-387		740	MTP3	4H	51.2985	56.32	4HL	4HL	7511	19583
0496M01	2_0525	12_20525	3328-1193		16122	MTP7	4H	50.4	56.32	4HL	4HL	6225	12631
0620O11	1_1063	12_11063	ABC02614-1-2-387		740	MTP7	4H	51.2985	56.32	4HL	4HL	7	1435
0625F17	3_0684	12_30684		U32_7104_420	2439	MTP7	4H	50.4	56.32	4HL	4HL	9756	12937
0764B19	2_0831	12_20831	4856-1785		16262	MTP9	4H	50.4	56.32	4HL	4HL	6432	12651
0401H15	3_0450	12_30450		U32_2718_537	15703	MTP6	4H	50.4	56.885	4HL	4HL	2684	7421
0429J23	3_0866	12_30866		OSU_HvPhyB_2292	5740	MTP6	4H	50.4	56.885	4HL	4HL	5601	110
0698M19	3_0866	12_30866		OSU_HvPhyB_2292	5740	MTP8	4H	50.4	56.885	4HL	4HL	5601	110
0793B24	3_0450	12_30450		U32_2718_537	15703	MTP9	4H	50.4	56.885	4HL	4HL	7528	12680
0124A08	2_0289	11_20289	2028-1571		923	MTP4	4H	50.4	58.2002	4HL	4HL	445	3126
0758E21	1_0607	12_10607	4143-1534		2275	MTP3	4H	50.4	58.2002	4HL	4HL	7332	14017
0473G19	1_1244	11_11244	ABC10254-1-2-250		18408	MTP3	4H	54.979	61.5647	4HL	4HL		6124
0785E06	1_1244	11_11244	ABC10254-1-2-250		18408	MTP3	4H	54.979	61.5647	4HL	4HL		6124
0021F09	3_1297	12_31297		U35_20464_428	20464	MTP4	4H	55.6305	62.8065	4HL	4HL	7051	2139
0085D01	1_0426	12_10426	3144-1501		1427	MTP1	4H	55.6305	62.8065	4HL	4HL	1726	17772
0090O24	3_0060	12_30060		ABC06641_1_79	16646	MTP1	4H	55.6305	62.8065	4HL	4HL	4334	4668
0198L24	1_0637	12_10637	4324-825		16885	MTP4	4H	55.6305	62.8065	4HL	4HL	7293	5296
0231J15	3_1462	12_31462		U35_5294_1121	5294	MTP5	4H	55.6305	62.8065	4HL	4HL	220	1089
0236F04	3_0995	12_30995		SCRI_olad_118	47497	MTP5	4H	55.6305	62.8065	4HL	4HL	4327	8064
0288N04	2_0898	12_20898	5220-496		3033	MTP5	4H	55.6305	62.8065	4HL	4HL	2294	14629
0297J24	2_1481	11_21481	ABC06247-1-1-122		16570	MTP3	4H	55.6305	62.8065	4HL	4HL	306	7264
0301M23	1_0046	11_10046	1169-944		14509	MTP3	4H	55.6305	62.8065	4HL	4HL	6896	2725
0365M09	2_0898	12_20898	5220-496		3033	MTP6	4H	55.6305	62.8065	4HL	4HL	2294	14629
0415E05	3_0995	12_30995		SCRI_olad_118	47497	MTP3	4H	55.6305	62.8065	4HL	4HL	505	491
0415H13	3_0839	12_30839		OSU_DTDP_237	47644	MTP3	4H	55.6305	62.8065	4HL	4HL	10285	13979
0435B24	2_1481	11_21481	ABC06247-1-1-122		16570	MTP3	4H	55.6305	62.8065	4HL	4HL	306	7264
0471H08	1_0426	12_10426	3144-1501		1427	MTP3	4H	55.6305	62.8065	4HL	4HL	1726	17772
0473B20	3_1462	12_31462		U35_5294_1121	5294	MTP7	4H	55.6305	62.8065	4HL	4HL	220	1089
0492C14	1_0637	12_10637	4324-825		16885	MTP3	4H	55.6305	62.8065	4HL	4HL	5258	13253
0556D04	3_1297	12_31297		U35_20464_428	20464	MTP7	4H	55.6305	62.8065	4HL	4HL	6239	19716
0702G16	3_0995	12_30995		SCRI_olad_118	47497	MTP8	4H	55.6305	62.8065	4HL	4HL	4327	8064
0090O24	2_0363	11_20363	245-433		158	MTP1	4H	55.6305	62.8065	4HL		4334	4668
0414M21	2_0363	11_20363	245-433		158	MTP3	4H	55.6305	62.8065	4HL		4334	4668
0089O20	2_0020	11_20020	10346-92		5418	MTP1	4H	55.6305	63.7914	4HL	4HL	5825	18291
0415H13	1_0088	12_10088	1366-1466		14654	MTP3	4H	55.6305	63.7914	4HL	4HL	10285	13979
0218P17	2_0450	11_20450	294-956		1227	MTP3			63.9994	4HL	4HL	6177	17884
0523D18	2_0450	11_20450	294-956		1227	MTP3			63.9994	4HL	4HL	6177	17884
0087G05	1_1108	12_11108	ABC05189-1-1-173		16170	MTP4	4H	55.6305	65.284	4HL	4HL	7187	14018
0125O23	1_1108	12_11108	ABC05189-1-1-173		16170	MTP4	4H	55.6305	65.284	4HL	4HL	477	8004
0321J20	1_0914	11_10914	7560-538		2677	MTP3			65.284	4HL	4HL	2894	17807
0551O20	1_0914	11_10914	7560-538		2677	MTP3			65.284	4HL	4HL	2894	17807
0692H21	1_0527	11_10527	3716-910		16171	MTP3	4H	55.6305	65.284	4HL	4HL	5185	17356
0796B01	1_0527	11_10527	3716-910		16171	MTP3	4H	55.6305	65.284	4HL	4HL	9895	19605
0273C13	1_0500	12_10500	3617-1123		16472	MTP5			69.1441	4HL	4HL	3985	1018
0293N16	1_1427	12_11427	ConsensusGBS0001-1		22298	MTP5	4H	62.8252	69.2419	4HL	4HL	3398	10137
0664I17	1_1427	12_11427	ConsensusGBS0001-1		22298	MTP8	4H	62.8252	69.2419	4HL	4HL	3398	10137
0257I11	2_1191	11_21191	7069-1149		18191	MTP3	4H	61.0439	70.7652	4HL	4HL	1564	15593
0359N22	3_0054	12_30054		ABC06435_1_76	17068	MTP6	4H	61.0439	70.7652	4HL	4HL	3786	1011
0059H22	2_0453	11_20453	2977-1925		15478	MTP4	4H	62.8252	71.7072	4HL	4HL	5437	19068
0201M03	2_1087	11_21087	6326-1032		18356	MTP3	4H	62.0974	71.7072	4HL	4HL	424	17746
0307C22	2_1273	11_21273	7822-1474		4320	MTP3	4H	62.8252	71.7072	4HL	4HL	5530	14444
0068L11	1_1207	11_11207	ABC08788-1-1-329		3274	MTP4	4H	62.8252	72.3618	4HL	4HL	5276	6861
0070N22	1_1207	11_11207	ABC08788-1-1-329		3274	MTP1	4H	62.8252	72.3618	4HL	4HL	6785	4606
0138N14	2_0062	11_20062	1110-715		14726	MTP2	4H	65.0501	73.6158	4HL	4HL	6144	2967
0605N13	2_0062	11_20062	1110-715		14726	MTP3	4H	65.0501	73.6158	4HL	4HL	6144	2967
0315J04	1_0639	11_10639	4336-2579		1741	MTP3	4H	65.0501	76.0933	4HL		986	17751
0110D08	1_0846	11_10846	6464-1115		17745	MTP4			76.3074	4HL	4HL	3316	1135
0112F17	1_0846	11_10846	6464-1115		17745	MTP2			76.3074	4HL	4HL	4164	16963
0565E21	1_0053	12_10053	1195-626		14628	MTP3	4H	65.0501	76.3074	4HL	4HL	4128	7510
0042P23	1_1070	11_11070	ABC03097-1-1-114		857	MTP1	4H	65.7987	77.0048	4HL	4HL		1926
0375F03	3_0455	12_30455		U32_2772_898	16218	MTP6	4H	65.7987	77.0048	4HL	4HL	1174	996
0559C11	3_0455	12_30455		U32_2772_898	16218	MTP7	4H	65.7987	77.0048	4HL	4HL	1174	996
0012A04	1_0010	11_10010	10321-364		20495	MTP1	4H	65.9997	77.6594	4HL	4HL	1414	2823
0012A04	3_0906	12_30906		SCRI_abc01646_02_1	529	MTP1	4H	65.9997	77.6594	4HL	4HL	1414	2823
0012F24	3_0906	12_30906		SCRI_abc01646_02_1	529	MTP4	4H	65.9997	77.6594	4HL	4HL	6311	1864
0012F24	1_0010	11_10010	10321-364		20495	MTP4	4H	65.9997	77.6594	4HL	4HL	6311	1864
0012F24	3_0905	12_30905		SCRI_abc01646_01_3	529	MTP4	4H	65.9997	77.6594	4HL	4HL	6311	1864
0225J09	3_1385	12_31385		U35_3389_293	3389	MTP5	4H	65.9997	77.6594	4HL	4HL	5662	7606
0335I14	3_1385	12_31385		U35_3389_293	3389	MTP6	4H	65.9997	77.6594	4HL	4HL	1701	10489
0348G02	3_0755	12_30755		U32_8515_734	17948	MTP6	4H	65.9997	77.6594	4HL	4HL	7238	12646
0378A21	3_1493	12_31493		U35_6233_449	6233	MTP6	4H	65.9997	77.6594	4HL	4HL	8189	1663
0669H13	3_1385	12_31385		U35_3389_293	3389	MTP8	4H	65.9997	77.6594	4HL	4HL	15	5152
0689O24	3_0906	12_30906		SCRI_abc01646_02_1	529	MTP8	4H	65.9997	77.6594	4HL	4HL	1414	2823
0689O24	3_0904	12_30904		SCRI_abc01646_01_1	529	MTP8	4H	65.9997	77.6594	4HL	4HL	1414	2823
0689O24	3_0905	12_30905		SCRI_abc01646_01_3	529	MTP8	4H	65.9997	77.6594	4HL	4HL	1414	2823
0720H21	3_1385	12_31385		U35_3389_293	3389	MTP8	4H	65.9997	77.6594	4HL	4HL	4527	5461
0726G23	3_0755	12_30755		U32_8515_734	17948	MTP8	4H	65.9997	77.6594	4HL	4HL	7238	12692
0156O10	2_0906	11_20906	5273-894		2411	MTP4	4H	65.0501	77.8674	4HL	4HL	3956	18960
0065G13	2_0072	11_20072	11293-490		6839	MTP4	4H	67.4622	78.0815	4HL	4HL	8303	18753
0147I15	1_1229	11_11229	ABC09662-1-3-352		17577	MTP4	4H	65.0501	78.0815	4HL	4HL	9317	12425
0473L16	1_1224	11_11224	ABC09432-1-1-160		4202	MTP3	4H	65.0501	78.5036	4HL	4HL	1565	3382
0194E21	1_0627	11_10627	424-423		98	MTP3	4H	68.2108	79.4701	4HL	4HL	2692	4507
0194E21	3_1536	12_31536		U35_98_423	98	MTP3	4H	68.2108	79.4701	4HL	4HL	2692	4507
0201H20	3_0693	12_30693		U32_7224_971	4436	MTP4	4H	68.2108	79.4701	4HL	4HL	4795	10010
0043E01	2_1504	11_21504	ABC14714-1-1-162		19093	MTP1	4H	69.507	80.7303	4HL	4HL	5303	12094
0310B15	1_1513	11_11513	ConsensusGBS0589-1		13822	MTP3	4H	69.507	80.7303	4HL	4HL	173	4470
0380G21	2_1504	11_21504	ABC14714-1-1-162		19093	MTP3	4H	69.507	80.7303	4HL	4HL	5303	12094
0288A11	2_0740	11_20740	4407-1344		2315	MTP3			82.8102	4HL	4HL	4928	17350
0508O20	2_0740	11_20740	4407-1344		2315	MTP3			82.8102	4HL	4HL	4928	17350
0096D14	1_0829	11_10829	6172-773		3335	MTP4	4H	73.839	83.7461	4HL	4HL	10142	2818
0403C04	1_0829	11_10829	6172-773		3335	MTP3	4H	73.839	83.7461	4HL	4HL	1576	17785
0795H11	3_1258	12_31258		U35_19317_1010	19317	MTP9	4H	73.5687	83.7461	4HL	4HL	2247	8645
0795H11	3_1362	12_31362		U35_2917_591	2917	MTP9	4H	73.5687	83.7461	4HL	4HL	2247	8645
0151G22	1_0309	11_10309	2490-1786		1311	MTP3	4H	76.0293	85.0736	4HL	4HL	4233	2885
0024E23	1_0090	11_10090	1375-2534		14849	MTP1	4H	76.0293	86.0095	4HL	4HL	7601	19454
0233C24	2_0143	12_20143	13226-182		22089	MTP5	4H	76.0293	86.0095	4HL	4HL	4311	12346
0468P20	1_0090	11_10090	1375-2534		14849	MTP3	4H	76.0293	86.0095	4HL	4HL	10043	1801
0561L12	3_1231	12_31231		U35_18452_966	18452	MTP7	4H	77.3116	86.0095	4HL	4HL	3445	54
0590G08	3_0136	12_30136		ABC09988_1_744	18806	MTP7	4H	77.3116	86.0095	4HL	4HL	488	9649
0728A18	3_0136	12_30136		ABC09988_1_744	18806	MTP8	4H	77.3116	86.0095	4HL	4HL	488	9649
0191I15	2_1332	11_21332	8463-466		18111	MTP4	4H	77.3116	87.0128	4HL	4HL	9605	1113
0248D06	1_0523	11_10523	3704-1947		2866	MTP3	4H	78.7672	88.3035	4HL	4HL	1690	12567
0403F15	3_1148	12_31148		U35_16572_1349	16572	MTP6	4H	78.7672	88.3035	4HL	4HL	4082	1480
0709O15	3_1148	12_31148		U35_16572_1349	16572	MTP8	4H	78.7672	88.3035	4HL	4HL	2252	14270
0720D03	3_1148	12_31148		U35_16572_1349	16572	MTP8	4H	78.7672	88.3035	4HL	4HL	2252	14270
0155P02	1_0170	12_10170	1810-2553		808	MTP4	4H	79.5781	88.7011	4HL	4HL	5085	16526
0248D06	1_0170	12_10170	1810-2553		808	MTP3	4H	79.5781	88.7011	4HL	4HL	1690	12567
0430K16	3_0226	12_30226		ABC14289_1_335	4788	MTP6	4H	79.5781	89.3557	4HL	4HL	8870	14333
0455N21	1_1500	11_11500	ConsensusGBS0461-3		15225	MTP3	4H	79.5781	89.3557	4HL	4HL	775	514
0539H01	1_1500	11_11500	ConsensusGBS0461-3		15225	MTP3	4H	79.5781	89.3557	4HL	4HL	775	514
0594L09	3_0226	12_30226		ABC14289_1_335	4788	MTP7	4H	79.5781	89.3557	4HL	4HL	2565	8838
0061L02	1_1526	12_11526	ConsensusGBS0666-1		15181	MTP4	4H	80.9505	90.102	4HL	4HL	6092	18919
0172K04	1_0724	11_10724	4988-858		17216	MTP3	4H	82.4199	91.4233	4HL	4HL	8458	13335
0584E11	1_0724	11_10724	4988-858		17216	MTP3	4H	82.4199	91.4233	4HL	4HL	8458	13335
0650O01	3_1246	12_31246		U35_18847_967	18847	MTP8	4H	83.5497	92.4144	4HL	4HL	2910	5034
0597C09	1_0723	11_10723	4986-1214		16936	MTP3	4H	84.2983	93.075	4HL	4HL	4203	1197
0597C09	2_0689	11_20689	4133-601		16825	MTP3	4H	84.2983	93.075	4HL	4HL	4203	1197
0733I03	3_0390	12_30390		U32_1550_1487	14967	MTP8	4H	84.2983	93.075	4HL	4HL	2910	5034
0373L13	1_0670	12_10670	4555-499		16787	MTP3	4H	85.04	94.0721	4HL	4HL	9521	17970
0554B06	1_0670	12_10670	4555-499		16787	MTP3	4H	85.04	94.0721	4HL	4HL	9521	17970
0048H09	1_1213	11_11213	ABC09154-1-1-250		18324	MTP1	4H	86.2668	95.2161	4HL	4HL	3524	219
0695C11	1_1213	11_11213	ABC09154-1-1-250		18324	MTP3	4H	86.2668	95.2161	4HL	4HL	3524	219
0345B13	1_0022	12_10022	10654-1181		19703	MTP3			95.2711	4HL	4HL	9707	11109
0017I12	1_0588	11_10588	4039-1686		2352	MTP1	4H	89.3928	97.5223	4HL	4HL	3149	6336
0721K21	1_0588	11_10588	4039-1686		2352	MTP3	4H	89.3928	97.5223	4HL	4HL	3149	6336
0455K02	3_0138	12_30138		ABC10112_1_287	17827	MTP7	4H	90.287	98.703	4HL	4HL	934	5716
0164M11	2_0732	11_20732	4361-1867		2510	MTP4	4H	92.3802	100.226	4HL	4HL	3335	6781
0596E15	3_0142	12_30142		ABC10311_1_272	18428	MTP7	4H	93.1288	100.972	4HL	4HL	79	8501
0670A07	3_0142	12_30142		ABC10311_1_272	18428	MTP8	4H	93.1288	100.972	4HL	4HL	5621	14259
0031O14	1_0785	11_10785	5611-811		18206	MTP1	4H	93.8704	102.93	4HL	4HL	1654	1109
0186J10	1_0785	11_10785	5611-811		18206	MTP3	4H	93.8704	102.93	4HL	4HL	1654	1109
0362N16	1_0824	12_10824	6136-531		3248	MTP3	4H	96.5875	102.93	4HL	4HL	1260	17761
0471I24	1_0824	12_10824	6136-531		3248	MTP3	4H	96.5875	102.93	4HL	4HL	1260	17761
0735E17	1_0271	12_10271	2299-2992		15479	MTP8	4H	96.5875	102.93	4HL	4HL	8960	18350
0206M21	3_0584	12_30584		U32_5144_1710	2513	MTP5	4H	96.5875	105.169	4HL	4HL	3043	5421
0279B09	3_0584	12_30584		U32_5144_1710	2513	MTP5	4H	96.5875	105.169	4HL	4HL	3043	5421
0104O14	3_0046	12_30046		ABC06018_60	2255	MTP4	4H	96.5875	105.83	4HL	4HL	1886	10637
0794J07	2_0838	11_20838	4919-1051		1837	MTP3	4H	96.5875	107.145	4HL	4HL	768	947
0529A23	3_0117	12_30117		ABC09226_2_496	4275	MTP3	4H	96.5875	108.338	4HL		4155	2415
0454H20	2_0762	11_20762	4535-1366		2359	MTP3	4H	98.5491	108.998	4HL	4HL	3864	18642
0072M24	3_0158	12_30158		ABC10937_1_696	4011	MTP4	4H	100.739	109.647	4HL	4HL	328	12744
0361L11	1_1292	11_11292	ABC12093-1-2-231		19655	MTP3	4H	96.5875	109.647	4HL	4HL	2791	6045
0454H20	1_0666	12_10666	4535-1140		2359	MTP3	4H	98.5491	109.647	4HL	4HL	3864	18642
0616I10	1_0666	12_10666	4535-1140		2359	MTP7	4H	98.5491	109.647	4HL	4HL	2266	9994
0087I05	2_0454	11_20454	299-163		435	MTP4	4H	101.62	111.133	4HL	4HL	1861	10530
0288G23	2_0454	11_20454	299-163		435	MTP3	4H	101.62	111.133	4HL	4HL	1429	12590
0195P20	3_0539	12_30539		U32_4329_198	2490	MTP4	4H	100.739	111.806	4HL	4HL	4600	5558
0588O17	1_0614	11_10614	41-695		476	MTP3	4H	100.739	111.806	4HL	4HL	1338	17271
0588O17	3_0987	12_30987		SCRI_mlo_10267	16561	MTP3	4H	100.739	111.806	4HL	4HL	1338	17271
0588O17	3_0988	12_30988		SCRI_mlo_10517	16561	MTP3	4H	100.739	111.806	4HL	4HL	1338	17271
0588O17	1_1139	12_11139	ABC06351-1-2-130		16561	MTP3	4H	103.11	111.806	4HL	4HL	1338	17271
0588O17	3_0990	12_30990		SCRI_mlo_11679	16561	MTP3	4H	103.11	111.806	4HL	4HL	1338	17271
0611F15	1_0614	11_10614	41-695		476	MTP3	4H	100.739	111.806	4HL	4HL	1338	17271
0611F15	1_1139	12_11139	ABC06351-1-2-130		16561	MTP3	4H	103.11	111.806	4HL	4HL	1338	17271
0602O08	3_1139	12_31139		U35_16371_1353	16371	MTP7	4H	103.11	114.608	4HL	4HL	3073	14409
0156G16	1_1194	12_11194	ABC08246-1-1-278		17258	MTP4	4H	107.116	117.605	4HL	4HL	4915	16354
0557K10	3_0385	12_30385		U32_1510_670	1410	MTP3	4H	107.865	118.309	4HL	4HL	945	12532
0234D13	3_1138	12_31138		U35_16370_944	16370	MTP5	4H	111.074	118.951	4HL	4HL	6312	3684
0045C17	1_0123	11_10123	1561-1053		14519	MTP4	4H	108.696	130.813	4HL	4HL	544	7276
0553L21	1_1233	12_11233	ABC09877-1-1-108		17896	MTP7	4H	111.663	130.813	4HL	4HL	6259	16853
0792H20	3_0006	12_30006		ABC01616_1_514	14468	MTP9	4H	119.835	130.813	4HL	4HL	9304	12191
0742I17	1_0712	11_10712	4861-640		17382	MTP3	4H	111.663	132.776	4HL	4HL	7279	17017
0804J13	2_0701	11_20701	4170-1094		16817	MTP3	4H	113.167	133.523	4HL	4HL	5591	17018
0804J13	1_1235	12_11235	ABC09920-1-2-184		18129	MTP3	4H	113.167	133.523	4HL	4HL	5591	17018
0066M14	2_1035	11_21035	6019-296		17725	MTP1	4H	113.916	134.55	4HL	4HL	1820	16908
0066M14	1_1066	11_11066	ABC02813-1-4-326		2223	MTP1	4H	113.916	134.55	4HL	4HL	1820	16908
0488M12	2_1035	11_21035	6019-296		17725	MTP3	4H	113.916	134.55	4HL	4HL	1820	16908
0488M12	1_1066	11_11066	ABC02813-1-4-326		2223	MTP3	4H	113.916	134.55	4HL	4HL	1820	16908
0197M24	3_0146	12_30146		ABC10456_1_428	19229	MTP4	4H	114.657	135.584	4HL	4HL	3500	19527
0071H04	2_1130	11_21130	6689-135		18219	MTP4	4H	116.855	137.211	4HL	4HL	3111	5207
0670C02	2_0760	12_20760	4531-427		17106	MTP8	4H	118.345	138.704	4HL	4HL	10102	11335
0047K17	1_0269	11_10269	2297-1250		1206	MTP1	4H	117.596	138.704	4HL		608	19629
0049F08	1_0269	11_10269	2297-1250		1206	MTP1	4H	117.596	138.704	4HL		608	19629
0148F17	1_0269	11_10269	2297-1250		1206	MTP4	4H	117.596	138.704	4HL		301	10219
0655C16	2_0224	11_20224	1659-301		554	MTP3	4H	117.596	138.704	4HL		326	2598
0044A02	2_0007	11_20007	1010-1268		14333	MTP4	4H	119.086	139.316	4HL	4HL	2576	19704
0067G11	2_0007	11_20007	1010-1268		14333	MTP4	4H	119.086	139.316	4HL	4HL	1856	5019
0382K08	2_1450	12_21450	985-2172		14423	MTP3	4H	119.086	139.316	4HL	4HL	825	13353
0382K08	2_0007	11_20007	1010-1268		14333	MTP3	4H	119.086	139.316	4HL	4HL	825	13353
0787I03	2_1450	12_21450	985-2172		14423	MTP9	4H	119.086	139.316	4HL	4HL	825	1205
0060D03	3_0425	12_30425		U32_2366_688	867	MTP1	4H	119.086	139.97	4HL	4HL	10102	11335
0095I21	3_0476	12_30476		U32_3160_644	15591	MTP4	4H	119.086	139.97	4HL	4HL	6517	13994
0095I21	1_0610	11_10610	4152-573		14974	MTP4	4H	119.086	139.97	4HL	4HL	6517	13994
0110M20	1_0610	11_10610	4152-573		14974	MTP2	4H	119.086	139.97	4HL	4HL	417	1139
0375E23	3_0476	12_30476		U32_3160_644	15591	MTP3	4H	119.086	139.97	4HL	4HL	417	1139
0670C02	3_0425	12_30425		U32_2366_688	867	MTP8	4H	119.086	139.97	4HL	4HL	10102	11335
0340H22	3_0873	12_30873		OSU_HvSNF2_212	47118	MTP3	4H	119.086	142.601	4HL	4HL	1281	13537
0149F13	3_1422	12_31422		U35_4290_1313	4290	MTP4	4H	120.577	144.093	4HL	4HL	10274	19591
0108M01	1_1186	11_11186	ABC08009-1-2-304		4666	MTP4	4H	121.831	144.399	4HL	4HL	4996	1158
0806B08	2_0013	11_20013	10273-543		20344	MTP3	4H	123.294	146.479	4HL	4HL	3185	11001
0410G11	3_0163	12_30163		ABC11063_1_46	4182	MTP6	5H	0	0	5HS	5HS	3265	10664
0057E04	2_0894	11_20894	5206-787		2783	MTP1	5H	2.0945	1.26017	5HS	5HS	5414	3432
0062E03	2_0894	11_20894	5206-787		2783	MTP1	5H	2.0945	1.26017	5HS	5HS	7717	17933
0077K15	2_0894	11_20894	5206-787		2783	MTP1	5H	2.0945	1.26017	5HS	5HS	9172	17958
0097I24	2_0894	11_20894	5206-787		2783	MTP4	5H	2.0945	1.26017	5HS	5HS	9109	19177
0503P03	2_0894	11_20894	5206-787		2783	MTP3	5H	2.0945	1.26017	5HS	5HS	9172	17958
0116A09	3_0976	12_30976		SCRI_gsp_0434	1159	MTP4	5H	2.0945	1.91472	5HS	5HS	2840	5226
0127B07	3_0543	12_30543		U32_4362_135	16960	MTP4	5H	2.80824	1.91472	5HS	5HS	2605	5031
0402J15	3_0980	12_30980		SCRI_hina_1231	73	MTP6	5H	2.0945	1.91472	5HS	5HS	3692	13237
0549O14	3_0543	12_30543		U32_4362_135	16960	MTP7	5H	2.80824	1.91472	5HS	5HS	7921	19056
0621G18	3_0980	12_30980		SCRI_hina_1231	73	MTP7	5H	2.0945	1.91472	5HS	5HS	562	11130
0621G18	3_0976	12_30976		SCRI_gsp_0434	1159	MTP7	5H	2.0945	1.91472	5HS	5HS	562	11130
0641K21	3_0976	12_30976		SCRI_gsp_0434	1159	MTP8	5H	2.0945	1.91472	5HS	5HS	562	11129
0641K21	3_0980	12_30980		SCRI_hina_1231	73	MTP8	5H	2.0945	1.91472	5HS	5HS	562	11129
0116A09	3_1023	12_31023		SCRI_pg_0509	24189	MTP4	5H	4.96277	4.15366	5HS	5HS	2840	5226
0116A09	3_0977	12_30977		SCRI_gsp_0998	1159	MTP4	5H	6.40358	4.15366	5HS	5HS	2840	5226
0621G18	3_0975	12_30975		SCRI_gsp_0137	1159	MTP7	5H	4.96277	4.15366	5HS	5HS	562	11130
0621G18	3_0979	12_30979		SCRI_hina_1061	73	MTP7	5H	5.67651	4.15366	5HS	5HS	562	11130
0621G18	3_0977	12_30977		SCRI_gsp_0998	1159	MTP7	5H	6.40358	4.15366	5HS	5HS	562	11130
0641K21	3_0975	12_30975		SCRI_gsp_0137	1159	MTP8	5H	4.96277	4.15366	5HS	5HS	562	11129
0641K21	3_0979	12_30979		SCRI_hina_1061	73	MTP8	5H	5.67651	4.15366	5HS	5HS	562	11129
0641K21	3_0977	12_30977		SCRI_gsp_0998	1159	MTP8	5H	6.40358	4.15366	5HS	5HS	562	11129
0778D09	3_0001	12_30001		ABC00388_1_523	14204	MTP3	5H	5.67651	4.15366	5HS	5HS	10088	19785
0504D05	2_1221	11_21221	7310-996		4141	MTP3	5H	9.33188	6.36201	5HS	5HS	1640	12797
0654E04	3_0591	12_30591		U32_5299_1659	16749	MTP8	5H	5.67651	6.36201	5HS	5HS	10068	19784
0072O18	2_0206	11_20206	1582-63		14644	MTP1	5H	6.40358	7.26126	5HS	5HS	1640	12797
0504D05	2_0206	11_20206	1582-63		14644	MTP3	5H	6.40358	7.26126	5HS	5HS	1640	12797
0062E24	1_1381	11_11381	ABC17471-1-3-78		7624	MTP4	5H	7.48418	8.25226	5HS	5HS	6488	5288
0271N22	3_1094	12_31094		U35_14446_578	14446	MTP5	5H	18.0901	11.4455	5HS	5HS	316	8421
0431O07	3_0714	12_30714		U32_7632_376	3991	MTP6	5H	19.4375	13.8251	5HS	5HS	3506	10690
0582G04	3_0167	12_30167		ABC11259_1_564	18437	MTP7	5H	26.2814	20.4808	5HS	5HS	7990	8919
0163E15	2_0873	11_20873	5086-1239		2549	MTP3	5H	26.2814	21.1415	5HS	5HS	3528	8117
0475H03	2_0873	11_20873	5086-1239		2549	MTP3	5H	26.2814	21.1415	5HS	5HS	3528	4584
0163E15	2_1426	11_21426	9608-371		4027	MTP3	5H	27.0018	21.6798	5HS	5HS	3528	8117
0163E15	1_0974	11_10974	847-1396		14706	MTP3	5H	27.0018	21.6798	5HS	5HS	3528	8117
0475H03	2_1426	11_21426	9608-371		4027	MTP3	5H	27.0018	21.6798	5HS	5HS	3528	4584
0475H03	1_0974	11_10974	847-1396		14706	MTP3	5H	27.0018	21.6798	5HS	5HS	3528	4584
0107E22	3_0531	12_30531		U32_4156_2652	16728	MTP4	5H	27.7222	22.7075	5HS	5HS	7358	18948
0659G12	3_0531	12_30531		U32_4156_2652	16728	MTP8	5H	27.7222	22.7075	5HS	5HS	3605	4853
0082I01	2_1324	11_21324	8377-1022		5168	MTP4	5H	30.9907	25.4175	5HS	5HS	675	3815
0317A03	2_0576	12_20576	3522-2500		16374	MTP5	5H	29.9701	25.4909	5HS	5HS	771	7312
0198H19	1_0530	12_10530	3726-1989		1947	MTP3	5H	33.0852	27.9133	5HS	5HS	10238	769
0054L11	1_0688	11_10688	4684-775		16708	MTP1	5H	34.2525	28.9839	5HS	5HS	72	17
0317A03	1_0499	12_10499	3611-635		16140	MTP5	5H	34.2525	28.9839	5HS	5HS	771	7312
0610P17	3_0410	12_30410		U32_2073_1148	15214	MTP7	5H	37.1074	31.2044	5HS	5HS	7096	9839
0122C17	2_0845	11_20845	4977-567		16904	MTP4	5H	39.969	33.5535	5HS	5HS	3415	8975
0122C17	2_0980	11_20980	5732-1104		3527	MTP4	5H	39.969	33.5535	5HS	5HS	3415	8975
0471H24	2_1391	11_21391	9100-978		19014	MTP3	5H	39.969	33.5535	5HS	5HS	1285	10798
0385H10	1_1318	12_11318	ABC13318-1-2-78		1977	MTP3	5H	40.9162	34.6852	5HS	5HS	252	16725
0596O18	1_1318	12_11318	ABC13318-1-2-78		1977	MTP3	5H	40.9162	34.6852	5HS	5HS	252	16725
0505A14	1_0864	12_10864	6672-803		3781	MTP3	5H	41.6366	35.3887	5HS	5HS	1658	5387
0505A14	3_0838	12_30838		OSU_Contig8860_at_167	3781	MTP3			35.3887	5HS	5HS	1658	5387
0235D17	2_0770	12_20770	4586-536		2593	MTP5	5H	42.317	35.8842	5HS	5HS	2408	10638
0622L03	2_0770	12_20770	4586-536		2593	MTP7	5H	42.317	35.8842	5HS	5HS	2408	10638
0062K01	2_1253	11_21253	7681-229		4046	MTP4	5H	43.1374	36.7223	5HS	5HS	6874	17159
0139I21	3_0707	12_30707		U32_7514_744	3589	MTP4	5H	43.1374	36.7223	5HS	5HS	7660	6583
0111D02	2_0729	11_20729	4334-482		16998	MTP4	5H	44.1247	37.23	5HS	5HS	9347	19431
0038E15	2_0987	11_20987	5754-850		3197	MTP4	5H	46.2325	38.7777	5HS	5HS	2188	4802
0081J11	1_0260	11_10260	2267-1173		15470	MTP1	5H	46.2325	38.7777	5HS	5HS	8574	10823
0138H01	3_1312	12_31312		U35_21417_466	21417	MTP4	5H	46.2325	38.7777	5HS	5HS	267	4143
0170B13	3_0105	12_30105		ABC08682_1_180	3843	MTP4	5H	47.3932	38.7777	5HS	5HS	585	1299
0635P08	3_0654	12_30654		U32_6548_1115	18263	MTP7	5H	46.2325	38.7777	5HS	5HS	1266	14585
0733P06	3_0654	12_30654		U32_6548_1115	18263	MTP8	5H	46.2325	38.7777	5HS	5HS	3663	4993
0751E02	1_0955	11_10955	8118-1005		18817	MTP3	5H	46.2325	38.7777	5HS	5HS	4296	2705
0797D10	1_1432	11_11432	ConsensusGBS0019-1		17182	MTP3	5H	47.3932	38.7777	5HS	5HS	6023	707
0797D10	3_1492	12_31492		U35_623_856	623	MTP3	5H	47.3932	38.7777	5HS	5HS	6023	707
0043E20	2_1372	12_21372	8865-547		19130	MTP4	5H	48.1136	39.4751	5HS	5HS	9780	19789
0226L11	2_1372	12_21372	8865-547		19130	MTP5	5H	48.1136	39.4751	5HS	5HS	285	8803
0226L11	3_1257	12_31257		U35_19217_393	19217	MTP5	5H	48.1136	39.4751	5HS	5HS	285	8803
0690F06	2_1372	12_21372	8865-547		19130	MTP8	5H	48.1136	39.4751	5HS	5HS	1548	10636
0091G06	1_0923	12_10923	7679-530		16300	MTP4	5H	48.8273	40.1357	5HS	5HS	2963	8563
0096P22	1_0923	12_10923	7679-530		16300	MTP1	5H	48.8273	40.1357	5HS	5HS	1832	17779
0191E10	3_1155	12_31155		U35_16881_1495	16881	MTP4	5H	48.8273	40.1357	5HS	5HS		16611
0318G10	3_1155	12_31155		U35_16881_1495	16881	MTP5	5H	48.8273	40.1357	5HS	5HS	631	589
0369M17	2_1401	11_21401	9209-298		16300	MTP3	5H	48.8273	40.1357	5HS	5HS	9940	19557
0369M17	1_0923	12_10923	7679-530		16300	MTP3	5H	48.8273	40.1357	5HS	5HS	9940	19557
0748M19	1_1198	11_11198	ABC08327-1-1-353		15990	MTP3	5H	48.8273	40.1357	5HS	5HS	9940	19557
0748M19	2_1401	11_21401	9209-298		16300	MTP3	5H	48.8273	40.1357	5HS	5HS	9940	19557
0748M19	1_0923	12_10923	7679-530		16300	MTP3	5H	48.8273	40.1357	5HS	5HS	9940	19557
0043J11	2_0101	11_20101	12005-188		6930	MTP4	5H	50.2681	41.451	5HS	5HS	4703	17364
0227P16	3_1390	12_31390		U35_3506_1313	3506	MTP5	5H	50.2681	41.451	5HS	5HS	1121	12769
0261D13	3_1512	12_31512		U35_7199_521	7199	MTP5	5H	50.2681	41.451	5HS	5HS	7338	9353
0282F03	3_0354	12_30354		U32_12553_70	19797	MTP5	5H	50.2681	41.451	5HS	5HS	7248	14307
0356J21	3_1512	12_31512		U35_7199_521	7199	MTP6	5H	50.2681	41.451	5HS	5HS	3725	9274
0369I22	3_0729	12_30729		U32_8054_311	18482	MTP6	5H	50.2681	41.451	5HS	5HS	2399	12872
0436E21	3_1423	12_31423		U35_4321_768	4321	MTP6	5H	50.2681	41.451	5HS	5HS	1661	523
0581B08	3_1423	12_31423		U35_4321_768	4321	MTP3	5H	50.2681	41.451	5HS	5HS	2167	17840
0605A11	3_1423	12_31423		U35_4321_768	4321	MTP7	5H	50.2681	41.451	5HS	5HS	10342	14854
0605C18	3_1423	12_31423		U35_4321_768	4321	MTP7	5H	50.2681	41.451	5HS	5HS	8618	15652
0620G10	3_0729	12_30729		U32_8054_311	18482	MTP7	5H	50.2681	41.451	5HS	5HS	4747	19649
0694A17	3_0729	12_30729		U32_8054_311	18482	MTP3	5H	50.2681	41.451	5HS	5HS	10405	19828
0719K08	3_1423	12_31423		U35_4321_768	4321	MTP3	5H	50.2681	41.451	5HS	5HS	2167	17840
0727E17	3_1423	12_31423		U35_4321_768	4321	MTP8	5H	50.2681	41.451	5HS	5HS	1661	523
0113O19	3_1520	12_31520		U35_7709_655	7709	MTP4	5H	51.2953	42.31	5HS	5HS	1819	6153
0172E22	1_0318	11_10318	2529-2364		1147	MTP3	5H	51	42.31	5HS	5HS	5724	17452
0196E05	1_0318	11_10318	2529-2364		1147	MTP3	5H	51	42.31	5HS	5HS	9418	17428
0215O15	1_0318	11_10318	2529-2364		1147	MTP3	5H	51	42.31	5HS	5HS	5724	17452
0226D10	1_0252	11_10252	2225-2611		1186	MTP3	5H	51	42.31	5HS	5HS	411	2596
0287D08	3_0337	12_30337		U32_11794_413	19004	MTP5	5H	51	42.31	5HS	5HS	9517	18794
0350P01	3_0768	12_30768		U32_8820_286	17309	MTP6	5H	51	42.31	5HS	5HS	432	8003
0468K04	1_0177	11_10177	1861-2382		15223	MTP3	5H	51	42.31	5HS	5HS	2678	4509
0469K22	1_0177	11_10177	1861-2382		15223	MTP3	5H	51	42.31	5HS	5HS	2678	4509
0624D13	3_0792	12_30792		U32_9489_168	19745	MTP7	5H	51	42.31	5HS	5HS	7687	19158
0727D06	1_1399	12_11399	ABC20253-1-1-202		9984	MTP3	5H	51	42.31	5HS	5HS	13	1785
0175J22	1_1462	12_11462	ConsensusGBS0264-1		6518	MTP3	5H	51	42.31	5HS	5HL	3426	3609
0275J09	1_1462	12_11462	ConsensusGBS0264-1		6518	MTP5	5H	51	42.31	5HS	5HL	8596	16111
0333H06	3_1317	12_31317		U35_21473_455	21473	MTP6	5H	51	42.31	5HS	5HL	476	13717
0411L03	1_1462	12_11462	ConsensusGBS0264-1		6518	MTP3	5H	51	42.31	5HS	5HL	7803	10213
0624B13	1_1462	12_11462	ConsensusGBS0264-1		6518	MTP3	5H	51	42.31	5HS	5HL	7803	10218
0140O21	3_0728	12_30728		U32_8039_444	3697	MTP4	5H	51	42.31	5HS		1198	18088
0588J16	1_0481	11_10481	3500-1474		1674	MTP3	5H	51.2953	42.4053	5HO	5HO	52	1400
0659F14	1_0058	11_10058	1215-862		14662	MTP3	5H	51.2953	42.4053	5HO	5HO	2209	6740
0734P04	1_0058	11_10058	1215-862		14662	MTP3	5H	51.2953	42.4053	5HO	5HO	2209	6740
0125M03	2_0179	11_20179	1468-782		14894	MTP4	5H	51.6	42.51	5HL	5HL	2081	2345
0226D08	3_1259	12_31259		U35_19318_363	19318	MTP5	5H	51.6	42.51	5HL	5HL	8788	10838
0238N03	3_1259	12_31259		U35_19318_363	19318	MTP5	5H	51.6	42.51	5HL	5HL	5744	10743
0242H08	2_0179	11_20179	1468-782		14894	MTP3	5H	51.6	42.51	5HL	5HL	3879	6361
0255N21	3_0717	12_30717		U32_776_772	14132	MTP5	5H	51.6	42.51	5HL	5HL	5665	15292
0379O18	3_0408	12_30408		U32_2046_88	780	MTP6	5H	51.6	42.51	5HL	5HL	3680	6346
0445J07	3_0575	12_30575		U32_4981_1658	2642	MTP7	5H	51.2953	42.51	5HL	5HL	104	12728
0635D17	3_0109	12_30109		ABC08972_2_458	17768	MTP7	5H	51.6	42.51	5HL	5HL	5801	19516
0684F06	3_0575	12_30575		U32_4981_1658	2642	MTP8	5H	51.2953	42.51	5HL	5HL	104	12728
0054G12	1_1260	11_11260	ABC10705-1-1-263		4140	MTP4	5H	52.0157	43.1516	5HL	5HL	8773	19031
0381A03	3_0214	12_30214		ABC13248_1_3_194	20190	MTP6	5H	53.9035	44.8889	5HL	5HL	7943	18884
0254N05	2_0059	12_20059	11034-152		20701	MTP3	5H	55.3376	45.6352	5HL	5HL	2716	2665
0312D17	2_1536	11_21536	ConsensusGBS0654-4		15437	MTP3	5H	56.7717	46.3815	5HL	5HL	3160	1016
0312D17	3_1117	12_31117		U35_15437_940	15437	MTP3	5H	56.7717	46.3815	5HL	5HL	3160	1016
0388G17	2_1536	11_21536	ConsensusGBS0654-4		15437	MTP3	5H	56.7717	46.3815	5HL	5HL	3160	1016
0388G17	3_1117	12_31117		U35_15437_940	15437	MTP3	5H	56.7717	46.3815	5HL	5HL	3160	1016
0004E16	1_0508	12_10508	3643-2637		1487	MTP1	5H	56.7717	47.0422	5HL	5HL	6078	708
0387M06	1_0264	12_10264	2283-2886		15082	MTP6	5H	57.9791	47.0422	5HL	5HL	4896	10716
0395L03	1_0508	12_10508	3643-2637		1487	MTP3	5H	56.7717	47.0422	5HL	5HL	6078	708
0731I04	1_0264	12_10264	2283-2886		15082	MTP3	5H	57.9791	47.0422	5HL	5HL	3160	10718
0053O08	2_0239	11_20239	1732-491		798	MTP1	5H	57.3587	47.4704	5HL	5HL	10050	13304
0056B11	2_0239	11_20239	1732-491		798	MTP4	5H	57.3587	47.4704	5HL	5HL	5860	13937
0433E03	1_1128	11_11128	ABC05926-1-1-51		2444	MTP3	5H	51.6	47.4704	5HL	5HL	1517	4496
0617N08	1_1128	11_11128	ABC05926-1-1-51		2444	MTP3	5H	51.6	47.4704	5HL	5HL	1517	4496
0070I16	2_1260	11_21260	7741-527		18894	MTP4	5H	51.6	49.1649	5HL	5HL	2924	5232
0731I04	2_0332	11_20332	2283-2913		15082	MTP3	5H	51.6	49.1649	5HL	5HL	3160	10718
0055L03	3_0644	12_30644		U32_6403_547	17598	MTP4	5H	59.3999	50.5291	5HL	5HL	6799	8432
0064B21	1_0671	11_10671	4565-1583		16805	MTP1	5H	59.3999	50.5291	5HL	5HL	8202	17420
0121C04	3_0747	12_30747		U32_8334_579	5040	MTP4	5H	59.3999	50.5291	5HL	5HL	103	12521
0188F16	2_0372	11_20372	2505-850		1267	MTP4	5H	59.3999	50.5291	5HL	5HL	7677	15167
0347F23	1_0079	12_10079	1305-736		14769	MTP6	5H	57.9791	50.5291	5HL	5HL	3273	10683
0353N04	1_0671	11_10671	4565-1583		16805	MTP3	5H	59.3999	50.5291	5HL	5HL	8202	17420
0412I19	1_0079	12_10079	1305-736		14769	MTP6	5H	57.9791	50.5291	5HL	5HL	3273	10745
0664E20	2_0306	11_20306	2146-2256		1056	MTP3	5H	58.6995	50.5291	5HL	5HL	9736	19519
0731A08	3_1183	12_31183		U35_17419_413	17419	MTP8	5H	59.3999	50.5291	5HL	5HL	4238	12067
0612G18	1_0840	11_10840	6367-453		17317	MTP3	5H	59.3999	50.5291	5HL		1834	4488
0042O12	1_1151	12_11151	ABC06852-1-1-216		17420	MTP4	5H	59.3999	51.5078	5HL	5HL	2746	16036
0044D03	1_1151	12_11151	ABC06852-1-1-216		17420	MTP1	5H	59.3999	51.5078	5HL	5HL	4097	1880
0096G15	1_1221	11_11221	ABC09365-1-3-378		13723	MTP4	5H	60.7406	51.5078	5HL	5HL	9782	9539
0148B23	3_1064	12_31064		UCI_Pepc_996	1118	MTP4	5H	59.3999	51.5078	5HL	5HL	7457	19104
0174G09	2_0981	12_20981	5735-1891		3191	MTP4	5H	59.3999	51.5078	5HL	5HL	6058	1039
0174H23	1_1512	12_11512	ConsensusGBS0588-1		3133	MTP4	5H	59.3999	51.5078	5HL	5HL	5095	5260
0198L24	3_1451	12_31451		U35_5082_691	5082	MTP4	5H	59.3999	51.5078	5HL	5HL	7293	5296
0204A23	3_1062	12_31062		UCI_Pepc_1116	1118	MTP3	5H	59.3999	51.5078	5HL	5HL	3237	8316
0204A23	3_1064	12_31064		UCI_Pepc_996	1118	MTP3	5H	59.3999	51.5078	5HL	5HL	3237	8316
0227N10	3_0515	12_30515		U32_3899_1715	2121	MTP5	5H	60.7406	51.5078	5HL	5HL	6507	10382
0268G19	1_0899	12_10899	7235-395		3439	MTP5	5H	59.3999	51.5078	5HL	5HL	5000	11656
0335F12	1_1221	11_11221	ABC09365-1-3-378		13723	MTP3	5H	60.7406	51.5078	5HL	5HL	9795	4642
0335H10	3_0111	12_30111		ABC08998_1_415	18028	MTP6	5H	59.3999	51.5078	5HL	5HL	348	13711
0352E17	1_0899	12_10899	7235-395		3439	MTP6	5H	59.3999	51.5078	5HL	5HL	2539	11341
0352G21	1_0899	12_10899	7235-395		3439	MTP6	5H	59.3999	51.5078	5HL	5HL	4368	10980
0372K23	3_1062	12_31062		UCI_Pepc_1116	1118	MTP3	5H	59.3999	51.5078	5HL	5HL	3237	2492
0372K23	3_1064	12_31064		UCI_Pepc_996	1118	MTP3	5H	59.3999	51.5078	5HL	5HL	3237	2492
0390A09	1_1363	12_11363	ABC15807-1-3-518		20871	MTP3	5H	59.3999	51.5078	5HL	5HL	5993	6047
0428N11	2_1244	11_21244	7568-443		4670	MTP3			51.5078	5HL	5HL	594	2838
0451P09	1_0899	12_10899	7235-395		3439	MTP3	5H	59.3999	51.5078	5HL	5HL	10054	19870
0523J16	1_0899	12_10899	7235-395		3439	MTP3	5H	59.3999	51.5078	5HL	5HL	1426	19540
0602H01	2_0981	12_20981	5735-1891		3191	MTP7	5H	59.3999	51.5078	5HL	5HL	931	10609
0700J11	2_1244	11_21244	7568-443		4670	MTP3			51.5078	5HL	5HL	594	2838
0796E05	2_0981	12_20981	5735-1891		3191	MTP9	5H	59.3999	51.5078	5HL	5HL	931	5564
0014C14	3_1033	12_31033		UCI_Adh3_1293	14203	MTP4	5H	60.7406	52.8598	5HL	5HL	4137	2049
0014C14	3_1035	12_31035		UCI_Adh3_436	14203	MTP4	5H	60.7406	52.8598	5HL	5HL	4137	2049
0078G08	1_1089	12_11089	ABC04317-1-2-210		15804	MTP1	5H	60.7406	52.8598	5HL	5HL	3185	11001
0240I16	1_1089	12_11089	ABC04317-1-2-210		15804	MTP5	5H	60.7406	52.8598	5HL	5HL	3370	10665
0483H05	1_1385	12_11385	ABC17741-1-1-203		21355	MTP3	5H	60.7406	52.8598	5HL	5HL	8107	6099
0612C17	3_1032	12_31032		UCI_Adh3_107	14203	MTP7	5H	60.7406	52.8598	5HL	5HL	263	10770
0612C17	3_1033	12_31033		UCI_Adh3_1293	14203	MTP7	5H	60.7406	52.8598	5HL	5HL	263	10770
0612C17	3_1034	12_31034		UCI_Adh3_1592	14203	MTP7	5H	60.7406	52.8598	5HL	5HL	263	10770
0612C17	3_1035	12_31035		UCI_Adh3_436	14203	MTP7	5H	60.7406	52.8598	5HL	5HL	263	10770
0672M18	1_1159	11_11159	ABC07010-1-2-150		2667	MTP3	5H	60.7406	52.8598	5HL	5HL	10106
0685L05	3_0011	12_30011		ABC02265_1_483	2924	MTP8	5H	60.7406	52.8598	5HL	5HL	3081	18260
0723O10	3_1280	12_31280		U35_19843_1162	19843	MTP8	5H	60.7406	52.8598	5HL	5HL	5248	6848
0735F20	1_1159	11_11159	ABC07010-1-2-150		2667	MTP3	5H	60.7406	52.8598	5HL	5HL	10106	19566
0792B13	1_1089	12_11089	ABC04317-1-2-210		15804	MTP3	5H	60.7406	52.8598	5HL	5HL	4069	718
0483H05	2_1508	11_21508	ABC17741-1-2-493		21355	MTP3	5H	60.7406	52.8598	5HL		8107	6099
0071I15	1_1281	11_11281	ABC11529-1-1-295		20704	MTP4	5H	63.3087	54.7745	5HL	5HL	9158	18661
0075B07	1_1281	11_11281	ABC11529-1-1-295		20704	MTP1	5H	63.3087	54.7745	5HL	5HL	6323	6064
0662A13	3_1477	12_31477		U35_5542_109	5542	MTP3	5H	65.4899	56.7687	5HL	5HL	1308	17762
0378D14	2_1036	12_21036	6020-279		17849	MTP6	5H	66.3171	57.044	5HL	5HL	2707	14604
0568N23	2_1036	12_21036	6020-279		17849	MTP7	5H	66.3171	57.044	5HL	5HL	2707	14604
0105O13	2_1275	11_21275	7839-633		4254	MTP4	5H	67.5377	57.8943	5HL	5HL	7447	1612
0134E12	2_1275	11_21275	7839-633		4254	MTP4	5H	67.5377	57.8943	5HL	5HL	3292	8574
0585F19	1_0203	12_10203	1983-467		959	MTP3	5H	69.8991	59.7234	5HL	5HL	87	13709
0585F19	2_0278	12_20278	1982-836		959	MTP3	5H	69.8991	59.7234	5HL	5HL	87	13709
0600D10	1_0641	11_10641	4342-528		1724	MTP3	5H	69.8991	59.7234	5HL	5HL	4566	16954
0196C09	2_1239	11_21239	7504-485		4359	MTP4	5H	69.3387	60.2067	5HL	5HL	6743	19575
0338E01	3_0080	12_30080		ABC07516_1_341	15265	MTP6	5H	69.8991	60.2067	5HL	5HL	3206	12830
0459F21	1_1249	11_11249	ABC10441-1-4-203		4009	MTP3	5H	70.4794	60.2067	5HL	5HL	3697	4570
0784K04	1_1249	11_11249	ABC10441-1-4-203		4009	MTP3	5H	70.4794	60.2067	5HL	5HL	3697
0523J22	2_0350	12_20350	2365-405		15417	MTP3	5H	72.2871	61.8828	5HL	5HL	4087	2666
0428J23	1_0548	12_10548	3819-1948		1667	MTP6	5H	74.0614	62.623	5HL	5HL	1346	1398
0093G13	3_0719	12_30719		U32_7806_279	14276	MTP1	5H	74.7818	63.3265	5HL	5HL	4839	18299
0093G13	2_0297	12_20297	2075-320		15217	MTP1	5H	74.7818	63.3265	5HL	5HL	4839	18299
0523P22	3_0719	12_30719		U32_7806_279	14276	MTP3	5H	74.7818	63.3265	5HL	5HL	4839	18299
0295M03	1_0953	12_10953	8107-154		19062	MTP3	5H	75.4021	63.9321	5HL	5HL	575	2601
0405K16	2_0367	11_20367	2465-793		1048	MTP3	5H	75.4021	63.9321	5HL	5HL	227	3625
0731M22	2_0818	12_20818	4816-115		2886	MTP8	5H	76.4227	64.7947	5HL	5HL	428	4144
0277M12	1_0183	11_10183	1896-1435		448	MTP3	5H	80.0247	67.6576	5HL		9049	17957
0031G11	2_1128	12_21128	6669-1095		18454	MTP1	5H	80.605	68.2142	5HL	5HL	1376	2830
0788M22	2_1128	12_21128	6669-1095		18454	MTP9	5H	80.605	68.2142	5HL	5HL	6837	264
0793E13	1_0634	12_10634	4302-577		16962	MTP3	5H	80.605	68.2142	5HL	5HL	1192	15040
0793E13	1_0634	12_10634	4302-577		16962	MTP9	5H	80.605	68.2142	5HL	5HL	1192	15040
0792F22	1_0633	12_10633	4285-1877		2252	MTP3	5H	82.7596	69.2909	5HL	5HL	3148	17815
0786J22	1_0167	11_10167	1786-297		571	MTP3	5H	85.2076	71.9336	5HL	5HL	816	6837
0786J22	2_0246	11_20246	1780-778		575	MTP3	5H	85.2076	71.9336	5HL	5HL	816	6837
0582L23	2_0736	11_20736	4389-551		2045	MTP3	5H	85.928	72.6799	5HL	5HL	7595	10206
0582L23	1_1515	12_11515	ConsensusGBS0613-8		2045	MTP3	5H	85.928	72.6799	5HL	5HL	7595	10206
0024J02	2_1186	12_21186	7029-300		3970	MTP4	5H	87.3488	74.8332	5HL	5HL	10236	2099
0410M06	3_0314	12_30314		U32_10259_178	20444	MTP6	5H	87.3488	74.8332	5HL	5HL	4756	16697
0701K24	3_0314	12_30314		U32_10259_178	20444	MTP8	5H	87.3488	74.8332	5HL	5HL	4756	16697
0737H21	1_1355	11_11355	ABC14990-1-1-126		21043	MTP3	5H	86.6284	77.745	5HL	5HL	7733	14327
0363O06	3_1427	12_31427		U35_4373_471	4373	MTP6	5H	90.8374	79.519	5HL	5HL	7785	11689
0045K11	1_0674	12_10674	4599-425		17043	MTP1	5H	91.5578	80.1797	5HL	5HL	4661	17352
0314K04	1_0674	12_10674	4599-425		17043	MTP3	5H	91.5578	80.1797	5HL	5HL	4661
0647M02	1_0674	12_10674	4599-425		17043	MTP8	5H	91.5578	80.1797	5HL	5HL	1267	12761
0298A19	1_0930	12_10930	778-2050		14129	MTP3	5H	94.4328	83.1711	5HL	5HL	448	482
0328K23	1_1106	12_11106	ABC05080-pHv516		1822	MTP6	5H	94.4328	83.1711	5HL	5HL	8798	19131
0485C14	1_1290	11_11290	ABC11984-1-2-158		5189	MTP3	5H	94.4328	83.1711	5HL	5HL	3121	4676
0485C14	2_1497	12_21497	ABC11984-1-1-45		5189	MTP3	5H	94.4328	83.1711	5HL	5HL	3121	4676
0078A21	1_0578	11_10578	39-843		14407	MTP4	5H	95.0798	83.795	5HL	5HL	54	12522
0255K05	1_0578	11_10578	39-843		14407	MTP3	5H	95.0798	83.795	5HL	5HL	10318	19838
0523C18	1_0578	11_10578	39-843		14407	MTP3	5H	95.0798	83.795	5HL	5HL	10318	19838
0236L12	2_0497	11_20497	3200-242		17066	MTP3	5H	95.7802	84.4496	5HL	5HL	8951	12863
0286M19	1_1134	12_11134	ABC06096-1-1-185		16829	MTP3	5H	100.276	86.0768	5HL	5HL	8949	11086
0371A01	3_1271	12_31271		U35_19573_1049	19573	MTP6	5H	99.5556	86.0768	5HL	5HL	9946	10591
0409M20	3_1271	12_31271		U35_19573_1049	19573	MTP6	5H	99.5556	86.0768	5HL	5HL	9946	10591
0240J07	3_0533	12_30533		U32_4201_1988	2104	MTP5	5H	100.276	86.7375	5HL	5HL	2525	8882
0306H06	3_0533	12_30533		U32_4201_1988	2104	MTP5	5H	100.276	86.7375	5HL	5HL	2525	8882
0034K01	3_0834	12_30834		OSU_Contig5182_at_132	2033	MTP1	5H	100.276	88.0527	5HL	5HL	4167	13230
0034K01	1_0518	11_10518	3685-894		2033	MTP1	5H	100.276	88.0527	5HL	5HL	4167	13230
0613G14	1_0518	11_10518	3685-894		2033	MTP3	5H	100.276	88.0527	5HL	5HL	4167	13230
0613G14	3_0834	12_30834		OSU_Contig5182_at_132	2033	MTP3	5H	100.276	88.0527	5HL	5HL	4167	13230
0716M20	1_0771	11_10771	5440-455		17259	MTP3	5H	100.276	88.0527	5HL	5HL	684	2130
0226I23	1_1473	11_11473	ConsensusGBS0304-1		14523	MTP3	5H	100.276	89.3679	5HL	5HL	10160	7598
0073N14	1_0408	12_10408	3018-1012		2589	MTP1	5H	102.064	90.0653	5HL	5HL	1292	9612
0226I23	2_0449	11_20449	2947-1245		13944	MTP3	5H	100.276	90.0653	5HL	5HL	10160	7598
0627J23	2_0850	11_20850	5004-375		15884	MTP3	5H	102.064	90.0653	5HL		703	8077
0734C24	2_0850	11_20850	5004-375		15884	MTP3	5H	102.064	90.0653	5HL		703	8077
0102I01	2_0327	11_20327	2249-1308		1109	MTP1	5H	103.918	93.2218	5HL	5HL	2929	7058
0689D24	1_0414	11_10414	3056-1317		15957	MTP3	5H	103.918	93.2218	5HL	5HL	10036	16959
0045C08	2_0018	11_20018	10318-572		19187	MTP4	5H	106.086	93.6562	5HL	5HL	5480	15259
0681A19	1_1350	11_11350	ABC14689-1-9-399		1676	MTP3	5H	104.498	93.6562	5HL	5HL	3401	6010
0283J01	3_0098	12_30098		ABC08311_1_641	2700	MTP5	5H	105.219	94.4025	5HL	5HL	4151	10696
0403K03	2_0403	12_20403	2727-1286		15734	MTP3	5H	105.219	94.4025	5HL	5HL	1520	7
0491G20	2_0403	12_20403	2727-1286		15734	MTP3	5H	105.219	94.4025	5HL	5HL	1520	7
0056K18	2_0549	11_20549	3398-163		1705	MTP1	5H	108.014	95.106	5HL	5HL	321	16874
0072G18	2_0134	11_20134	1300-1462		192	MTP4	5H	106.159	95.106	5HL	5HL	10211	10405
0072G18	1_0077	12_10077	1300-1364		192	MTP4	5H	108.18	95.106	5HL	5HL	10211	10405
0305H13	2_0549	11_20549	3398-163		1705	MTP3	5H	108.014	95.106	5HL	5HL	321
0498A09	2_0549	11_20549	3398-163		1705	MTP3	5H	108.014	95.106	5HL	5HL	321	16874
0546H18	2_0549	11_20549	3398-163		1705	MTP3	5H	108.014	95.106	5HL	5HL	321
0305H13	2_0795	11_20795	4706-940		2623	MTP3	5H	108.634	95.522	5HL	5HL	321
0546H18	2_0795	11_20795	4706-940		2623	MTP3	5H	108.634	95.522	5HL	5HL	321
0008E12	3_1417	12_31417		U35_4145_1152	4145	MTP4	5H	108.18	96.1214	5HL	5HL	9697	19312
0099B22	1_0024	11_10024	10669-188		6295	MTP4	5H	107.593	96.1214	5HL	5HL	8454	3281
0568O07	3_0855	12_30855		OSU_HVCBF9_988	46609	MTP7	5H	108.18	96.1214	5HL	5HL	1844	15930
0648C17	1_0844	12_10844	6444-752		18060	MTP8	5H	108.18	97.4856	5HL	5HL	4339	3940
0247N10	3_0850	12_30850		OSU_HVCBF4A_875	21853	MTP3	5H	108.18	98.2013	5HL	5HL	6930	6073
0424C17	3_0847	12_30847		OSU_HVCBF3_76	23852	MTP6	5H	108.18	98.2013	5HL	5HL	1807	14771
0424E16	3_0852	12_30852		OSU_HVCBF6_851	15347	MTP6	5H	108.18	98.2013	5HL	5HL	1807	14771
0568O07	3_0854	12_30854		OSU_HVCBF9_907	46609	MTP7	5H	108.18	98.2013	5HL	5HL	1844	15930
0685J19	1_0834	11_10834	6315-914		17914	MTP3	5H	108.18	98.2013	5HL	5HL	1844	16894
0774G18	1_0834	11_10834	6315-914		17914	MTP3	5H	108.18	98.2013	5HL	5HL	1844	16894
0660P04	3_0705	12_30705		U32_7467_358	3323	MTP8	5H	110.262	103.01	5HL	5HL	965	10258
0097I24	1_0752	12_10752	5252-726		17377	MTP4			103.738	5HL	5HL	9109	19177
0565B16	1_0752	12_10752	5252-726		17377	MTP3			103.738	5HL	5HL	3400	16942
0434I19	1_1273	11_11273	ABC11221-1-3-410		18244	MTP3	5H	111.676	105.689	5HL	5HL		5822
0474H01	1_1273	11_11273	ABC11221-1-3-410		18244	MTP3	5H	111.676	105.689	5HL	5HL		5822
0541H19	1_0477	11_10477	3478-1024		14457	MTP3	5H	113.11	107.188	5HL	5HO	1609	521
0812C06	1_0477	11_10477	3478-1024		14457	MTP3	5H	113.11	107.188	5HL	5HO	1609	521
0541H19	3_0456	12_30456		U32_2783_2471	14462	MTP3	5H	113.11	107.188	5HL	5HL	1609	521
0660M09	3_0456	12_30456		U32_2783_2471	14462	MTP3	5H	113.11	107.188	5HL	5HL	1609	521
0486B20	3_0619	12_30619		U32_5830_1337	3068	MTP7	5H	113.83	108.277	5HL	5HL	518	2292
0507I05	1_1341	11_11341	ABC14350-1-2-242		18650	MTP3	5H	113.83	108.277	5HL	5HL	518	10514
0695I13	1_1341	11_11341	ABC14350-1-2-242		18650	MTP3	5H	113.83	108.277	5HL	5HL	518	10514
0656D12	1_1245	12_11245	ABC10263-1-2-215		18506	MTP8	5H	118.773	113.507	5HL	5HL	1245	10629
0697O09	1_1298	12_11298	ABC12379-1-3-324		5513	MTP3	5H	123.329	115.446	5HL	5HL	10403	19669
0697O09	2_0637	11_20637	3877-1923		181	MTP3	5H	123.075	115.764	5HL	5HL	10403	19669
0596F05	3_0524	12_30524		U32_4034_1438	16183	MTP7	5H	123.516	116.657	5HL	5HL	7176	10401
0383K20	3_1278	12_31278		U35_19814_680	19814	MTP6	5H	124.229	117.318	5HL	5HL	1299	14278
0051N06	1_1507	11_11507	ConsensusGBS0531-1		4453	MTP1	5H	125.81	118.156	5HL	5HL	2481	10127
0053N07	1_1507	11_11507	ConsensusGBS0531-1		4453	MTP4	5H	125.81	118.156	5HL	5HL	3873	17824
0256D22	1_1507	11_11507	ConsensusGBS0531-1		4453	MTP3	5H	125.81	118.156	5HL	5HL	2481	10127
0260K10	1_1456	11_11456	ConsensusGBS0234-1		21640	MTP3	5H	127.965	120.346	5HL	5HL	1418	1387
0260K10	3_0377	12_30377		U32_14622_323	21062	MTP3	5H	128.685	121.013	5HL	5HL	1418	1387
0049F22	1_1535	12_11535	ConsensusGBS0712-1		26266	MTP4	5H	129.406	121.673	5HL	5HL	5294	669
0065G16	2_0347	11_20347	2352-277		15491	MTP1	5H	129.406	121.673	5HL	5HL	7726	18699
0070L02	2_0347	11_20347	2352-277		15491	MTP4	5H	129.406	121.673	5HL	5HL	2215	14772
0112M10	1_1535	12_11535	ConsensusGBS0712-1		26266	MTP4	5H	129.406	121.673	5HL	5HL	10054	1536
0192H23	3_0169	12_30169		ABC11270_1_1_231	5290	MTP4	5H	129.406	121.673	5HL	5HL	5536	6869
0192H23	3_0590	12_30590		U32_5287_707	15845	MTP4	5H	129.406	121.673	5HL	5HL	5536	6869
0384N15	1_1535	12_11535	ConsensusGBS0712-1		26266	MTP6	5H	129.406	121.673	5HL	5HL	1005	1411
0389G04	1_1024	11_11024	971-682		1579	MTP3	5H	129.406	121.673	5HL	5HL	1226	6140
0569H14	1_0360	11_10360	272-944		14550	MTP3	5H	129.406	121.673	5HL	5HL	1226	6140
0569H14	1_1024	11_11024	971-682		1579	MTP3	5H	129.406	121.673	5HL	5HL	1226	6140
0778H12	1_1535	12_11535	ConsensusGBS0712-1		26266	MTP9	5H	129.406	121.673	5HL	5HL	5757	6448
0795O11	3_0169	12_30169		ABC11270_1_1_231	5290	MTP9	5H	129.406	121.673	5HL	5HL	6910	9260
0367I24	1_0228	12_10228	211-1181		14089	MTP3	5H	129.406	121.673	5HL		2952	6317
0560K20	1_0228	12_10228	211-1181		14089	MTP3	5H	129.406	121.673	5HL		2952	6317
0287P05	1_0805	11_10805	5844-1011		3283	MTP3	5H	130.126	122.328	5HL	5HL	6592	8759
0367I24	2_0300	11_20300	211-259		14089	MTP3	5H	130.126	122.328	5HL	5HL	2952	6317
0560K20	2_0300	11_20300	211-259		14089	MTP3	5H	130.126	122.328	5HL	5HL	2952	6317
0177A04	2_1325	11_21325	8388-578		3035	MTP4	5H	129.406	123.123	5HL	5HL	2306	10650
0298J02	2_1325	11_21325	8388-578		3035	MTP3	5H	129.406	123.123	5HL	5HL	3263	2405
0465H20	2_1325	11_21325	8388-578		3035	MTP3	5H	129.406	123.123	5HL	5HL	3263	2405
0346G18	1_1375	11_11375	ABC17073-1-1-298		8573	MTP3	5H	130.84	123.123	5HL		3263	2405
0454D05	3_0067	12_30067		ABC07029_1_290	2962	MTP3	5H	131.56	123.784	5HL	5HL	8380	17045
0454D05	1_0045	11_10045	1164-2683		14193	MTP3	5H	131.56	123.784	5HL		8380	17045
0089H15	1_0146	11_10146	1697-636		627	MTP1	5H	132.274	124.432	5HL	5HL	573	12746
0204F07	2_0259	11_20259	1863-275		13732	MTP3	5H	132.627	125.093	5HL	5HL	4084	2419
0204F07	2_0298	11_20298	2091-639		1154	MTP3	5H	132.627	125.093	5HL	5HL	4084	2419
0254H13	2_0298	11_20298	2091-639		1154	MTP3	5H	132.627	125.093	5HL	5HL	4084	2419
0254H13	2_0259	11_20259	1863-275		13732	MTP3	5H	132.627	125.093	5HL	5HL	4084	2419
0785L22	1_0705	11_10705	4795-782		16705	MTP3	5H	132.627	125.093	5HL	5HL	3247	5476
0089C17	2_0487	11_20487	314-559		17977	MTP1	5H	134.595	130.317	5HL	5HL	2225	16902
0089C17	1_0783	11_10783	5571-640		17001	MTP1	5H	135.716	130.317	5HL	5HL	2225	16902
0585M06	3_0668	12_30668		U32_6933_1106	16741	MTP7	5H	136.43	130.978	5HL	5HL	3110	67
0585M06	3_0869	12_30869		OSU_HvPhyC_4695	3684	MTP7	5H	136.43	130.978	5HL	5HL	3110	67
0689A13	3_0668	12_30668		U32_6933_1106	16741	MTP8	5H	136.43	130.978	5HL	5HL	3110	67
0689A13	3_0869	12_30869		OSU_HvPhyC_4695	3684	MTP8	5H	136.43	130.978	5HL	5HL	3110	67
0031B22	2_0188	11_20188	1501-353		687	MTP1	5H	137.157	130.978	5HL		10119	7224
0317M07	2_0188	11_20188	1501-353		687	MTP3	5H	137.157	130.978	5HL		10119	7224
0219G04	1_1448	11_11448	ConsensusGBS0138-2		3195	MTP3			131.645	5HL	5HL	495	20
0314J03	1_1448	11_11448	ConsensusGBS0138-2		3195	MTP3			131.645	5HL	5HL	495	20
0011E03	1_0855	11_10855	6553-328		16150	MTP4	5H	137.157	132.318	5HL	3HS	170	8226
0343D06	1_0855	11_10855	6553-328		16150	MTP3	5H	137.157	132.318	5HL	3HS	3842	11368
0031B22	3_0929	12_30929		SCRI_AY750993_SNP1_01	687	MTP1	5H	137.157	132.318	5HL	5HL	10119	7224
0031B22	3_0930	12_30930		SCRI_AY750993_SNP2_03	687	MTP1	5H	137.157	132.318	5HL	5HL	10119	7224
0267J02	3_1237	12_31237		U35_18649_1027	18649	MTP5	5H	137.157	132.318	5HL	5HL	1383	7336
0317M07	3_0929	12_30929		SCRI_AY750993_SNP1_01	687	MTP3	5H	137.157	132.318	5HL	5HL	10119	7224
0317M07	3_0930	12_30930		SCRI_AY750993_SNP2_03	687	MTP3	5H	137.157	132.318	5HL	5HL	10119	7224
0378K18	3_1237	12_31237		U35_18649_1027	18649	MTP6	5H	137.157	132.318	5HL	5HL	2089	10631
0427M10	3_1237	12_31237		U35_18649_1027	18649	MTP6	5H	137.157	132.318	5HL	5HL	2089	10631
0583I03	3_0635	12_30635		U32_6188_1308	17489	MTP3	5H	140.759	135.621	5HL	5HL	4071	9304
0076D04	1_1071	11_11071	ABC03113-1-1-251		15210	MTP1	5H	142.199	136.942	5HL	5HL	1753	4484
0175J01	3_1366	12_31366		U35_3029_481	3029	MTP3	5H	142.199	136.942	5HL	5HL	1605	18249
0175J01	1_0755	11_10755	5286-486		3030	MTP3	5H	142.199	136.942	5HL	5HL	1605	18249
0185C17	2_1289	11_21289	7965-579		18369	MTP4	5H	142.199	136.942	5HL	5HL	7268	342
0348B22	1_0755	11_10755	5286-486		3030	MTP3	5H	142.199	136.942	5HL	5HL	1605	18249
0365K22	1_1532	11_11532	ConsensusGBS0704-2		7616	MTP3	5H	142.199	136.942	5HL	5HL	4214	10141
0779M17	1_0845	11_10845	6450-755		2815	MTP3	5H	142.199	136.942	5HL	5HL	5345	16968
0142F11	1_0819	11_10819	6050-1625		3004	MTP4	5H	143.92	138.998	5HL	5HO	7688	16668
0142F11	2_0375	11_20375	2520-718		1210	MTP4	5H	143.92	138.998	5HL	5HL	7688	16668
0559A01	3_1217	12_31217		U35_18172_820	18172	MTP3	5H	144.634	139.628	5HL	5HL	5005	19711
0065D23	1_1092	11_11092	ABC04352-pHv108-01		15922	MTP1	5H	145.355	140.136	5HL	5HL	4044	8348
0069B23	1_1092	11_11092	ABC04352-pHv108-01		15922	MTP4	5H	145.355	140.136	5HL	5HL	2307	11539
0272F03	1_1092	11_11092	ABC04352-pHv108-01		15922	MTP3	5H	145.355	140.136	5HL	5HL	4044	8281
0276C03	1_1092	11_11092	ABC04352-pHv108-01		15922	MTP3	5H	145.355	140.136	5HL	5HL	4044	8281
0715D08	3_0833	12_30833		OSU_Contig3878_at_69	251	MTP3	5H	145.355	140.136	5HL	5HL	5912	18308
0067G11	2_0008	11_20008	1011-1338		14331	MTP4			141.481	5HL		1856	5019
0224C09	1_0104	11_10104	1461-529		658	MTP3	5H	146.002	141.879	5HL	5HL	7679	13290
0224C09	2_0676	11_20676	407-259		62	MTP3	5H	146.002	141.879	5HL	5HL	7679	13290
0444O18	1_0104	11_10104	1461-529		658	MTP3	5H	146.002	141.879	5HL	5HL	7679	13290
0444O18	2_0676	11_20676	407-259		62	MTP3	5H	146.002	141.879	5HL	5HL	7679	13290
0673M23	3_1182	12_31182		U35_17400_807	17400	MTP8	5H	146.002	141.879	5HL	5HL	7	5329
0063H22	3_1234	12_31234		U35_18533_855	18533	MTP4	5H	146.002	141.879	5HL		913	2059
0292D06	3_1234	12_31234		U35_18533_855	18533	MTP5	5H	146.002	141.879	5HL		5465	11399
0784I17	3_1234	12_31234		U35_18533_855	18533	MTP9	5H	146.002	141.879	5HL		5465	11502
0791K12	1_0080	11_10080	1306-408		14828	MTP3	5H	151.358	143.286	5HL	5HO	10094	2679
0689J01	2_1462	12_21462	ABC02249-1-1-321		14832	MTP3	5H	151.358	143.286	5HL	5HL	1024	8999
0300D19	1_1441	11_11441	ConsensusGBS0086-5		2792	MTP3	5H	151.358	143.286	5HL		2079	12044
0488K10	2_1077	11_21077	6260-183		461	MTP3	5H	146.002	143.286	5HL		1867	1606
0096E23	3_0400	12_30400		U32_1794_707	14610	MTP4	5H	149.103	143.941	5HL	5HL	5643	15110
0314P11	3_0400	12_30400		U32_1794_707	14610	MTP5	5H	149.103	143.941	5HL	5HL	6658	428
0314P11	3_0580	12_30580		U32_5092_965	2948	MTP5	5H	149.103	143.941	5HL	5HL	6658	428
0257L17	3_0062	12_30062		ABC06870_1_371	2280	MTP5	5H	151.358	147.489	5HL	5HL	4102	10757
0371J13	1_0904	12_10904	7382-626		3905	MTP3	5H	151.358	147.489	5HL	5HL	3549	17830
0615J12	3_1165	12_31165		U35_17121_1510	17121	MTP7	5H	151.358	147.489	5HL	5HL	2711	1867
0764E23	1_0363	11_10363	2746-1501		15588	MTP3	5H	151.358	147.489	5HL	5HL	3743	5453
0800M04	3_0062	12_30062		ABC06870_1_371	2280	MTP9	5H	151.358	147.489	5HL	5HL	4102	10757
0313E21	3_0795	12_30795		U32_9572_566	4903	MTP5	5H	152.792	148.577	5HL	5HL	4371	1688
0702N09	3_0795	12_30795		U32_9572_566	4903	MTP8	5H	152.792	148.577	5HL	5HL	4371	1688
0808C02	3_1221	12_31221		U35_18258_220	18258	MTP9	5H	152.792	148.577	5HL	5HL	4161	13884
0654L12	3_0830	12_30830		OSU_Contig294_s_at_57	16166	MTP3	5H	153.512	149.275	5HL	5HL	8224	8134
0094E16	2_0104	11_20104	1204-1104		14453	MTP1	5H	153.512	149.936	5HL	5HL	3730	11573
0094E16	1_0016	12_10016	104-641		54	MTP1	5H	153.512	149.936	5HL	5HL	3730	11573
0096O04	2_0104	11_20104	1204-1104		14453	MTP4	5H	153.512	149.936	5HL	5HL	4931	15642
0096O04	1_0016	12_10016	104-641		54	MTP4	5H	153.512	149.936	5HL	5HL	4931	15642
0654L12	1_0217	11_10217	203-1128		16166	MTP3	5H	153.512	149.936	5HL	5HL	8224	8134
0654L12	1_0589	11_10589	4050-2006		16555	MTP3	5H	153.512	149.936	5HL	5HL	8224	8134
0654L12	2_1355	11_21355	8682-406		19186	MTP3	5H	153.512	149.936	5HL	5HL	8224	8134
0754K09	1_0016	12_10016	104-641		54	MTP9	5H	153.512	149.936	5HL	5HL	3730	11573
0322H08	1_1490	11_11490	ConsensusGBS0397-16		2368	MTP3	5H	153.599	150.29	5HL	5HL	8939	13065
0182A10	2_0186	12_20186	14978-553		22996	MTP4	5H	154.413	150.651	5HL	5HL	933	18188
0296F07	2_0186	12_20186	14978-553		22996	MTP5	5H	154.413	150.651	5HL	5HL	2274	12317
0360I15	2_0186	12_20186	14978-553		22996	MTP6	5H	154.413	150.651	5HL	5HL	754	10323
0067A11	1_1497	11_11497	ConsensusGBS0451-1		5166	MTP1	5H	155.127	151.349	5HL	5HL	3166	10138
0373C06	1_1497	11_11497	ConsensusGBS0451-1		5166	MTP3	5H	155.127	151.349	5HL	5HL	3166	10138
0064M19	1_1185	11_11185	ABC07987-1-6-270		3368	MTP1	5H	159.089	154.077	5HL	5HL	5810	4635
0079B20	1_1185	11_11185	ABC07987-1-6-270		3368	MTP4	5H	159.089	154.077	5HL	5HL	2852	1860
0305J13	3_0759	12_30759		U32_8565_505	18944	MTP5	5H	159.789	154.077	5HL	5HL	1366	3406
0385E04	1_0820	11_10820	6054-1050		16726	MTP3	5H	159.089	154.077	5HL	5HL	5099	3331
0385E04	2_1041	11_21041	603-72		389	MTP3	5H	159.089	154.077	5HL	5HL	5099	3331
0446L13	3_0759	12_30759		U32_8565_505	18944	MTP7	5H	159.789	154.077	5HL	5HL	1366	3406
0798I03	3_0238	12_30238		ABC15036_1_738	21137	MTP3	5H	159.789	154.077	5HL	5HL	3514	14622
0451O14	1_0536	11_10536	3759-1385		16202	MTP3	5H	159.789	155.233	5HL	5HL	10389	19846
0792N16	2_1452	11_21452	9864-225		17762	MTP3	5H	159.789	155.233	5HL	5HL	382	17752
0197C16	1_0902	11_10902	7342-535		2675	MTP3	5H	159.789	155.447	5HL	5HL	9902	19718
0243J24	1_0902	11_10902	7342-535		2675	MTP3	5H	159.789	155.447	5HL	5HL	9902	19718
0259A06	2_0317	12_20317	2193-516		15426	MTP5	5H	159.789	155.447	5HL	5HL	5201	2095
0430A23	1_0741	11_10741	5163-896		17196	MTP3	5H	159.789	155.447	5HL	5HL	6555	17000
0648E15	1_0528	11_10528	3720-52		16387	MTP3	5H	159.789	155.447	5HL	5HL	9902	2768
0197C16	1_0161	11_10161	1761-804		841	MTP3	5H	159.789	155.447	5HL		9902	19718
0243J24	1_0161	11_10161	1761-804		841	MTP3	5H	159.789	155.447	5HL		9902	19718
0077C21	2_0078	11_20078	11470-478		21420	MTP4	5H	159.789	155.655	5HL	5HL	2674	6293
0554P05	2_1024	11_21024	5925-565		420	MTP3	5H	159.789	155.655	5HL	5HL	3762	13223
0618E02	1_0582	11_10582	4015-1153		16406	MTP3	5H	159.789	155.655	5HL	5HL	4513	17404
0773H21	2_1024	11_21024	5925-565		420	MTP3	5H	159.789	155.655	5HL	5HL	3762	13223
0276C19	2_0646	11_20646	3931-1434		15043	MTP3	5H	161.584	157.607	5HL	5HL	1799	14120
0393C13	1_0273	12_10273	2309-1354		405	MTP3	5H	161.584	157.607	5HL	5HL	1799	2616
0476M07	3_1375	12_31375		U35_3226_1469	3226	MTP7	5H	161.584	157.607	5HL	5HL	677	13109
0592P12	2_1018	11_21018	5893-1285		17486	MTP3	5H	161.584	157.607	5HL	5HL	8986	15959
0593K04	1_1325	12_11325	ABC13614-1-1-320		20850	MTP3	5H	161.584	157.607	5HL	5HL	10198	19767
0593K04	1_1325	12_11325	ABC13614-1-1-320		20850	MTP7	5H	161.584	157.607	5HL	5HL	10198	19767
0593K04	3_0642	12_30642		U32_6342_1490	3982	MTP3	5H	161.584	157.607	5HL	5HL	10198	19767
0593K04	3_0642	12_30642		U32_6342_1490	3982	MTP7	5H	161.584	157.607	5HL	5HL	10198	19767
0696L23	3_0162	12_30162		ABC11039_1_102	17912	MTP8	5H	161.584	157.607	5HL	5HL	2134	3542
0794L07	3_0162	12_30162		ABC11039_1_102	17912	MTP9	5H	161.584	157.607	5HL	5HL	2134	3542
0192J05	1_1464	11_11464	ConsensusGBS0269-1		5775	MTP3	5H	161.584	158.28	5HL	5HL	5885	14904
0731G05	2_0988	11_20988	5757-248		17130	MTP3	5H	161.584	158.28	5HL	5HL	667	1315
0186A04	3_0666	12_30666		U32_6903_1480	17907	MTP3	5H	169.508	162.029	5HL	5HL	915	19737
0261K14	3_0666	12_30666		U32_6903_1480	17907	MTP5	5H	169.508	162.029	5HL	5HL	680	3727
0618K06	3_0566	12_30566		U32_4897_828	1973	MTP7	5H	171.663	162.684	5HL	5HL	6464	17471
0340L13	2_0686	11_20686	4117-472		16477	MTP3	5H	172.383	163.724	5HL	5HL	5533	108
0402J15	3_0087	12_30087		ABC07825_1_403	16332	MTP6	5H	172.383	163.724	5HL	5HL	3692	13237
0453J11	2_0686	11_20686	4117-472		16477	MTP3	5H	172.383	163.724	5HL	5HL	9286	13332
0575O06	3_0087	12_30087		ABC07825_1_403	16332	MTP3	5H	172.383	163.724	5HL	5HL	3692	13237
0049C05	1_0593	11_10593	4066-328		16529	MTP4			164.36	5HL	5HO	6331	19513
0063P17	1_0593	11_10593	4066-328		16529	MTP4			164.36	5HL	5HO	646	8806
0139I11	1_0593	11_10593	4066-328		16529	MTP4			164.36	5HL	5HO	1268	2333
0296I13	1_0593	11_10593	4066-328		16529	MTP3			164.36	5HL	5HO	4621	13243
0124K11	1_0869	11_10869	6735-754		3973	MTP2	5H	173.083	165.278	5HL	5HL	9735	19507
0608E11	1_0869	11_10869	6735-754		3973	MTP3	5H	173.083	165.278	5HL	5HL	9735	19854
0647O04	2_1012	11_21012	585-342		370	MTP3	5H	176.619	167.4	5HL	5HL	1812	15230
0500I16	1_0600	11_10600	4103-1386		16639	MTP3	5H	176.619	167.4	5HL		5929	2669
0121O01	1_0870	11_10870	6736-452		3302	MTP4			168.673	5HL	5HL	568	1423
0072B17	1_1450	12_11450	ConsensusGBS0152-1		1295	MTP1	5H	178.433	169.144	5HL	5HL	2356	12383
0771D20	1_1010	12_11010	930-595		14174	MTP3	5H	178.433	169.144	5HL	5HL	2356	12383
0771D20	1_1450	12_11450	ConsensusGBS0152-1		1295	MTP3	5H	178.433	169.144	5HL	5HL	2356	12383
0018B18	1_0254	11_10254	2244-3247		1012	MTP1	5H	179.06	169.719	5HL	5HL	9367	18359
0068D09	1_0254	11_10254	2244-3247		1012	MTP1	5H	179.06	169.719	5HL	5HL	9367	18359
0229K13	3_0656	12_30656		U32_6578_886	3854	MTP3	5H	179.64	169.719	5HL	5HL	2930	16932
0315L04	3_0656	12_30656		U32_6578_886	3854	MTP5	5H	179.64	169.719	5HL	5HL	4269	14210
0666K12	3_0494	12_30494		U32_3501_418	16419	MTP3	5H	180.714	171.579	5HL	5HL	1186	9002
0783G24	3_0494	12_30494		U32_3501_418	16419	MTP3	5H	180.714	171.579	5HL	5HL	1186	9002
0273J24	1_0736	11_10736	5145-1355		2716	MTP3	5H	180.714	171.579	5HL		6953	17027
0571L16	1_0736	11_10736	5145-1355		2716	MTP3	5H	180.714	171.579	5HL		6953	17027
0072A24	1_0236	11_10236	2144-852		1011	MTP4	5H	181.435	172.833	5HL	5HL	7614	11694
0074J09	1_0236	11_10236	2144-852		1011	MTP1	5H	181.435	172.833	5HL	5HL	3706	2408
0672A21	1_0405	11_10405	3007-1337		1114	MTP3			172.833	5HL	5HL	10258	19566
0783G24	1_0236	11_10236	2144-852		1011	MTP3	5H	181.435	172.833	5HL	5HL	1186	9002
0363O23	3_0504	12_30504		U32_3706_309	16073	MTP6	5H	182.162	173.499	5HL	5HL	3066	6851
0640L24	3_0504	12_30504		U32_3706_309	16073	MTP8	5H	182.162	173.499	5HL	5HL	4496	9561
0643H09	3_0769	12_30769		U32_8845_393	16509	MTP8	5H	182.882	174.166	5HL	5HL	3035	10653
0080P07	2_1393	12_21393	9110-748		19696	MTP4	5H	186.478	177.904	5HL	5HL	2659	16018
0279K05	3_0577	12_30577		U32_5031_1217	2562	MTP5	5H	182.882	177.904	5HL	5HL	728	19658
0080P07	3_1352	12_31352		U35_2757_804	2757	MTP4	5H	182.882	181.207	5HL	5HL	2659	16018
0031G11	1_0310	11_10310	2493-660		15306	MTP1	5H	187.958	183.14	5HL	5HL	1376	2830
0599F04	3_1292	12_31292		U35_20347_823	20347	MTP7	5H	189.599	184.994	5HL	5HL	2231	10651
0698O05	1_1364	11_11364	ABC16075-2-2-232		20649	MTP3	5H	189.599	184.994	5HL	5HL	2435	6030
0589E15	1_1192	12_11192	ABC08225-1-1-100		17839	MTP3	5H	191.387	186.658	5HL	5HL	7825	7142
0662C01	1_1192	12_11192	ABC08225-1-1-100		17839	MTP8	5H	191.387	186.658	5HL	5HL	4342	7078
0744E01	1_1192	12_11192	ABC08225-1-1-100		17839	MTP8	5H	191.387	186.658	5HL	5HL	2009	3153
0124C15	1_0401	11_10401	2978-938		15894	MTP4	5H	191.967	187.196	5HL	5HL	7119	18682
0333K16	2_1052	11_21052	6116-709		3405	MTP3	5H	189.599	187.196	5HL	5HL	3242	9322
0335M05	1_0401	11_10401	2978-938		15894	MTP3	5H	191.967	187.196	5HL	5HL	2383	17309
0359O22	3_0360	12_30360		U32_13213_63	7332	MTP6	5H	191.967	187.196	5HL	5HL	2069	15618
[truncated: 1,105 more rows]
