# Supplementary material for: Combinatorial Pooling Enables Selective Sequencing of the Barley Gene Space
Source: PLOS journal article supplement (doi:10.1371/journal.pcbi.1003010), 2013-04-04
Supplement: S13 (10.1371/journal.pcbi.1003010.s013) [file journal.pcbi.1003010.s013]

| HV5 pool | 1 BAC     | 2 BACs    | 3 BACs | Percentage | HV5 pool       | 1 BAC            | 2 BACs         | 3 BACs        | Percentage    |
|----------|-----------|-----------|--------|------------|----------------|------------------|----------------|---------------|---------------|
| 1        | 4,819,809 | 1,361,096 | 22,413 | 72.23%     | 47             | 2,678,468        | 707,740        | 11,405        | 70.71%        |
| 2        | 3,356,009 | 773,496   | 11,241 | 70.92%     | 48             | 1,369,486        | 346,430        | 4,368         | 69.21%        |
| 3        | 2,928,866 | 852,784   | 11,806 | 73.49%     | 49             | 3,487,998        | 1,020,879      | 11,639        | 69.47%        |
| 4        | 2,719,426 | 655,721   | 9,354  | 70.87%     | 50             | 4,152,521        | 1,011,419      | 16,806        | 70.53%        |
| 5        | 2,134,539 | 550,159   | 6,554  | 72.34%     | 51             | 2,570,124        | 712,912        | 8,537         | 71.10%        |
| 6        | 2,621,358 | 740,313   | 9,647  | 71.23%     | 52             | 2,343,768        | 674,626        | 9,985         | 72.12%        |
| 7        | 2,296,717 | 684,713   | 9,099  | 70.07%     | 53             | 3,346,147        | 746,610        | 11,218        | 71.17%        |
| 8        | 2,159,752 | 621,167   | 7,954  | 71.77%     | 54             | 4,435,090        | 1,157,021      | 15,397        | 70.77%        |
| 9        | 2,433,324 | 674,402   | 9,906  | 70.94%     | 55             | 3,447,887        | 908,114        | 12,100        | 72.87%        |
| 10       | 2,495,663 | 665,023   | 8,358  | 69.78%     | 56             | 2,469,629        | 702,317        | 9,724         | 71.93%        |
| 11       | 4,487,909 | 1,139,795 | 14,919 | 71.93%     | 57             | 4,482,223        | 1,265,902      | 19,130        | 73.73%        |
| 12       | 2,806,989 | 656,867   | 7,383  | 70.85%     | 58             | 3,830,086        | 1,014,000      | 14,148        | 73.47%        |
| 13       | 5,583,911 | 1,347,428 | 23,039 | 70.88%     | 59             | 2,614,274        | 698,170        | 10,303        | 72.59%        |
| 14       | 2,284,650 | 595,029   | 9,435  | 69.37%     | 60             | 3,768,648        | 1,087,327      | 13,907        | 72.18%        |
| 15       | 2,857,396 | 635,683   | 13,903 | 70.90%     | 61             | 3,533,073        | 955,348        | 12,618        | 73.50%        |
| 16       | 2,057,522 | 520,255   | 6,564  | 73.22%     | 62             | 2,066,678        | 561,530        | 6,632         | 72.20%        |
| 17       | 2,384,207 | 578,633   | 7,367  | 69.53%     | 63             | 2,843,156        | 753,623        | 9,946         | 73.03%        |
| 18       | 3,898,797 | 1,037,323 | 14,261 | 71.89%     | 64             | 2,824,251        | 749,455        | 11,829        | 72.14%        |
| 19       | 4,070,134 | 1,029,797 | 15,535 | 71.86%     | 65             | 4,306,217        | 1,002,165      | 15,848        | 70.85%        |
| 20       | 2,596,261 | 631,889   | 9,508  | 72.99%     | 66             | 2,543,969        | 636,442        | 9,883         | 72.46%        |
| 21       | 3,413,895 | 928,178   | 12,544 | 71.79%     | 67             | 3,278,529        | 802,352        | 11,650        | 72.48%        |
| 22       | 2,730,569 | 760,841   | 9,474  | 71.92%     | 68             | 5,067,615        | 1,421,635      | 17,796        | 72.31%        |
| 23       | 4,015,312 | 1,051,903 | 12,655 | 70.61%     | 69             | 3,133,900        | 752,926        | 9,632         | 74.18%        |
| 24       | 3,134,394 | 917,029   | 12,535 | 70.46%     | 70             | 5,066,050        | 1,364,484      | 23,341        | 72.79%        |
| 25       | 2,544,742 | 691,088   | 7,881  | 70.20%     | 71             | 4,984,935        | 1,405,677      | 20,345        | 71.14%        |
| 26       | 2,520,794 | 676,274   | 8,294  | 71.63%     | 72             | 3,671,420        | 974,582        | 12,897        | 71.74%        |
| 27       | 1,450,596 | 261,775   | 3,390  | 69.43%     | 73             | 3,935,179        | 1,049,687      | 13,507        | 71.70%        |
| 28       | 3,102,789 | 477,918   | 10,209 | 70.81%     | 74             | 2,667,700        | 735,036        | 13,378        | 72.22%        |
| 29       | 1,560,722 | 429,857   | 5,518  | 72.62%     | 75             | 1,891,923        | 446,900        | 5,392         | 72.60%        |
| 30       | 2,251,092 | 632,236   | 8,219  | 72.85%     | 76             | 6,189,933        | 1,808,781      | 21,952        | 70.68%        |
| 31       | 2,057,050 | 616,615   | 8,083  | 72.61%     | 77             | 5,311,495        | 1,133,613      | 13,325        | 71.11%        |
| 32       | 2,492,383 | 753,568   | 11,370 | 72.59%     | 78             | 3,512,563        | 919,104        | 13,369        | 70.25%        |
| 33       | 1,853,107 | 563,378   | 6,254  | 72.01%     | 79             | 2,730,042        | 524,566        | 7,215         | 69.40%        |
| 34       | 4,015,683 | 1,051,878 | 18,413 | 72.18%     | 80             | 2,778,343        | 506,951        | 7,824         | 70.41%        |
| 35       | 1,902,102 | 642,667   | 8,702  | 70.89%     | 81             | 3,693,776        | 1,088,443      | 12,793        | 72.51%        |
| 36       | 1,316,800 | 359,575   | 4,450  | 67.32%     | 82             | 4,184,258        | 1,219,432      | 17,039        | 73.09%        |
| 37       | 3,475,027 | 1,089,877 | 13,217 | 72.35%     | 83             | 2,354,926        | 640,439        | 12,482        | 73.17%        |
| 38       | 4,375,684 | 1,084,768 | 15,712 | 69.94%     | 84             | 5,551,482        | 1,148,488      | 14,139        | 70.54%        |
| 39       | 3,702,940 | 893,985   | 11,375 | 72.63%     | 85             | 2,858,149        | 844,537        | 10,748        | 72.93%        |
| 40       | 3,061,833 | 916,000   | 14,896 | 71.10%     | 86             | 3,202,475        | 912,971        | 13,387        | 73.88%        |
| 41       | 3,240,123 | 761,146   | 8,966  | 71.34%     | 87             | 2,346,634        | 665,816        | 10,151        | 72.80%        |
| 42       | 2,284,961 | 625,217   | 9,521  | 72.03%     | 88             | 2,861,075        | 710,085        | 7,662         | 73.25%        |
| 43       | 2,247,624 | 546,920   | 6,379  | 71.41%     | 89             | 4,954,952        | 1,273,423      | 18,529        | 72.17%        |
| 44       | 1,789,146 | 460,577   | 5,713  | 73.06%     | 90             | 2,591,877        | 764,120        | 8,811         | 72.61%        |
| 45       | 1,809,105 | 438,958   | 5,845  | 71.91%     | 91             | 2,623,489        | 834,179        | 11,398        | 71.98%        |
| 46       | 1,481,743 | 401,135   | 10,960 | 37.63%     | <b>Average</b> | <b>3,114,064</b> | <b>818,079</b> | <b>11,462</b> | <b>71.30%</b> |

**Table S5:** Number of barley HV5 reads per pool deconvoluted to one, two, or three BACs; the percentage column reports the fraction of the total number of reads that were deconvoluted to at least one BAC.
