# Supplementary material for: Combinatorial Pooling Enables Selective Sequencing of the Barley Gene Space
Source: PLoS Comput Biol. 2013 Apr 4;9(4):e1003010. doi: 10.1371/journal.pcbi.1003010 (PMC3617026; doi:10.1371/journal.pcbi.1003010)
Supplement: Table S2 — Number of rice reads per pool deconvoluted to one, two, or three BACs; the percentage column reports the fraction of the total number of reads that were deconvoluted to at least one BAC, and the total number of correct reads. (PDF) [file pcbi.1003010.s010.pdf]

| Rice pool | 1 BAC   | 2 BACs    | 3 BACs  | %Total | %Correct | Rice pool | 1 BAC   | 2 BACs    | 3 BACs  | %Total | %Correct |
|-----------|---------|-----------|---------|--------|----------|-----------|---------|-----------|---------|--------|----------|
| 1         | 390,925 | 1,021,202 | 218,965 | 81.55% | 99.57%   | 47        | 415,306 | 958,780   | 238,508 | 80.63% | 99.53%   |
| 2         | 401,930 | 1,010,577 | 226,119 | 81.93% | 99.45%   | 48        | 395,628 | 988,326   | 244,361 | 81.42% | 99.39%   |
| 3         | 446,845 | 1,019,560 | 199,438 | 83.29% | 99.59%   | 49        | 341,453 | 1,062,420 | 232,221 | 81.8%  | 99.55%   |
| 4         | 460,513 | 1,012,335 | 187,729 | 83.03% | 99.59%   | 50        | 440,861 | 943,720   | 244,218 | 81.44% | 99.55%   |
| 5         | 455,705 | 947,515   | 222,519 | 81.29% | 99.52%   | 51        | 441,704 | 983,305   | 192,133 | 80.86% | 99.55%   |
| 6         | 391,456 | 1,044,628 | 198,262 | 81.72% | 99.63%   | 52        | 410,569 | 962,425   | 242,805 | 80.79% | 99.62%   |
| 7         | 391,010 | 1,045,500 | 230,553 | 83.35% | 99.62%   | 53        | 400,208 | 1,018,204 | 211,243 | 81.48% | 99.53%   |
| 8         | 388,850 | 991,831   | 243,614 | 81.21% | 99.58%   | 54        | 380,140 | 969,012   | 253,479 | 80.13% | 99.49%   |
| 9         | 381,752 | 975,607   | 256,767 | 80.71% | 99.58%   | 55        | 420,342 | 1,007,343 | 211,307 | 81.95% | 99.56%   |
| 10        | 346,968 | 1,045,075 | 243,428 | 81.77% | 99.64%   | 56        | 449,944 | 979,593   | 215,811 | 82.27% | 99.57%   |
| 11        | 394,704 | 964,910   | 227,215 | 79.34% | 99.57%   | 57        | 393,856 | 1,060,639 | 209,274 | 83.19% | 99.55%   |
| 12        | 420,363 | 936,500   | 222,287 | 78.96% | 99.49%   | 58        | 368,063 | 1,062,521 | 224,716 | 82.77% | 99.62%   |
| 13        | 411,143 | 969,745   | 239,441 | 81.02% | 99.6%    | 59        | 382,411 | 1,064,979 | 191,622 | 81.95% | 99.56%   |
| 14        | 386,831 | 1,028,001 | 226,478 | 82.07% | 99.62%   | 60        | 394,017 | 992,574   | 235,947 | 81.13% | 99.62%   |
| 15        | 360,496 | 1,053,183 | 245,686 | 82.97% | 99.59%   | 61        | 428,393 | 968,451   | 234,017 | 81.54% | 99.62%   |
| 16        | 413,108 | 1,031,143 | 193,165 | 81.87% | 99.6%    | 62        | 511,416 | 934,536   | 204,130 | 82.5%  | 99.59%   |
| 17        | 426,155 | 984,613   | 202,242 | 80.65% | 99.54%   | 63        | 323,162 | 1,019,112 | 248,197 | 79.52% | 99.41%   |
| 18        | 425,161 | 972,202   | 229,742 | 81.36% | 99.55%   | 64        | 447,481 | 936,733   | 230,762 | 80.75% | 99.64%   |
| 19        | 377,124 | 993,507   | 256,679 | 81.37% | 99.62%   | 65        | 392,007 | 968,324   | 242,245 | 80.13% | 99.58%   |
| 20        | 392,747 | 1,012,836 | 216,100 | 81.08% | 99.55%   | 66        | 346,148 | 1,021,575 | 231,422 | 79.96% | 99.49%   |
| 21        | 358,849 | 1,016,130 | 237,873 | 80.64% | 99.49%   | 67        | 410,069 | 922,582   | 230,421 | 78.15% | 99.38%   |
| 22        | 438,686 | 998,197   | 214,066 | 82.55% | 99.55%   | 68        | 432,649 | 952,708   | 224,847 | 80.51% | 99.56%   |
| 23        | 440,145 | 959,963   | 230,235 | 81.52% | 99.61%   | 69        | 373,656 | 983,368   | 260,897 | 80.9%  | 99.61%   |
| 24        | 470,767 | 970,915   | 207,429 | 82.46% | 99.48%   | 70        | 399,624 | 1,040,903 | 203,423 | 82.2%  | 99.61%   |
| 25        | 413,950 | 968,673   | 229,748 | 80.62% | 99.57%   | 71        | 417,006 | 1,032,484 | 204,127 | 82.68% | 99.59%   |
| 26        | 380,879 | 993,435   | 225,879 | 80.01% | 99.56%   | 72        | 430,118 | 1,002,137 | 212,012 | 82.21% | 99.51%   |
| 27        | 409,336 | 1,011,286 | 204,935 | 81.28% | 99.61%   | 73        | 430,159 | 1,020,881 | 199,634 | 82.53% | 99.66%   |
| 28        | 413,659 | 970,618   | 230,663 | 80.75% | 99.58%   | 74        | 389,350 | 983,376   | 246,105 | 80.94% | 99.56%   |
| 29        | 478,045 | 956,413   | 219,851 | 82.72% | 99.63%   | 75        | 485,180 | 968,794   | 207,182 | 83.06% | 99.58%   |
| 30        | 437,710 | 958,018   | 239,748 | 81.77% | 99.62%   | 76        | 427,825 | 999,602   | 229,448 | 82.84% | 99.64%   |
| 31        | 312,489 | 1,051,366 | 263,548 | 81.37% | 99.59%   | 77        | 348,986 | 1,047,405 | 238,092 | 81.72% | 99.61%   |
| 32        | 399,797 | 1,001,191 | 223,652 | 81.23% | 99.45%   | 78        | 394,006 | 1,008,216 | 227,993 | 81.51% | 99.57%   |
| 33        | 368,754 | 1,049,749 | 209,490 | 81.4%  | 99.51%   | 79        | 349,668 | 1,028,294 | 220,179 | 79.91% | 99.51%   |
| 34        | 394,542 | 1,029,862 | 193,241 | 80.88% | 99.54%   | 80        | 422,887 | 975,647   | 231,153 | 81.48% | 99.46%   |
| 35        | 384,702 | 1,067,284 | 185,431 | 81.87% | 99.51%   | 81        | 404,990 | 998,443   | 222,417 | 81.29% | 99.55%   |
| 36        | 381,991 | 988,185   | 228,927 | 79.96% | 99.52%   | 82        | 429,214 | 985,137   | 219,765 | 81.71% | 99.58%   |
| 37        | 447,843 | 909,650   | 263,912 | 81.07% | 99.52%   | 83        | 391,829 | 1,046,567 | 175,777 | 80.71% | 99.56%   |
| 38        | 453,436 | 996,709   | 210,853 | 83.05% | 99.69%   | 84        | 418,626 | 999,325   | 229,379 | 82.37% | 99.63%   |
| 39        | 403,907 | 995,495   | 241,792 | 82.06% | 99.57%   | 85        | 412,015 | 977,566   | 239,830 | 81.47% | 99.62%   |
| 40        | 383,803 | 1,010,100 | 230,899 | 81.24% | 99.56%   | 86        | 415,146 | 973,912   | 220,785 | 80.49% | 99.43%   |
| 41        | 406,096 | 998,748   | 211,387 | 80.81% | 99.53%   | 87        | 399,776 | 980,706   | 242,806 | 81.16% | 99.57%   |
| 42        | 457,064 | 1,002,075 | 188,545 | 82.38% | 99.62%   | 88        | 372,785 | 1,026,350 | 238,468 | 81.88% | 99.57%   |
| 43        | 430,717 | 1,028,726 | 196,809 | 82.81% | 99.6%    | 89        | 436,803 | 988,090   | 225,036 | 82.5%  | 99.63%   |
| 44        | 380,624 | 1,031,742 | 210,096 | 81.12% | 99.63%   | 90        | 385,299 | 1,018,026 | 238,231 | 82.08% | 99.62%   |
| 45        | 357,076 | 992,491   | 257,128 | 80.33% | 99.58%   | 91        | 445,759 | 986,738   | 205,512 | 81.9%  | 99.59%   |
| 46        | 426,502 | 1,023,330 | 224,662 | 83.72% | 99.62%   | Average   | 406,612 | 998,798   | 224,167 | 81.48% | 99.57%   |

**Table S2:** Number of rice reads per pool deconvoluted to one, two, or three BACs; the percentage column reports the fraction of the total number of reads that were deconvoluted to at least one BAC, and the total number of correct reads.
